# Supplementary material for: Regioselective heterofunctionalization of alpha-aryl amides with heteroatom nucleophiles via electrophilic activation
Source: Royal Society of Chemistry journal article supplement (doi:10.1039/d3qo01174g), 2023-01-01

# Regioselective heterofunctionalization of alpha-aryl amides with heteroatom nucleophiles *via* electrophilic activation

Shuai Han<sup>1</sup>, Yu Guo<sup>1\*</sup>, Wei Zhang<sup>1</sup>, Jinjin Chen<sup>1</sup>, Zhen Wang<sup>1,2\*</sup> & Yao-Fu Zeng<sup>1\*</sup>

<sup>1</sup> School of Pharmaceutical Science, Hengyang Medical School, University of South China, Hengyang, Hunan, 421001

<sup>2</sup> MOE Key Lab of Rare Pediatric Diseases, University of South China, Hengyang, Hunan, 421001

## Supporting Information

### Table of Contents

|                                                                                  |    |
|----------------------------------------------------------------------------------|----|
| 1. General Information .....                                                     | 2  |
| 2. Experimental Section .....                                                    | 2  |
| 2.1 General procedure for the synthesis of starting materials <b>1a~1j</b> ..... | 2  |
| 2.2 General procedure for the synthesis of products <b>3-6</b> .....             | 2  |
| 2.3 General procedure for the synthesis of products <b>7</b> .....               | 3  |
| 2.4 The experimental procedure for the synthesis of product <b>11</b> .....      | 3  |
| 2.5 The experimental procedure for the synthesis of product <b>12</b> .....      | 4  |
| 2.6 The experimental procedure for the synthesis of product <b>13</b> .....      | 4  |
| 2.7 Screening of the reaction conditions .....                                   | 5  |
| 2.8 Monitoring the reaction intermediate.....                                    | 6  |
| 3. Single crystal X-ray structure of compound <b>3a</b> .....                    | 9  |
| 4. Characterization data of products.....                                        | 15 |
| 5. Reference .....                                                               | 37 |
| 6. NMR spectra of products .....                                                 | 38 |

## 1. General Information

All reagents were obtained commercially and used without further purification. All solvents were dried and distilled according to standard procedures. Column chromatography was performed on silica gel (200-300 mesh).  $^1\text{H}$  and  $^{13}\text{C}$  NMR spectra were recorded in  $\text{CDCl}_3$  ( $\text{DMSO}-d_6$ ,  $\text{CD}_3\text{OD}$ ) on a Bruker Ascend 500 spectrometer operating at 500 MHz and 126 MHz, respectively. The chemical shifts ( $\delta$ ) were expressed in ppm and coupling constants (J) were in Hz. The following abbreviations are used for the multiplicities: s: singlet, d: doublet, t: triplet, q: quartet, m: multiplet, br s: broad singlet for proton spectra. High-resolution mass spectra (HRMS) were recorded on a FT ICRMS 15T Bruker or Thermo Fisher Q-Exactive mass spectrometer using electrospray ionization or chemical ionization techniques. Analytical thin layer chromatography was performed on Polygram SIL G/UV<sub>254</sub> plates. Visualization was accomplished with short wave UV light, or  $\text{KMnO}_4$  staining solutions followed by heating.

## 2. Experimental Section

### 2.1 General procedure for the synthesis of starting materials 1a~1j

The starting materials **1a~1j** were synthesized according to the known methods <sup>[1]</sup>.

### 2.2 General procedure for the synthesis of products 3-6

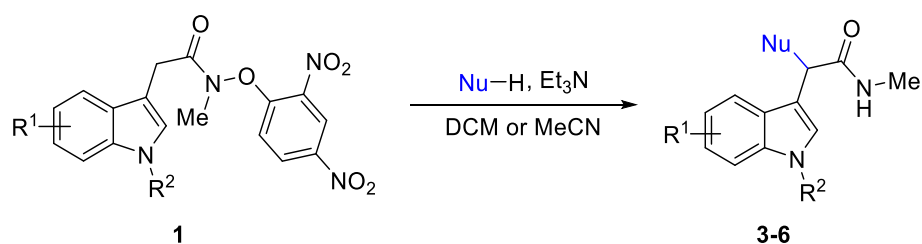

To a mixture of **1** (0.2 mmol, 1.0 equiv.) in DCM or MeCN (2.0 mL) was added amine (0.24 mmol, 1.2 equiv.) or phenol (0.24 mmol, 1.2 equiv.) or alcohol (0.4 mmol, 2.0 equiv.) and Et<sub>3</sub>N (0.4 mmol, 2 equiv.). Then the mixture was stirred at room temperature (30 °C for alcohol) under air atmosphere for 12-18 h. After the reaction was completed, the reaction mixture was concentrated in vacuum. The residue was

purified by flash column chromatography over silica gel using a mixture of petroleum ether and ethyl acetate as eluent to give the desired products **3-6**.

### 2.3 General procedure for the synthesis of products **7**

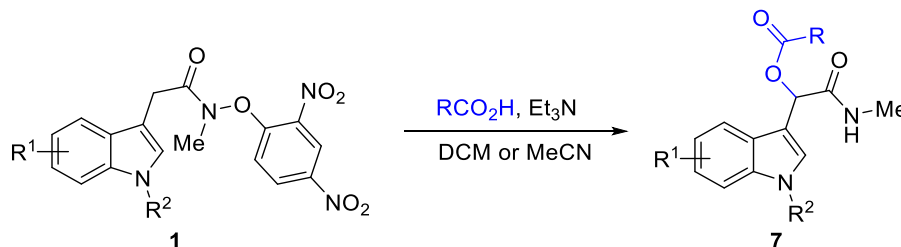

To a mixture of **1** (0.2 mmol, 1.0 equiv.) in DCM was added carboxylic acid (0.3 mmol, 1.5 equiv.) and  $\text{Et}_3\text{N}$  (0.8 mmol, 4.0 equiv.). Then the mixture was stirred at room temperature under air atmosphere for 16 h. After the reaction was completed, the reaction mixture was concentrated in vacuum. The residue was purified by flash column chromatography over silica gel using a mixture of petroleum ether and ethyl acetate as eluent to give the desired products **7**.

### 2.4 The experimental procedure for the synthesis of product **11**

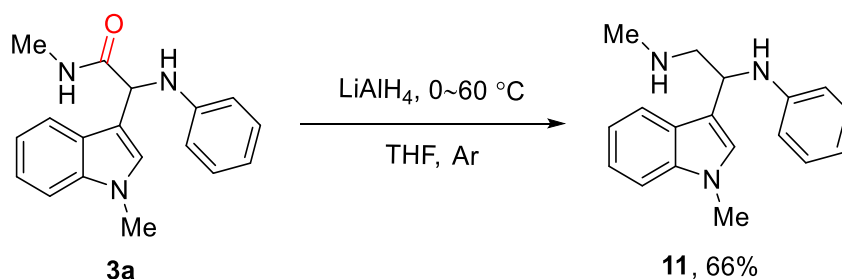

To a mixture of **3a** (0.2 mmol, 1.0 equiv.) in dry THF (2.0 mL) was added  $\text{LiAlH}_4$  (2.5 M in THF, 2 mmol, 10 equiv.) at 0 °C. Then the reaction temperature was elevated to 60 °C and stirred for 5 h under argon atmosphere. Upon completion as monitored by TLC, the reaction mixture was cooled to 0 °C and carefully quenched with  $\text{H}_2\text{O}$ . The mixture was filtered and the residue was washed with DCM. The filtrate was extracted with DCM for three times. The combined organic extracts were dried over  $\text{Na}_2\text{SO}_4$  and concentrated in vacuum. The residue was purified by flash column chromatography over silica gel using a mixture of DCM and MeOH as eluent to give the desired product **11**.

## 2.5 The experimental procedure for the synthesis of product 12

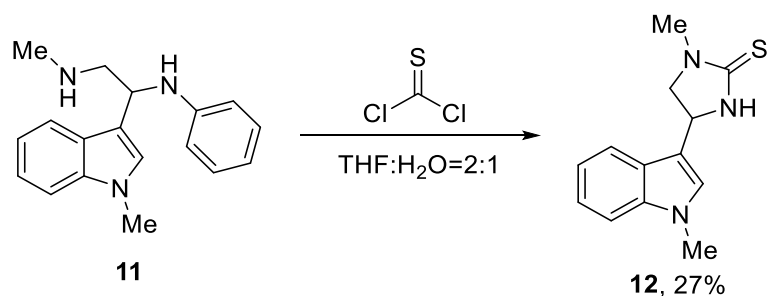

To a mixture of **11** (0.2 mmol, 1.0 equiv.) in THF (2.0 mL)/H<sub>2</sub>O (1.0 mL) was added sulphosgene (0.6 mmol, 3.0 equiv.). Then the mixture was stirred at room temperature for 30 min under argon atmosphere. Upon completion as monitored by TLC, the reaction was concentrated in vacuum. The residue was purified by flash column chromatography over silica gel using a mixture of petroleum ether and ethyl acetate as eluent to give the desired product **12**.

## 2.6 The experimental procedure for the synthesis of product 13

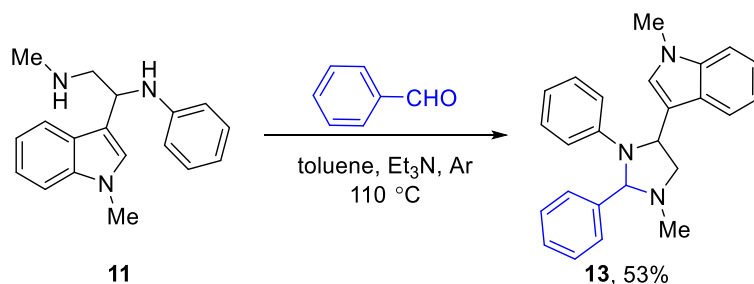

To a mixture of **11** (0.2 mmol, 1.0 equiv.) in toluene (2.0 mL) was added benzaldehyde (0.3 mmol, 1.5 equiv.) and Et<sub>3</sub>N (0.2 mmol, 1.0 equiv.). The mixture was stirred at 110 °C for 6 h under argon atmosphere. Upon completion as monitored by TLC, the reaction was concentrated in vacuum. The residue was purified by flash column chromatography over silica gel using a mixture of petroleum ether and ethyl acetate as eluent to give the desired product **13**.

## 2.7 Screening of the reaction conditions

**Table 1** Screening of the base<sup>a</sup>

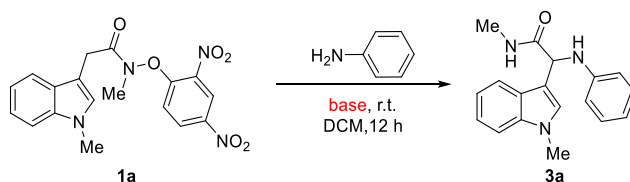

| entry | base                            | <b>3a</b> yield (%) <sup>b</sup> |
|-------|---------------------------------|----------------------------------|
| 1     | Et <sub>3</sub> N               | 92                               |
| 2     | DIPEA                           | 30                               |
| 3     | DBU                             | 90                               |
| 4     | KO <sup>t</sup> Bu              | 87                               |
| 5     | Cs <sub>2</sub> CO <sub>3</sub> | 41                               |
| 6     | K <sub>2</sub> CO <sub>3</sub>  | 47                               |

<sup>a</sup> Reaction conditions: **1a** (0.1 mmol), aniline (0.2 mmol, 2 equiv.), base (0.2 mmol, 2 equiv.), acetone (1.0 mL), r.t., 12 h. <sup>b</sup> <sup>1</sup>H NMR yield, using 4-methylbenzophenone as the internal standard.

**Table 2** Screening of the solvent<sup>a</sup>

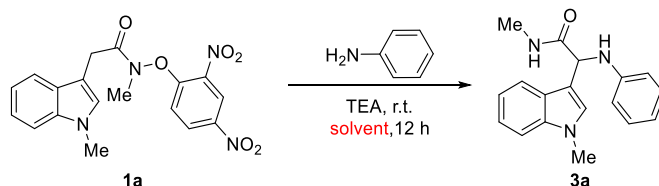

| entry | solvent          | <b>3a</b> yield (%) <sup>b</sup> |
|-------|------------------|----------------------------------|
| 1     | CCl <sub>4</sub> | 63                               |
| 2     | toluene          | 54                               |
| 3     | DCM              | 92                               |
| 4     | pyridine         | 91                               |
| 5     | THF              | 76                               |
| 6     | acetonitrile     | 92                               |
| 7     | DMSO             | 80                               |

<sup>a</sup> Reaction conditions: **1a** (0.1 mmol), aniline (0.2 mmol, 2 equiv.), TEA (0.2 mmol, 2 equiv.), solvent (1.0 mL), r.t., 12 h. <sup>b</sup> <sup>1</sup>H NMR yield, using 4-methylbenzophenone as the internal standard.

**Table 3** Screening of the amount of Et<sub>3</sub>N<sup>a</sup>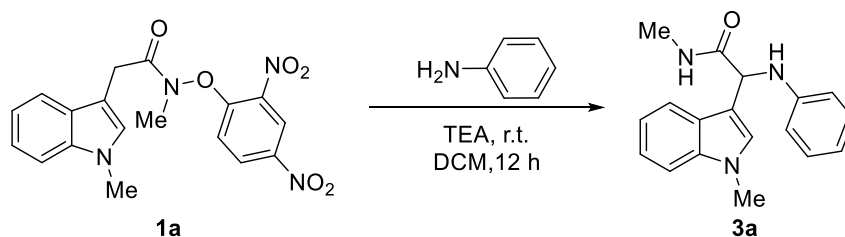

| entry | Et <sub>3</sub> N (equiv.) | <b>3a</b> yield (%) <sup>b</sup> |
|-------|----------------------------|----------------------------------|
| 1     | 0.5                        | 43                               |
| 2     | 1.0                        | 79                               |
| 3     | 1.5                        | 83                               |
| 4     | 2.0                        | 92                               |

<sup>a</sup> Reaction conditions: **1a** (0.1 mmol), aniline (0.2 mmol, 2 equiv.), TEA, DCM (1.0 mL), r.t., 12 h. <sup>b</sup> <sup>1</sup>H NMR yield, using 4-methylbenzophenone as the internal standard.

**Table 4** Screening of the amount of aniline<sup>a</sup>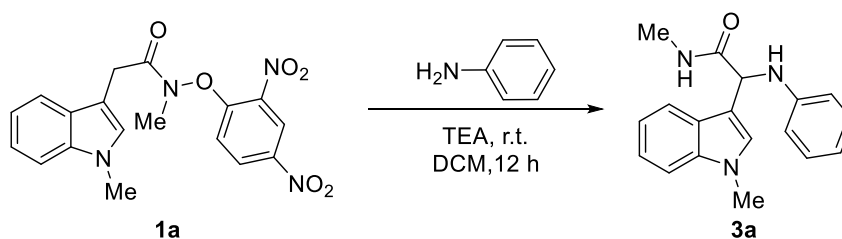

| entry | aniline (equiv.) | <b>3a</b> yield (%) <sup>b</sup> |
|-------|------------------|----------------------------------|
| 1     | 1                | 88                               |
| 2     | 1.2              | 94                               |
| 3     | 1.4              | 91                               |

<sup>a</sup> Reaction conditions: **1a** (0.1 mmol), aniline, TEA (0.2 mmol, 2 equiv.), DCM (1.0 mL), r.t., 12 h. <sup>b</sup> <sup>1</sup>H NMR yield, using 4-methylbenzophenone as the internal standard.

## 2.8 Monitoring the reaction intermediate

### 1) The proposed mechanism

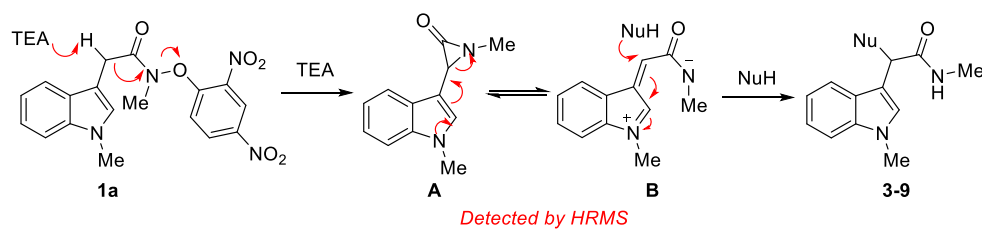

2) In the presence of aniline

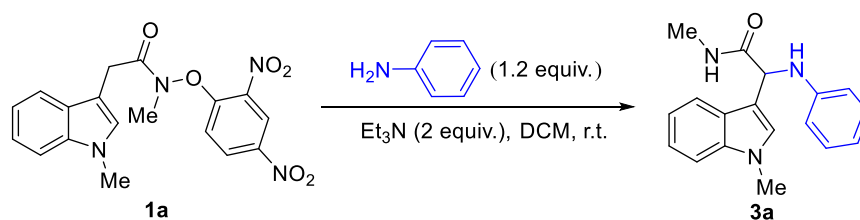

To a mixture of **1a** (0.2 mmol, 1.0 equiv.) in DCM (2.0 mL) was added aniline (0.24 mmol, 1.2 equiv.) and Et<sub>3</sub>N (0.4 mmol, 2 equiv.). Then the mixture was stirred at room temperature under air atmosphere for 5 h. The reaction mixture was monitored by HRMS (ESI).

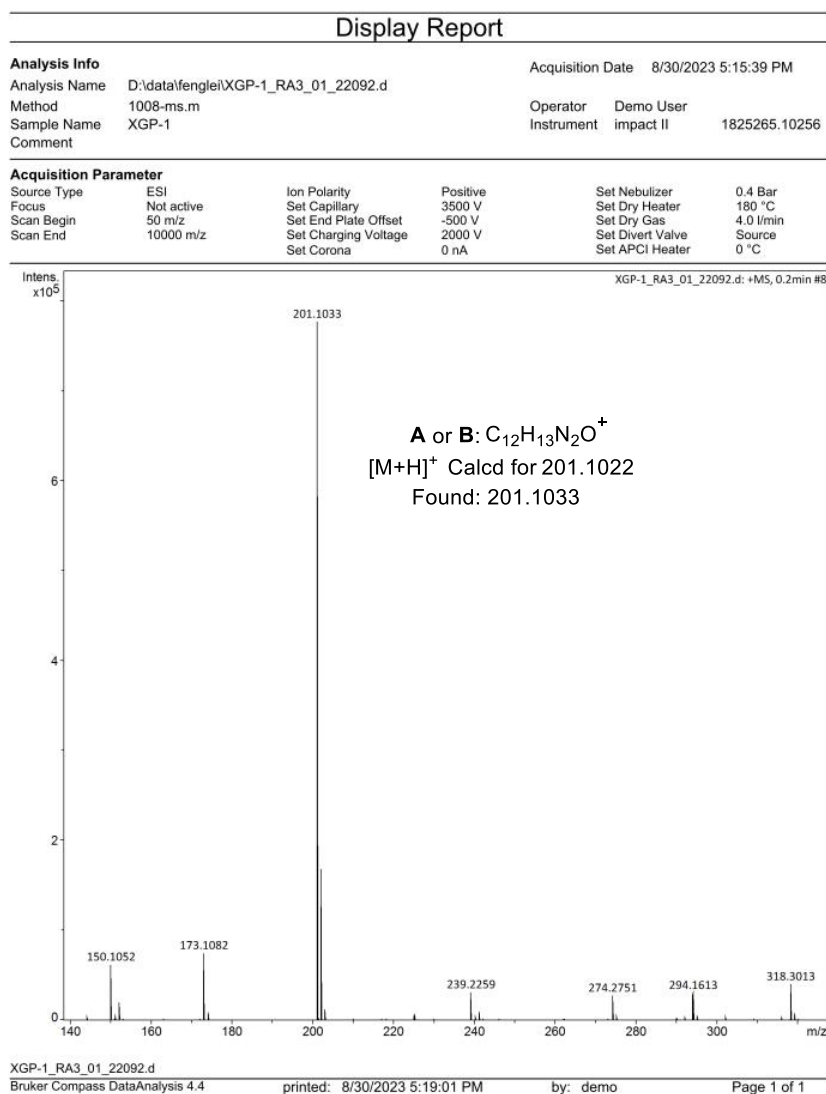

Fig.1 The HRMS (ESI) of the reaction mixture (in the presence of aniline)

3) In the absence of aniline

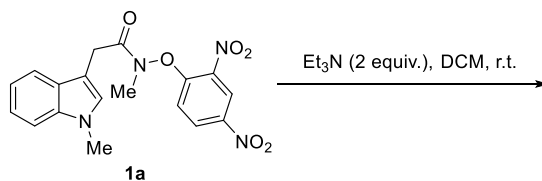

To a mixture of **1a** (0.2 mmol, 1.0 equiv.) in DCM (2.0 mL) was added Et<sub>3</sub>N (0.4 mmol, 2 equiv.). Then the mixture was stirred at room temperature under air atmosphere for 5 h. The reaction mixture was monitored by HRMS (ESI).

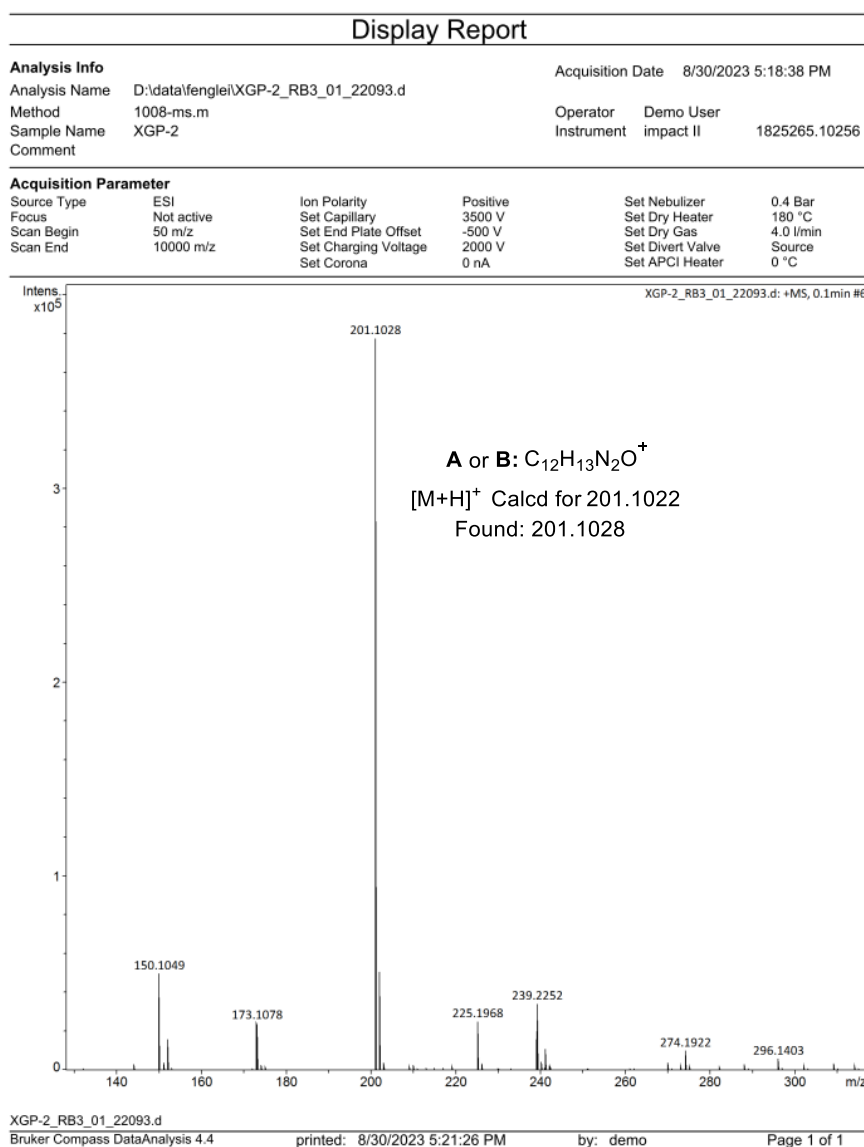

Fig.2 The HRMS (ESI) of the reaction mixture (in the absence of aniline)



### 3. Single crystal X-ray structure of compound 3a

**Crystal Data** for C<sub>18</sub>H<sub>19</sub>N<sub>3</sub>O (*M* = 293.36 g/mol): monoclinic, space group P2<sub>1</sub>/c (no. 14), *a* = 10.2374(7) Å, *b* = 9.6937(5) Å, *c* = 17.3010(12) Å, β = 105.152(7)°, *V* = 1657.24(19) Å<sup>3</sup>, *Z* = 4, *T* = 293.15 K, μ(MoKα) = 0.075 mm<sup>-1</sup>, *D*<sub>calc</sub> = 1.176 g/cm<sup>3</sup>, 7402 reflections measured (4.122° ≤ 2θ ≤ 58.588°), 3858 unique (*R*<sub>int</sub> = 0.0271, *R*<sub>sigma</sub> = 0.0428) which were used in all calculations. The final *R*<sub>1</sub> was 0.0633 (*I* > 2σ(*I*)) and *wR*<sub>2</sub> was 0.1867 (all data).

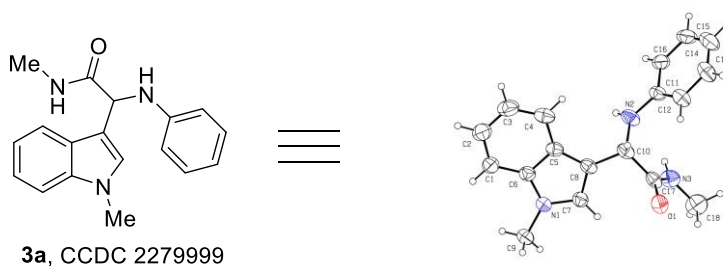

**Table 1 Crystal data and structure refinement for 3a.**

|                                          |                                                                              |
|------------------------------------------|------------------------------------------------------------------------------|
| Identification code                      | <b>3a</b>                                                                    |
| Empirical formula                        | C <sub>18</sub> H <sub>19</sub> N <sub>3</sub> O                             |
| Formula weight                           | 293.36                                                                       |
| Temperature/K                            | 293.15                                                                       |
| Crystal system                           | monoclinic                                                                   |
| Space group                              | P2 <sub>1</sub> /c                                                           |
| <i>a</i> /Å                              | 10.2374(7)                                                                   |
| <i>b</i> /Å                              | 9.6937(5)                                                                    |
| <i>c</i> /Å                              | 17.3010(12)                                                                  |
| α/°                                      | 90                                                                           |
| β/°                                      | 105.152(7)                                                                   |
| γ/°                                      | 90                                                                           |
| Volume/Å <sup>3</sup>                    | 1657.24(19)                                                                  |
| <i>Z</i>                                 | 4                                                                            |
| ρ <sub>calc</sub> /g/cm <sup>3</sup>     | 1.176                                                                        |
| μ/mm <sup>-1</sup>                       | 0.075                                                                        |
| <i>F</i> (000)                           | 624.0                                                                        |
| Crystal size/mm <sup>3</sup>             | 0.48 × 0.38 × 0.32                                                           |
| Radiation                                | MoKα (λ = 0.71073)                                                           |
| 2θ range for data collection/°           | 4.122 to 58.588                                                              |
| Index ranges                             | -8 ≤ <i>h</i> ≤ 13, -13 ≤ <i>k</i> ≤ 9, -23 ≤ <i>l</i> ≤ 21                  |
| Reflections collected                    | 7402                                                                         |
| Independent reflections                  | 3858 [ <i>R</i> <sub>int</sub> = 0.0271, <i>R</i> <sub>sigma</sub> = 0.0428] |
| Data/restraints/parameters               | 3858/0/201                                                                   |
| Goodness-of-fit on <i>F</i> <sup>2</sup> | 1.023                                                                        |

|                                                |                                  |
|------------------------------------------------|----------------------------------|
| Final R indexes [ $I \geq 2\sigma(I)$ ]        | $R_1 = 0.0633$ , $wR_2 = 0.1478$ |
| Final R indexes [all data]                     | $R_1 = 0.1162$ , $wR_2 = 0.1867$ |
| Largest diff. peak/hole / $e \text{ \AA}^{-3}$ | 0.19/-0.19                       |

**Table 2 Fractional Atomic Coordinates ( $\times 10^4$ ) and Equivalent Isotropic Displacement Parameters ( $\text{\AA}^2 \times 10^3$ ) for 3a.  $U_{eq}$  is defined as 1/3 of the trace of the orthogonalised  $U_{ij}$  tensor.**

| Atom | x          | y           | z          | U(eq)     |
|------|------------|-------------|------------|-----------|
| O1   | -258.7(18) | 7920.7(15)  | 1948.9(9)  | 71.1(5)   |
| N1   | -107.4(18) | 8366.6(18)  | 4548.9(10) | 58.6(5)   |
| N2   | 2108(2)    | 10532.3(18) | 2937.2(12) | 69.4(6)   |
| N3   | -491(2)    | 10230.2(19) | 1922.6(13) | 74.8(6)   |
| C1   | 1798(3)    | 8315(2)     | 5796.1(15) | 72.4(7)   |
| C2   | 3170(3)    | 8462(3)     | 6063.2(18) | 91.4(9)   |
| C3   | 3964(3)    | 8728(3)     | 5544(2)    | 93.5(10)  |
| C4   | 3406(3)    | 8906(2)     | 4738.0(18) | 75.6(7)   |
| C5   | 2001(2)    | 8781(2)     | 4439.4(14) | 57.8(6)   |
| C6   | 1221(2)    | 8459(2)     | 4976.8(14) | 57.6(6)   |
| C7   | -183(2)    | 8640(2)     | 3765.2(13) | 58.6(6)   |
| C8   | 1070(2)    | 8905(2)     | 3664.7(13) | 56.6(6)   |
| C9   | -1232(2)   | 7970(3)     | 4861.8(14) | 71.8(7)   |
| C10  | 1417(2)    | 9219(2)     | 2890.6(13) | 58.8(6)   |
| C11  | 2852(2)    | 10913(2)    | 2408.2(13) | 57.6(6)   |
| C12  | 3051(2)    | 10041(3)    | 1815.1(15) | 70.5(7)   |
| C13  | 3865(3)    | 10434(3)    | 1328.6(17) | 88.5(9)   |
| C14  | 4470(3)    | 11687(4)    | 1413(2)    | 99.4(10)  |
| C15  | 4256(3)    | 12584(3)    | 1984.8(19) | 89.1(9)   |
| C16  | 3460(2)    | 12208(2)    | 2483.3(15) | 69.6(7)   |
| C17  | 154(2)     | 9078(2)     | 2201.3(14) | 58.4(6)   |
| C18  | -1724(3)   | 10246(3)    | 1284.1(19) | 102.2(10) |

**Table 3 Anisotropic Displacement Parameters ( $\text{\AA}^2 \times 10^3$ ) for 3a. The Anisotropic displacement factor exponent takes the form:  $-2\pi^2[h^2a^{*2}U_{11}+2hka^*b^*U_{12}+\dots]$ .**

| <b>Atom</b> | <b><math>U_{11}</math></b> | <b><math>U_{22}</math></b> | <b><math>U_{33}</math></b> | <b><math>U_{23}</math></b> | <b><math>U_{13}</math></b> | <b><math>U_{12}</math></b> |
|-------------|----------------------------|----------------------------|----------------------------|----------------------------|----------------------------|----------------------------|
| O1          | 105.1(13)                  | 45.6(8)                    | 66.5(10)                   | -6.6(7)                    | 29.4(9)                    | -4.7(8)                    |
| N1          | 58.3(11)                   | 62.6(11)                   | 57.4(11)                   | 4.2(9)                     | 19.4(9)                    | -8.1(8)                    |
| N2          | 89.3(15)                   | 48.1(10)                   | 83.5(14)                   | -7.7(9)                    | 45.0(12)                   | -14.8(9)                   |
| N3          | 83.2(15)                   | 43.8(10)                   | 95.0(15)                   | 3.8(10)                    | 19.0(12)                   | -2.1(9)                    |
| C1          | 78.5(17)                   | 63.8(14)                   | 69.1(16)                   | 11.7(12)                   | 8.9(13)                    | -13.0(12)                  |
| C2          | 86(2)                      | 81.7(18)                   | 91(2)                      | 24.1(15)                   | -4.4(17)                   | -16.9(15)                  |
| C3          | 64.0(17)                   | 83.9(19)                   | 117(3)                     | 25.5(17)                   | -4.5(17)                   | -9.7(14)                   |
| C4          | 63.3(16)                   | 57.2(14)                   | 109(2)                     | 8.5(14)                    | 28.4(15)                   | -4.6(12)                   |
| C5          | 57.7(13)                   | 42.5(11)                   | 73.6(15)                   | 3.1(10)                    | 18.0(11)                   | -3.4(9)                    |
| C6          | 59.6(14)                   | 46.4(11)                   | 66.2(14)                   | 3.0(10)                    | 15.2(11)                   | -6.6(9)                    |
| C7          | 62.4(14)                   | 57.3(13)                   | 58.1(13)                   | -2.5(10)                   | 19.2(11)                   | -6.0(10)                   |
| C8          | 65.2(14)                   | 42.3(11)                   | 69.6(14)                   | -1.6(10)                   | 30.5(11)                   | -3.8(10)                   |
| C9          | 72.6(16)                   | 80.0(16)                   | 69.1(15)                   | 0.9(12)                    | 29.7(12)                   | -16.4(13)                  |
| C10         | 70.7(14)                   | 41.8(11)                   | 72.8(15)                   | -2.6(10)                   | 34.8(12)                   | -3.2(10)                   |
| C11         | 51.3(12)                   | 51.6(12)                   | 70.4(14)                   | 11.3(11)                   | 17.1(11)                   | -0.9(9)                    |
| C12         | 77.4(16)                   | 60.1(14)                   | 83.4(17)                   | 10.4(13)                   | 37.6(13)                   | 2.7(12)                    |
| C13         | 88(2)                      | 97(2)                      | 94(2)                      | 26.6(16)                   | 47.9(16)                   | 13.3(16)                   |
| C14         | 74.5(19)                   | 116(3)                     | 115(3)                     | 47(2)                      | 38.5(18)                   | -2.6(18)                   |
| C15         | 62.7(16)                   | 87(2)                      | 109(2)                     | 32.3(18)                   | 6.7(16)                    | -24.8(14)                  |
| C16         | 57.8(14)                   | 65.9(14)                   | 76.7(15)                   | 14.8(12)                   | 2.6(12)                    | -11.4(11)                  |
| C17         | 81.3(16)                   | 37.3(11)                   | 68.7(14)                   | 2.1(10)                    | 41.1(12)                   | -1.2(10)                   |
| C18         | 112(2)                     | 67.9(18)                   | 115(2)                     | 14.7(17)                   | 8(2)                       | 1.1(16)                    |

**Table 4 Bond Lengths for 3a.**

| Atom | Atom | Length/Å | Atom | Atom | Length/Å |
|------|------|----------|------|------|----------|
| O1   | C17  | 1.237(2) | C4   | C5   | 1.401(3) |
| N1   | C6   | 1.370(3) | C5   | C6   | 1.410(3) |
| N1   | C7   | 1.364(3) | C5   | C8   | 1.432(3) |
| N1   | C9   | 1.447(3) | C7   | C8   | 1.363(3) |
| N2   | C10  | 1.448(3) | C8   | C10  | 1.504(3) |
| N2   | C11  | 1.385(3) | C10  | C17  | 1.519(3) |
| N3   | C17  | 1.323(3) | C11  | C12  | 1.385(3) |
| N3   | C18  | 1.444(3) | C11  | C16  | 1.393(3) |
| C1   | C2   | 1.366(4) | C12  | C13  | 1.383(3) |
| C1   | C6   | 1.393(3) | C13  | C14  | 1.354(4) |
| C2   | C3   | 1.385(4) | C14  | C15  | 1.377(4) |
| C3   | C4   | 1.372(4) | C15  | C16  | 1.381(4) |

**Table 5 Bond Angles for 3a.**

| Atom | Atom | Atom | Angle/°    | Atom | Atom | Atom | Angle/°    |
|------|------|------|------------|------|------|------|------------|
| C6   | N1   | C9   | 126.13(19) | C7   | C8   | C5   | 106.42(19) |
| C7   | N1   | C6   | 108.35(18) | C7   | C8   | C10  | 126.9(2)   |
| C7   | N1   | C9   | 125.44(19) | N2   | C10  | C8   | 110.72(18) |
| C11  | N2   | C10  | 122.82(18) | N2   | C10  | C17  | 115.21(18) |
| C17  | N3   | C18  | 122.8(2)   | C8   | C10  | C17  | 109.28(18) |
| C2   | C1   | C6   | 117.3(3)   | N2   | C11  | C12  | 122.7(2)   |
| C1   | C2   | C3   | 121.7(3)   | N2   | C11  | C16  | 119.2(2)   |
| C4   | C3   | C2   | 121.6(3)   | C12  | C11  | C16  | 118.0(2)   |
| C3   | C4   | C5   | 118.5(3)   | C13  | C12  | C11  | 120.8(2)   |
| C4   | C5   | C6   | 118.7(2)   | C14  | C13  | C12  | 120.8(3)   |
| C4   | C5   | C8   | 134.9(2)   | C13  | C14  | C15  | 119.3(3)   |
| C6   | C5   | C8   | 106.44(19) | C14  | C15  | C16  | 120.9(3)   |
| N1   | C6   | C1   | 129.8(2)   | C15  | C16  | C11  | 120.1(3)   |
| N1   | C6   | C5   | 108.13(19) | O1   | C17  | N3   | 123.0(2)   |
| C1   | C6   | C5   | 122.0(2)   | O1   | C17  | C10  | 120.06(19) |
| C8   | C7   | N1   | 110.7(2)   | N3   | C17  | C10  | 116.86(19) |
| C5   | C8   | C10  | 126.6(2)   |      |      |      |            |

**Table 6 Torsion Angles for 3a.**

| <b>A</b> | <b>B</b> | <b>C</b> | <b>D</b> | <b>Angle/°</b> | <b>A</b> | <b>B</b> | <b>C</b> | <b>D</b> | <b>Angle/°</b> |
|----------|----------|----------|----------|----------------|----------|----------|----------|----------|----------------|
| N1       | C7       | C8       | C5       | 0.4(2)         | C7       | N1       | C6       | C5       | -0.9(2)        |
| N1       | C7       | C8       | C10      | 178.53(18)     | C7       | C8       | C10      | N2       | 123.1(2)       |
| N2       | C10      | C17      | O1       | 156.83(19)     | C7       | C8       | C10      | C17      | -4.8(3)        |
| N2       | C10      | C17      | N3       | -26.2(3)       | C8       | C5       | C6       | N1       | 1.1(2)         |
| N2       | C11      | C12      | C13      | -176.3(2)      | C8       | C5       | C6       | C1       | -177.5(2)      |
| N2       | C11      | C16      | C15      | 177.1(2)       | C8       | C10      | C17      | O1       | -77.8(2)       |
| C1       | C2       | C3       | C4       | 2.4(5)         | C8       | C10      | C17      | N3       | 99.2(2)        |
| C2       | C1       | C6       | N1       | 180.0(2)       | C9       | N1       | C6       | C1       | -5.7(4)        |
| C2       | C1       | C6       | C5       | -1.7(3)        | C9       | N1       | C6       | C5       | 175.9(2)       |
| C2       | C3       | C4       | C5       | -1.5(4)        | C9       | N1       | C7       | C8       | -176.5(2)      |
| C3       | C4       | C5       | C6       | -0.8(3)        | C10      | N2       | C11      | C12      | -3.3(3)        |
| C3       | C4       | C5       | C8       | 179.2(2)       | C10      | N2       | C11      | C16      | 178.6(2)       |
| C4       | C5       | C6       | N1       | -178.91(19)    | C11      | N2       | C10      | C8       | 162.5(2)       |
| C4       | C5       | C6       | C1       | 2.5(3)         | C11      | N2       | C10      | C17      | -72.9(3)       |
| C4       | C5       | C8       | C7       | 179.1(2)       | C11      | C12      | C13      | C14      | -1.0(4)        |
| C4       | C5       | C8       | C10      | 1.0(4)         | C12      | C11      | C16      | C15      | -1.1(3)        |
| C5       | C8       | C10      | N2       | -59.2(3)       | C12      | C13      | C14      | C15      | -0.8(5)        |
| C5       | C8       | C10      | C17      | 172.90(19)     | C13      | C14      | C15      | C16      | 1.5(4)         |
| C6       | N1       | C7       | C8       | 0.3(2)         | C14      | C15      | C16      | C11      | -0.6(4)        |
| C6       | C1       | C2       | C3       | -0.7(4)        | C16      | C11      | C12      | C13      | 1.9(3)         |
| C6       | C5       | C8       | C7       | -0.9(2)        | C18      | N3       | C17      | O1       | -1.4(4)        |
| C6       | C5       | C8       | C10      | -179.05(19)    | C18      | N3       | C17      | C10      | -178.3(2)      |
| C7       | N1       | C6       | C1       | 177.6(2)       |          |          |          |          |                |

**Table 7 Hydrogen Atom Coordinates ( $\text{\AA}\times 10^4$ ) and Isotropic Displacement Parameters ( $\text{\AA}^2\times 10^3$ ) for 3a.**

| <b>Atom</b> | <b>x</b> | <b>y</b> | <b>z</b> | <b>U(eq)</b> |
|-------------|----------|----------|----------|--------------|
| H2          | 2053.93  | 11100.34 | 3309.39  | 83           |
| H3          | -162.75  | 11002.43 | 2130.4   | 90           |
| H1          | 1270.98  | 8126.77  | 6147.26  | 87           |
| H2A         | 3580.76  | 8380.38  | 6608.2   | 110          |
| H3A         | 4897.52  | 8787.28  | 5745.74  | 112          |
| H4          | 3949.36  | 9106.22  | 4397.5   | 91           |
| H7          | -979.27  | 8644.15  | 3355.63  | 70           |
| H9A         | -2045.27 | 8400.21  | 4551.09  | 108          |
| H9B         | -1060.92 | 8260.49  | 5409.62  | 108          |
| H9C         | -1337.56 | 6985.62  | 4832.18  | 108          |
| H10         | 2054.53  | 8507.83  | 2816.96  | 71           |
| H12         | 2633.56  | 9181.79  | 1743.09  | 85           |
| H13         | 3998.21  | 9829.01  | 938.8    | 106          |
| H14         | 5024.25  | 11939.49 | 1087.81  | 119          |
| H15         | 4652.17  | 13453.82 | 2036     | 107          |
| H16         | 3330.84  | 12821.3  | 2869.99  | 84           |
| H18A        | -1552.92 | 10660.76 | 816.36   | 153          |
| H18B        | -2401.24 | 10769.67 | 1448.42  | 153          |
| H18C        | -2038.95 | 9317.93  | 1162.97  | 153          |

## 4. Characterization data of products

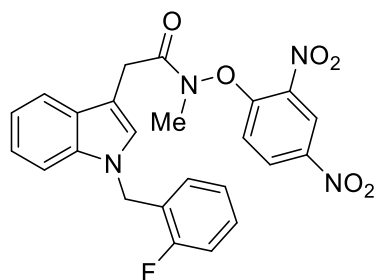

***N*-(2,4-dinitrophenoxy)-2-(1-(2-fluorobenzyl)-1*H*-indol-3-yl)-*N*-methylacetamide (1e):** Yellow solid (216.8 mg, 43% yield);  $R_f = 0.50$  (PE:EA = 2:1);  $^1\text{H NMR}$  (500 MHz,  $\text{CDCl}_3$ )  $\delta$  8.55 (d,  $J = 2.7$  Hz, 1H), 7.70 (dd,  $J = 9.3, 2.7$  Hz, 1H), 7.45 (d,  $J = 7.9$  Hz, 1H), 7.31 – 7.27 (m, 1H), 7.15 (d,  $J = 7.8$  Hz, 1H), 7.13 (d,  $J = 6.8$  Hz, 1H), 7.10 (d,  $J = 8.5$  Hz, 1H), 7.06 (d,  $J = 7.6$  Hz, 1H), 7.05 – 7.03 (m, 1H), 6.97 (t,  $J = 6.7$  Hz, 1H), 6.94 (s, 1H), 6.79 (d,  $J = 9.3$  Hz, 1H), 5.09 (s, 2H), 3.99 (s, 2H), 3.33 (s, 3H).  $^{13}\text{C NMR}$  (126 MHz,  $\text{CDCl}_3$ )  $\delta$  176.2, 160.6 (d,  $J = 246.9$  Hz), 156.0, 141.6, 136.1, 130.2 (d,  $J = 7.9$  Hz), 129.8 (d,  $J = 3.7$  Hz), 128.5, 127.5, 126.8, 124.7 (d,  $J = 3.7$  Hz), 124.0 (d,  $J = 14.8$  Hz), 122.5, 121.8, 120.1, 118.8, 115.9, 115.7, 114.3, 109.5, 106.9, 43.7 (d,  $J = 4.6$  Hz), 36.3, 31.7.  $^{19}\text{F NMR}$  (471 MHz,  $\text{CDCl}_3$ )  $\delta$  -117.9. HRMS (ESI): calcd for  $\text{C}_{24}\text{H}_{19}\text{N}_4\text{O}_6\text{FNa}$  [ $\text{M} + \text{Na}$ ] $^+$ : 501.1181, Found:501.1184.

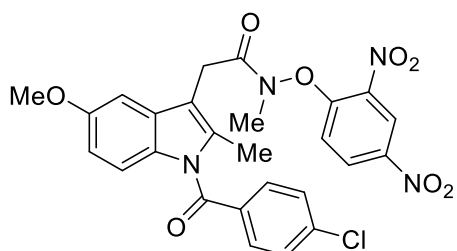

**2-(1-(4-chlorobenzoyl)-5-methoxy-2-methyl-1*H*-indol-3-yl)-*N*-(2,4-dinitrophenoxy)-*N*-methylacetamide (1f):** Yellow solid (306.1 mg, 44% yield);  $R_f = 0.41$  (PE:EA = 2:1);  $^1\text{H NMR}$  (500 MHz,  $\text{CDCl}_3$ )  $\delta$  8.63 (d,  $J = 2.2$  Hz, 1H), 8.02 (dd,  $J = 9.2, 2.3$  Hz, 1H), 7.54 (d,  $J = 8.1$  Hz, 2H), 7.44 (d,  $J = 8.0$  Hz, 2H), 6.91 (d,  $J = 9.2$  Hz, 1H), 6.80 (d,  $J = 2.4$  Hz, 1H), 6.54 (dd,  $J = 9.1, 2.5$  Hz, 1H), 6.30 (d,  $J = 9.0$  Hz, 1H), 3.91 (s, 2H), 3.79 (s, 3H), 3.35 (s, 3H), 2.31 (s, 3H).  $^{13}\text{C NMR}$  (126 MHz,  $\text{CDCl}_3$ )  $\delta$  175.4, 168.1, 156.1, 155.9, 142.0, 140.0, 136.5, 135.8, 133.2, 131.3, 130.2, 130.0, 129.5, 129.0, 122.0, 114.4, 114.3, 112.0, 111.6, 100.8, 55.7, 36.3, 31.3, 13.2. HRMS (ESI): calcd for  $\text{C}_{26}\text{H}_{21}\text{N}_4\text{O}_8\text{ClNa}$  [ $\text{M} + \text{Na}$ ] $^+$ : 575.0940, Found: 575.0941.

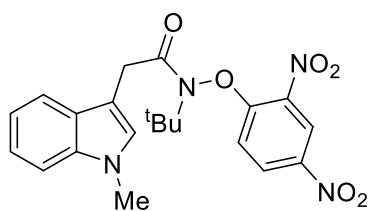

***N*-(*tert*-butyl)-*N*-(2,4-dinitrophenoxy)-2-(1-methyl-1*H*-indol-3-yl)acetamide (1g):** Yellow solid (120.0 mg, 55% yield);  $R_f = 0.50$  (PE:EA = 4:1);  $^1\text{H NMR}$  (500 MHz,  $\text{CDCl}_3$ )  $\delta$  8.60 (d,  $J = 2.7$  Hz, 1H), 7.91 (dd,  $J = 9.3, 2.7$  Hz, 1H), 7.35 (d,  $J = 7.9$  Hz, 1H), 7.17 – 7.13 (m, 2H), 7.07 (d,  $J = 8.2$  Hz, 1H), 7.02 (t,  $J = 7.4$  Hz, 1H), 6.75 (s, 1H), 3.89 (d,  $J = 15.4$  Hz, 1H), 3.76 (d,  $J = 15.7$  Hz, 1H), 3.60 (s, 3H), 1.46 (s, 9H).  $^{13}\text{C NMR}$  (126 MHz,  $\text{CDCl}_3$ )  $\delta$  178.4, 158.3, 141.3, 136.6, 135.5, 128.0, 127.6, 127.4, 122.2, 121.4, 119.7, 118.6, 115.6, 109.2, 106.1, 65.7, 33.9, 32.7, 27.7. HRMS (ESI): calcd for  $\text{C}_{21}\text{H}_{22}\text{N}_4\text{O}_6\text{Na}$  [ $\text{M} + \text{Na}$ ] $^+$ : 449.1432, Found:449.1434.

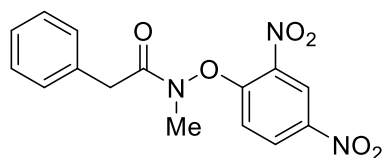

***N*-(2,4-dinitrophenoxy)-*N*-methyl-2-phenylacetamide (1i):** Yellow solid (66.2 mg, 17% yield);  $R_f = 0.50$  (PE:EA = 3:1);  $^1\text{H NMR}$  (500 MHz,  $\text{CDCl}_3$ )  $\delta$  8.81 (d,  $J = 2.6$  Hz, 1H), 8.19 (dd,  $J = 9.3, 2.7$  Hz, 1H), 7.11 – 7.10 (m, 5H), 7.06 (d,  $J = 9.3$  Hz, 1H), 3.87 (s, 2H), 3.34 (s, 3H).  $^{13}\text{C NMR}$  (126 MHz,  $\text{CDCl}_3$ )  $\delta$  175.7, 155.9, 142.0, 136.6, 133.0, 129.3, 129.1, 128.8, 127.4, 122.3, 114.9, 41.2, 36.3. HRMS (ESI): calcd for  $\text{C}_{15}\text{H}_{13}\text{N}_3\text{O}_6\text{Na}$  [ $\text{M} + \text{Na}$ ] $^+$ : 354.0697, Found:354.0700.

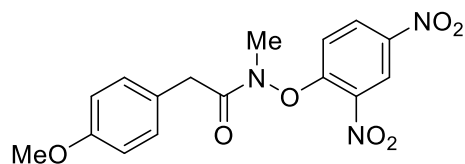

***N*-(2,4-dinitrophenoxy)-2-(4-methoxyphenyl)-*N*-methylacetamide (1j):** Yellow solid (118.4 mg, 34% yield);  $R_f = 0.44$  (PE:EA = 3:1);  $^1\text{H NMR}$  (500 MHz,  $\text{CDCl}_3$ )  $\delta$  8.81 (d,  $J = 2.7$  Hz, 1H), 8.24 (dd,  $J = 9.2, 2.7$  Hz, 1H), 7.12 (d,  $J = 9.3$  Hz, 1H), 7.01 (d,  $J = 8.3$  Hz, 2H), 6.65 (d,  $J = 8.2$  Hz, 2H), 3.79 (s, 2H), 3.67 (s, 3H), 3.34 (s, 3H).  $^{13}\text{C NMR}$  (126 MHz,  $\text{CDCl}_3$ )  $\delta$  176.1, 158.9, 156.1, 142.1, 136.7, 130.2, 129.3, 124.9, 122.2, 115.0, 114.1, 55.3, 40.1, 36.3. HRMS (ESI): calcd for  $\text{C}_{16}\text{H}_{15}\text{N}_3\text{O}_7\text{Na}$  [ $\text{M} + \text{Na}$ ] $^+$ : 384.0802, Found:384.0807.

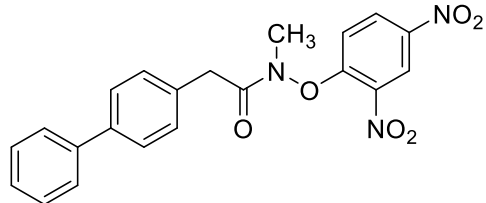

**2-([1,1'-biphenyl]-4-yl)-*N*-(2,4-dinitrophenoxy)-*N*-methylacetamide (1k):** Yellow solid (101.8 mg, 25% yield);  $R_f = 0.52$  (PE:EA = 3:1);  $^1\text{H NMR}$  (500 MHz,  $\text{CDCl}_3$ )  $\delta$  8.81 (d,  $J = 2.6$  Hz, 1H), 8.19 (dd,  $J = 9.3, 2.7$  Hz, 1H), 7.40 – 7.39 (m, 4H), 7.35 – 7.33 (m, 3H), 7.18 (d,  $J = 8.1$  Hz, 2H), 7.13 (d,  $J = 9.3$  Hz, 1H), 3.91 (s, 2H), 3.37 (s, 3H).  $^{13}\text{C NMR}$  (126 MHz,  $\text{CDCl}_3$ )  $\delta$  175.8, 155.9, 142.1, 140.5, 140.3, 136.7, 131.9, 129.6, 129.3, 129.0, 127.6, 127.5, 126.9, 122.2, 115.0, 40.9, 36.3. HRMS (ESI): calcd for  $\text{C}_{21}\text{H}_{17}\text{N}_3\text{O}_6\text{Na}$  [ $\text{M} + \text{Na}$ ] $^+$ : 430.1010, Found:430.1012.

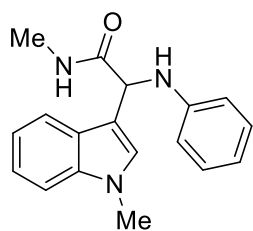

***N*-methyl-2-(1-methyl-1*H*-indol-3-yl)-2-(phenylamino)acetamide (3a):** White solid (53.4 mg, 94% yield);  $R_f = 0.50$  (PE:EA = 1:1);  $^1\text{H NMR}$  (500 MHz,  $\text{CDCl}_3$ )  $\delta$  7.61 (d,  $J = 7.9$  Hz, 1H), 7.34 (d,  $J = 8.2$  Hz, 1H), 7.28 (t,  $J = 7.3$  Hz, 1H), 7.22 (t,  $J = 7.8$  Hz, 2H), 7.14 (t,  $J = 7.4$  Hz, 1H), 7.11 (s, 1H), 7.05-7.04 (m, 1H), 6.83 (t,  $J = 7.3$  Hz, 1H), 6.67 (d,  $J = 8.0$  Hz, 2H), 5.07 (s, 1H), 4.48 (brs, 1H), 3.77 (s, 3H), 2.89 (d,  $J = 5.0$  Hz, 3H).  $^{13}\text{C NMR}$  (126 MHz,  $\text{CDCl}_3$ )  $\delta$  172.6, 147.3, 137.4, 129.5, 127.8, 126.3, 122.4, 119.9, 119.2, 119.1, 113.9, 112.0, 109.9, 57.5, 33.0, 26.5. HRMS (APCI): calcd for  $\text{C}_{18}\text{H}_{18}\text{N}_3\text{O}$  [ $\text{M} - \text{H}$ ] $^-$ : 292.1455, Found: 292.1458.

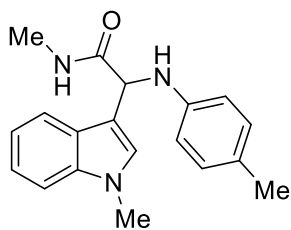

***N*-methyl-2-(1-methyl-1*H*-indol-3-yl)-2-(*p*-tolylamino)acetamide (3b):** White solid (49.5 mg, 81% yield);  $R_f = 0.47$  (PE:EA = 1:1);  $^1\text{H NMR}$  (500 MHz,  $\text{CDCl}_3$ )  $\delta$  7.62 (d,  $J = 8.0$  Hz, 1H), 7.34 (d,  $J = 8.2$  Hz, 1H), 7.28 (d,  $J = 7.2$  Hz, 1H), 7.14 (t,  $J = 7.5$  Hz, 1H), 7.12 – 7.11 (m, 2H), 7.05 (d,  $J = 7.9$  Hz, 2H), 6.60 (d,  $J = 7.9$  Hz, 2H), 5.05 (s, 1H), 4.38 (s, 1H), 3.76 (s, 3H), 2.89 (d,  $J = 5.0$  Hz, 3H), 2.29 (s, 3H).  $\delta$   $^{13}\text{C NMR}$  (126 MHz,  $\text{CDCl}_3$ )  $\delta$  172.8, 145.1, 137.5, 130.0, 128.5, 127.7, 126.4, 122.3, 119.9, 119.1, 114.0, 112.3, 109.8, 57.8, 32.9, 26.4, 20.5. HRMS (APCI): calcd for  $\text{C}_{19}\text{H}_{20}\text{N}_3\text{O}$  [ $\text{M} - \text{H}$ ] $^-$ : 306.1612, Found: 306.1615.

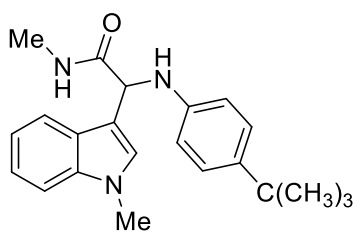

**2-((4-(*tert*-butyl)phenyl)amino)-*N*-methyl-2-(1-methyl-1*H*-indol-3-yl)acetamide (3c):** Light yellow solid (59.8 mg, 86% yield);  $R_f = 0.48$  (PE:EA = 1:1);  $^1\text{H NMR}$  (500 MHz,  $\text{CDCl}_3$ )  $\delta$  7.60 (d,  $J = 7.9$  Hz, 1H), 7.31 (d,  $J = 8.2$  Hz, 1H), 7.24 – 7.23 (m, 3H), 7.13 – 7.09 (m, 2H), 7.08 (s, 1H), 6.61 (d,  $J = 8.2$  Hz, 2H), 5.03 (s, 1H), 4.38 (s, 1H), 3.74 (s, 3H), 2.86 (d,  $J = 4.9$  Hz, 3H), 1.28 (s, 9H).  $^{13}\text{C NMR}$  (126 MHz,  $\text{CDCl}_3$ )  $\delta$  172.8, 145.0, 142.1, 137.5, 127.8, 126.3, 126.3, 122.3,



119.9, 119.2, 113.6, 112.3, 109.8, 57.8, 34.1, 32.9, 31.6, 26.4. HRMS (APCI): calcd for C<sub>22</sub>H<sub>26</sub>N<sub>3</sub>O [M - H]<sup>-</sup>: 348.2081, Found: 348.2082.

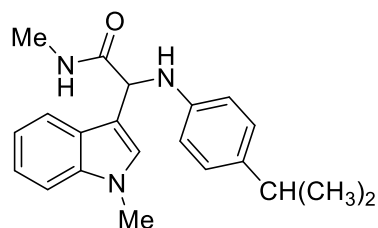

**2-((4-isopropylphenyl)amino)-N-methyl-2-(1-methyl-1H-indol-3-yl)acetamide (3d):** White solid (65.5 mg, 97% yield); R<sub>f</sub> = 0.51 (PE:EA = 1:1); <sup>1</sup>H NMR (500 MHz, CDCl<sub>3</sub>) δ 7.61 (d, *J* = 7.9 Hz, 1H), 7.33 (d, *J* = 8.2 Hz, 1H), 7.27 (t, *J* = 7.6 Hz, 1H), 7.18 (d, *J* = 5.0 Hz, 1H), 7.13 (t, *J* = 7.5 Hz, 1H), 7.12 – 7.09 (m, 3H), 6.62 (d, *J* = 8.2 Hz, 2H), 5.03 (s, 1H), 4.36 (s, 1H), 3.76 (s, 3H), 2.89 (d, *J* = 5.0 Hz, 3H), 2.87 – 2.81 (m, 1H), 1.23 (d, *J* = 6.9 Hz, 6H). <sup>13</sup>C NMR (126 MHz, CDCl<sub>3</sub>) δ 172.8, 145.3, 139.9, 137.4, 127.8, 127.4, 126.3, 122.3, 119.9, 119.1, 113.9, 112.2, 109.8, 57.9, 33.3, 33.0, 26.4, 24.3, 24.3. HRMS (APCI): calcd for C<sub>21</sub>H<sub>24</sub>N<sub>3</sub>O [M - H]<sup>-</sup>: 334.1925, Found: 334.1927.

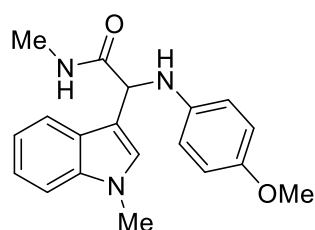

**2-((4-methoxyphenyl)amino)-N-methyl-2-(1-methyl-1H-indol-3-yl)acetamide (3e):** White solid (56.2 mg, 87% yield); R<sub>f</sub> = 0.44 (PE:EA = 1:1); <sup>1</sup>H NMR (500 MHz, CDCl<sub>3</sub>) δ 7.61 (d, *J* = 7.9 Hz, 1H), 7.33 (d, *J* = 8.2 Hz, 1H), 7.26 (t, *J* = 7.6 Hz, 1H), 7.15 – 7.12 (m, 2H), 7.09 (s, 1H), 6.80 (d, *J* = 8.6 Hz, 2H), 6.62 (d, *J* = 8.6 Hz, 2H), 4.99 (s, 1H), 4.26 (s, 1H), 3.76 (s, 6H), 2.88 (d, *J* = 4.9 Hz, 3H). <sup>13</sup>C NMR (126 MHz, CDCl<sub>3</sub>) δ 172.9, 153.3, 141.5, 137.5, 127.7, 126.4, 122.3, 119.9, 119.1, 115.1, 115.0, 112.4, 109.8, 58.3, 55.9, 32.9, 26.4. HRMS (APCI): calcd for C<sub>19</sub>H<sub>20</sub>N<sub>3</sub>O<sub>2</sub> [M - H]<sup>-</sup>: 322.1561, Found: 322.1565.

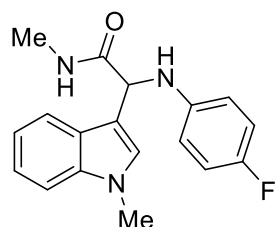

**2-((4-fluorophenyl)amino)-N-methyl-2-(1-methyl-1H-indol-3-yl)acetamide (3f):** White solid (59.1 mg, 95% yield); R<sub>f</sub> = 0.50 (PE:EA = 1:1); <sup>1</sup>H NMR (500 MHz, CDCl<sub>3</sub>) δ 7.61 (d, *J* = 8.0 Hz, 1H), 7.34 (d, *J* = 8.2 Hz, 1H), 7.28 (t, *J* = 7.2 Hz, 1H), 7.15 (t, *J* = 7.5 Hz, 1H), 7.11 (s, 1H), 6.94 – 6.89 (m, 3H), 6.60 – 6.58 (m, 2H), 5.00 (s, 1H), 4.49 (brs, 1H), 3.76 (s, 3H), 2.87 (d, *J* = 5.0 Hz, 3H). <sup>13</sup>C NMR (126 MHz, CDCl<sub>3</sub>) δ 172.5, 156.8 (d, *J* = 238.4 Hz), 143.7, 137.5, 127.8, 126.2, 122.4, 120.0, 119.0, 116.0 (d, *J* = 22.7 Hz), 114.8 (d, *J* = 7.9 Hz), 111.9, 109.9, 57.8, 33.0, 26.5. HRMS (APCI): calcd for C<sub>18</sub>H<sub>17</sub>N<sub>3</sub>OF [M - H]<sup>-</sup>: 310.1361, Found: 310.1363.

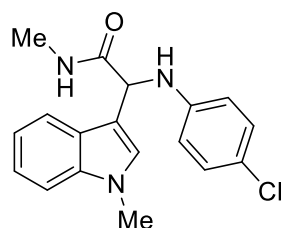

**2-((4-chlorophenyl)amino)-N-methyl-2-(1-methyl-1H-indol-3-yl)acetamide (3g):** Light yellow solid (51.0 mg, 78% yield); R<sub>f</sub> = 0.46 (PE:EA = 1:1); <sup>1</sup>H NMR (500 MHz, CDCl<sub>3</sub>) δ 7.60 (d, *J* = 7.9 Hz, 1H), 7.34 (d, *J* = 8.2 Hz, 1H), 7.29 (d, *J* = 8.2 Hz, 1H), 7.17 – 7.12 (m, 3H), 7.10 (s, 1H), 6.79 (d, *J* = 5.1 Hz, 1H), 6.57 (d, *J* = 8.8 Hz, 2H), 5.03 (s, 1H), 4.65 (brs, 1H), 3.76 (s, 3H), 2.86 (d, *J* = 4.9 Hz, 3H). <sup>13</sup>C NMR (126 MHz, CDCl<sub>3</sub>) δ 172.3, 145.8, 137.4, 129.2, 127.8, 126.2, 123.6, 122.4, 120.0, 118.9, 114.9, 111.6, 109.9, 57.0, 32.9, 26.5. HRMS (APCI): calcd for C<sub>18</sub>H<sub>17</sub>N<sub>3</sub>OCl [M - H]<sup>-</sup>: 326.1066, Found: 326.1068.

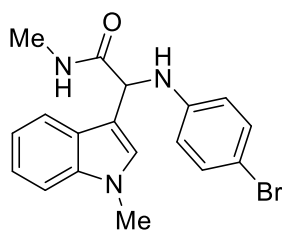

**2-((4-bromophenyl)amino)-*N*-methyl-2-(1-methyl-1*H*-indol-3-yl)acetamide (3h):** White solid (59.3 mg, 80% yield);  $R_f = 0.46$  (PE:EA = 1:1);  $^1\text{H NMR}$  (500 MHz,  $\text{CDCl}_3$ )  $\delta$  7.59 (d,  $J = 7.9$  Hz, 1H), 7.33 (d,  $J = 8.2$  Hz, 1H), 7.28 (d,  $J = 7.6$  Hz, 1H), 7.25 (d,  $J = 4.5$  Hz, 2H), 7.14 (t,  $J = 7.5$  Hz, 1H), 7.09 (s, 1H), 6.73 (d,  $J = 5.1$  Hz, 1H), 6.52 (d,  $J = 8.7$  Hz, 2H), 5.02 (s, 1H), 4.69 (s, 1H), 3.75 (s, 3H), 2.84 (d,  $J = 4.9$  Hz, 3H).  $^{13}\text{C NMR}$  (126 MHz,  $\text{CDCl}_3$ )  $\delta$  172.2, 146.2, 137.5, 132.2, 127.8, 126.2, 122.5, 120.1, 118.9, 115.5, 111.6, 110.8, 110.0, 56.9, 33.0, 26.5. HRMS (APCI): calcd for  $\text{C}_{18}\text{H}_{17}\text{N}_3\text{OBr}$  [ $\text{M} - \text{H}$ ] $^-$ : 370.0560, Found: 370.0562.

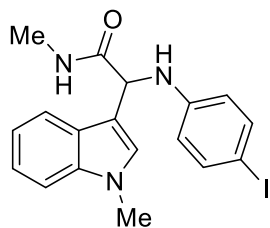

**2-((4-iodophenyl)amino)-*N*-methyl-2-(1-methyl-1*H*-indol-3-yl)acetamide (3i):** White solid (66.4 mg, 79% yield);  $R_f = 0.38$  (PE:EA = 1:1);  $^1\text{H NMR}$  (500 MHz,  $\text{CDCl}_3$ )  $\delta$  7.60 (d,  $J = 8.0$  Hz, 1H), 7.43 (d,  $J = 8.3$  Hz, 2H), 7.34 (d,  $J = 8.2$  Hz, 1H), 7.28 (t,  $J = 7.4$  Hz, 1H), 7.15 (t,  $J = 7.5$  Hz, 1H), 7.10 (s, 1H), 6.69 (d,  $J = 5.3$  Hz, 1H), 6.43 (d,  $J = 8.4$  Hz, 2H), 5.03 (s, 1H), 4.71 (s, 1H), 3.76 (s, 3H), 2.85 (d,  $J = 4.9$  Hz, 3H).  $^{13}\text{C NMR}$  (126 MHz,  $\text{CDCl}_3$ )  $\delta$  172.1, 146.9, 138.1, 137.5, 127.9, 126.2, 122.5, 120.1, 118.9, 116.1, 111.7, 110.0, 80.1, 56.8, 33.0, 26.5. HRMS (APCI): calcd for  $\text{C}_{18}\text{H}_{17}\text{N}_3\text{OI}$  [ $\text{M} - \text{H}$ ] $^-$ : 418.0422, Found: 418.0425.

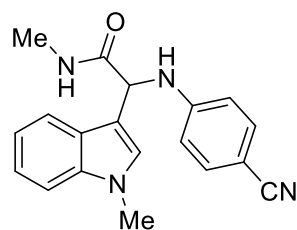

**2-((4-cyanophenyl)amino)-*N*-methyl-2-(1-methyl-1*H*-indol-3-yl)acetamide (3j):** White solid (45.7 mg, 72% yield);  $R_f = 0.38$  (PE:EA = 1:1);  $^1\text{H NMR}$  (500 MHz,  $\text{DMSO}-d_6$ )  $\delta$  8.15 – 8.12 (m, 1H), 7.70 (d,  $J = 8.0$  Hz, 1H), 7.45 (d,  $J = 8.6$  Hz, 2H), 7.41 (d,  $J = 8.2$  Hz, 1H), 7.36 (s, 1H), 7.16 (t,  $J = 7.6$  Hz, 1H), 7.08 (d,  $J = 6.6$  Hz, 1H), 7.03 (t,  $J = 7.5$  Hz, 1H), 6.76 (d,  $J = 8.5$  Hz, 2H), 5.24 (d,  $J = 6.3$  Hz, 1H), 3.76 (s, 3H), 2.61 (d,  $J = 4.5$  Hz, 3H).  $^{13}\text{C NMR}$  (126 MHz,  $\text{DMSO}-d_6$ )  $\delta$  170.9, 151.2, 136.6, 133.2, 128.5, 126.1, 121.4, 120.5, 119.4, 118.9, 112.6, 110.9, 109.8, 96.4, 53.5, 32.4, 25.7. HRMS (APCI): calcd for  $\text{C}_{19}\text{H}_{17}\text{N}_4\text{O}$  [ $\text{M} - \text{H}$ ] $^-$ : 317.1408, Found: 317.1411.

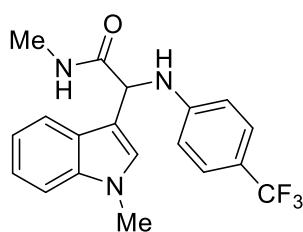

***N*-methyl-2-(1-methyl-1*H*-indol-3-yl)-2-((4-(trifluoromethyl)phenyl)amino)acetamide (3k):** Light yellow solid (42.1 mg, 58% yield);  $R_f = 0.34$  (PE:EA = 1:1);  $^1\text{H NMR}$  (500 MHz,  $\text{CDCl}_3$ )  $\delta$  7.62 (d,  $J = 7.9$  Hz, 1H), 7.40 (d,  $J = 8.3$  Hz, 2H), 7.35 (d,  $J = 8.2$  Hz, 1H), 7.29 (t,  $J = 7.6$  Hz, 1H), 7.17 (t,  $J = 7.5$  Hz, 1H), 7.12 (s, 1H), 6.66 (d,  $J = 8.4$  Hz, 2H), 6.50 (d,  $J = 5.2$  Hz, 1H), 5.13 (s, 2H), 3.77 (s, 3H), 2.85 (d,  $J = 4.9$  Hz, 3H).  $^{13}\text{C NMR}$  (126 MHz,  $\text{CDCl}_3$ )  $\delta$  171.8, 149.7, 137.6, 127.9, 126.8 (q,  $J = 3.7$  Hz), 126.2, 124.9 (q,  $J = 270.3$  Hz), 122.6, 120.5 (q,  $J = 32.6$  Hz), 120.2, 118.8, 113.2, 111.4, 110.0, 56.1, 33.1, 26.6.  $^{19}\text{F NMR}$  (471 MHz,  $\text{CDCl}_3$ )  $\delta$  -61.2. HRMS (APCI): calcd for  $\text{C}_{19}\text{H}_{17}\text{N}_3\text{OF}_3$  [ $\text{M} - \text{H}$ ] $^-$ : 360.1329, Found: 360.1331.

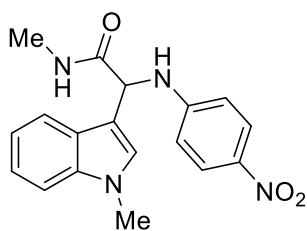

***N*-methyl-2-(1-methyl-1*H*-indol-3-yl)-2-((4-nitrophenyl) amino) acetamide (3l):** Yellow solid (42.1 mg, 62% yield);  $R_f = 0.29$  (PE:EA = 1:1);  $^1\text{H NMR}$  (500 MHz,  $\text{CDCl}_3$ )  $\delta$  7.99 (d,  $J = 8.9$  Hz, 2H), 7.64 (d,  $J = 7.9$  Hz, 1H), 7.35 (d,  $J = 8.2$  Hz, 1H), 7.29 (t,  $J = 7.6$  Hz, 1H), 7.18 (t,  $J = 7.5$  Hz, 1H), 7.14 (s, 1H), 6.57 (d,  $J = 8.8$  Hz, 2H), 6.11 (d,  $J = 5.0$  Hz, 1H), 5.95 (d,  $J = 3.6$  Hz, 1H), 5.21 (s, 1H), 3.77 (s, 3H), 2.81 (d,  $J = 4.8$  Hz, 3H).  $^{13}\text{C NMR}$  (126 MHz,  $\text{CDCl}_3$ )  $\delta$  171.1, 152.2, 138.9, 137.6, 128.0, 126.2, 126.0, 122.8, 120.5, 118.6, 112.5, 110.7, 110.2, 54.7, 33.1, 26.9. HRMS (APCI): calcd for  $\text{C}_{18}\text{H}_{17}\text{N}_4\text{O}_3$  [ $\text{M} - \text{H}$ ] $^-$ : 337.1306, Found: 337.1310.

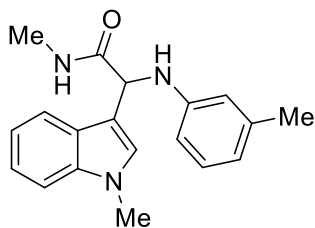

***N*-methyl-2-(1-methyl-1*H*-indol-3-yl)-2-(*m*-tolylamino)acetamide (3m):** White solid (54.4 mg, 89% yield);  $R_f = 0.48$  (PE:EA = 1:1);  $^1\text{H NMR}$  (500 MHz,  $\text{CDCl}_3$ )  $\delta$  7.60 (d,  $J = 8.0$  Hz, 1H), 7.32 (d,  $J = 8.2$  Hz, 1H), 7.26 (t,  $J = 7.2$  Hz, 1H), 7.14 – 7.11 (m, 2H), 7.10 (d,  $J = 7.6$  Hz, 1H), 7.09 (s, 1H), 6.66 (d,  $J = 7.5$  Hz, 1H), 6.49 (s, 1H), 6.47 (d,  $J = 8.0$  Hz, 1H), 5.06 (s, 1H), 4.40 (s, 1H), 3.75 (s, 3H), 2.88 (d,  $J = 4.9$  Hz, 3H), 2.29 (s, 3H).  $^{13}\text{C NMR}$  (126 MHz,  $\text{CDCl}_3$ )  $\delta$  172.7, 147.3, 139.5, 137.4, 129.4, 127.7, 126.3, 122.3, 120.2, 119.9, 119.1, 114.5, 112.1, 111.0, 109.8, 57.5, 32.9, 26.4, 21.7. HRMS (APCI): calcd for  $\text{C}_{19}\text{H}_{20}\text{N}_3\text{O}$  [ $\text{M} - \text{H}$ ] $^-$ : 306.1612, Found: 306.1615.

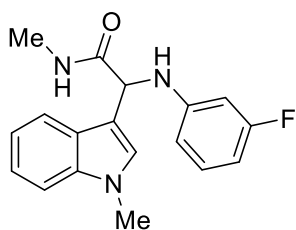

**2-((3-fluorophenyl)amino)-*N*-methyl-2-(1-methyl-1*H*-indol-3-yl) acetamide (3n):** Light yellow solid (56.6 mg, 91% yield);  $R_f = 0.31$  (PE:EA = 1:1);  $^1\text{H NMR}$  (500 MHz,  $\text{CDCl}_3$ )  $\delta$  7.60 (d,  $J = 8.0$  Hz, 1H), 7.32 (d,  $J = 8.2$  Hz, 1H), 7.26 (t,  $J = 7.1$  Hz, 1H), 7.13 (t,  $J = 7.8$  Hz, 1H), 7.10 – 7.07 (m, 2H), 6.71 (d,  $J = 6.4$  Hz, 1H), 6.46 (t,  $J = 8.5$  Hz, 1H), 6.41 (d,  $J = 8.1$  Hz, 1H), 6.33 (d,  $J = 11.3$  Hz, 1H), 5.04 (s, 1H), 4.79 (s, 1H), 3.74 (s, 3H), 2.84 (d,  $J = 4.9$  Hz, 3H).  $^{13}\text{C NMR}$  (126 MHz,  $\text{CDCl}_3$ )  $\delta$  172.1, 164.0 (d,  $J = 245.6$  Hz), 149.1 (d,  $J = 10.3$  Hz), 137.5, 130.5 (d,  $J = 10.0$  Hz), 127.9, 126.2, 122.5, 120.1, 118.9, 111.7, 109.9, 109.6 (d,  $J = 2.8$  Hz), 105.4 (d,  $J = 21.8$  Hz), 100.8 (d,  $J = 26.9$  Hz), 56.8, 33.0, 26.5.  $^{19}\text{F NMR}$  (471 MHz,  $\text{CDCl}_3$ )  $\delta$  -112.3. HRMS (APCI): calcd for  $\text{C}_{18}\text{H}_{17}\text{N}_3\text{OF}$  [ $\text{M} - \text{H}$ ] $^-$ : 310.1361, Found: 310.1363.

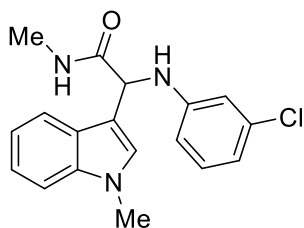

**2-((3-chlorophenyl)amino)-*N*-methyl-2-(1-methyl-1*H*-indol-3-yl) acetamide (3o):** Light yellow solid (52.3 mg, 80% yield);  $R_f = 0.31$  (PE:EA = 1:1);  $^1\text{H NMR}$  (500 MHz,  $\text{CDCl}_3$ )  $\delta$  7.59 (d,  $J = 7.9$  Hz, 1H), 7.32 (d,  $J = 8.2$  Hz, 1H), 7.26 (t,  $J = 7.5$  Hz, 1H), 7.13 (t,  $J = 7.5$  Hz, 1H), 7.09 (s, 1H), 7.06 (d,  $J = 8.0$  Hz, 1H), 6.74 (d,  $J = 8.0$  Hz, 1H), 6.71 (d,  $J = 6.1$  Hz, 1H), 6.63 (s, 1H), 6.50 (d,  $J = 8.2$  Hz, 1H), 5.04 (s, 1H), 4.74 (s, 1H), 3.74 (s, 3H), 2.84 (d,  $J = 4.9$  Hz, 3H).  $^{13}\text{C NMR}$  (126 MHz,  $\text{CDCl}_3$ )  $\delta$  172.1, 148.4, 137.5, 135.2, 130.5, 127.9, 126.2, 122.5, 120.1, 118.9, 118.9, 113.8, 112.0, 111.6, 109.9, 56.7, 33.0, 26.5. HRMS (APCI): calcd for  $\text{C}_{18}\text{H}_{17}\text{N}_3\text{OCl}$  [ $\text{M} - \text{H}$ ] $^-$ : 326.1066, Found: 326.1068.

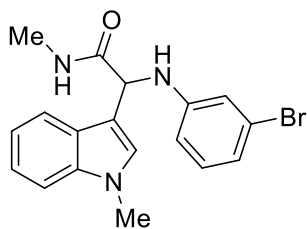

**2-((3-bromophenyl)amino)-N-methyl-2-(1-methyl-1H-indol-3-yl)acetamide (3p):** Light yellow solid (52.3 mg, 80% yield);  $R_f = 0.40$  (PE:EA = 1:1);  $^1\text{H NMR}$  (500 MHz,  $\text{CDCl}_3$ )  $\delta$  7.59 (d,  $J = 8.0$  Hz, 1H), 7.34 (d,  $J = 8.3$  Hz, 1H), 7.28 (t,  $J = 7.3$  Hz, 1H), 7.15 (t,  $J = 7.5$  Hz, 1H), 7.11 (s, 1H), 7.03 (t,  $J = 8.0$  Hz, 1H), 6.91 (d,  $J = 7.9$  Hz, 1H), 6.81 (s, 1H), 6.74 (d,  $J = 5.2$  Hz, 1H), 6.55 (d,  $J = 8.1$  Hz, 1H), 5.05 (s, 1H), 4.72 (s, 1H), 3.77 (s, 3H), 2.87 (d,  $J = 4.9$  Hz, 3H).  $^{13}\text{C NMR}$  (126 MHz,  $\text{CDCl}_3$ )  $\delta$  172.0, 148.5, 137.5, 130.8, 127.9, 126.2, 123.4, 122.5, 121.9, 120.1, 118.9, 116.7, 112.4, 111.6, 110.0, 56.7, 33.0, 26.6. HRMS (APCI): calcd for  $\text{C}_{18}\text{H}_{17}\text{N}_3\text{OBr}$  [ $\text{M} - \text{H}$ ] $^-$ : 370.0560, Found: 370.0562.

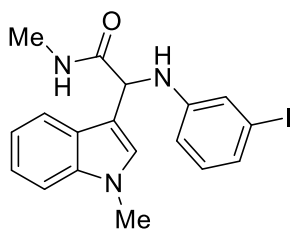

**2-((3-iodophenyl)amino)-N-methyl-2-(1-methyl-1H-indol-3-yl)acetamide (3q):** Light yellow solid (68.1 mg, 81% yield);  $R_f = 0.52$  (PE:EA = 1:1);  $^1\text{H NMR}$  (500 MHz,  $\text{CDCl}_3$ )  $\delta$  7.58 (d,  $J = 8.0$  Hz, 1H), 7.32 (d,  $J = 8.2$  Hz, 1H), 7.26 (t,  $J = 6.8$  Hz, 1H), 7.13 (t,  $J = 7.4$  Hz, 1H), 7.10 (d,  $J = 7.1$  Hz, 1H), 7.08 (s, 1H), 7.00 (s, 1H), 6.87 (t,  $J = 8.0$  Hz, 1H), 6.78 (d,  $J = 5.1$  Hz, 1H), 6.57 (d,  $J = 8.2$  Hz, 1H), 5.02 (s, 1H), 4.66 (s, 1H), 3.74 (s, 3H), 2.84 (d,  $J = 4.9$  Hz, 3H).  $^{13}\text{C NMR}$  (126 MHz,  $\text{CDCl}_3$ )  $\delta$  172.0, 148.4, 137.4, 130.9, 127.9, 127.9, 126.1, 122.6, 122.4, 120.0, 118.9, 112.8, 111.5, 109.9, 95.2, 56.6, 33.0, 26.5. HRMS (APCI): calcd for  $\text{C}_{18}\text{H}_{17}\text{N}_3\text{OI}$  [ $\text{M} - \text{H}$ ] $^-$ : 418.0422, Found: 418.0425.

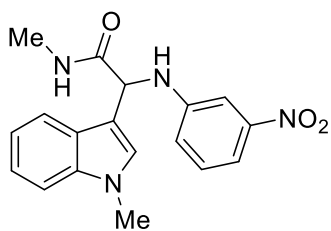

**N-methyl-2-(1-methyl-1H-indol-3-yl)-2-((3-nitrophenyl)amino)acetamide (3r):** Yellow solid (39.2 mg, 58% yield);  $R_f = 0.48$  (PE:EA = 1:1);  $^1\text{H NMR}$  (500 MHz,  $\text{CDCl}_3$ )  $\delta$  7.64 (d,  $J = 7.9$  Hz, 1H), 7.53 (d,  $J = 8.1$  Hz, 1H), 7.46 (t,  $J = 2.4$  Hz, 1H), 7.34 (d,  $J = 8.2$  Hz, 1H), 7.28 (t,  $J = 7.2$  Hz, 1H), 7.24 (d,  $J = 8.1$  Hz, 1H), 7.18 (s, 1H), 7.15 (t,  $J = 7.5$  Hz, 1H), 6.91 (dd,  $J = 8.2, 2.6$  Hz, 1H), 6.40 (d,  $J = 4.9$  Hz, 1H), 5.37 (d,  $J = 3.2$  Hz, 1H), 5.15 (d,  $J = 3.2$  Hz, 1H), 3.77 (s, 3H), 2.83 (d,  $J = 4.9$  Hz, 3H).  $^{13}\text{C NMR}$  (126 MHz,  $\text{CDCl}_3$ )  $\delta$  171.6, 149.2, 147.9, 137.5, 129.9, 128.2, 126.0, 122.6, 120.2, 119.6, 118.9, 113.0, 111.0, 110.0, 107.7, 55.7, 33.1, 26.7. HRMS (APCI): calcd for  $\text{C}_{18}\text{H}_{17}\text{N}_4\text{O}_3$  [ $\text{M} - \text{H}$ ] $^-$ : 337.1306, Found: 337.1310.

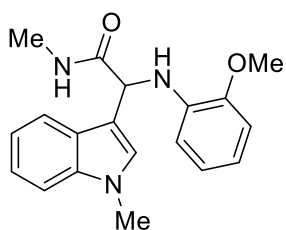

**2-((2-methoxyphenyl)amino)-N-methyl-2-(1-methyl-1H-indol-3-yl)acetamide (3s):** White solid (61.1 mg, 95% yield);  $R_f = 0.48$  (PE:EA = 1:1);  $^1\text{H NMR}$  (500 MHz,  $\text{CDCl}_3$ )  $\delta$  7.63 (d,  $J = 7.9$  Hz, 1H), 7.34 (d,  $J = 8.2$  Hz, 1H), 7.27 (t,  $J = 7.7$  Hz, 1H), 7.19 (d,  $J = 5.3$  Hz, 1H), 7.15 – 7.13 (m, 2H), 6.92 – 6.89 (m, 1H), 6.82 – 6.81 (m, 2H), 6.64 (d,  $J = 7.7$  Hz, 1H), 5.03 (s, 1H), 5.00 (s, 1H), 3.79 (s, 3H), 3.77 (s, 3H), 2.89 (d,  $J = 4.9$  Hz, 3H).  $^{13}\text{C NMR}$  (126 MHz,  $\text{CDCl}_3$ )  $\delta$  172.8, 147.2, 137.3, 137.1, 127.8, 126.4, 122.2, 121.4, 119.8, 119.3, 118.6, 112.0, 111.3, 109.7, 109.6, 57.5, 55.5, 33.0, 26.4. HRMS (APCI): calcd for  $\text{C}_{19}\text{H}_{20}\text{N}_3\text{O}_2$  [ $\text{M} - \text{H}$ ] $^-$ : 322.1561, Found: 322.1565.

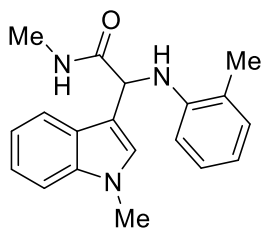

***N*-methyl-2-(1-methyl-1*H*-indol-3-yl)-2-(*o*-tolylamino)acetamide**

**(3t):** White solid (53.5 mg, 87% yield);  $R_f = 0.47$  (PE:EA = 1:1);  $^1\text{H NMR}$  (500 MHz,  $\text{CDCl}_3$ )  $\delta$  7.64 (d,  $J = 7.9$  Hz, 1H), 7.35 (d,  $J = 8.2$  Hz, 1H), 7.28 (t,  $J = 7.6$  Hz, 1H), 7.17 – 7.12 (m, 4H), 7.00 (d,  $J = 5.2$  Hz, 1H), 6.79 (t,  $J = 7.4$  Hz, 1H), 6.64 (d,  $J = 8.0$  Hz, 1H), 5.13 (s, 1H), 4.48 (s, 1H), 3.78 (s, 3H), 2.88 (d,  $J = 4.9$  Hz, 3H), 2.17 (s, 3H).  $^{13}\text{C NMR}$  (126 MHz,  $\text{CDCl}_3$ )  $\delta$  172.7, 145.2, 137.4, 130.3, 127.8, 127.5, 126.3, 123.0, 122.3, 119.9, 118.9, 118.8, 112.0, 111.2, 109.9, 57.2, 33.0, 26.4, 17.7. HRMS (APCI): calcd for  $\text{C}_{19}\text{H}_{20}\text{N}_3\text{O}$  [ $\text{M} - \text{H}$ ] $^-$ : 306.1612, Found: 306.1615.

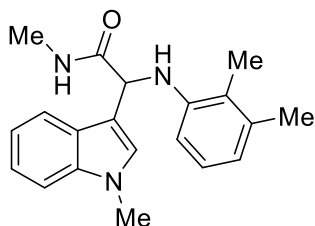

**2-((2,3-dimethylphenyl)amino)-*N*-methyl-2-(1-methyl-1*H*-**

**indol-3-yl)acetamide (3u):** White solid (51.7 mg, 81% yield);  $R_f = 0.5$  (PE:EA = 1:1);  $^1\text{H NMR}$  (500 MHz,  $\text{CDCl}_3$ )  $\delta$  7.66 (d,  $J = 7.9$  Hz, 1H), 7.36 (d,  $J = 8.2$  Hz, 1H), 7.29 (t,  $J = 7.7$  Hz, 1H), 7.18 – 7.14 (m, 2H), 7.06 (t,  $J = 7.8$  Hz, 1H), 7.01 (d,  $J = 5.1$  Hz, 1H), 6.73 (d,  $J = 7.5$  Hz, 1H), 6.55 (d,  $J = 8.1$  Hz, 1H), 5.14 (s, 1H), 4.51 (s, 1H), 3.78 (s, 3H), 2.88 (d,  $J = 5.0$  Hz, 3H), 2.33 (s, 3H), 2.09 (s, 3H).  $^{13}\text{C NMR}$  (126 MHz,  $\text{CDCl}_3$ )  $\delta$  172.8, 145.2, 137.4, 136.9, 127.8, 126.5, 126.4, 122.3, 121.3, 121.0, 119.9, 119.0, 112.2, 109.8, 109.4, 57.4, 32.9, 26.4, 20.8, 12.8. HRMS (APCI): calcd for  $\text{C}_{20}\text{H}_{22}\text{N}_3\text{O}$  [ $\text{M} - \text{H}$ ] $^-$ : 320.1768, Found: 320.1770.

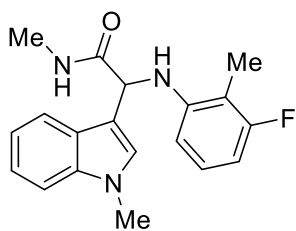

**2-((3-fluoro-2-methylphenyl)amino)-*N*-methyl-2-(1-methyl-1*H*-**

**indol-3-yl)acetamide (3v):** White solid (59.6 mg, 92% yield);  $R_f = 0.5$  (PE:EA = 1:1);  $^1\text{H NMR}$  (500 MHz,  $\text{CDCl}_3$ )  $\delta$  7.62 (d,  $J = 8.0$  Hz, 1H), 7.35 (d,  $J = 8.2$  Hz, 1H), 7.28 (t,  $J = 7.8$  Hz, 1H), 7.16 (t,  $J = 7.5$  Hz, 1H), 7.13 (s, 1H), 7.04 – 7.00 (m, 1H), 6.71 (d,  $J = 5.6$  Hz, 1H), 6.54 (t,  $J = 8.8$  Hz, 1H), 6.38 (d,  $J = 8.1$  Hz, 1H), 5.12 (s, 1H), 4.67 (s, 1H), 3.78 (s, 3H), 2.86 (d,  $J = 4.9$  Hz, 3H), 2.08 (s, 3H).  $^{13}\text{C NMR}$  (126 MHz,  $\text{CDCl}_3$ )  $\delta$  172.4, 161.0 (d,  $J = 240.8$  Hz), 146.9 (d,  $J = 6.9$  Hz), 137.5, 127.9, 127.5 (d,  $J = 11.3$  Hz), 126.3, 122.5, 120.1, 118.8, 111.9, 110.0, 109.9 (d,  $J = 18.7$  Hz), 106.9 (d,  $J = 2.1$  Hz), 105.7 (d,  $J = 23.8$  Hz), 57.1, 33.0, 26.5, 8.5 (d,  $J = 6.5$  Hz);  $^{19}\text{F NMR}$  (471 MHz,  $\text{CDCl}_3$ )  $\delta$  -116.95. HRMS (APCI): calcd for  $\text{C}_{19}\text{H}_{19}\text{N}_3\text{OF}$  [ $\text{M} - \text{H}$ ] $^-$ : 324.1518, Found: 324.1519.

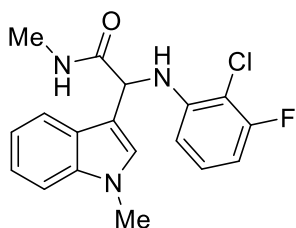

**2-((2-chloro-3-fluorophenyl)amino)-*N*-methyl-2-(1-methyl-1*H*-**

**indol-3-yl)acetamide (3w):** Yellow solid (50.0 mg, 72% yield);  $R_f = 0.52$  (PE:EA = 1:1);  $^1\text{H NMR}$  (500 MHz,  $\text{CDCl}_3$ )  $\delta$  7.65 (d,  $J = 8.0$  Hz, 1H), 7.35 (d,  $J = 8.3$  Hz, 1H), 7.29 (t,  $J = 7.6$  Hz, 1H), 7.17 (t,  $J = 7.5$  Hz, 1H), 7.14 (s, 1H), 7.07 – 7.03 (m, 1H), 6.67 (d,  $J = 5.1$  Hz, 1H), 6.59 (t,  $J = 8.5$  Hz, 1H), 6.43 (d,  $J = 8.3$  Hz, 1H), 5.45 (d,  $J = 3.0$  Hz, 1H), 5.14 (d,  $J = 2.8$  Hz, 1H), 3.77 (s, 3H), 2.85 (d,  $J = 4.9$  Hz, 3H).  $^{13}\text{C NMR}$  (126 MHz,  $\text{CDCl}_3$ )  $\delta$  171.8, 158.8 (d,  $J = 243.5$  Hz), 144.7 (d,  $J = 2.4$  Hz), 137.4, 128.1 (d,  $J = 9.5$  Hz), 127.8, 126.1, 122.5, 120.1, 118.8, 111.1, 109.9, 107.7 (d,  $J = 2.4$  Hz), 107.1 (d,  $J = 20.3$  Hz), 105.9 (d,  $J = 21.6$  Hz), 56.6, 33.0, 26.6;  $^{19}\text{F NMR}$  (471 MHz,  $\text{CDCl}_3$ )  $\delta$  -114.30. HRMS (APCI): calcd for  $\text{C}_{18}\text{H}_{16}\text{N}_3\text{OCIF}$  [ $\text{M} - \text{H}$ ] $^-$ : 344.0971, Found: 344.0974.

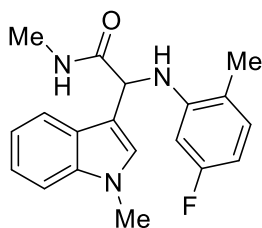

**2-((5-fluoro-2-methylphenyl)amino)-N-methyl-2-(1-methyl-1H-indol-3-yl)acetamide (3x):** White solid (57.6 mg, 89% yield);  $R_f = 0.5$  (PE:EA = 1:1);  $^1\text{H NMR}$  (500 MHz,  $\text{CDCl}_3$ )  $\delta$  7.64 (t,  $J = 7.6$  Hz, 1H), 7.35 (d,  $J = 8.2$  Hz, 1H), 7.28 (t,  $J = 7.6$  Hz, 1H), 7.16 (d,  $J = 7.9$  Hz, 1H), 7.14 (s, 1H), 7.00 (t,  $J = 7.6$  Hz, 1H), 6.70 (d,  $J = 5.0$  Hz, 1H), 6.43 – 6.39 (m, 1H), 6.32 (dd,  $J = 11.3, 2.7$  Hz, 1H), 5.08 (s, 1H), 4.78 (s, 1H), 3.76 (s, 3H), 2.85 (d,  $J = 4.9$  Hz, 3H), 2.14 (s, 3H).  $^{13}\text{C NMR}$  (126 MHz,  $\text{CDCl}_3$ )

$\delta$  172.1, 162.7(d,  $J = 242.7$  Hz), 146.5 (d,  $J = 9.9$  Hz), 137.5, 130.8(d,  $J = 10.2$  Hz), 127.9, 126.2, 122.4, 120.0, 118.8, 118.4(d,  $J = 3.7$  Hz), 111.5, 109.9, 104.2(d,  $J = 21.7$  Hz), 98.7(d,  $J = 27.7$  Hz), 56.5, 33.0, 26.5, 17.0.  $^{19}\text{F NMR}$  (471 MHz,  $\text{CDCl}_3$ )  $\delta$  -115.1. HRMS (APCI): calcd for  $\text{C}_{19}\text{H}_{19}\text{N}_3\text{OF}$  [ $\text{M} - \text{H}$ ] $^-$ : 324.1518, Found: 324.1519.

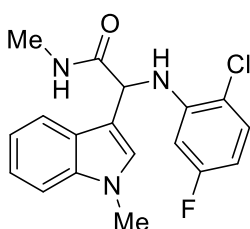

**2-((2-chloro-5-fluorophenyl)amino)-N-methyl-2-(1-methyl-1H-indol-3-yl)acetamide(3y):** Yellow solid (56.3 mg, 81% yield);  $R_f = 0.52$  (PE:EA = 1:1);  $^1\text{H NMR}$  (500 MHz,  $\text{CDCl}_3$ )  $\delta$  7.65 (d,  $J = 8.1$  Hz, 1H), 7.34 (d,  $J = 8.2$  Hz, 1H), 7.28 (t,  $J = 7.6$  Hz, 1H), 7.22 – 7.19 (m, 1H), 7.16 (t,  $J = 7.4$  Hz, 1H), 7.14 (s, 1H), 6.47 (d,  $J = 5.6$  Hz, 1H), 6.42 – 6.35 (m, 2H), 5.57 (s, 1H), 5.08 (s, 1H), 3.77 (s, 3H), 2.84 (d,  $J = 4.9$  Hz, 3H).

$^{13}\text{C NMR}$  (126 MHz,  $\text{CDCl}_3$ )  $\delta$  171.5, 162.6 (d,  $J = 243.9$  Hz), 144.5(d,  $J = 10.7$  Hz), 137.6, 130.0(d,  $J = 10.3$  Hz), 127.9, 126.1, 122.6, 120.2, 118.9, 115.1 (d,  $J = 3.9$  Hz), 111.0, 110.0, 105.1 (d,  $J = 22.9$  Hz), 100.1(d,  $J = 27.5$  Hz), 56.2, 33.0, 26.6.  $^{19}\text{F NMR}$  (471 MHz,  $\text{CDCl}_3$ )  $\delta$  -113.0. HRMS (APCI): calcd for  $\text{C}_{18}\text{H}_{16}\text{N}_3\text{OCIF}$  [ $\text{M} - \text{H}$ ] $^-$ : 344.0971, Found: 344.0974.

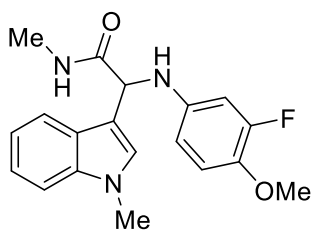

**2-((3-fluoro-4-methoxyphenyl)amino)-N-methyl-2-(1-methyl-1H-indol-3-yl)acetamide (3z):** White solid (53.8 mg, 79% yield);  $R_f = 0.37$  (PE:EA = 1:1);  $^1\text{H NMR}$  (500 MHz,  $\text{CDCl}_3$ )  $\delta$  7.60 (d,  $J = 8.0$  Hz, 1H), 7.33 (d,  $J = 8.2$  Hz, 1H), 7.27 (t,  $J = 7.6$  Hz, 1H), 7.14 (t,  $J = 7.5$  Hz, 1H), 7.10 (s, 1H), 6.91 (d,  $J = 5.2$  Hz, 1H), 6.83 (t,  $J = 9.0$  Hz, 1H), 6.45 (dd,  $J = 12.9, 2.8$  Hz, 1H), 6.35 (d,  $J = 8.9$  Hz, 1H),

4.98 (s, 1H), 4.46 (s, 1H), 3.81 (s, 3H), 3.75 (s, 3H), 2.86 (d,  $J = 4.9$  Hz, 3H).  $^{13}\text{C NMR}$  (126 MHz,  $\text{CDCl}_3$ )  $\delta$  172.4, 153.3 (d,  $J = 243.1$  Hz), 142.1 (d,  $J = 8.5$  Hz), 140.6 (d,  $J = 10.8$  Hz), 137.4, 127.8, 126.2, 122.4, 120.0, 119.0, 115.6(d,  $J = 2.7$  Hz), 111.7, 109.9, 108.8 (d,  $J = 3.0$  Hz), 103.1 (d,  $J = 21.4$  Hz), 57.6, 57.4, 33.0, 26.5;  $^{19}\text{F NMR}$  (471 MHz,  $\text{CDCl}_3$ )  $\delta$  -133.17. HRMS (APCI): calcd for  $\text{C}_{19}\text{H}_{19}\text{N}_3\text{O}_2\text{F}$  [ $\text{M} - \text{H}$ ] $^-$ : 340.1467, Found: 340.1471.

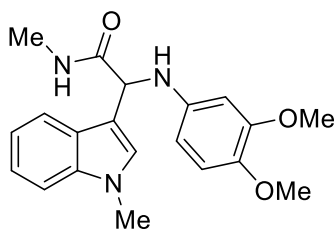

**2-((2,3-dimethoxyphenyl)amino)-N-methyl-2-(1-methyl-1H-indol-3-yl)acetamide (3aa):** Yellow solid (63.5 mg, 90% yield);  $R_f = 0.20$  (PE:EA = 1:1);  $^1\text{H NMR}$  (500 MHz,  $\text{CDCl}_3$ )  $\delta$  7.62 (d,  $J = 7.9$  Hz, 1H), 7.33 (d,  $J = 8.2$  Hz, 1H), 7.27 (t,  $J = 7.7$  Hz, 1H), 7.15 – 7.12 (m, 2H), 7.11 (s, 1H), 6.75 (d,  $J = 8.6$  Hz, 1H), 6.27 (s, 1H), 6.18 (d,  $J = 8.7$  Hz, 1H), 5.02 (s, 1H), 4.30 (s, 1H), 3.82 (s, 3H),

3.79 (s, 3H), 3.76 (s, 3H), 2.89 (d,  $J = 4.6$  Hz, 3H).  $^{13}\text{C NMR}$  (126 MHz,  $\text{CDCl}_3$ )  $\delta$  172.8, 150.0, 142.6, 142.0, 137.4, 127.7, 126.3, 122.3, 119.9, 119.0, 112.9, 112.1, 109.9, 104.3, 99.6, 58.0, 56.6, 55.9, 33.0, 26.4. HRMS (APCI): calcd for  $\text{C}_{20}\text{H}_{22}\text{N}_3\text{O}_3$  [ $\text{M} - \text{H}$ ] $^-$ : 352.1667, Found: 352.1668.

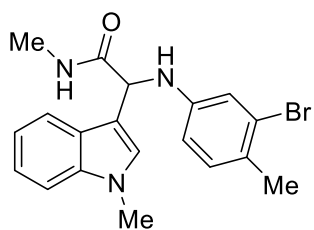

**2-((3-bromo-4-methylphenyl)amino)-N-methyl-2-(1-methyl-1H-indol-3-yl)acetamide (3ab):** White solid (65.3 mg, 85% yield);  $R_f = 0.40$  (PE:EA = 1:1);  $^1\text{H NMR}$  (500 MHz,  $\text{CDCl}_3$ )  $\delta$  7.58 (d,  $J = 8.2$  Hz, 1H), 7.33 (d,  $J = 8.2$  Hz, 1H), 7.27 (t,  $J = 7.0$  Hz, 1H), 7.14 (t,  $J = 7.3$  Hz, 1H), 7.10 (s, 1H), 7.03 (d,  $J = 8.2$  Hz, 1H), 6.90 (d,  $J = 5.2$  Hz, 1H), 6.87 (d,  $J = 2.4$  Hz, 1H), 6.51 (dd,  $J = 8.2, 2.5$  Hz, 1H), 5.02 (s, 1H), 4.50 (s, 1H), 3.76 (s, 3H), 2.88 (d,  $J = 4.9$  Hz, 3H), 2.29 (s, 3H).  $^{13}\text{C NMR}$  (126 MHz,  $\text{CDCl}_3$ )  $\delta$  172.3, 146.3, 137.4, 131.3, 128.0, 127.8, 126.2, 125.5, 122.4, 120.0, 119.0, 117.5, 112.9, 111.7, 109.9, 57.1, 33.0, 26.5, 21.9. HRMS (APCI): calcd for  $\text{C}_{19}\text{H}_{19}\text{N}_3\text{OBr}$  [ $\text{M} - \text{H}$ ] $^-$ : 384.0717, Found: 384.0719.

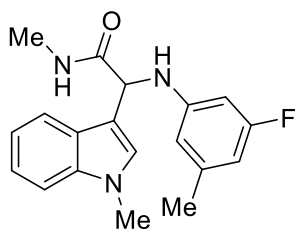

**2-((3-fluoro-5-methylphenyl)amino)-N-methyl-2-(1-methyl-1H-indol-3-yl)acetamide (3ac):** Light yellow solid (62.7 mg, 95% yield);  $R_f = 0.51$  (PE:EA = 1:1);  $^1\text{H NMR}$  (500 MHz,  $\text{CDCl}_3$ )  $\delta$  7.61 (d,  $J = 7.9$  Hz, 1H), 7.34 (d,  $J = 8.3$  Hz, 1H), 7.28 (t,  $J = 7.3$  Hz, 1H), 7.15 (t,  $J = 7.5$  Hz, 1H), 7.10 (s, 1H), 6.82 (d,  $J = 5.2$  Hz, 1H), 6.33 (d,  $J = 9.5$  Hz, 1H), 6.27 (s, 1H), 6.17 (d,  $J = 10.6$  Hz, 1H), 5.05 (s, 1H), 4.65 (brs, 1H), 3.76 (s, 3H), 2.87 (d,  $J = 4.9$  Hz, 3H), 2.26 (s, 3H).  $^{13}\text{C NMR}$  (126 MHz,  $\text{CDCl}_3$ )  $\delta$  172.2, 164.0 (d,  $J = 243.41$  Hz), 148.8 (d,  $J = 10.68$  Hz), 141.2 (d,  $J = 9.34$  Hz), 137.5, 127.8, 126.2, 122.4, 120.0, 119.0, 111.8, 110.3 (d,  $J = 1.47$  Hz), 109.9, 106.5 (d,  $J = 23.31$  Hz), 98.0 (d,  $J = 27.75$  Hz), 56.9, 32.9, 26.5, 21.7 (d,  $J = 2.46$  Hz);  $^{19}\text{F NMR}$  (471 MHz,  $\text{CDCl}_3$ )  $\delta$  -113.40. HRMS (APCI): calcd for  $\text{C}_{19}\text{H}_{19}\text{N}_3\text{OF}$  [ $\text{M} - \text{H}$ ] $^-$ : 324.1518, Found: 324.1519.

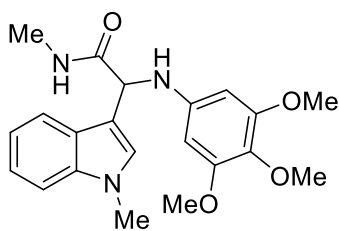

**N-methyl-2-(1-methyl-1H-indol-3-yl)-2-((3,4,5-trimethoxyphenyl)amino)acetamide (3ad):** Yellow solid (60.6 mg, 79% yield);  $R_f = 0.24$  (PE:EA = 1:1);  $^1\text{H NMR}$  (500 MHz,  $\text{CDCl}_3$ )  $\delta$  7.64 (d,  $J = 7.9$  Hz, 1H), 7.33 (d,  $J = 8.3$  Hz, 1H), 7.27 (t,  $J = 7.6$  Hz, 1H), 7.15 (t,  $J = 7.5$  Hz, 1H), 7.11 (s, 1H), 6.97 (d,  $J = 5.4$  Hz, 1H), 5.88 (s, 2H), 5.06 (s, 1H), 4.47 (brs, 1H), 3.77–3.75 (m, 12H), 2.89 (d,  $J = 4.9$  Hz, 3H).  $^{13}\text{C NMR}$  (126 MHz,  $\text{CDCl}_3$ )  $\delta$  172.6, 154.1, 144.1, 137.4, 131.1, 127.7, 126.3, 122.4, 119.9, 118.9, 112.0, 109.9, 91.2, 61.2, 57.4, 56.1, 33.0, 26.5. HRMS (APCI): calcd for  $\text{C}_{21}\text{H}_{24}\text{N}_3\text{O}_4$  [ $\text{M} - \text{H}$ ] $^-$ : 382.1772, Found: 382.1774.

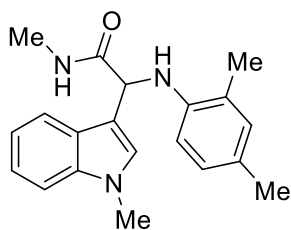

**2-((2,4-dimethylphenyl)amino)-N-methyl-2-(1-methyl-1H-indol-3-yl)acetamide (3ae):** Light yellow solid (48.1 mg, 75% yield);  $R_f = 0.35$  (PE:EA = 1:1);  $^1\text{H NMR}$  (500 MHz,  $\text{CDCl}_3$ )  $\delta$  7.61 (d,  $J = 7.9$  Hz, 1H), 7.34 (d,  $J = 8.2$  Hz, 1H), 7.27 (t,  $J = 7.6$  Hz, 1H), 7.14 (d,  $J = 7.6$  Hz, 1H), 7.12 (s, 1H), 7.03 (d,  $J = 5.0$  Hz, 1H), 6.96–6.95 (m, 2H), 6.55 (d,  $J = 7.9$  Hz, 1H), 5.09 (s, 1H), 4.28 (brs, 1H), 3.77 (s, 3H), 2.88 (d,  $J = 4.9$  Hz, 3H), 2.26 (s, 3H), 2.13 (s, 3H).  $^{13}\text{C NMR}$  (126 MHz,  $\text{CDCl}_3$ )  $\delta$  172.8, 143.0, 137.5, 131.3, 128.1, 127.8, 127.7, 126.4, 123.1, 122.3, 120.0, 119.0, 112.3, 111.4, 109.9, 57.6, 33.0, 26.4, 20.5, 17.6. HRMS (APCI): calcd for  $\text{C}_{20}\text{H}_{22}\text{N}_3\text{O}$  [ $\text{M} - \text{H}$ ] $^-$ : 320.1768, Found: 320.1770.

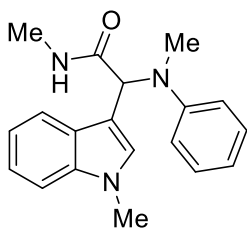

***N*-methyl-2-(methyl(phenyl)amino)-2-(1-methyl-1*H*-indol-3-yl)acetamide (3af):** White solid (40.1 mg, 65% yield);  $R_f = 0.43$  (PE:EA = 1:1);  $^1\text{H NMR}$  (500 MHz,  $\text{CDCl}_3$ )  $\delta$  7.33 (t,  $J = 7.8$  Hz, 2H), 7.30 (d,  $J = 8.2$  Hz, 1H), 7.21 (t,  $J = 7.6$  Hz, 1H), 7.15 (d,  $J = 8.0$  Hz, 1H), 7.12 (s, 1H), 7.00 (t,  $J = 7.5$  Hz, 1H), 6.91 (d,  $J = 8.4$  Hz, 2H), 6.88 (d,  $J = 7.5$  Hz, 1H), 6.85 (d,  $J = 5.4$  Hz, 1H), 5.68 (s, 1H), 3.77 (s, 3H), 2.93 (d,  $J = 4.9$  Hz, 3H), 2.69 (s, 3H).  $^{13}\text{C NMR}$  (126 MHz,  $\text{CDCl}_3$ )  $\delta$  172.3, 150.1, 137.1, 129.5, 129.0, 128.0, 122.0, 119.7, 119.5, 118.5, 113.9, 109.6, 109.4, 63.0, 33.9, 32.9, 26.5. HRMS (APCI): calcd for  $\text{C}_{19}\text{H}_{20}\text{N}_3\text{O}$  [ $\text{M} - \text{H}$ ]: 306.1612, Found: 306.1615.

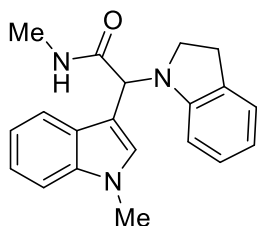

**2-(indolin-1-yl)-*N*-methyl-2-(1-methyl-1*H*-indol-3-yl)acetamide (3ag):** White solid (54.5 mg, 85% yield);  $R_f = 0.45$  (PE:EA = 1:1);  $^1\text{H NMR}$  (500 MHz,  $\text{CDCl}_3$ )  $\delta$  7.54 (d,  $J = 8.0$  Hz, 1H), 7.32 (d,  $J = 8.3$  Hz, 1H), 7.29 (d,  $J = 5.1$  Hz, 1H), 7.24 (t,  $J = 7.9$  Hz, 1H), 7.16 (t,  $J = 7.7$  Hz, 1H), 7.13 (d,  $J = 7.5$  Hz, 1H), 7.11 (d,  $J = 8.8$  Hz, 2H), 6.81 (t,  $J = 7.4$  Hz, 1H), 6.63 (d,  $J = 7.8$  Hz, 1H), 5.08 (s, 1H), 3.76 (s, 3H), 3.41 – 3.36 (m, 1H), 3.07 – 3.01 (m, 1H), 2.96 – 2.89 (m, 4H), 2.86 – 2.82 (m, 1H).  $^{13}\text{C NMR}$  (126 MHz,  $\text{CDCl}_3$ )  $\delta$  172.2, 151.8, 137.2, 130.8, 129.4, 127.6, 127.5, 124.7, 122.0, 119.8, 119.6, 119.3, 109.6, 109.1, 108.2, 61.1, 51.2, 32.9, 28.4, 26.3. HRMS (APCI): calcd for  $\text{C}_{20}\text{H}_{20}\text{N}_3\text{O}$  [ $\text{M} - \text{H}$ ]: 318.1612, Found: 318.1615.

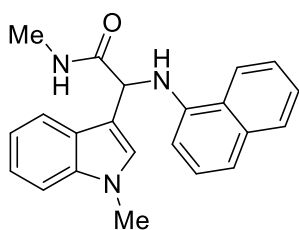

***N*-methyl-2-(1-methyl-1*H*-indol-3-yl)-2-(naphthalen-1-ylamino)acetamide (3ah):** Light yellow solid (53.5 mg, 78% yield);  $R_f = 0.43$  (PE:EA = 1:1);  $^1\text{H NMR}$  (500 MHz,  $\text{CDCl}_3$ )  $\delta$  7.84 (t,  $J = 8.1$  Hz, 2H), 7.72 (d,  $J = 8.0$  Hz, 1H), 7.48 (t,  $J = 7.5$  Hz, 1H), 7.43 (t, 1H), 7.37 (d,  $J = 8.3$  Hz, 1H), 7.35 (d,  $J = 3.9$  Hz, 2H), 7.30 (t,  $J = 7.7$  Hz, 1H), 7.19 (s, 1H), 7.17 (t,  $J = 7.6$  Hz, 1H), 6.92 (d,  $J = 5.2$  Hz, 1H), 6.66 (t,  $J = 4.4$  Hz, 1H), 5.40 (s, 1H), 5.30 (s, 1H), 3.78 (s, 3H), 2.86 (d,  $J = 4.9$  Hz, 3H).  $^{13}\text{C NMR}$  (126 MHz,  $\text{CDCl}_3$ )  $\delta$  172.5, 142.2, 137.5, 134.3, 128.8, 128.0, 126.6, 126.4, 126.1, 125.3, 123.7, 122.4, 120.1, 119.1, 119.0, 111.8, 109.9, 106.1, 57.0, 33.0, 26.5. HRMS (APCI): calcd for  $\text{C}_{22}\text{H}_{20}\text{N}_3\text{O}$  [ $\text{M} - \text{H}$ ]: 342.1612, Found: 342.1615.

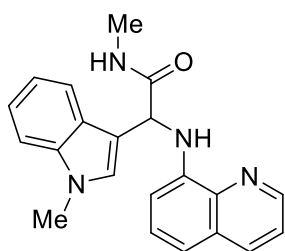

***N*-methyl-2-(1-methyl-1*H*-indol-3-yl)-2-(quinolin-8-ylamino)acetamide (3ai):** White solid (33.5 mg, 37% yield);  $R_f = 0.38$  (PE:EA = 1:1);  $^1\text{H NMR}$  (500 MHz,  $\text{CDCl}_3$ )  $\delta$  8.65 (s, 1H), 8.10 (d,  $J = 8.2$  Hz, 1H), 7.65 (d,  $J = 8.0$  Hz, 1H), 7.42 (t,  $J = 7.9$  Hz, 1H), 7.39 – 7.37 (m, 1H), 7.34 (d,  $J = 8.3$  Hz, 1H), 7.27 (t,  $J = 8.1$  Hz, 1H), 7.22 – 7.19 (m, 3H), 7.11 (t,  $J = 7.6$  Hz, 1H), 6.82 (s, 1H), 6.78 (d,  $J = 7.6$  Hz, 1H), 5.26 (s, 1H), 3.78 (s, 3H), 2.89 (d,  $J = 5.0$  Hz, 3H).  $^{13}\text{C NMR}$  (126 MHz,  $\text{CDCl}_3$ )  $\delta$  172.7, 147.6, 143.8, 138.4, 137.4, 136.2, 128.6, 127.8, 126.6, 122.2, 121.8, 119.8, 119.3, 116.4, 111.8, 109.7, 106.8, 57.4, 33.0, 26.4. HRMS (APCI): calcd for  $\text{C}_{21}\text{H}_{19}\text{N}_4\text{O}$  [ $\text{M} - \text{H}$ ]: 343.1564, Found: 343.1566.



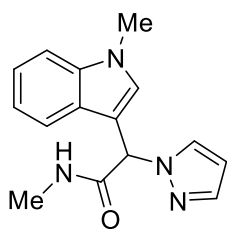

***N*-methyl-2-(1-methyl-1*H*-indol-3-yl)-2-(1*H*-pyrazol-1-yl)acetamide (3aj):** Yellow solid (44.5 mg, 64% yield);  $R_f = 0.20$  (PE:EA = 1:1);  $^1\text{H NMR}$  (500 MHz,  $\text{CDCl}_3$ )  $\delta$  7.61 (s, 1H), 7.49 (s, 1H), 7.32 (d,  $J = 10.7$  Hz, 2H), 7.29 (s, 1H), 7.24 (t,  $J = 7.7$  Hz, 1H), 7.07 (t,  $J = 7.5$  Hz, 1H), 6.78 (d,  $J = 5.0$  Hz, 1H), 6.36 (s, 1H), 6.26 (s, 1H), 3.77 (s, 3H), 2.84 (d,  $J = 4.8$  Hz, 3H).  $^{13}\text{C NMR}$  (126 MHz,  $\text{CDCl}_3$ )  $\delta$  169.5, 140.6, 137.2, 130.3, 129.2, 126.7, 122.4, 120.1, 118.8, 109.7, 108.6, 105.9, 62.6, 33.1, 26.6. HRMS (APCI): calcd for  $\text{C}_{15}\text{H}_{15}\text{N}_4\text{O}$  [ $\text{M} - \text{H}$ ] $^-$ : 267.1251, Found: 267.1254.

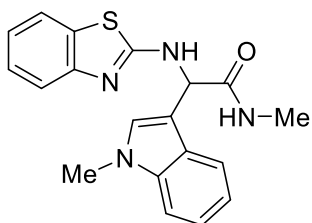

**2-(benzo[d]thiazol-2-ylamino)-*N*-methyl-2-(1-methyl-1*H*-indol-3-yl)acetamide (3ak):** Yellow solid (29.8 mg, 43% yield);  $R_f = 0.30$  (PE:EA = 1:1);  $^1\text{H NMR}$  (500 MHz,  $\text{DMSO}-d_6$ )  $\delta$  8.57 (d,  $J = 7.6$  Hz, 1H), 8.23 (d,  $J = 4.8$  Hz, 1H), 7.71 (d,  $J = 8.0$  Hz, 1H), 7.66 (d,  $J = 7.8$  Hz, 1H), 7.41 (t,  $J = 7.9$  Hz, 2H), 7.32 (s, 1H), 7.22 (t,  $J = 7.7$  Hz, 1H), 7.16 (t,  $J = 7.6$  Hz, 1H), 7.05 – 7.00 (m, 2H), 5.84 (d,  $J = 7.6$  Hz, 1H), 3.77 (s, 3H), 2.62 (d,  $J = 4.6$  Hz, 3H).  $^{13}\text{C NMR}$  (126 MHz,  $\text{DMSO}-d_6$ )  $\delta$  170.8, 165.3, 152.2, 136.6, 130.8, 128.4, 126.2, 125.5, 121.5, 121.1, 121.0, 119.5, 119.0, 118.1, 111.3, 109.8, 54.1, 32.5, 25.8. HRMS (APCI): calcd for  $\text{C}_{19}\text{H}_{17}\text{N}_4\text{OS}$  [ $\text{M} - \text{H}$ ] $^-$ : 349.1129, Found: 349.1133.

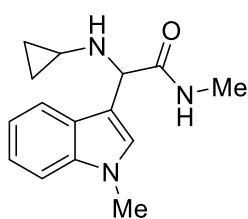

**2-(cyclopropylamino)-*N*-methyl-2-(1-methyl-1*H*-indol-3-yl)acetamide (3al):** Yellow solid (36.8 mg, 69% yield);  $R_f = 0.31$  (PE:EA = 1:1);  $^1\text{H NMR}$  (500 MHz,  $\text{CDCl}_3$ )  $\delta$  7.65 (d,  $J = 7.9$  Hz, 1H), 7.29 (d,  $J = 8.2$  Hz, 1H), 7.23 (t,  $J = 7.6$  Hz, 1H), 7.12 (t,  $J = 7.5$  Hz, 1H), 7.06 (d,  $J = 4.3$  Hz, 1H), 7.03 (s, 1H), 4.58 (s, 1H), 3.74 (s, 3H), 2.86 (d,  $J = 5.1$  Hz, 3H), 2.29 – 2.25 (m, 1H), 2.15 (s, 1H), 0.48 – 0.45 (m, 2H), 0.42 – 0.40 (m, 2H).  $^{13}\text{C NMR}$  (126 MHz,  $\text{CDCl}_3$ )  $\delta$  173.9, 137.3, 127.4, 126.5, 122.1, 119.5, 119.3, 113.4, 109.6, 60.5, 32.8, 30.7, 26.5, 6.5, 6.4. HRMS (APCI): calcd for  $\text{C}_{15}\text{H}_{18}\text{N}_3\text{O}$  [ $\text{M} - \text{H}$ ] $^-$ : 256.1455, Found: 256.1458.

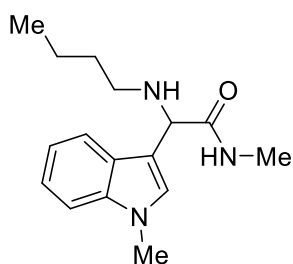

**2-(butylamino)-*N*-methyl-2-(1-methyl-1*H*-indol-3-yl)acetamide (3am):** Yellow solid (28.2 mg, 52% yield);  $R_f = 0.30$  (PE:EA = 1:1);  $^1\text{H NMR}$  (500 MHz,  $\text{CDCl}_3$ )  $\delta$  7.68 (d,  $J = 8.0$  Hz, 1H), 7.40 (d,  $J = 5.8$  Hz, 1H), 7.29 (d,  $J = 8.2$  Hz, 1H), 7.23 (t,  $J = 7.6$  Hz, 1H), 7.12 (t,  $J = 7.5$  Hz, 1H), 7.04 (s, 1H), 4.46 (s, 1H), 3.74 (s, 3H), 2.87 (d,  $J = 5.1$  Hz, 3H), 2.75 – 2.70 (m, 1H), 2.66 – 2.61 (m, 1H), 1.77 (s, 1H), 1.52 – 1.46 (m, 2H), 1.40 – 1.34 (m, 2H), 0.91 (t,  $J = 7.3$  Hz, 3H).  $^{13}\text{C NMR}$  (126 MHz,  $\text{CDCl}_3$ )  $\delta$  173.7, 137.3, 127.3, 126.5, 122.1, 119.5, 119.5, 113.3, 109.6, 60.8, 49.0, 32.9, 32.4, 26.1, 20.5, 14.1. HRMS (APCI): calcd for  $\text{C}_{16}\text{H}_{22}\text{N}_3\text{O}$  [ $\text{M} - \text{H}$ ] $^-$ : 272.1768, Found: 272.1771.

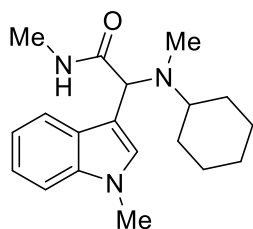

**2-(cyclohexyl(methyl)amino)-*N*-methyl-2-(1-methyl-1*H*-indol-3-yl)acetamide (3an):** Yellow solid (48.5 mg, 77% yield);  $R_f = 0.49$  (PE:EA = 1:1);  $^1\text{H NMR}$  (500 MHz,  $\text{CDCl}_3$ )  $\delta$  7.62 (d,  $J = 8.0$  Hz, 1H), 7.57 (s, 1H), 7.27 (d,  $J = 8.3$  Hz, 1H), 7.19 (t,  $J = 7.5$  Hz, 1H), 7.09 (t,  $J = 7.4$  Hz, 1H), 7.02 (s, 1H), 4.53 (s, 1H), 3.73 (s, 3H), 2.86 (d,  $J = 5.1$  Hz, 3H), 2.53 (t,  $J = 11.6$  Hz, 1H), 2.13 (s, 3H), 1.85 – 1.83 (m, 1H), 1.77 – 1.71 (m, 3H), 1.39 – 1.25 (m, 3H), 1.19 – 1.03 (m, 3H).  $^{13}\text{C NMR}$  (126 MHz,  $\text{CDCl}_3$ )  $\delta$  174.2, 137.3, 129.1, 127.7, 121.7, 120.0, 119.5, 110.5, 109.5, 65.1, 60.2, 33.8, 32.9, 29.7, 28.6, 26.3, 26.1, 26.0. HRMS (APCI):

calcd for C<sub>19</sub>H<sub>26</sub>N<sub>3</sub>O [M - H]<sup>-</sup>: 312.2081, Found: 312.2086.

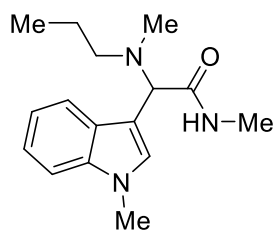

**N-methyl-2-(methyl(propyl)amino)-2-(1-methyl-1H-indol-3-yl)acetamide (3ao):** Yellow solid (49.1 mg, 90% yield); R<sub>f</sub> = 0.44 (PE:EA = 1:1); <sup>1</sup>H NMR (500 MHz, CDCl<sub>3</sub>) δ 7.63 (d, *J* = 8.0 Hz, 1H), 7.43 (s, 1H), 7.28 (d, *J* = 8.2 Hz, 1H), 7.21 (t, *J* = 7.5 Hz, 1H), 7.10 (t, *J* = 7.4 Hz, 1H), 7.03 (s, 1H), 4.29 (s, 1H), 3.75 (s, 3H), 2.87 (d, *J* = 5.1 Hz, 3H), 2.39 – 2.35 (m, 2H), 2.18 (s, 3H), 1.57 – 1.50 (m, 2H), 0.89 (t, *J* = 7.3 Hz, 3H).

<sup>13</sup>C NMR (126 MHz, CDCl<sub>3</sub>) δ 173.4, 137.2, 129.2, 129.2, 127.8, 121.7, 120.0, 119.5, 109.5, 67.8, 57.6, 39.6, 32.9, 26.1, 20.9, 11.9. HRMS (APCI): calcd for C<sub>16</sub>H<sub>22</sub>N<sub>3</sub>O [M - H]<sup>-</sup>: 272.1768, Found: 272.1771.

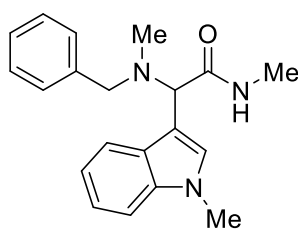

**2-(benzyl(methyl)amino)-N-methyl-2-(1-methyl-1H-indol-3-yl)acetamide (3ap):** White solid (52.4 mg, 82% yield); R<sub>f</sub> = 0.42 (PE:EA = 1:1); <sup>1</sup>H NMR (500 MHz, CDCl<sub>3</sub>) δ 7.68 (d, *J* = 8.0 Hz, 1H), 7.39 (s, 1H), 7.34 – 7.28 (m, 5H), 7.24 (d, *J* = 5.9 Hz, 1H), 7.21 (t, *J* = 7.7 Hz, 1H), 7.12 (t, *J* = 7.5 Hz, 1H), 7.07 (s, 1H), 4.41 (s, 1H), 3.75 (s, 3H), 3.63 (d, *J* = 13.3 Hz, 1H), 3.46 (d, *J* = 13.3 Hz, 1H), 2.89 (d, *J* =

5.0 Hz, 3H), 2.15 (s, 3H). <sup>13</sup>C NMR (126 MHz, CDCl<sub>3</sub>) δ 173.0, 139.1, 137.3, 129.3, 128.8, 128.5, 127.8, 127.2, 121.8, 120.0, 119.6, 109.6, 109.1, 67.3, 59.8, 40.1, 32.9, 26.2. HRMS (APCI): calcd for C<sub>20</sub>H<sub>22</sub>N<sub>3</sub>O [M - H]<sup>-</sup>: 320.1768, Found: 320.1771.

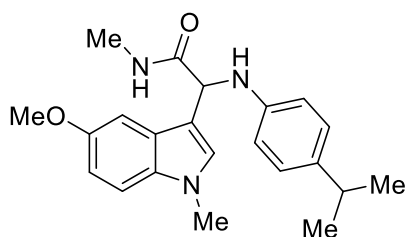

**2-((4-isopropylphenyl)amino)-2-(5-methoxy-1-methyl-1H-indol-3-yl)-N-methylacetamide (4a):** Yellow solid (58.3 mg, 80% yield); R<sub>f</sub> = 0.35 (PE:EA = 1:1); <sup>1</sup>H NMR (500 MHz, CDCl<sub>3</sub>) δ 7.21 (d, *J* = 8.9 Hz, 1H), 7.16 (d, *J* = 5.0 Hz, 1H), 7.10 (d, *J* = 8.1 Hz, 2H), 7.06 (s, 1H), 7.03 (d, *J* = 2.4 Hz, 1H), 6.91 (dd, *J* = 8.9, 2.4 Hz, 1H), 6.63 (d, *J* = 8.1 Hz, 2H),

4.99 (s, 1H), 4.34 (s, 1H), 3.80 (s, 3H), 3.73 (s, 3H), 2.89 (d, *J* = 5.0 Hz, 3H), 2.87 – 2.81 (m, 1H), 1.23 (d, *J* = 6.9 Hz, 6H). <sup>13</sup>C NMR (126 MHz, CDCl<sub>3</sub>) δ 172.9, 154.3, 145.4, 139.9, 132.7, 128.1, 127.4, 126.7, 113.9, 112.4, 111.7, 110.6, 101.0, 57.8, 56.0, 33.3, 33.1, 26.4, 24.3, 24.3. HRMS (APCI): calcd for C<sub>22</sub>H<sub>26</sub>N<sub>3</sub>O<sub>2</sub> [M - H]<sup>-</sup>: 364.2031, Found: 364.2036.

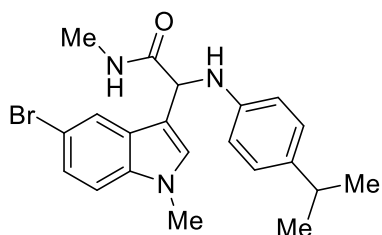

**2-((4-isopropylphenyl)amino)-2-(5-bromo-1-methyl-1H-indol-3-yl)-N-methylacetamide (4b):** White solid (79.9 mg, 97% yield); R<sub>f</sub> = 0.40 (PE:EA = 1:1); <sup>1</sup>H NMR (500 MHz, CDCl<sub>3</sub>) δ 7.74 (s, 1H), 7.33 (d, *J* = 8.7 Hz, 1H), 7.18 (d, *J* = 8.7 Hz, 1H), 7.15 (d, *J* = 5.0 Hz, 1H), 7.11 – 7.09 (m, 3H), 6.62 (d, *J* = 8.6 Hz, 2H), 4.96 (s, 1H), 4.30 (s, 1H), 3.73 (s, 3H), 2.88 (d, *J* =

4.9 Hz, 3H), 2.86 – 2.82 (m, 1H), 1.23 (d, *J* = 6.9 Hz, 6H). <sup>13</sup>C NMR (126 MHz, CDCl<sub>3</sub>) δ 172.5, 145.0, 140.0, 136.0, 129.0, 127.8, 127.4, 125.2, 121.7, 113.9, 113.3, 111.9, 111.3, 57.5, 33.3, 33.1, 26.4, 24.3. HRMS (APCI): calcd for C<sub>21</sub>H<sub>23</sub>N<sub>3</sub>OBr [M - H]<sup>-</sup>: 412.1030, Found: 412.1034.

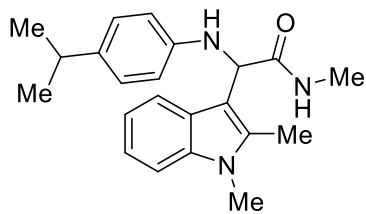

**2-(1,2-dimethyl-1H-indol-3-yl)-2-((4-isopropylphenyl)amino)-N-methylacetamide (4c):** White solid (25.2 mg, 36% yield);  $R_f = 0.44$  (PE:EA = 1:1);  $^1\text{H NMR}$  (500 MHz,  $\text{CDCl}_3$ )  $\delta$  7.61 (d,  $J = 7.9$  Hz, 1H), 7.29 (d,  $J = 8.2$  Hz, 1H), 7.19 (t,  $J = 7.6$  Hz, 1H), 7.13 (d,  $J = 4.9$  Hz, 1H), 7.11 (d,  $J = 7.6$  Hz, 1H), 7.09 (d,  $J = 8.1$  Hz, 2H), 6.61 (d,  $J = 7.4$  Hz, 2H), 4.98 (s, 1H), 4.43 (s,

1H), 3.67 (s, 3H), 2.86 (d,  $J = 5.0$  Hz, 3H), 2.83 – 2.81 (m, 1H), 2.47 (s, 3H), 1.22 (d,  $J = 6.8$  Hz, 6H).  $^{13}\text{C NMR}$  (126 MHz,  $\text{CDCl}_3$ )  $\delta$  172.8, 145.7, 139.6, 136.9, 135.5, 127.4, 125.6, 121.2, 119.7, 118.4, 113.9, 109.2, 108.5, 57.7, 33.3, 29.8, 26.3, 24.3, 24.3, 10.9. HRMS (APCI): calcd for  $\text{C}_{22}\text{H}_{26}\text{N}_3\text{O}$  [M - H]: 348.2081, Found: 348.2085.

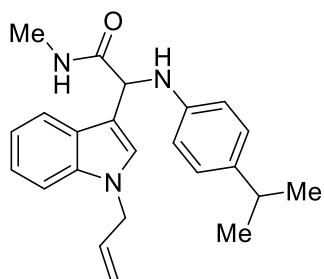

**2-(1-allyl-1H-indol-3-yl)-2-((4-isopropylphenyl)amino)-N-methylacetamide (4d):** White solid (69.2 mg, 96% yield);  $R_f = 0.45$  (PE:EA = 2:1);  $^1\text{H NMR}$  (500 MHz,  $\text{CDCl}_3$ )  $\delta$  7.62 (d,  $J = 7.9$  Hz, 1H), 7.34 (d,  $J = 8.3$  Hz, 1H), 7.25 (t,  $J = 7.5$  Hz, 1H), 7.21 (d,  $J = 5.0$  Hz, 1H), 7.15 – 7.13 (m, 2H), 7.11 (d,  $J = 8.4$  Hz, 2H), 6.63 (d,  $J = 8.0$  Hz, 2H), 6.02 – 5.94 (m, 1H), 5.23 (d,  $J = 10.2$  Hz, 1H), 5.15 (d,  $J = 17.1$  Hz, 1H), 5.04 (s, 1H), 4.70 (d,  $J = 5.4$  Hz, 2H), 4.37 (s,

1H), 2.90 (d,  $J = 4.9$  Hz, 3H), 2.88 – 2.82 (m, 1H), 1.23 (d,  $J = 7.1$  Hz, 6H).  $^{13}\text{C NMR}$  (126 MHz,  $\text{CDCl}_3$ )  $\delta$  172.7, 145.3, 139.9, 136.8, 133.1, 127.4, 126.8, 126.5, 122.3, 120.0, 119.2, 118.0, 113.9, 112.6, 110.2, 57.9, 49.1, 33.3, 26.4, 24.3, 24.3. HRMS (APCI): calcd for  $\text{C}_{23}\text{H}_{26}\text{N}_3\text{O}$  [M - H]: 360.2081, Found: 360.2085.

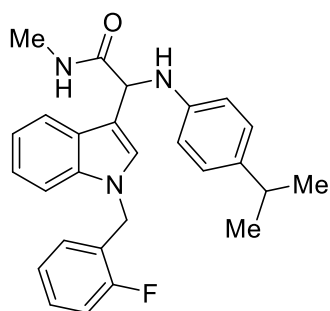

**2-(1-(2-fluorobenzyl)-1H-indol-3-yl)-2-((4-isopropylphenyl)amino)-N-methylacetamide (4e):** White solid (74.8 mg, 87% yield);  $R_f = 0.40$  (PE:EA = 2:1);  $^1\text{H NMR}$  (500 MHz,  $\text{CDCl}_3$ )  $\delta$  7.64 (d,  $J = 7.9$  Hz, 1H), 7.35 (d,  $J = 8.2$  Hz, 1H), 7.29 – 7.26 (m, 1H), 7.25 (d,  $J = 8.3$  Hz, 1H), 7.22 – 7.21 (m, 2H), 7.15 (t,  $J = 7.5$  Hz, 1H), 7.11 (d,  $J = 8.5$  Hz, 2H), 7.08 (d,  $J = 8.6$  Hz, 1H), 7.03 (t,  $J = 7.5$  Hz, 1H), 6.93 (t,  $J = 7.6$  Hz, 1H), 6.64 (d,  $J = 8.5$  Hz, 2H), 5.33 (s, 2H), 5.06 (s, 1H), 4.39 (s, 1H), 2.89 (d,  $J = 4.9$  Hz, 3H), 2.87 –

2.83 (m, 1H), 1.24 (d,  $J = 6.9$  Hz, 6H).  $^{13}\text{C NMR}$  (126 MHz,  $\text{CDCl}_3$ )  $\delta$  172.6, 160.4 (d,  $J = 247.84$  Hz), 145.3, 139.9, 136.9, 129.8 (d,  $J = 8.19$  Hz), 129.2 (d,  $J = 3.84$  Hz), 127.4, 127.2, 126.5, 124.6 (d,  $J = 3.61$  Hz), 124.2 (d,  $J = 15.00$  Hz), 122.6, 120.2, 119.4, 115.6 (d,  $J = 21.30$  Hz), 113.9, 113.1, 110.2, 57.9, 44.0 (d,  $J = 4.97$  Hz), 33.3, 26.4, 24.3.  $^{19}\text{F NMR}$  (471 MHz,  $\text{CDCl}_3$ )  $\delta$  -118.15. HRMS (APCI): calcd for  $\text{C}_{27}\text{H}_{27}\text{N}_3\text{OF}$  [M - H]: 428.2144, Found: 428.2148.

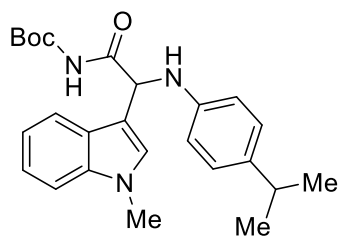

**tert-butyl (2-((4-isopropylphenyl)amino)-2-(1-methyl-1H-indol-3-yl)acetyl)carbamate (4f):** Yellow oil (47.6 mg, 57% yield);  $R_f = 0.30$  (PE:EA = 4:1);  $^1\text{H NMR}$  (500 MHz,  $\text{CDCl}_3$ )  $\delta$  8.83 (s, 1H), 7.63 (d,  $J = 8.1$  Hz, 1H), 7.33 (d,  $J = 8.1$  Hz, 1H), 7.28 (d,  $J = 7.2$  Hz, 1H), 7.16 – 7.12 (m, 4H), 6.68 (d,  $J = 8.5$  Hz, 2H), 5.24 (s, 1H), 4.39 (s, 1H), 3.78 (s, 3H), 2.89 – 2.81 (m, 1H), 1.48 (s, 9H),

1.23 (d,  $J = 7.0$  Hz, 6H).  $^{13}\text{C NMR}$  (126 MHz,  $\text{CDCl}_3$ )  $\delta$  171.6, 149.6, 145.0, 140.5, 137.4, 127.7, 127.6, 126.2, 122.6, 120.1, 119.2, 114.3, 110.9, 109.9, 82.9, 58.7, 33.4, 33.0, 28.1, 24.3, 24.3. HRMS (APCI): calcd for  $\text{C}_{25}\text{H}_{30}\text{N}_3\text{O}_3$  [M - H]: 420.2293, Found: 420.2295.

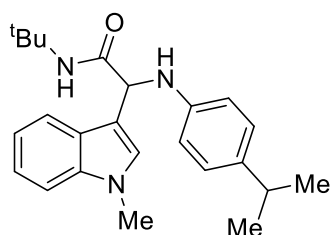

***N*-(*tert*-butyl)-2-((4-*isopropylphenyl*)amino)-2-(1-methyl-1*H*-indol-3-yl)acetamide (4g):** White solid (55.6 mg, 74% yield);  $R_f = 0.47$  (PE:EA = 4:1);  $^1\text{H NMR}$  (500 MHz,  $\text{CDCl}_3$ )  $\delta$  7.62 (d,  $J = 8.1$  Hz, 1H), 7.32 (d,  $J = 8.2$  Hz, 1H), 7.25 (t,  $J = 7.1$  Hz, 1H), 7.12 (t,  $J = 7.5$  Hz, 1H), 7.10 – 7.08 (m, 4H), 6.63 (d,  $J = 8.5$  Hz, 2H), 4.85 (s, 1H), 4.32 (brs, 1H), 3.76 (s, 3H), 2.88 – 2.80 (m, 1H), 1.38 (s, 9H), 1.23 (d,  $J = 7.0$  Hz, 6H).  $^{13}\text{C NMR}$  (126 MHz,  $\text{CDCl}_3$ )  $\delta$  171.3, 145.5, 139.9, 137.5, 127.7, 127.3, 126.3, 122.3, 119.7, 119.2, 114.2, 112.6, 109.8, 59.0, 51.2, 33.4, 33.0, 28.8, 24.3. HRMS  $m/z$  (APCI): calcd for  $\text{C}_{24}\text{H}_{30}\text{N}_3\text{O}$  [M - H] $^-$ : 376.2394, Found: 376.2399.

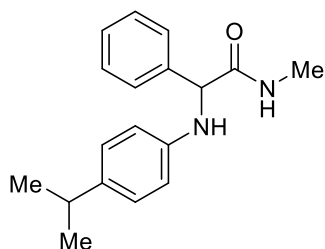

**2-((4-*isopropylphenyl*)amino)-*N*-methyl-2-phenylacetamide (5a):** Yellow solid (12.8 mg, 15% yield);  $R_f = 0.31$  (PE:EA = 1:1);  $^1\text{H NMR}$  (500 MHz,  $\text{CDCl}_3$ )  $\delta$  7.42 (d,  $J = 7.0$  Hz, 2H), 7.38 (t,  $J = 7.2$  Hz, 2H), 7.34 (t,  $J = 6.9$  Hz, 1H), 7.08 (d,  $J = 8.5$  Hz, 2H), 6.85 (d,  $J = 5.3$  Hz, 1H), 6.59 (d,  $J = 8.4$  Hz, 2H), 4.70 (s, 1H), 4.35 (s, 1H), 2.84 (d,  $J = 5.1$  Hz, 3H), 2.82 – 2.79 (m, 1H), 1.21 (d,  $J = 7.0$  Hz, 6H).  $^{13}\text{C NMR}$  (126 MHz,  $\text{CDCl}_3$ )  $\delta$  172.2, 144.9, 140.0, 139.2, 129.4, 128.7, 127.6, 127.4, 114.0, 64.8, 33.3, 26.5, 24.3. HRMS (APCI): calcd for  $\text{C}_{18}\text{H}_{21}\text{N}_2\text{O}$  [M - H] $^-$ : 281.1659, Found: 281.1662.

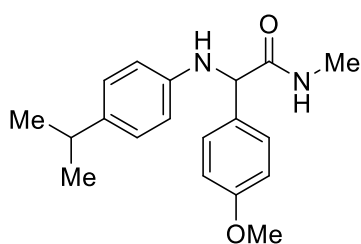

**2-((4-*isopropylphenyl*)amino)-2-(4-methoxyphenyl)-*N*-methylacetamide (5b):** Light yellow oil (31.1 mg, 50% yield);  $R_f = 0.56$  (PE:EA = 1:1);  $^1\text{H NMR}$  (500 MHz,  $\text{CDCl}_3$ )  $\delta$  7.33 (d,  $J = 8.7$  Hz, 2H), 7.07 (d,  $J = 8.5$  Hz, 2H), 6.90 (d,  $J = 8.6$  Hz, 2H), 6.85 (d,  $J = 5.1$  Hz, 1H), 6.58 (d,  $J = 8.5$  Hz, 2H), 4.65 (s, 1H), 4.31 (s, 1H), 3.80 (s, 3H), 2.84 (d,  $J = 4.9$  Hz, 3H), 2.82 – 2.79 (m, 1H), 1.21 (d,  $J = 6.9$  Hz, 6H).  $^{13}\text{C NMR}$  (126 MHz,  $\text{CDCl}_3$ )  $\delta$  172.4, 159.8, 145.0, 139.9, 131.2, 128.8, 127.4, 114.7, 113.9, 64.1, 55.5, 33.3, 26.4, 24.3, 24.3. HRMS (APCI): calcd for  $\text{C}_{19}\text{H}_{23}\text{N}_2\text{O}_2$  [M - H] $^-$ : 311.1765, Found: 311.1768.

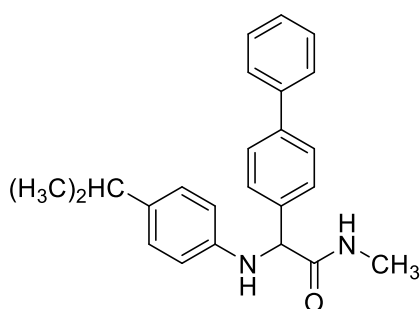

**2-([1,1'-biphenyl]-4-yl)-2-((4-*isopropylphenyl*)amino)-*N*-methylacetamide (5c):** Light yellow solid (28.7 mg, 40% yield);  $R_f = 0.29$  (PE:EA = 3:1);  $^1\text{H NMR}$  (500 MHz,  $\text{CDCl}_3$ )  $\delta$  7.60 (d,  $J = 8.0$  Hz, 2H), 7.57 (d,  $J = 7.0$  Hz, 2H), 7.49 (d,  $J = 8.0$  Hz, 2H), 7.45 (t,  $J = 7.6$  Hz, 2H), 7.36 (t,  $J = 7.3$  Hz, 1H), 7.09 (d,  $J = 8.4$  Hz, 2H), 6.88 (d,  $J = 5.2$  Hz, 1H), 6.61 (d,  $J = 8.4$  Hz, 2H), 4.75 (s, 1H), 4.39 (s, 1H), 2.87 (d,  $J = 4.9$  Hz, 3H), 2.84 – 2.80 (m, 1H), 1.21 (d,  $J = 6.9$  Hz, 6H).  $^{13}\text{C NMR}$  (126 MHz,  $\text{CDCl}_3$ )  $\delta$  172.1, 144.9, 141.7, 140.6, 140.1, 138.1, 129.0, 128.1, 128.0, 127.7, 127.4, 127.3, 114.0, 64.5, 33.4, 26.5, 24.3, 24.3. HRMS (APCI): calcd for  $\text{C}_{24}\text{H}_{25}\text{N}_2\text{O}$  [M - H] $^-$ : 357.1972, Found: 357.1974.

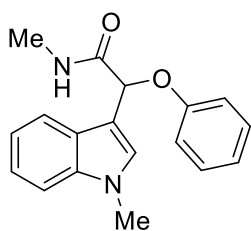

**N-methyl-2-(1-methyl-1H-indol-3-yl)-2-phenoxyacetamide (6a):** White solid (32.3 mg, 55% yield);  $R_f = 0.41$  (PE:EA = 1:1);  $^1\text{H NMR}$  (500 MHz,  $\text{CDCl}_3$ )  $\delta$  7.73 (d,  $J = 8.0$  Hz, 1H), 7.29 – 7.26 (m, 3H), 7.23 (t,  $J = 7.4$  Hz, 1H), 7.14 – 7.12 (m, 2H), 7.03 – 6.97 (m, 3H), 6.84 (d,  $J = 4.6$  Hz, 1H), 5.87 (s, 1H), 3.73 (s, 3H), 2.91 (d,  $J = 5.0$  Hz, 3H).  $^{13}\text{C NMR}$  (126 MHz,  $\text{CDCl}_3$ )  $\delta$  171.0, 157.4, 137.4, 129.8, 128.2, 126.4, 122.3, 122.1, 120.0, 120.0, 116.0, 110.3, 109.6, 76.0, 33.0, 26.2. HRMS (APCI): calcd for  $\text{C}_{18}\text{H}_{17}\text{N}_2\text{O}_2$  [ $\text{M} - \text{H}$ ]: 293.1295, Found: 293.1298.

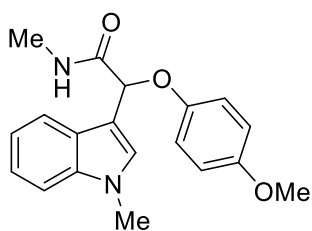

**2-(4-methoxyphenoxy)-N-methyl-2-(1-methyl-1H-indol-3-yl)acetamide (6b):** White solid (36.1 mg, 53% yield);  $R_f = 0.39$  (PE:EA = 1:1);  $^1\text{H NMR}$  (500 MHz,  $\text{CDCl}_3$ )  $\delta$  7.70 (d,  $J = 7.9$  Hz, 1H), 7.29 (d,  $J = 8.2$  Hz, 1H), 7.23 (t,  $J = 7.5$  Hz, 1H), 7.14 – 7.11 (m, 2H), 6.92 – 6.88 (m, 3H), 6.79 (d,  $J = 9.0$  Hz, 2H), 5.74 (s, 1H), 3.75 – 3.74 (m, 6H), 2.92 (d,  $J = 5.0$  Hz, 3H).  $^{13}\text{C NMR}$  (126 MHz,  $\text{CDCl}_3$ )  $\delta$  171.2, 154.9, 151.5, 137.5, 128.3, 126.5, 122.2, 120.0, 119.9, 117.3, 114.9, 110.4, 109.6, 77.0, 55.8, 33.0, 26.2. HRMS  $m/z$  (APCI): calcd for  $\text{C}_{19}\text{H}_{19}\text{N}_2\text{O}_3$  [ $\text{M} - \text{H}$ ]: 323.1401, Found: 323.1405.

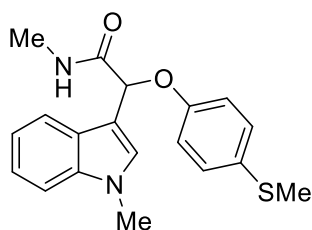

**N-methyl-2-(1-methyl-1H-indol-3-yl)-2-(4-(methylthio)phenoxy)acetamide (6c):** White solid (46.8 mg, 69% yield);  $R_f = 0.33$  (PE:EA = 1:1);  $^1\text{H NMR}$  (500 MHz,  $\text{CDCl}_3$ )  $\delta$  7.70 (d,  $J = 8.0$  Hz, 1H), 7.29 (d,  $J = 8.2$  Hz, 1H), 7.24 (d,  $J = 7.3$  Hz, 1H), 7.21 (d,  $J = 8.5$  Hz, 2H), 7.14 – 7.11 (m, 2H), 6.94 (d,  $J = 8.3$  Hz, 2H), 6.79 (d,  $J = 5.0$  Hz, 1H), 5.81 (s, 1H), 3.75 (s, 3H), 2.92 (d,  $J = 4.9$  Hz, 3H), 2.43 (s, 3H).  $^{13}\text{C NMR}$  (126 MHz,  $\text{CDCl}_3$ )  $\delta$  170.8, 155.7, 137.5, 130.8, 129.7, 128.3, 126.4, 122.3, 120.0, 119.9, 116.8, 110.1, 109.7, 76.3, 33.0, 26.2, 17.5. HRMS (APCI): calcd for  $\text{C}_{19}\text{H}_{19}\text{N}_2\text{O}_2\text{S}$  [ $\text{M} - \text{H}$ ]: 339.1173, Found: 339.1175.

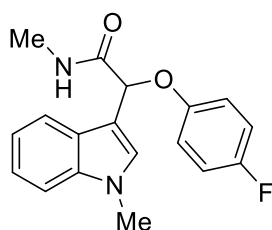

**2-(4-fluorophenoxy)-N-methyl-2-(1-methyl-1H-indol-3-yl)acetamide (6d):** White solid (57 mg, 91% yield);  $R_f = 0.41$  (PE:EA = 1:1);  $^1\text{H NMR}$  (500 MHz,  $\text{CDCl}_3$ )  $\delta$  7.67 (d,  $J = 7.8$  Hz, 1H), 7.27 – 7.26 (m, 1H), 7.22 (t,  $J = 7.5$  Hz, 1H), 7.12 – 7.10 (m, 2H), 6.91 – 6.90 (m, 4H), 6.85 (s, 1H), 5.74 (s, 1H), 3.70 (s, 3H), 2.89 (d,  $J = 5.1$  Hz, 3H);  $^{13}\text{C NMR}$  (126 MHz,  $\text{CDCl}_3$ )  $\delta$  170.8, 158.1 (d,  $J = 240.2$  Hz), 153.4, 137.4, 128.4, 126.3, 122.3, 120.0 (d,  $J = 16.4$  Hz), 117.5 (d,  $J = 6.8$  Hz), 116.2, 116.1, 109.9, 109.7, 76.8, 33.0, 26.2.  $^{19}\text{F NMR}$  (471 MHz,  $\text{CDCl}_3$ )  $\delta$  -121.9. HRMS (APCI): calcd for  $\text{C}_{18}\text{H}_{16}\text{N}_2\text{O}_2\text{F}$  [ $\text{M} - \text{H}$ ]: 311.1201, Found: 311.1202.

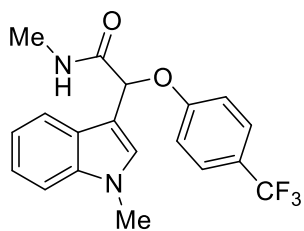

**N-methyl-2-(1-methyl-1H-indol-3-yl)-2-(4-(trifluoromethyl)phenoxy)acetamide (6e):** Yellow solid (29.3 mg, 40% yield);  $R_f = 0.30$  (PE : EA = 1:1);  $^1\text{H NMR}$  (500 MHz, Chloroform- $d$ )  $\delta$  7.69 (d,  $J = 8.1$  Hz, 1H), 7.52 (d,  $J = 8.9$  Hz, 2H), 7.30 (d,  $J = 8.2$  Hz, 1H), 7.24 (d,  $J = 8.2$  Hz, 1H), 7.16 (s, 1H), 7.14 (t,  $J = 8.1$  Hz, 1H), 7.08 (d,  $J = 8.9$  Hz, 2H), 6.73 (s, 1H), 5.91 (s, 1H), 3.76 (s, 3H), 2.92 (d,  $J = 4.9$  Hz, 3H).  $^{13}\text{C NMR}$  (126 MHz,  $\text{CDCl}_3$ )  $\delta$  170.2, 159.7, 137.5, 128.4, 127.3 (q,  $J = 3.7$  Hz), 126.2, 124.3 (q,  $J = 32.9$  Hz), 124.3 (q,  $J = 272.3$  Hz), 122.5, 120.2, 119.8, 115.9, 109.8, 109.5, 76.1, 33.1,

26.3.  $^{19}\text{F}$  NMR (471 MHz,  $\text{CDCl}_3$ )  $\delta$  -61.7. HRMS  $m/z$  (APCI): calcd for  $\text{C}_{19}\text{H}_{16}\text{N}_2\text{O}_2\text{F}_3$  [ $\text{M} - \text{H}$ ] $^-$ : 361.1169, Found: 361.1173.

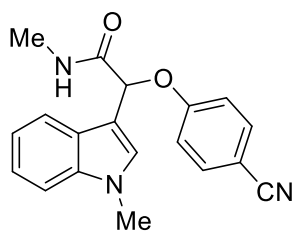

**2-(4-cyanophenoxy)-N-methyl-2-(1-methyl-1H-indol-3-yl)acetamide (6f):** White solid (41.7 mg, 65% yield);  $R_f$  = 0.45 (PE:EA = 1:1);  $^1\text{H}$  NMR (500 MHz,  $\text{CDCl}_3$ )  $\delta$  7.67 (d,  $J$  = 7.9 Hz, 1H), 7.55 (d,  $J$  = 8.5 Hz, 2H), 7.31 (d,  $J$  = 8.2 Hz, 1H), 7.25 (t,  $J$  = 7.5 Hz, 1H), 7.17 (s, 1H), 7.14 (t,  $J$  = 7.4 Hz, 1H), 7.06 (d,  $J$  = 8.5 Hz, 2H), 6.71 (s, 1H), 5.92 (s, 1H), 3.75 (s, 3H), 2.92 (d,  $J$  = 5.0 Hz, 3H).  $^{13}\text{C}$  NMR (126 MHz,  $\text{CDCl}_3$ )  $\delta$  169.9, 160.4, 137.4, 134.3, 128.5, 126.0, 122.6, 120.3, 119.6, 118.9, 116.6, 109.9, 108.9, 105.5, 76.0, 33.1, 26.4. HRMS (APCI): calcd for  $\text{C}_{19}\text{H}_{16}\text{N}_3\text{O}_2$  [ $\text{M} - \text{H}$ ] $^-$ : 318.1248, Found: 318.1250.

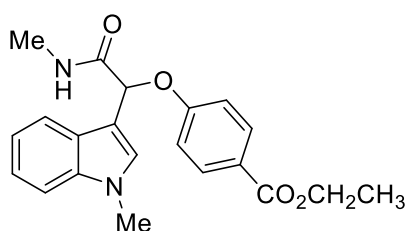

**ethyl 4-(1-(1-methyl-1H-indol-3-yl)-2-(methylamino)-2-oxoethoxy)benzoate (6g):** White solid (57.1 mg, 78% yield);  $R_f$  = 0.40 (PE:EA = 1:1);  $^1\text{H}$  NMR (500 MHz,  $\text{CDCl}_3$ )  $\delta$  7.97 (d,  $J$  = 6.7 Hz, 2H), 7.70 (d,  $J$  = 8.0 Hz, 1H), 7.29 (d,  $J$  = 8.2 Hz, 1H), 7.24 (t,  $J$  = 7.9 Hz, 1H), 7.16 (s, 1H), 7.13 (t,  $J$  = 8.8 Hz, 1H), 7.03 (d,  $J$  = 6.6 Hz, 2H), 6.75 (s, 1H), 5.94 (s, 1H), 4.33 (q,  $J$  = 7.1 Hz, 2H), 3.75 (s, 3H), 2.91 (d,  $J$  = 4.0 Hz, 3H), 1.36 (t,  $J$  = 7.2 Hz, 3H).  $^{13}\text{C}$  NMR (126 MHz,  $\text{CDCl}_3$ )  $\delta$  170.3, 166.2, 160.8, 137.4, 131.8, 128.3, 126.2, 124.3, 122.4, 120.1, 119.8, 115.5, 109.8, 109.6, 75.9, 60.9, 33.1, 26.3, 14.5. HRMS (APCI): calcd for  $\text{C}_{21}\text{H}_{21}\text{N}_2\text{O}_4$  [ $\text{M} - \text{H}$ ] $^-$ : 365.1507, Found: 365.1509.

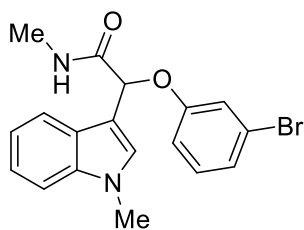

**2-(3-bromophenoxy)-N-methyl-2-(1-methyl-1H-indol-3-yl)acetamide (6h):** White solid (47.6 mg, 64% yield);  $R_f$  = 0.35 (PE:EA = 1:1);  $^1\text{H}$  NMR (500 MHz,  $\text{CDCl}_3$ )  $\delta$  7.69 (d,  $J$  = 8.2 Hz, 1H), 7.30 (d,  $J$  = 8.2 Hz, 1H), 7.24 (d,  $J$  = 8.1 Hz, 1H), 7.19 (s, 1H), 7.15 – 7.11 (m, 4H), 6.93 (s, 1H), 6.78 (s, 1H), 5.84 (s, 1H), 3.75 (s, 3H), 2.92 (d,  $J$  = 4.9 Hz, 3H).  $^{13}\text{C}$  NMR (126 MHz,  $\text{CDCl}_3$ )  $\delta$  170.4, 158.0, 137.4, 130.9, 128.4, 126.2, 125.3, 123.0, 122.4, 120.1, 119.8, 119.7, 114.5, 109.8, 109.6, 76.2, 33.0, 26.3. HRMS (APCI): calcd for  $\text{C}_{18}\text{H}_{16}\text{N}_2\text{O}_2\text{Br}$  [ $\text{M} - \text{H}$ ] $^-$ : 371.0401, Found: 371.0403.

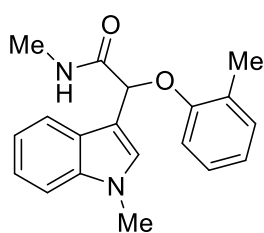

**N-methyl-2-(1-methyl-1H-indol-3-yl)-2-(o-tolyloxy)acetamide (6i):** White solid (38.2 mg, 62% yield);  $R_f$  = 0.50 (PE:EA = 1:1);  $^1\text{H}$  NMR (500 MHz,  $\text{CDCl}_3$ )  $\delta$  7.72 (d,  $J$  = 8.0 Hz, 1H), 7.29 (d,  $J$  = 8.2 Hz, 1H), 7.24 (t,  $J$  = 7.6 Hz, 1H), 7.16 (d,  $J$  = 7.5 Hz, 1H), 7.14 (s, 1H), 7.12 – 7.09 (m, 2H), 6.92 – 6.89 (m, 2H), 6.83 (d,  $J$  = 5.4 Hz, 1H), 5.84 (s, 1H), 3.75 (s, 3H), 2.93 (d,  $J$  = 4.9 Hz, 3H), 2.29 (s, 3H).  $^{13}\text{C}$  NMR (126 MHz,  $\text{CDCl}_3$ )  $\delta$  171.2, 155.6, 137.5, 131.1, 128.2, 127.3, 127.2, 126.4, 122.2, 121.8, 120.0, 119.9, 113.2, 110.5, 109.6, 76.1, 33.0, 26.2, 16.8. HRMS (APCI): calcd for  $\text{C}_{19}\text{H}_{19}\text{N}_2\text{O}_2$  [ $\text{M} - \text{H}$ ] $^-$ : 307.1452, Found: 307.1455.

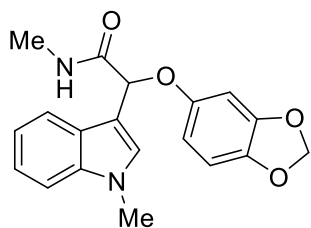

**2-(benzo[d][1,3]dioxol-5-yloxy)-N-methyl-2-(1-methyl-1H-indol-3-yl)acetamide (6j):** Yellow oil (32.4 mg, 53% yield);  $R_f = 0.15$  (PE:EA = 1:1);  $^1\text{H NMR}$  (500 MHz,  $\text{CDCl}_3$ )  $\delta$  9.73 (brs, 1H), 7.45 (d,  $J = 8.0$  Hz, 1H), 7.31 (d,  $J = 8.2$  Hz, 1H), 7.23 (t,  $J = 7.6$  Hz, 1H), 7.10 (t,  $J = 7.5$  Hz, 1H), 7.07 (s, 1H), 6.64 (s, 1H), 6.48 (s, 1H), 6.27 (d,  $J = 5.1$  Hz, 1H), 5.85 (s, 2H), 4.95 (s, 1H), 3.74 (s, 3H), 2.85 (d,  $J = 4.8$  Hz, 3H).  $^{13}\text{C NMR}$  (126 MHz,  $\text{CDCl}_3$ )  $\delta$  175.5, 151.3, 147.8, 141.0, 137.4, 128.6, 126.9, 122.1, 119.7, 119.1, 116.8, 110.2, 109.8, 109.3, 101.2, 100.8, 48.9, 33.0, 27.0. HRMS (APCI): calcd for  $\text{C}_{19}\text{H}_{17}\text{N}_2\text{O}_4$  [M - H] $^-$ : 337.1194, Found: 337.1196.

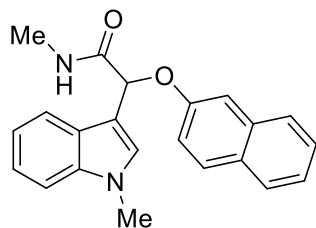

**N-methyl-2-(1-methyl-1H-indol-3-yl)-2-(naphthalen-2-yloxy)acetamide (6k):** Light yellow solid (24.9 mg, 36% yield);  $R_f = 0.50$  (PE:EA = 1:1);  $^1\text{H NMR}$  (500 MHz,  $\text{CDCl}_3$ )  $\delta$  7.78 – 7.75 (m, 3H), 7.72 (d,  $J = 8.2$  Hz, 1H), 7.44 (t,  $J = 7.5$  Hz, 1H), 7.36 (t,  $J = 7.5$  Hz, 1H), 7.31 – 7.29 (m, 2H), 7.26 – 7.23 (m, 2H), 7.19 (s, 1H), 7.14 (t,  $J = 7.5$  Hz, 1H), 6.83 (d,  $J = 5.4$  Hz, 1H), 6.03 (s, 1H), 3.76 (s, 3H), 2.93 (d,  $J = 4.9$  Hz, 3H).  $^{13}\text{C NMR}$  (126 MHz,  $\text{CDCl}_3$ )  $\delta$  170.9, 155.2, 137.5, 134.4, 129.9, 129.6, 128.2, 127.7, 127.2, 126.7, 126.5, 124.4, 122.3, 120.0, 120.0, 118.9, 110.2, 109.7, 109.3, 76.1, 33.0, 26.2. HRMS (APCI): calcd for  $\text{C}_{22}\text{H}_{19}\text{N}_2\text{O}_2$  [M - H] $^-$ : 343.1452, Found: 343.1456.

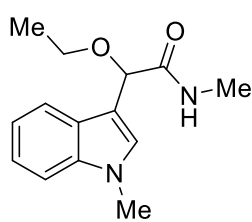

**2-ethoxy-N-methyl-2-(1-methyl-1H-indol-3-yl)acetamide (6l):** Light yellow solid (28.7 mg, 58% yield);  $R_f = 0.32$  (PE:EA = 1:1);  $^1\text{H NMR}$  (500 MHz,  $\text{CDCl}_3$ )  $\delta$  7.68 (d,  $J = 8.0$  Hz, 1H), 7.29 (d,  $J = 8.2$  Hz, 1H), 7.22 (t, 1H), 7.13 – 7.10 (m, 2H), 7.01 (s, 1H), 5.04 (s, 1H), 3.74 (s, 3H), 3.62 – 3.49 (m, 2H), 2.91 (d,  $J = 4.9$  Hz, 3H), 1.23 (t,  $J = 7.0$  Hz, 3H).  $^{13}\text{C NMR}$  (126 MHz,  $\text{CDCl}_3$ )  $\delta$  172.1, 137.5, 128.7, 126.5, 122.0, 119.9, 119.6, 111.0, 109.5, 76.6, 64.6, 32.9, 25.9, 15.4. HRMS (APCI): calcd for  $\text{C}_{14}\text{H}_{17}\text{N}_2\text{O}_2$  [M - H] $^-$ : 245.1296, Found: 245.1296.

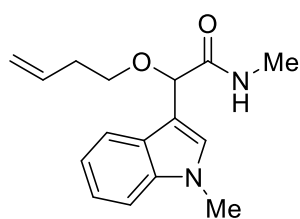

**2-(but-3-en-1-yloxy)-N-methyl-2-(1-methyl-1H-indol-3-yl)acetamide (6m):** Light yellow oil: (29.9 mg, 55% yield);  $R_f = 0.30$  (PE:EA = 1:1);  $^1\text{H NMR}$  (500 MHz,  $\text{CDCl}_3$ )  $\delta$  7.67 (d,  $J = 8.0$  Hz, 1H), 7.29 (d,  $J = 8.2$  Hz, 1H), 7.22 (t,  $J = 7.6$  Hz, 1H), 7.12 – 7.09 (m, 2H), 6.98 (s, 1H), 5.84 – 5.76 (m, 1H), 5.10 (d,  $J = 18.8$  Hz, 1H), 5.06 (d,  $J = 9.5$  Hz, 1H), 5.03 (s, 1H), 3.75 (s, 3H), 3.63 – 3.58 (m, 1H), 3.52 – 3.47 (m, 1H), 2.90 (d,  $J = 5.0$  Hz, 3H), 2.37 (q,  $J = 6.6$  Hz, 2H).  $^{13}\text{C NMR}$  (126 MHz,  $\text{CDCl}_3$ )  $\delta$  171.9, 137.5, 135.3, 128.8, 126.5, 122.1, 120.0, 119.7, 116.9, 110.8, 109.6, 76.9, 68.4, 34.3, 32.9, 25.9. HRMS  $m/z$  (ESI): calcd for  $\text{C}_{16}\text{H}_{20}\text{N}_2\text{O}_2\text{Na}$  [M + Na] $^+$ : 295.1417, Found: 295.1420.

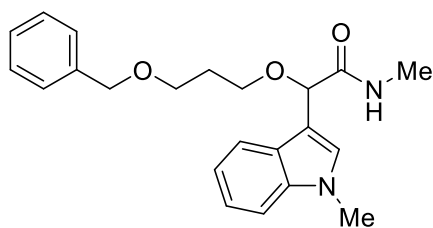

**2-(3-(benzyloxy)propoxy)-N-methyl-2-(1-methyl-1H-indol-3-yl)acetamide (6n):** Light yellow oil: (39.5 mg, 54% yield);  $R_f = 0.23$  (PE:EA = 1:1);  $^1\text{H NMR}$  (500 MHz,  $\text{CDCl}_3$ )  $\delta$  7.64 (d,  $J = 7.9$  Hz, 1H), 7.34 – 7.31 (m, 2H), 7.29 – 7.25 (m, 4H), 7.21 (t,  $J = 7.6$  Hz, 1H), 7.10 – 7.07 (m, 2H), 7.04 (s, 1H), 5.00 (s, 1H), 4.42 (s, 2H), 3.72 (s, 3H), 3.66 – 3.59 (m, 3H), 3.55 – 3.51 (m, 1H), 2.80 (d,  $J = 4.7$  Hz, 3H), 1.91 (p,  $J = 6.3$  Hz, 2H).

$^{13}\text{C}$  NMR (126 MHz,  $\text{CDCl}_3$ )  $\delta$  172.0, 138.4, 137.5, 128.8, 128.5, 127.8, 127.8, 126.5, 122.0, 120.0, 119.6, 110.9, 109.5, 77.0, 73.0, 67.4, 66.4, 32.9, 30.0, 25.9. HRMS (APCI): calcd for  $\text{C}_{22}\text{H}_{25}\text{N}_2\text{O}_3$  [M - H] $^-$ : 365.1871, Found: 365.1873.

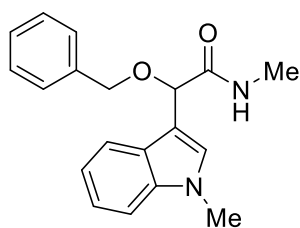

**2-(benzyloxy)-N-methyl-2-(1-methyl-1H-indol-3-yl)acetamide**

**(6o):** Light yellow solid (41.9 mg, 68% yield);  $R_f$  = 0.35 (PE:EA = 1:1);  $^1\text{H}$  NMR (500 MHz,  $\text{CDCl}_3$ )  $\delta$  7.68 (d,  $J$  = 8.0 Hz, 1H), 7.37 – 7.34 (m, 2H), 7.33 – 7.30 (m, 4H), 7.24 (d,  $J$  = 7.9 Hz, 1H), 7.15 (s, 1H), 7.12 (t,  $J$  = 7.6 Hz, 1H), 7.02 (s, 1H), 5.14 (s, 1H), 4.61 (d,  $J$  = 11.5 Hz, 1H), 4.46 (d,  $J$  = 11.5 Hz, 1H), 3.77 (s, 3H), 2.90 (d,  $J$  = 5.0 Hz, 3H).  $^{13}\text{C}$  NMR (126 MHz,  $\text{CDCl}_3$ )  $\delta$  171.7, 137.7, 137.6, 129.3, 128.6, 128.3, 128.1, 126.5, 122.1, 120.0, 119.8, 110.4, 109.6, 76.0, 70.7, 33.0, 26.0. HRMS (APCI): calcd for  $\text{C}_{19}\text{H}_{19}\text{N}_2\text{O}_2$  [M - H] $^-$ : 307.1452, Found: 307.1453.

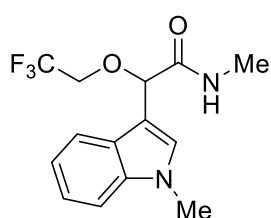

**N-methyl-2-(1-methyl-1H-indol-3-yl)-2-(2,2,2-trifluoroethoxy)**

**acetamide (6p):** Yellow oil (34.1 mg, 57% yield);  $R_f$  = 0.25 (PE:EA = 1:1);  $^1\text{H}$  NMR (500 MHz,  $\text{CDCl}_3$ )  $\delta$  7.61 (d,  $J$  = 8.0 Hz, 1H), 7.32 (d,  $J$  = 8.2 Hz, 1H), 7.25 (t,  $J$  = 7.6 Hz, 1H), 7.18 (s, 1H), 7.13 (t,  $J$  = 7.4 Hz, 1H), 6.90 (s, 1H), 5.21 (s, 1H), 3.82 – 3.80 (m, 2H), 3.77 (s, 3H), 2.93 (d,  $J$  = 5.0 Hz, 3H).  $^{13}\text{C}$  NMR (126 MHz,  $\text{CDCl}_3$ )  $\delta$  170.2, 137.7, 130.1, 126.1, 124.1 (q,  $J$  = 278.6 Hz), 122.5, 120.2, 119.6, 109.8, 108.4, 77.5, 65.2 (q,  $J$  = 35.8 Hz), 33.0, 26.1.  $^{19}\text{F}$  NMR (471 MHz,  $\text{CDCl}_3$ )  $\delta$  -73.7. HRMS (APCI): calcd for  $\text{C}_{14}\text{H}_{14}\text{N}_2\text{O}_2\text{F}_3$  [M - H] $^-$ : 299.1013, Found: 299.1016.

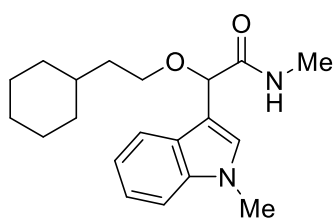

**2-(2-cyclohexylethoxy)-N-methyl-2-(1-methyl-1H-indol-3-yl)**

**acetamide (6q):** Yellow oil (43.8 mg, 67% yield);  $R_f$  = 0.51 (PE:EA = 1:1);  $^1\text{H}$  NMR (500 MHz,  $\text{CDCl}_3$ )  $\delta$  7.66 (d,  $J$  = 8.0 Hz, 1H), 7.28 (d,  $J$  = 8.2 Hz, 1H), 7.22 (t,  $J$  = 7.6 Hz, 1H), 7.12 – 7.09 (m, 2H), 6.97 (s, 1H), 5.00 (s, 1H), 3.75 (s, 3H), 3.57 – 3.45 (m, 2H), 2.91 (d,  $J$  = 5.1 Hz, 3H), 1.67 – 1.62 (m, 5H), 1.54 – 1.46 (m, 2H), 1.36 – 1.34 (m, 1H), 1.21 – 1.10 (m, 3H), 0.91 – 0.83 (m, 2H).  $^{13}\text{C}$  NMR (126 MHz,  $\text{CDCl}_3$ )  $\delta$  172.2, 137.5, 128.7, 126.6, 122.0, 120.0, 119.6, 111.1, 109.5, 77.0, 67.3, 37.3, 34.7, 33.6, 33.3, 32.9, 26.6, 26.4, 26.3, 26.0. HRMS (APCI): calcd for  $\text{C}_{20}\text{H}_{27}\text{N}_2\text{O}_2$  [M - H] $^-$ : 327.2078, Found: 327.2080.

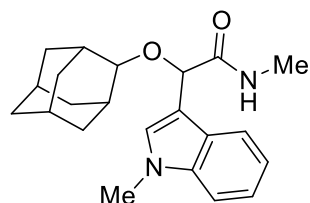

**2-(((1r,3r,5r,7r)-adamantan-2-yl)oxy)-N-methyl-2-(1-methyl-1H-**

**indol-3-yl)acetamide (6r):** White solid (30.1 mg, 43% yield);  $R_f$  = 0.52 (PE:EA = 1:1);  $^1\text{H}$  NMR (500 MHz,  $\text{CDCl}_3$ )  $\delta$  7.72 (d,  $J$  = 8.0 Hz, 1H), 7.28 (d,  $J$  = 8.4 Hz, 1H), 7.21 (t,  $J$  = 7.6 Hz, 1H), 7.11 – 7.07 (m, 3H), 5.17 (s, 1H), 3.76 (s, 3H), 3.60 (s, 1H), 2.90 (d,  $J$  = 4.9 Hz, 3H), 2.12 – 2.06 (m, 3H), 1.85 – 1.74 (m, 5H), 1.70 (s, 2H), 1.57 – 1.49 (m, 4H).  $^{13}\text{C}$  NMR (126 MHz,  $\text{CDCl}_3$ )  $\delta$  172.9, 137.5, 128.5, 126.7, 121.9, 120.3, 119.5, 111.7, 109.5, 79.6, 73.6, 37.6, 36.6, 36.4, 32.9, 32.8, 32.2, 31.9, 31.2, 27.5, 27.4, 26.1. HRMS (APCI): calcd for  $\text{C}_{22}\text{H}_{27}\text{N}_2\text{O}_2$  [M - H] $^-$ : 351.2078, Found: 351.2082.



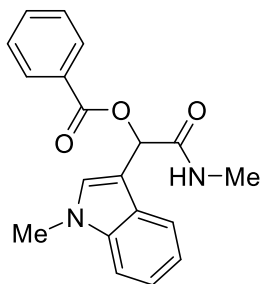

**1-(1-methyl-1H-indol-3-yl)-2-(methylamino)-2-oxoethyl benzoate**

**(7a):** White solid (43.1 mg, 67% yield);  $R_f = 0.32$  (PE:EA = 1:1);  $^1\text{H NMR}$  (500 MHz,  $\text{CDCl}_3$ )  $\delta$  8.07 (d,  $J = 7.5$  Hz, 2H), 7.74 (d,  $J = 8.0$  Hz, 1H), 7.55 (t,  $J = 7.4$  Hz, 1H), 7.42 (t,  $J = 7.6$  Hz, 2H), 7.32 (d,  $J = 8.3$  Hz, 1H), 7.30 (s, 1H), 7.27 (t,  $J = 7.8$  Hz, 1H), 7.16 (t,  $J = 7.4$  Hz, 1H), 6.71 (s, 1H), 6.32 (s, 1H), 3.77 (s, 3H), 2.90 (d,  $J = 4.9$  Hz, 3H).  $^{13}\text{C NMR}$  (126 MHz,  $\text{CDCl}_3$ )  $\delta$  169.5, 165.7, 137.3, 133.5, 130.0, 130.0, 129.8, 128.6, 126.4, 122.4, 120.3, 119.6, 109.8, 109.0, 70.4, 33.0, 26.5. HRMS (ESI): calcd for  $\text{C}_{19}\text{H}_{17}\text{N}_2\text{O}_3$  [ $\text{M} - \text{H}$ ]: 321.1245, Found: 321.1247.

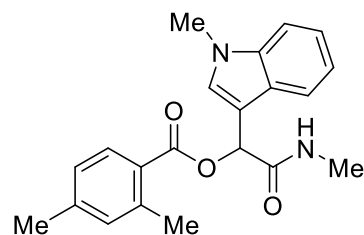

**1-(1-methyl-1H-indol-3-yl)-2-(methylamino)-2-oxoethyl 2,4-**

**dimethylbenzoate (7b):** White solid (53.4 mg, 76% yield);  $R_f = 0.45$  (PE:EA = 1:1);  $^1\text{H NMR}$  (500 MHz,  $\text{CDCl}_3$ )  $\delta$  7.85 (d,  $J = 7.9$  Hz, 1H), 7.72 (d,  $J = 7.9$  Hz, 1H), 7.31 (d,  $J = 8.2$  Hz, 1H), 7.28 (s, 1H), 7.24 (d,  $J = 8.8$  Hz, 1H), 7.15 (t,  $J = 7.4$  Hz, 1H), 7.03 (s, 1H), 7.00 (d,  $J = 8.0$  Hz, 1H), 6.66 (s, 1H), 6.32 (s, 1H),

3.76 (s, 3H), 2.89 (d,  $J = 4.9$  Hz, 3H), 2.56 (s, 3H), 2.32 (s, 3H).  $^{13}\text{C NMR}$  (126 MHz,  $\text{CDCl}_3$ )  $\delta$  169.8, 166.3, 143.1, 141.0, 137.3, 132.7, 131.1, 130.0, 126.6, 126.4, 126.1, 122.3, 120.2, 119.6, 109.7, 109.2, 69.9, 33.0, 26.5, 21.9, 21.5. HRMS (APCI): calcd for  $\text{C}_{21}\text{H}_{21}\text{N}_2\text{O}_3$  [ $\text{M} - \text{H}$ ]: 349.1558, Found: 349.1560.

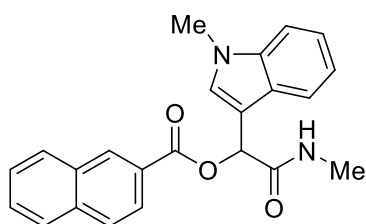

**1-(1-methyl-1H-indol-3-yl)-2-(methylamino)-2-oxoethyl 2-**

**naphthoate (7c):** White solid (44.3 mg, 60% yield);  $R_f = 0.29$  (PE:EA = 1:1);  $^1\text{H NMR}$  (500 MHz,  $\text{CDCl}_3$ )  $\delta$  8.62 (s, 1H), 8.06 (d,  $J = 8.7$  Hz, 1H), 7.90 (d,  $J = 8.7$  Hz, 1H), 7.84 (d,  $J = 8.4$  Hz, 2H), 7.78 (d,  $J = 7.9$  Hz, 1H), 7.57 (t,  $J = 7.6$  Hz, 1H), 7.51 (t,  $J = 7.5$  Hz, 1H), 7.32 (d,  $J = 9.5$  Hz, 2H), 7.26 (t,  $J = 7.5$  Hz, 1H),

7.17 (t,  $J = 7.5$  Hz, 1H), 6.77 (s, 1H), 6.34 (s, 1H), 3.77 (s, 3H), 2.92 (d,  $J = 4.9$  Hz, 3H).  $^{13}\text{C NMR}$  (126 MHz,  $\text{CDCl}_3$ )  $\delta$  169.6, 166.0, 137.4, 135.8, 132.5, 131.7, 130.0, 129.5, 128.6, 128.4, 127.9, 127.0, 126.9, 126.5, 125.4, 122.5, 120.3, 119.6, 109.8, 109.0, 70.5, 33.1, 26.5. HRMS (APCI): calcd for  $\text{C}_{23}\text{H}_{19}\text{N}_2\text{O}_3$  [ $\text{M} - \text{H}$ ]: 371.1401, Found: 371.1406.

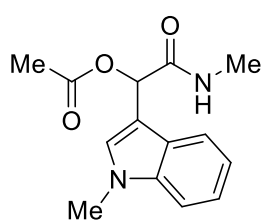

**1-(1-methyl-1H-indol-3-yl)-2-(methylamino)-2-oxoethyl acetate (7d):**

Light Yellow solid (36.4 mg, 70% yield);  $R_f = 0.25$  (PE:EA = 1:1);  $^1\text{H NMR}$  (500 MHz,  $\text{CDCl}_3$ )  $\delta$  7.65 (d,  $J = 8.0$  Hz, 1H), 7.32 (d,  $J = 8.2$  Hz, 1H), 7.26 (t,  $J = 6.3$  Hz, 1H), 7.23 (s, 1H), 7.15 (t,  $J = 7.5$  Hz, 1H), 6.44 (s, 1H), 6.27 (s, 1H), 3.76 (s, 3H), 2.87 (d,  $J = 5.0$  Hz, 3H), 2.14 (s, 3H).

$^{13}\text{C NMR}$  (126 MHz,  $\text{CDCl}_3$ )  $\delta$  170.0, 169.5, 137.2, 130.0, 126.2, 122.4, 120.2, 119.5, 109.8, 109.0, 69.7, 33.0, 26.4, 21.2. HRMS (APCI): calcd for  $\text{C}_{14}\text{H}_{15}\text{N}_2\text{O}_3$  [ $\text{M} - \text{H}$ ]: 259.1088, Found: 259.1091.

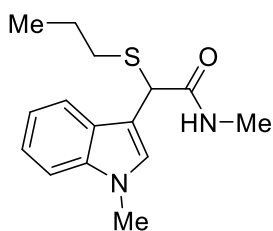

***N*-methyl-2-(1-methyl-1*H*-indol-3-yl)-2-(propylthio)acetamide (8a):**

Yellow solid (32.1 mg, 58% yield);  $R_f = 0.44$  (PE:EA = 1:1);  $^1\text{H NMR}$  (500 MHz,  $\text{CDCl}_3$ )  $\delta$  7.70 (d,  $J = 7.9$  Hz, 1H), 7.30 (d,  $J = 8.2$  Hz, 1H), 7.24 (t,  $J = 8.2$  Hz, 1H), 7.14 (t,  $J = 7.5$  Hz, 1H), 7.11 (s, 1H), 6.60 (s, 1H), 4.86 (s, 1H), 3.76 (s, 3H), 2.85 (d,  $J = 4.9$  Hz, 3H), 2.69 – 2.63 (m, 1H), 2.60 – 2.54 (m, 1H), 1.71 – 1.62 (m, 2H), 0.99 (t,  $J = 7.4$  Hz, 3H).

$^{13}\text{C NMR}$  (126 MHz,  $\text{CDCl}_3$ )  $\delta$  171.7, 137.3, 127.8, 126.7, 122.4, 119.8, 119.6, 110.3, 109.6, 46.8, 34.8, 33.0, 26.8, 22.7, 13.7. HRMS (APCI): calcd for  $\text{C}_{15}\text{H}_{19}\text{N}_2\text{OS}$  [ $\text{M} - \text{H}$ ] $^-$ : 275.1224, Found: 275.1228.

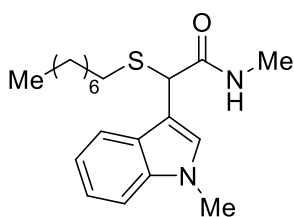

***N*-methyl-2-(1-methyl-1*H*-indol-3-yl)-2-(octylthio)acetamide (8b):**

White solid (19.3 mg, 28% yield);  $R_f = 0.35$  (PE:EA = 1:1);  $^1\text{H NMR}$  (500 MHz,  $\text{CDCl}_3$ )  $\delta$  7.70 (d,  $J = 8.0$  Hz, 1H), 7.30 (d,  $J = 8.2$  Hz, 1H), 7.24 (t,  $J = 7.9$  Hz, 1H), 7.14 (t,  $J = 7.4$  Hz, 1H), 7.11 (s, 1H), 6.61 (s, 1H), 4.86 (s, 1H), 3.76 (s, 3H), 2.85 (d,  $J = 4.9$  Hz, 3H), 2.69 – 2.56 (m, 2H), 1.64 – 1.60 (m, 2H), 1.38 – 1.35 (m, 2H), 1.29 – 1.25 (m, 8H),

0.87 (t,  $J = 6.8$  Hz, 3H).  $^{13}\text{C NMR}$  (126 MHz,  $\text{CDCl}_3$ )  $\delta$  171.6, 137.3, 127.8, 126.7, 122.4, 119.7, 119.6, 110.3, 109.6, 46.8, 33.0, 32.8, 31.9, 29.3, 29.3, 29.0, 26.8, 22.8, 14.2. HRMS (APCI): calcd for  $\text{C}_{20}\text{H}_{29}\text{N}_2\text{OS}$  [ $\text{M} - \text{H}$ ] $^-$ : 345.2006, Found: 345.2010.

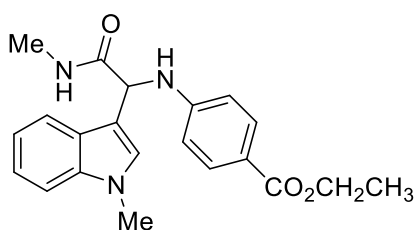

**ethyl 4-((1-(1-methyl-1*H*-indol-3-yl)-2-(methylamino) -**

**2-oxoethyl)amino)benzoate (10a):** Yellow solid (63.5 mg,

90% yield);  $R_f = 0.28$  (PE:EA = 1:1);  $^1\text{H NMR}$  (500 MHz,  $\text{CDCl}_3$ )  $\delta$  7.85 (d,  $J = 6.8$  Hz, 2H), 7.62 (d,  $J = 7.9$  Hz, 1H), 7.33 (d,  $J = 8.3$  Hz, 1H), 7.27 (t,  $J = 7.3$  Hz, 1H), 7.15 (t,  $J = 7.5$  Hz, 1H), 7.10 (s, 1H), 6.65 – 6.63 (m, 1H), 6.60 (d,  $J =$

7.0 Hz, 2H), 5.23 (s, 1H), 5.16 (s, 1H), 4.29 (q,  $J = 7.2$  Hz, 2H), 3.77 – 3.71 (m, 3H), 2.83 (d,  $J = 4.6$  Hz, 3H), 1.34 (t,  $J = 7.1$  Hz, 3H).  $^{13}\text{C NMR}$  (126 MHz,  $\text{CDCl}_3$ )  $\delta$  171.8, 166.8, 150.7, 137.4, 131.5, 127.9, 126.1, 122.5, 120.2, 120.1, 118.8, 112.7, 111.2, 109.9, 60.4, 55.8, 33.0, 26.6, 14.5. HRMS (APCI): calcd for  $\text{C}_{21}\text{H}_{22}\text{N}_3\text{O}_3$  [ $\text{M} - \text{H}$ ] $^-$ : 364.1667, Found: 364.1671.

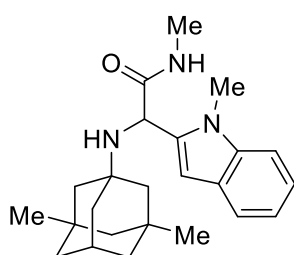

**2-(((1*r*,3*R*,5*S*,7*r*)-3,5-dimethyladamantan-1-yl)amino)-*N*-methyl-**

**2-(1-methyl-1*H*-indol-2-yl)acetamide(10b):** Yellow oil (67.5 mg, 89%

yield);  $R_f = 0.35$  (PE:EA = 1:1);  $^1\text{H NMR}$  (500 MHz,  $\text{CDCl}_3$ )  $\delta$  8.04 (d,  $J = 5.3$  Hz, 1H), 7.67 (d,  $J = 8.0$  Hz, 1H), 7.28 (d,  $J = 8.4$  Hz, 1H), 7.22 (t,  $J = 7.5$  Hz, 1H), 7.12 (t,  $J = 7.4$  Hz, 1H), 6.99 (s, 1H), 4.74 (s, 1H), 3.72 (s, 3H), 2.91 (d,  $J = 5.1$  Hz, 3H), 2.15 (s, 1H), 1.63 (d,  $J = 12.3$  Hz, 2H), 1.44 – 1.39 (m, 2H), 1.34 – 1.26 (m, 6H), 1.21 (d,  $J = 11.8$

Hz, 1H), 1.16 – 1.09 (m, 2H), 0.85 (s, 6H).  $^{13}\text{C NMR}$  (126 MHz,  $\text{CDCl}_3$ )  $\delta$  175.6, 137.3, 127.2, 126.1, 122.0, 119.4, 119.4, 114.9, 109.6, 53.7, 52.6, 50.9, 49.2, 49.0, 42.9, 42.9, 41.4, 32.8, 32.5, 32.5, 30.4, 30.3, 25.9. HRMS (APCI): calcd for  $\text{C}_{24}\text{H}_{32}\text{N}_3\text{O}$  [ $\text{M} - \text{H}$ ] $^-$ : 378.2551, Found: 378.2556.

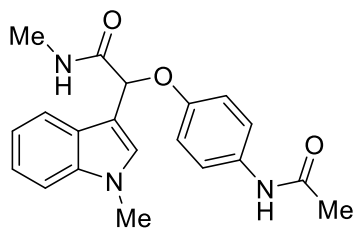

**2-(4-acetamidophenoxy)-*N*-methyl-2-(1-methyl-1*H*-indol-3-yl)acetamide (10c):** White solid (41.9 mg, 60% yield);  $^1\text{H}$  NMR (500 MHz,  $\text{DMSO-}d_6$ )  $\delta$  9.75 (s, 1H), 8.26 (d,  $J = 4.9$  Hz, 1H), 7.72 (d,  $J = 7.9$  Hz, 1H), 7.42 – 7.39 (m, 4H), 7.15 (t,  $J = 7.6$  Hz, 1H), 7.04 (t,  $J = 7.5$  Hz, 1H), 6.94 (d,  $J = 8.5$  Hz, 2H), 5.79 (s, 1H), 3.75 (s, 3H), 2.65 (d,  $J = 4.6$  Hz, 3H), 1.98 (s, 3H).  $^{13}\text{C}$  NMR (126 MHz,  $\text{DMSO-}d_6$ )  $\delta$  169.7, 167.7, 153.0, 136.7, 133.0, 129.5, 126.0, 121.4, 120.4, 119.7, 119.1, 115.8, 110.0, 109.8, 74.4, 32.4, 25.6, 23.8. HRMS (APCI): calcd for  $\text{C}_{20}\text{H}_{20}\text{N}_3\text{O}_3$  [ $\text{M} - \text{H}$ ]: 350.1510, Found:350.1515.

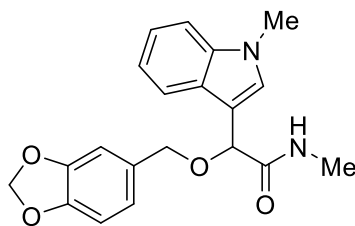

**2-(benzo[d][1,3]dioxol-5-ylmethoxy)-*N*-methyl-2-(1-methyl-1*H*-indol-3-yl)acetamide (10d):** Yellow oil (52.8 mg, 75% yield);  $R_f = 0.15$  (PE:EA = 1:1);  $^1\text{H}$  NMR (500 MHz,  $\text{CDCl}_3$ )  $\delta$  7.66 (d,  $J = 7.9$  Hz, 1H), 7.31 (d,  $J = 8.2$  Hz, 1H), 7.24 (t,  $J = 7.6$  Hz, 1H), 7.14 (s, 1H), 7.11 (d,  $J = 7.8$  Hz, 1H), 6.98 (s, 1H), 6.80 (s, 1H), 6.77 (d,  $J = 7.9$  Hz, 1H), 6.73 (d,  $J = 7.8$  Hz, 1H), 5.96 (s, 2H), 5.10 (s, 1H), 4.49 (d,  $J = 11.3$  Hz, 1H), 4.34 (d,  $J = 11.3$  Hz, 1H), 3.77 (s, 3H), 2.89 (d,  $J = 5.0$  Hz, 3H).  $^{13}\text{C}$  NMR (126 MHz,  $\text{CDCl}_3$ )  $\delta$  171.7, 147.9, 147.5, 137.6, 131.5, 129.3, 126.5, 122.2, 122.0, 120.0, 119.8, 110.4, 109.6, 109.0, 108.3, 101.2, 75.7, 70.5, 33.0, 26.0. HRMS (APCI): calcd for  $\text{C}_{20}\text{H}_{19}\text{N}_2\text{O}_4$  [ $\text{M} - \text{H}$ ]: 351.1350, Found:351.1354.

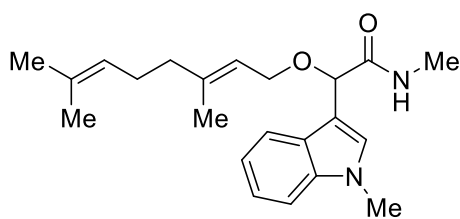

**(*E*)-2-((3,7-dimethylocta-2,6-dien-1-yl)oxy)-*N*-methyl-2-(1-methyl-1*H*-indol-3-yl)acetamide (10e):** Yellow oil (47.6 mg, 67% yield);  $R_f = 0.51$  (PE:EA = 1:1);  $^1\text{H}$  NMR (500 MHz,  $\text{CDCl}_3$ )  $\delta$  7.68 (d,  $J = 8.0$  Hz, 1H), 7.26 (t,  $J = 7.4$  Hz, 1H), 7.20 (t,  $J = 7.6$  Hz, 1H), 7.10 – 7.08 (m, 2H), 6.97 (s, 1H), 5.35 (t,  $J = 6.9$  Hz, 1H), 5.08 – 5.06 (m, 2H), 4.09 – 3.98 (m, 2H), 3.74 (s, 3H), 2.89 (d,  $J = 5.0$  Hz, 3H), 2.10 – 2.02 (m, 4H), 1.68 (s, 3H), 1.60 (s, 3H), 1.56 (s, 3H).  $^{13}\text{C}$  NMR (126 MHz,  $\text{CDCl}_3$ )  $\delta$  172.1, 141.1, 137.5, 131.9, 128.8, 126.7, 124.0, 122.0, 120.4, 120.0, 119.7, 111.0, 109.5, 75.7, 65.5, 39.7, 32.9, 26.5, 25.9, 25.8, 17.8, 16.7. HRMS (APCI): calcd for  $\text{C}_{22}\text{H}_{29}\text{N}_2\text{O}_2$  [ $\text{M} - \text{H}$ ]: 353.2235, Found:353.2238.

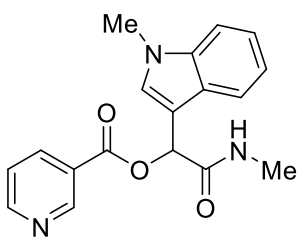

**1-(1-methyl-1*H*-indol-3-yl)-2-(methylamino)-2-oxoethyl nicotinate (10f):** White solid (38.4 mg, 59% yield);  $^1\text{H}$  NMR (500 MHz,  $\text{CD}_3\text{OD}$ )  $\delta$  9.12 (s, 1H), 8.73 (d,  $J = 4.9$  Hz, 1H), 8.41 (d,  $J = 8.0$  Hz, 1H), 7.62 (d,  $J = 8.0$  Hz, 1H), 7.57 – 7.55 (m, 1H), 7.35 (d,  $J = 8.2$  Hz, 1H), 7.23 (s, 1H), 7.17 (t,  $J = 7.6$  Hz, 1H), 7.04 (t,  $J = 7.5$  Hz, 1H), 4.89 (s, 1H), 3.78 (s, 3H), 2.82 (d,  $J = 4.2$  Hz, 3H).  $^{13}\text{C}$  NMR (126 MHz,  $\text{CD}_3\text{OD}$ )  $\delta$  174.7, 167.8, 153.7, 151.3, 139.2, 138.9, 130.8, 128.7, 127.7, 125.2, 122.9, 120.6, 120.4, 111.3, 110.5, 78.9, 32.8, 26.1. HRMS (APCI): calcd for  $\text{C}_{18}\text{H}_{16}\text{N}_3\text{O}_3$  [ $\text{M} - \text{H}$ ]: 322.1197, Found:322.1199.

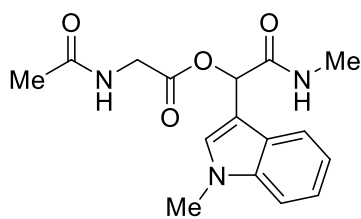

**1-(1-methyl-1H-indol-3-yl)-2-(methylamino)-2-oxoethyl acetylglycinate (10g):** White solid (34.8 mg, 55% yield);  $^1\text{H}$  NMR (500 MHz, DMSO- $d_6$ )  $\delta$  8.36 (s, 1H), 8.13 (s, 1H), 7.61 (d,  $J = 8.0$  Hz, 1H), 7.43 (d,  $J = 8.4$  Hz, 1H), 7.41 (s, 1H), 7.18 (t,  $J = 7.6$  Hz, 1H), 7.06 (t,  $J = 7.5$  Hz, 1H), 6.15 (s, 1H), 3.99 – 3.94 (m, 1H), 3.87 – 3.83 (m, 1H), 3.77 (s, 3H), 2.62 (d,  $J = 4.6$  Hz, 3H), 1.85 (s, 3H).  $^{13}\text{C}$  NMR (126 MHz, DMSO- $d_6$ )  $\delta$  170.0, 169.6, 168.4, 136.7, 130.0, 126.0, 121.6, 119.4, 110.0, 108.4, 70.0, 40.7, 32.5, 25.6, 22.3. HRMS (ESI): calcd for  $\text{C}_{16}\text{H}_{18}\text{N}_3\text{O}_4$  [ $\text{M} - \text{H}$ ] $^-$ : 316.1303, Found:316.1310.

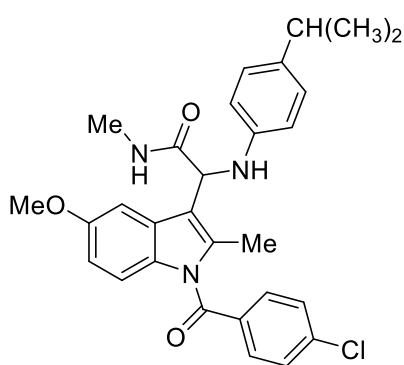

**2-(1-(4-chlorobenzoyl)-5-methoxy-2-methyl-1H-indol-3-yl)-2-((4-isopropylphenyl)amino)-N-methylacetamide (10h):** Light yellow solid (79.6 mg, 80% yield);  $R_f = 0.45$  (PE:EA = 2:1);  $^1\text{H}$  NMR (500 MHz,  $\text{CDCl}_3$ )  $\delta$  7.66 (d,  $J = 8.1$  Hz, 2H), 7.47 (d,  $J = 8.1$  Hz, 2H), 7.10 (d,  $J = 8.0$  Hz, 2H), 7.05 (s, 1H), 7.03 (d,  $J = 5.0$  Hz, 1H), 6.88 (d,  $J = 9.0$  Hz, 1H), 6.68 (d,  $J = 10.2$  Hz, 1H), 6.63 (d,  $J = 8.1$  Hz, 2H), 4.98 (s, 1H), 4.44 (s, 1H), 3.80 (s, 3H), 2.89 (d,  $J = 4.9$  Hz, 3H), 2.86 – 2.81 (m, 1H), 2.46 (s, 3H), 1.22 (d,  $J = 6.9$  Hz, 6H).  $^{13}\text{C}$  NMR (126 MHz,  $\text{CDCl}_3$ )  $\delta$  171.6, 168.5, 156.0, 145.2, 140.2, 139.9, 136.9, 133.6, 131.5, 131.3, 129.4, 128.6, 127.5, 116.6, 115.1, 114.0, 111.5, 102.4, 56.8, 55.8, 33.4, 26.5, 24.3, 24.3, 13.8. HRMS (APCI): calcd for  $\text{C}_{29}\text{H}_{29}\text{N}_3\text{O}_3\text{Cl}$  [ $\text{M} - \text{H}$ ] $^-$ : 502.1903, Found:502.1897.

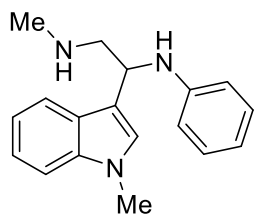

**$N^2$ -methyl-1-(1-methyl-1H-indol-3-yl)- $N^1$ -phenylethane-1,2-diamine (11):** Colorless solid (79.6 mg, 66% yield);  $R_f = 0.50$  (DCM:MeOH = 6:1);  $^1\text{H}$  NMR (500 MHz,  $\text{CDCl}_3$ )  $\delta$  7.71 (d,  $J = 7.9$  Hz, 1H), 7.32 (d,  $J = 8.2$  Hz, 1H), 7.26 (t,  $J = 7.6$  Hz, 1H), 7.14 (t,  $J = 7.5$  Hz, 1H), 7.10 (t,  $J = 8.0$  Hz, 2H), 6.99 (s, 1H), 6.67 – 6.63 (m, 3H), 4.86 (t,  $J = 5.6$  Hz, 1H), 4.71 (brs, 1H), 3.71 (s, 3H), 3.09 (d,  $J = 5.5$  Hz, 2H), 2.45 (s, 3H).  $^{13}\text{C}$  NMR (126 MHz,  $\text{CDCl}_3$ )  $\delta$  148.1, 137.6, 129.2, 127.2, 126.4, 121.9, 119.2, 119.1, 117.2, 115.0, 113.6, 109.6, 57.0, 50.8, 36.6, 32.9. HRMS (APCI): calcd for  $\text{C}_{18}\text{H}_{20}\text{N}_3$  [ $\text{M} - \text{H}$ ] $^-$ : 278.1663, Found:278.1666.

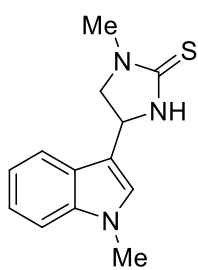

**1-methyl-4-(1-methyl-1H-indol-3-yl)imidazolidine-2-thione (12):** Canary yellow (23.6 mg, 21% yield);  $R_f = 0.52$  (PE:EA = 1:1),  $^1\text{H}$  NMR (500 MHz,  $\text{CDCl}_3$ )  $\delta$  7.66 (d,  $J = 8.0$  Hz, 1H), 7.33 (d,  $J = 8.2$  Hz, 1H), 7.28 (d,  $J = 8.3$  Hz, 1H), 7.16 (t,  $J = 7.5$  Hz, 1H), 7.13 (s, 1H), 5.21 (t,  $J = 7.8$  Hz, 1H), 3.93 – 3.90 (m, 1H), 3.81 – 3.78 (m, 1H), 3.77 (s, 3H), 2.96 (s, 3H).  $^{13}\text{C}$  NMR (126 MHz,  $\text{CDCl}_3$ )  $\delta$  172.3, 137.6, 127.4, 126.2, 122.5, 119.7, 119.2, 112.3, 109.9, 57.7, 38.6, 33.0, 31.8. HRMS (APCI): calcd for  $\text{C}_{13}\text{H}_{14}\text{N}_3\text{S}$  [ $\text{M} - \text{H}$ ] $^-$ : 244.0914, Found:244.0916.

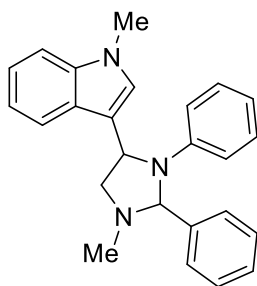

**1- methyl-3-(1-methyl-2,3-diphenylimidazolidin-4-yl)-1H-indole (13):** White solid (19.3 mg, 53% yield);  $R_f = 0.50$  (PE:EA = 10:1);  $^1\text{H}$  NMR (500 MHz,  $\text{CDCl}_3$ )  $\delta$  7.63 (d,  $J = 8.3$  Hz, 3H), 7.36 (t,  $J = 7.4$  Hz, 2H), 7.31 – 7.29 (m, 2H), 7.23 (d,  $J = 7.2$  Hz, 1H), 7.21 (s, 1H), 7.11 (t,  $J = 7.5$  Hz, 1H), 7.00 (t,  $J = 7.8$  Hz, 2H), 6.62 (t,  $J = 7.3$  Hz, 1H), 6.59 (d,  $J = 8.2$  Hz, 2H), 5.11 (d,  $J = 7.5$  Hz, 1H), 4.54 (s, 1H), 3.73 (s, 3H), 3.42 (d,  $J = 8.9$  Hz, 1H), 3.14 (t,  $J = 8.2$  Hz, 1H), 2.27 (s, 3H).  $^{13}\text{C}$  NMR (126 MHz,  $\text{CDCl}_3$ )  $\delta$  148.0, 140.9, 137.8, 128.9, 128.7, 128.6, 128.3, 127.4, 126.2, 121.8, 119.1, 118.9, 117.7, 117.1, 114.0, 109.7, 86.9, 61.6, 58.2, 39.5, 33.0. HRMS (ESI): calcd for  $\text{C}_{25}\text{H}_{25}\text{N}_3\text{Na}$   $[\text{M} + \text{Na}]^+$ : 390.1941, Found:390.1945.

## 5. Reference

[1] Wu, K.; Du, Y.; Wei, Z.; Wang, T., *Chem. Commun.*, 2018, **54**, 7443-7446.

## 6. NMR spectra of products

### *N*-(2,4-dinitrophenoxy)-2-(1-(2-fluorobenzyl)-1*H*-indol-3-yl)-*N*-methylacetamide (1e)

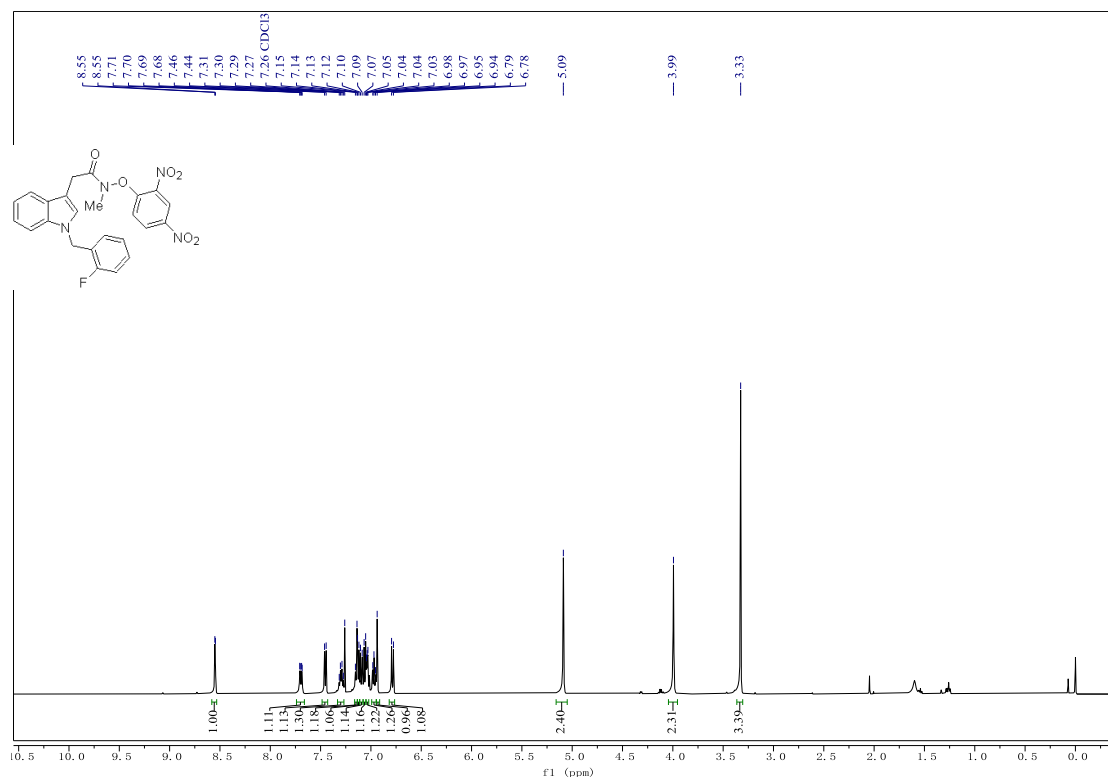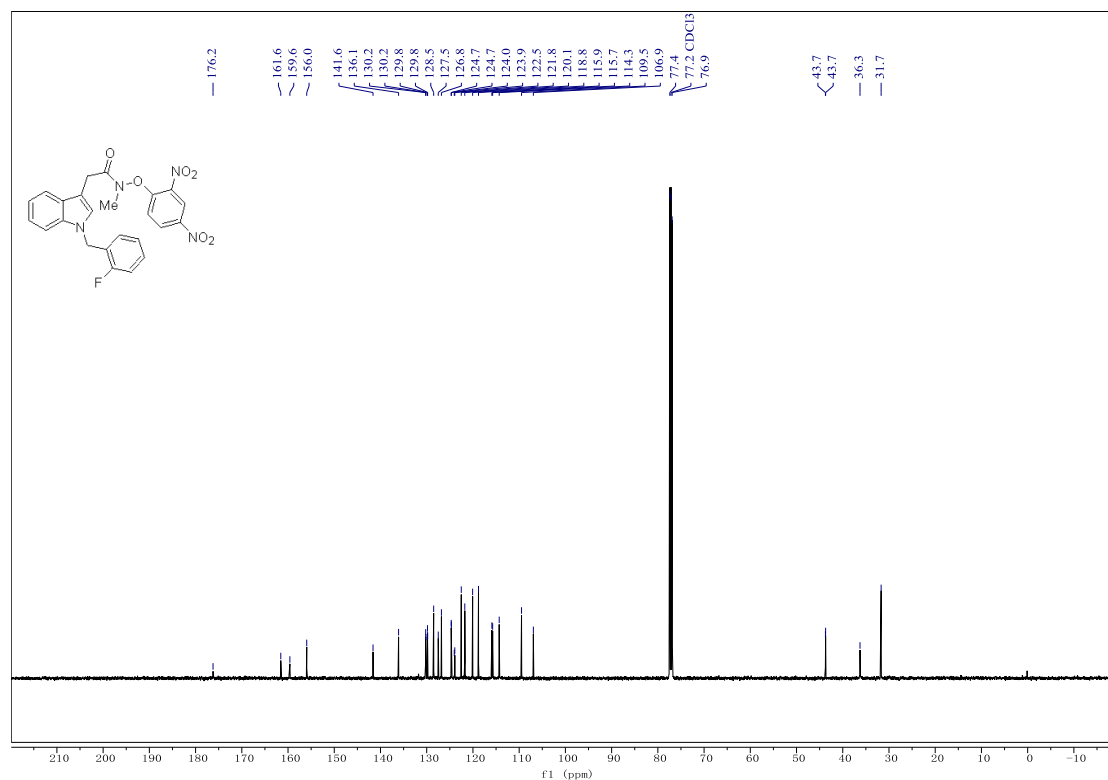

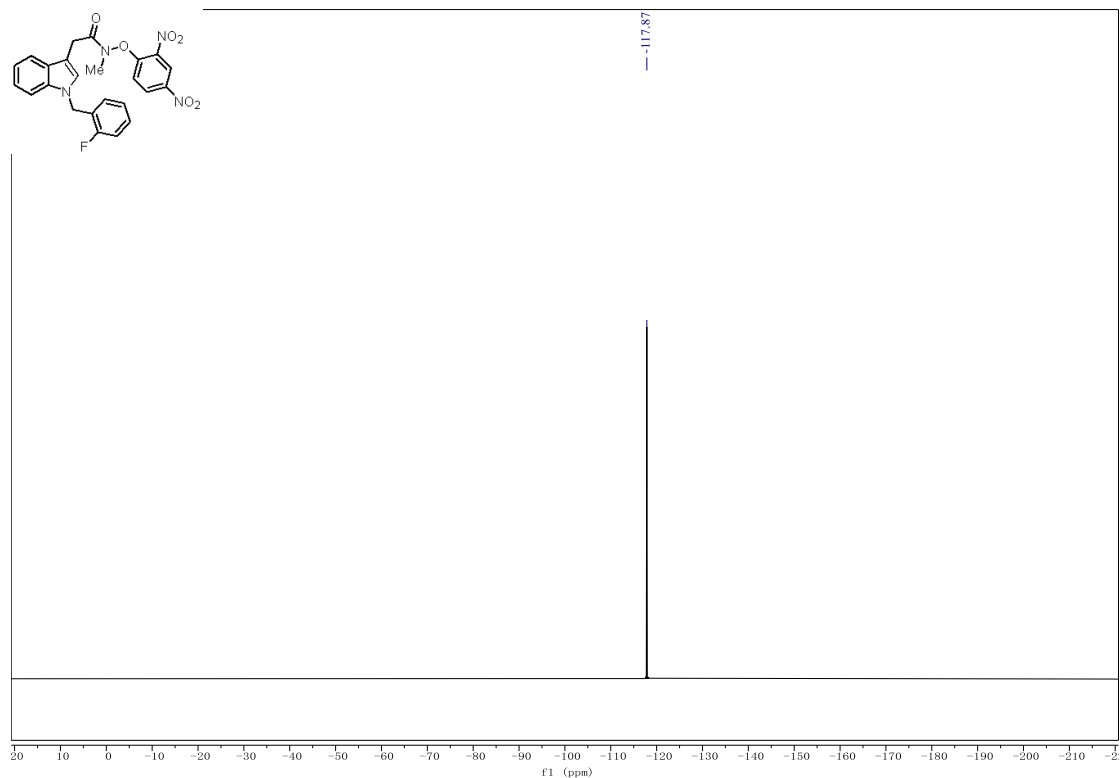

**2-(1-(4-chlorobenzoyl)-5-methoxy-2-methyl-1H-indol-3-yl)-N-(2,4-dinitrophenoxy)-N-methylacetamide (1f)**

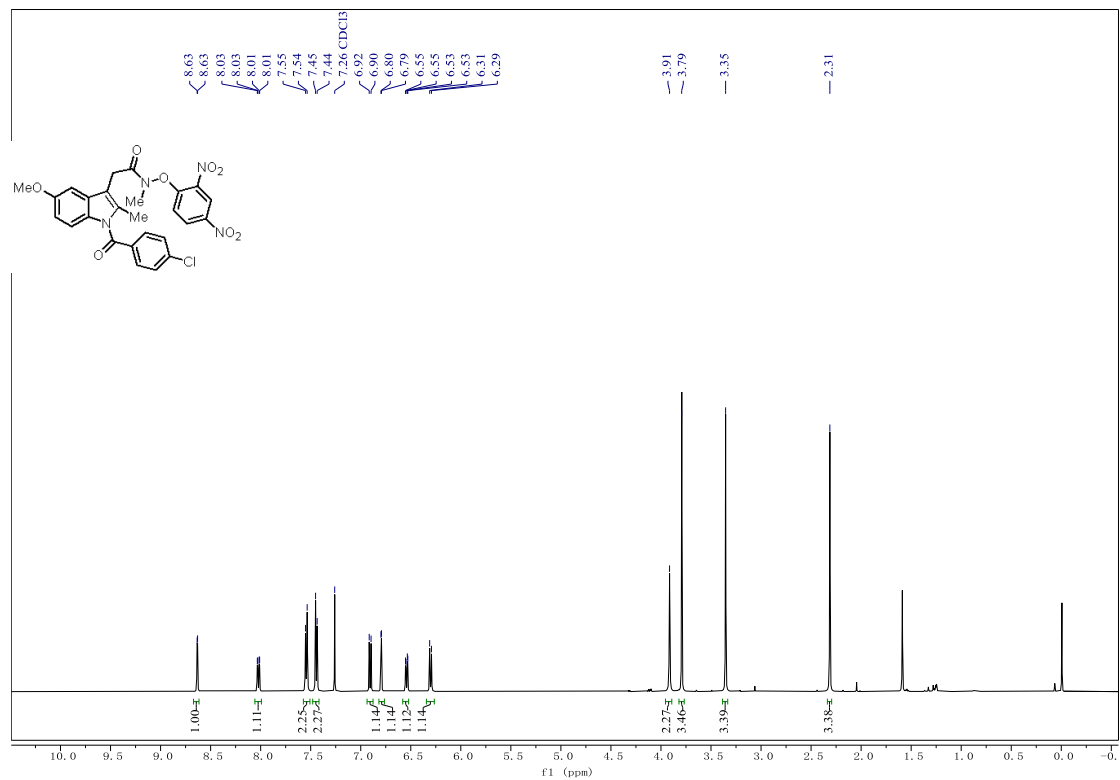

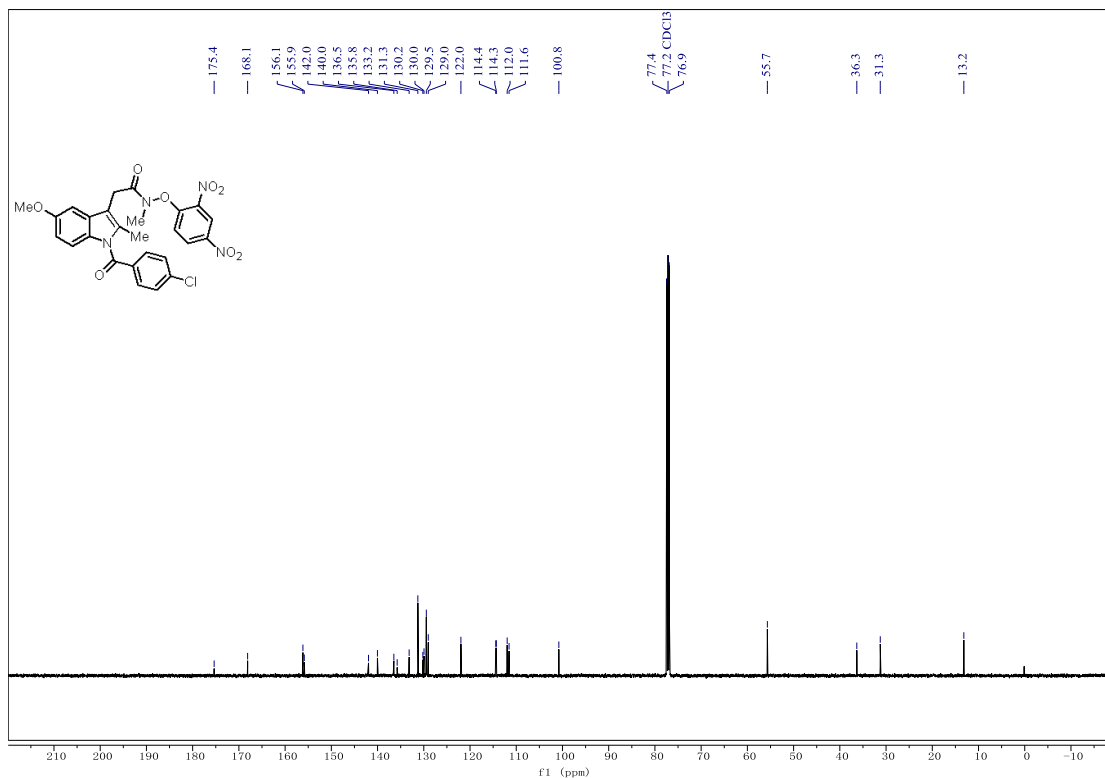

*N*-(*tert*-butyl)-*N*-(2,4-dinitrophenoxy)-2-(1-methyl-1*H*-indol-3-yl)acetamide (1g)

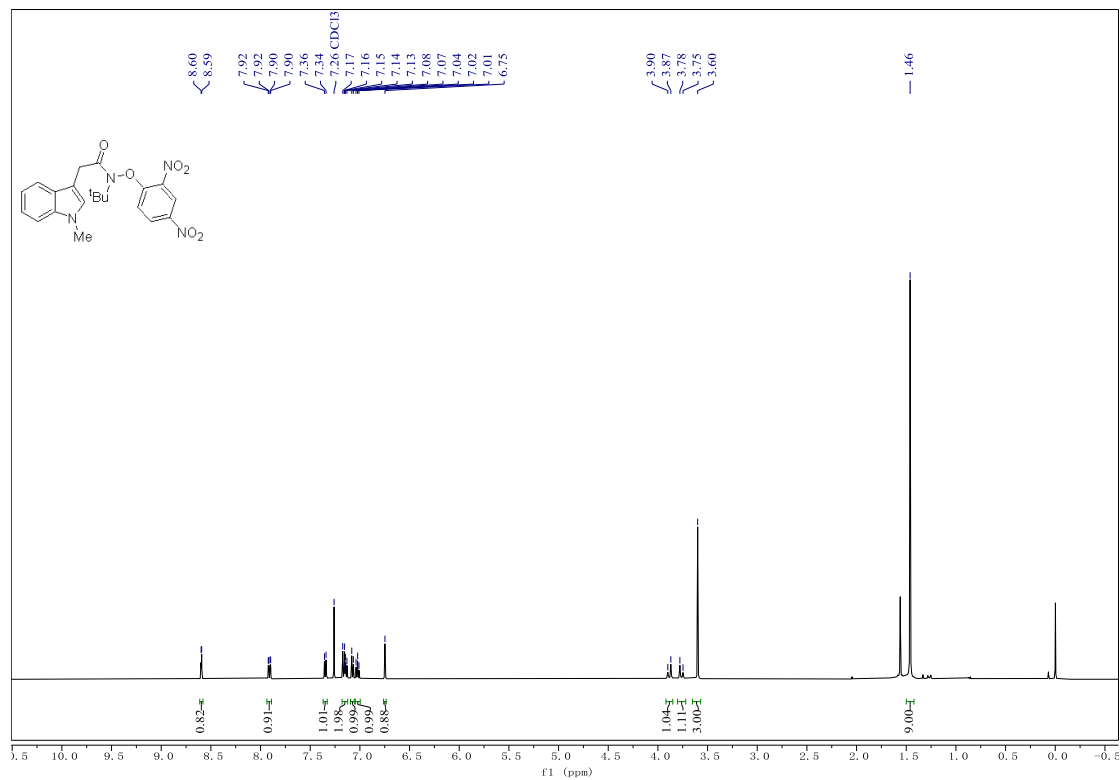



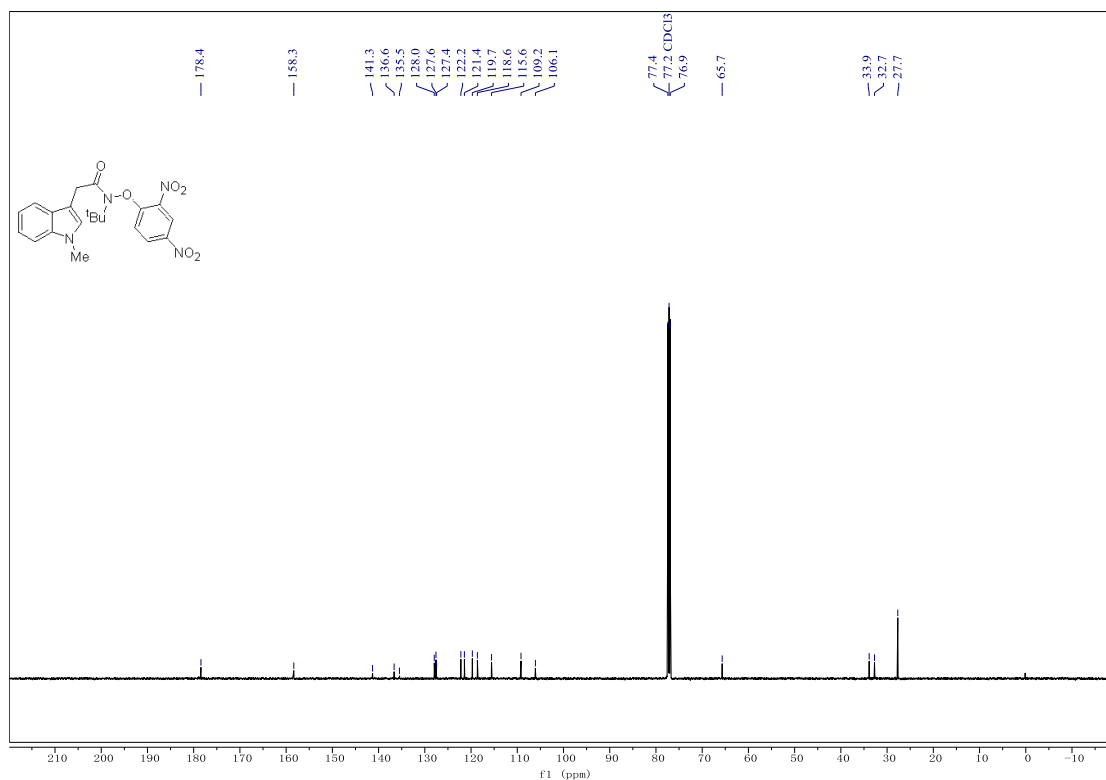

***N*-(2,4-dinitrophenoxy)-*N*-methyl-2-phenylacetamide (1i)**

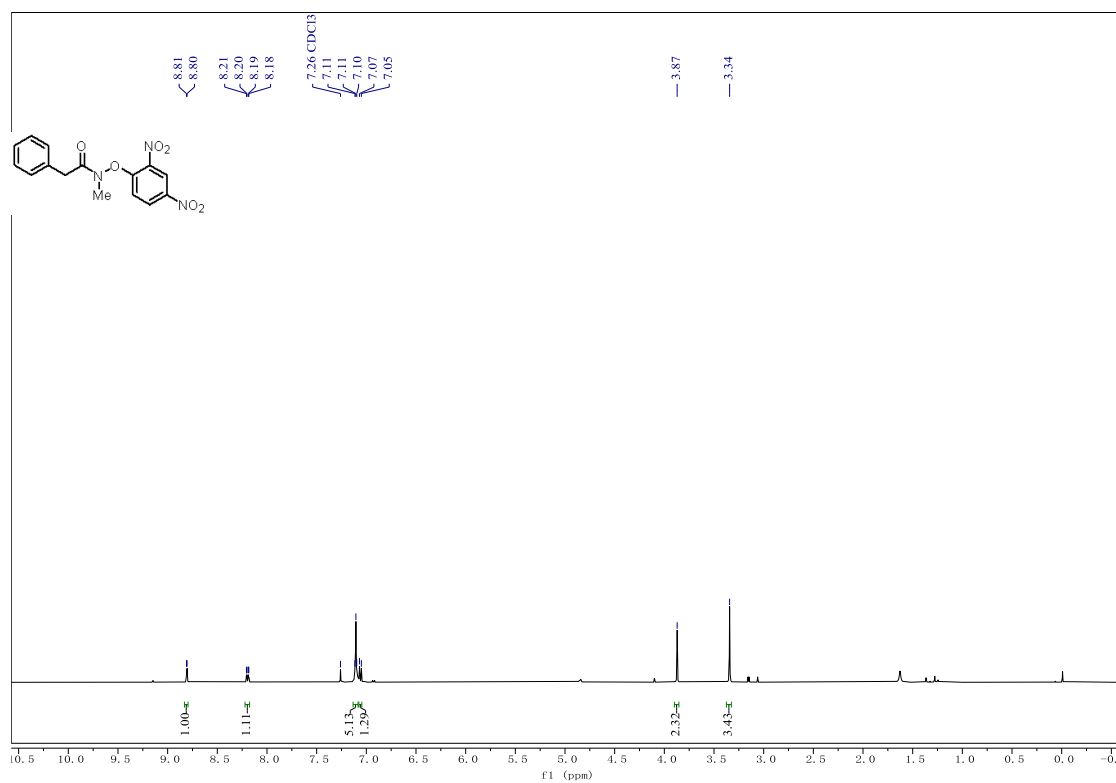

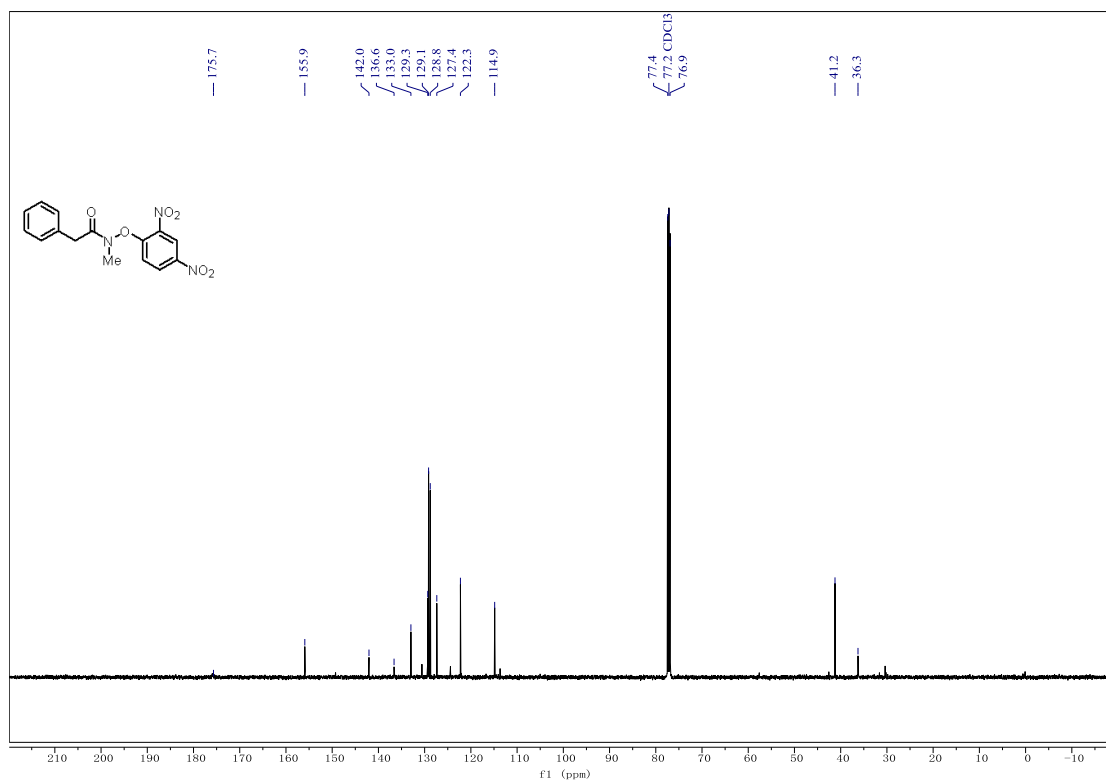

***N*-(2,4-dinitrophenoxy)-2-(4-methoxyphenyl)-*N*-methylacetamide (1j)**

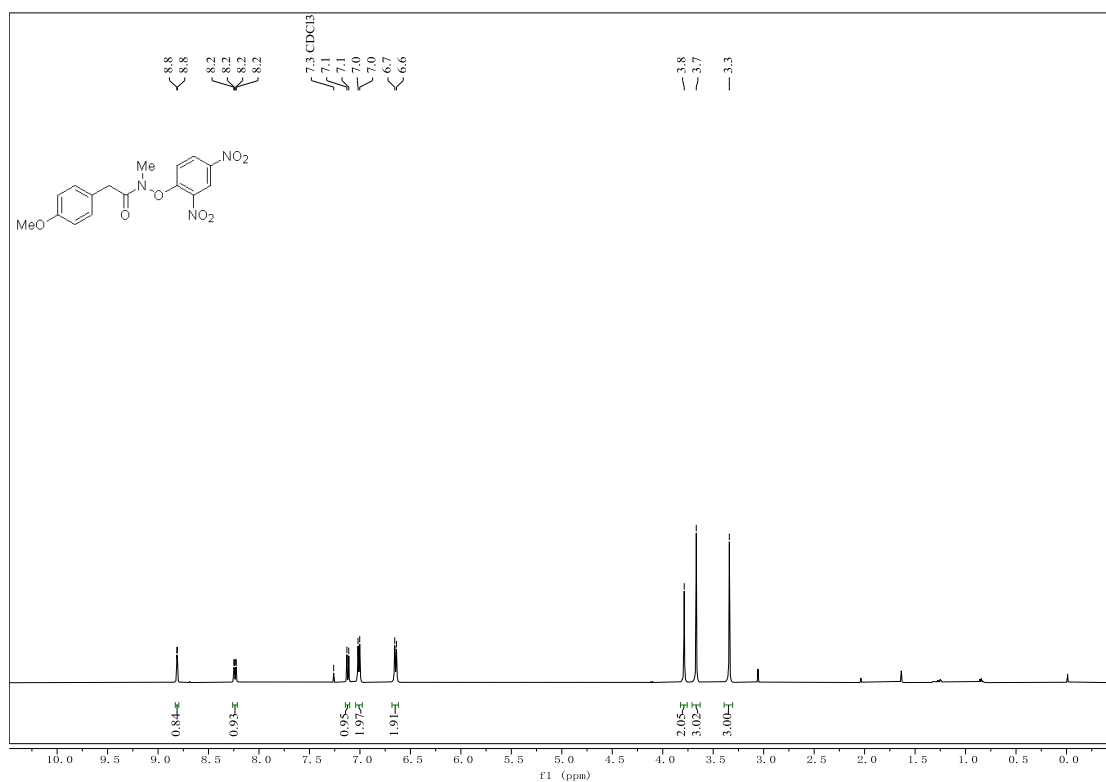

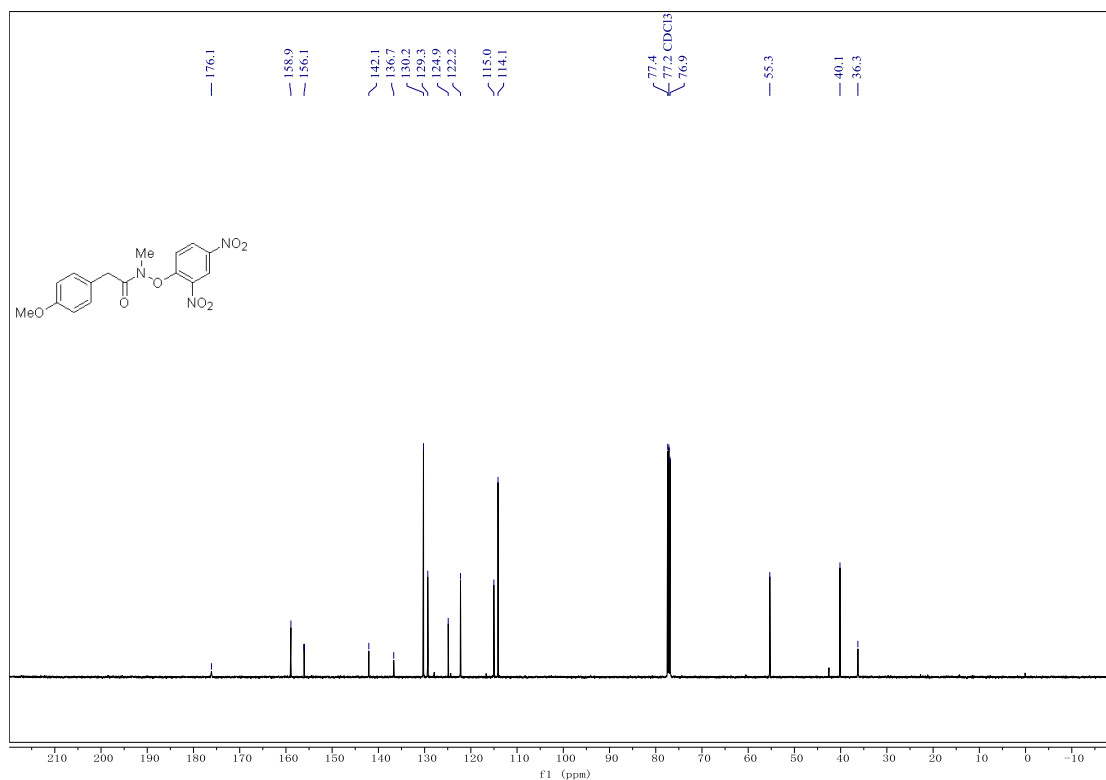

**2-([1,1'-biphenyl]-4-yl)-N-(2,4-dinitrophenoxy)-N-methylacetamide (1k)**

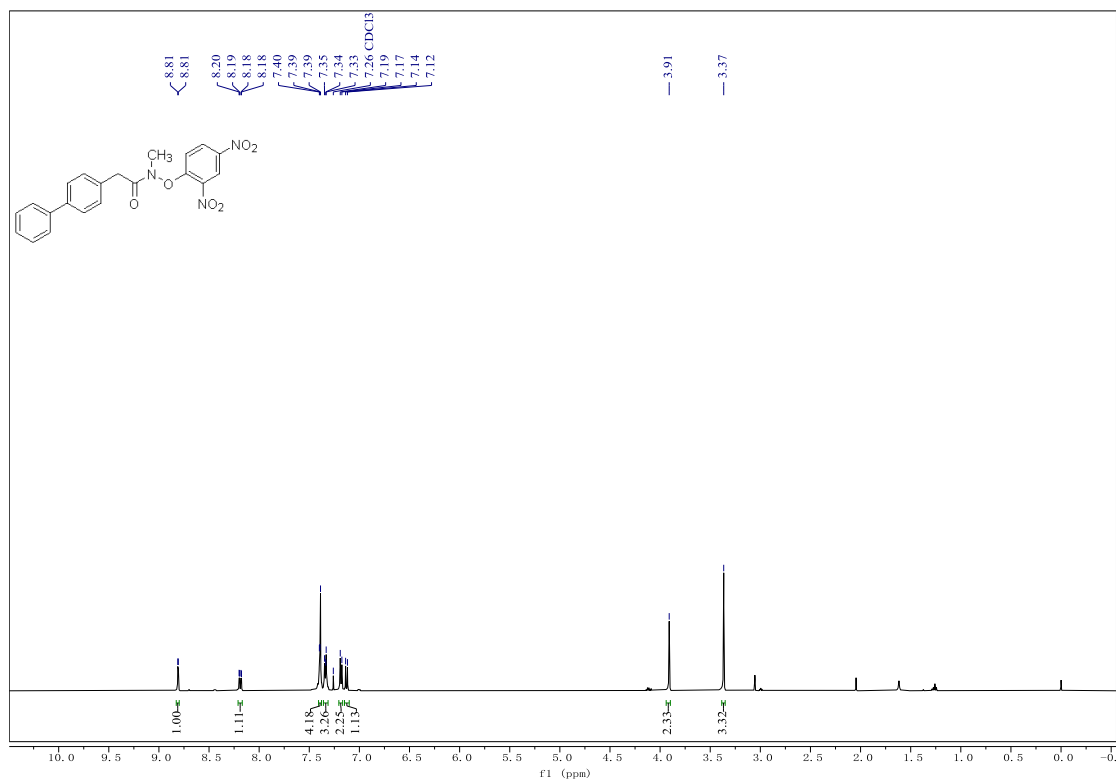

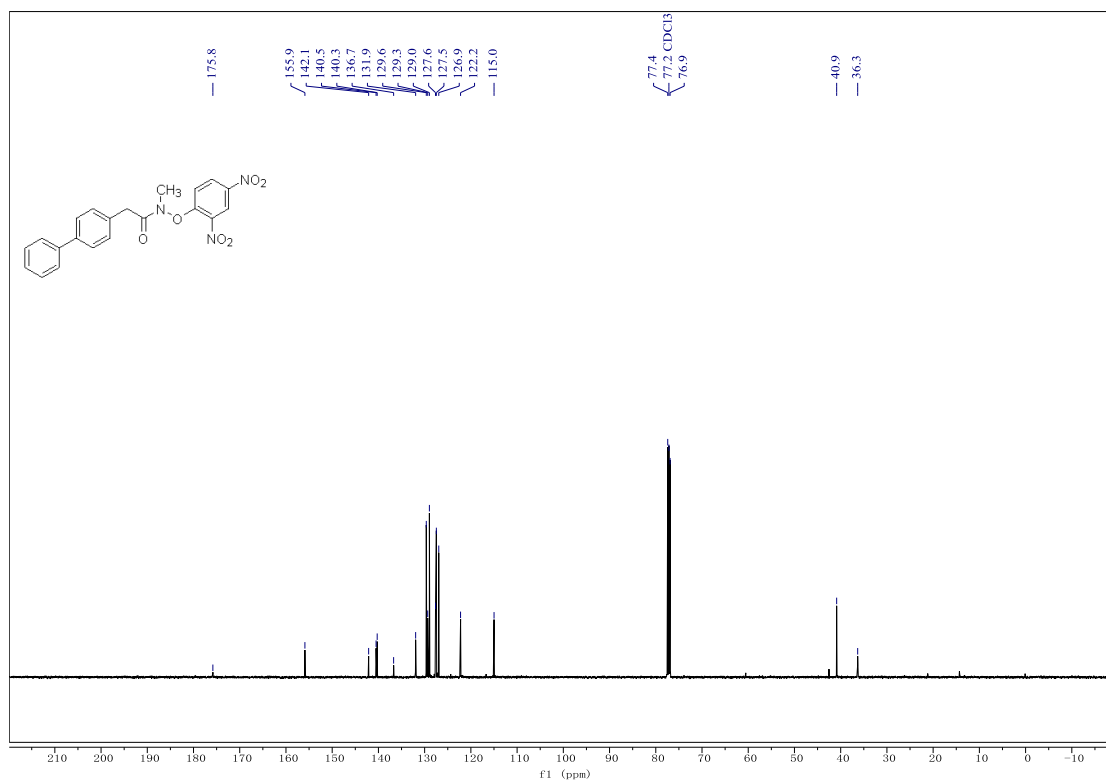

***N*-methyl-2-(1-methyl-1H-indol-3-yl)-2-(phenylamino)acetamide (3a)**

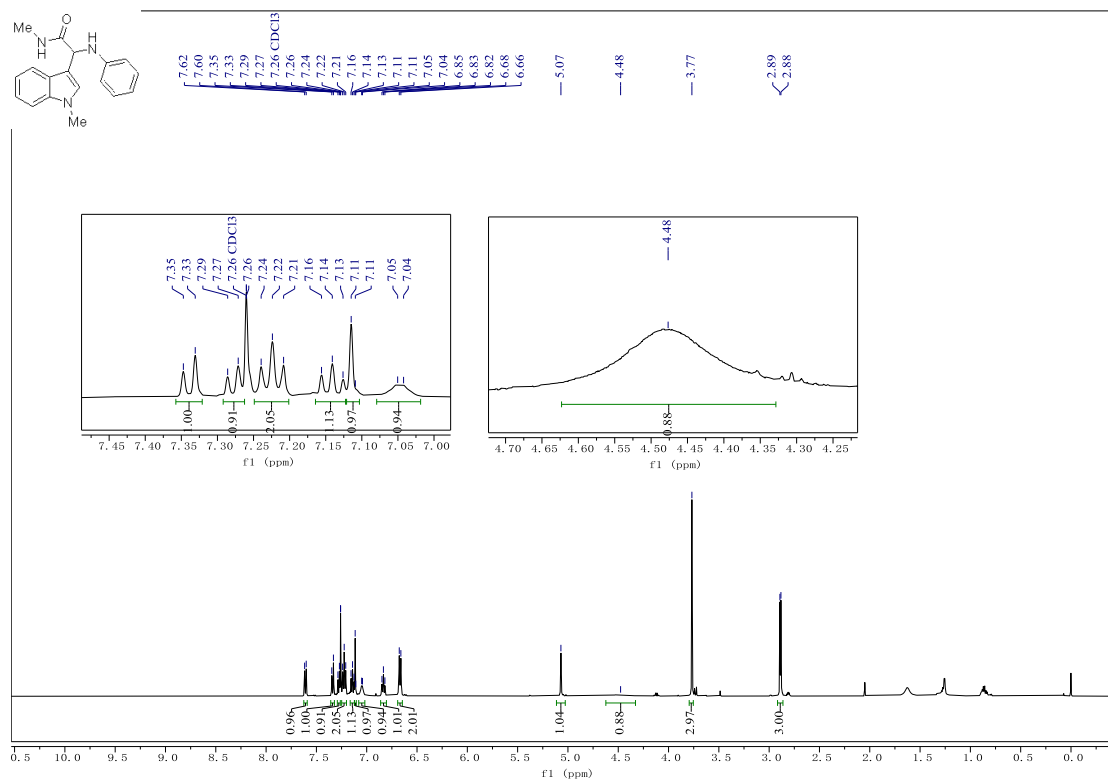

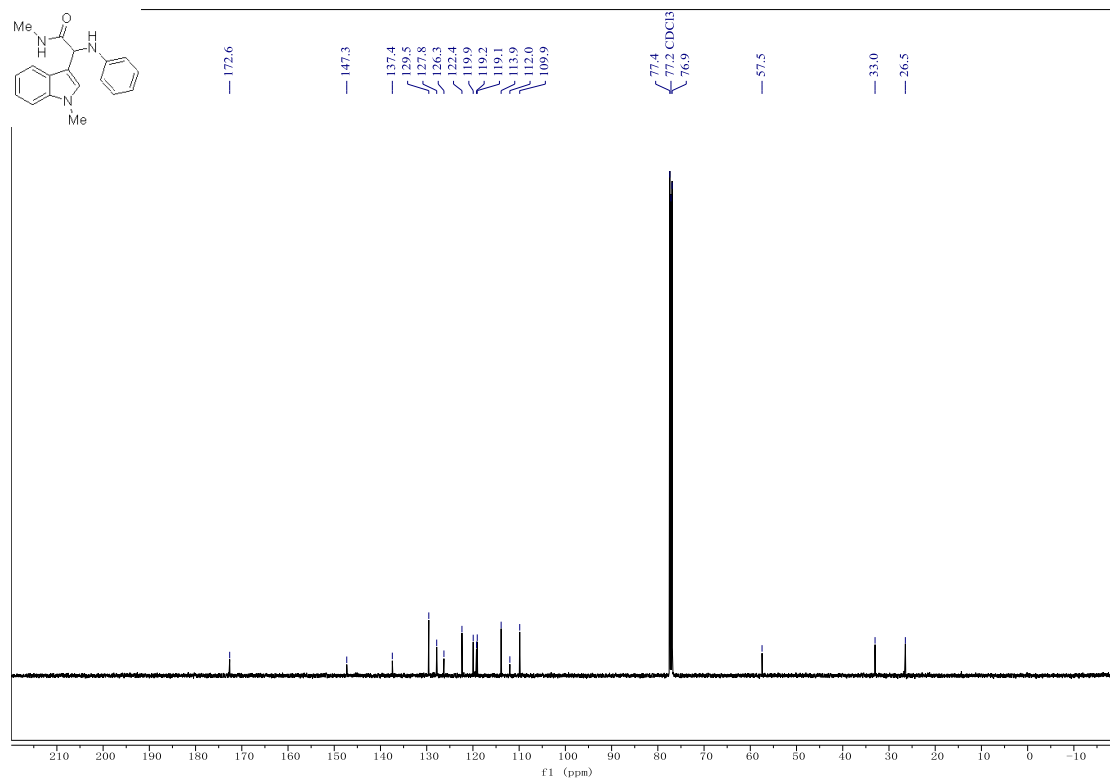

**N-methyl-2-(1-methyl-1H-indol-3-yl)-2-(p-tolylamino) acetamide (3b)**

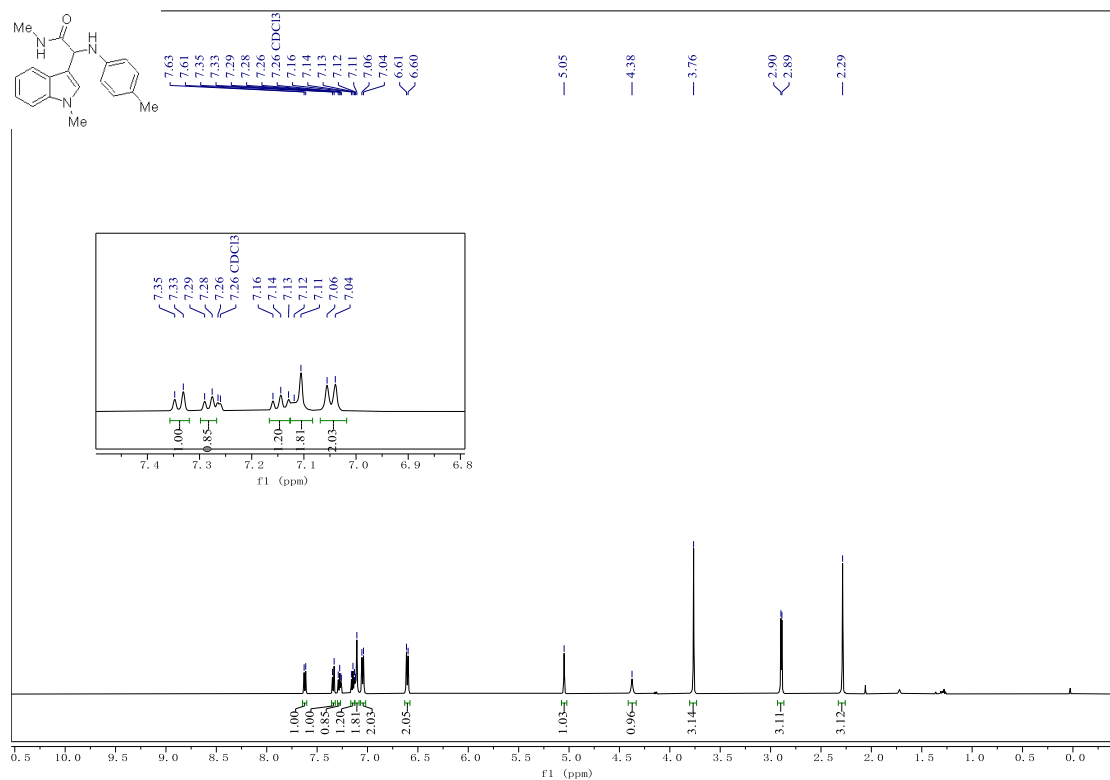

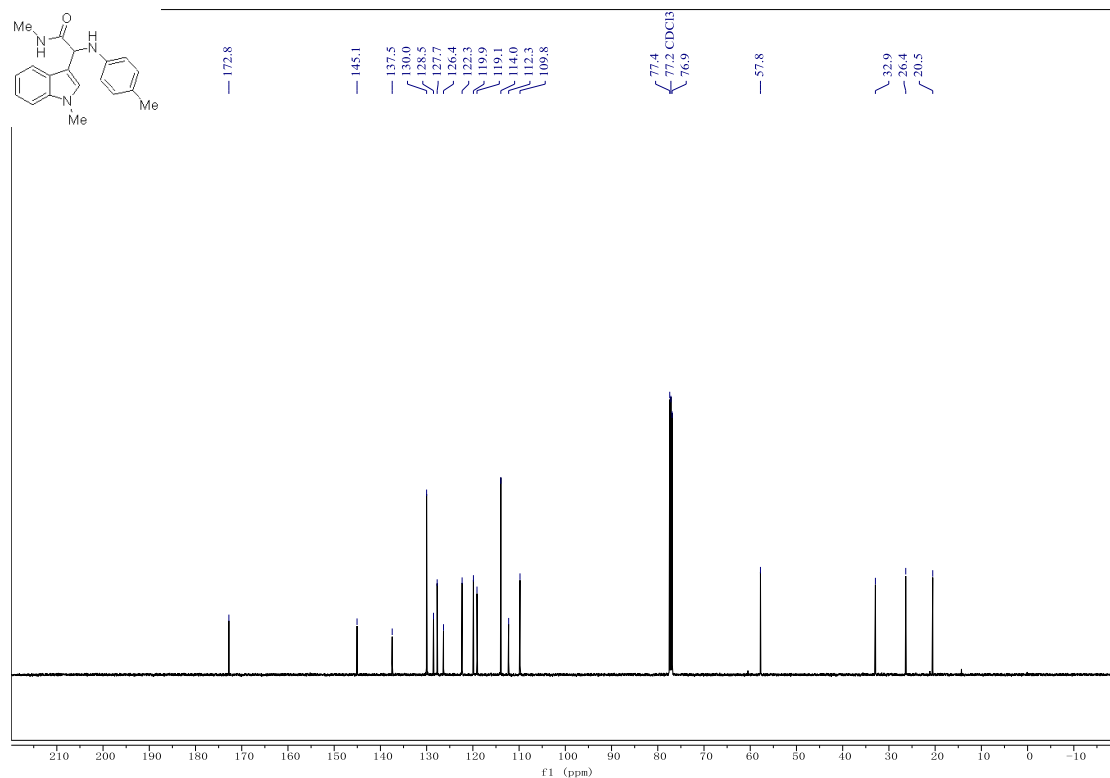

**2-((4-*tert*-butyl)phenyl)amino)-*N*-methyl-2-(1-methyl-1*H*-indol-3-yl)acetamide (3c)**

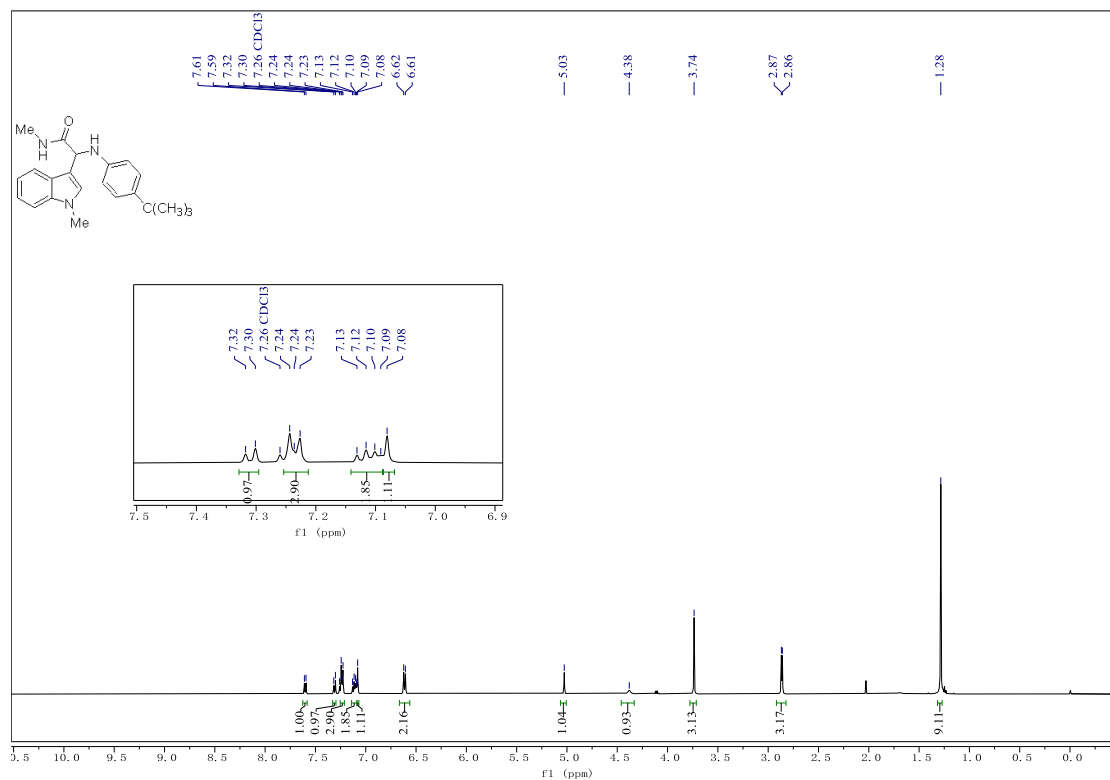

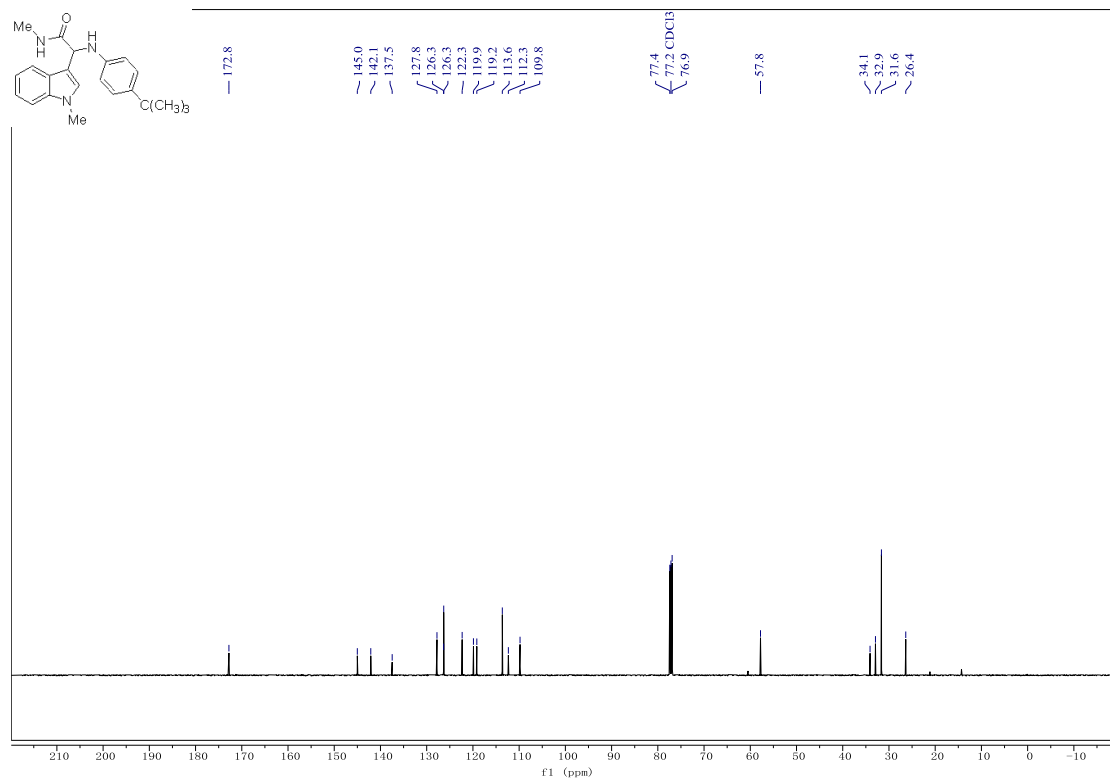

**2-((4-isopropylphenyl)amino)-*N*-methyl-2-(1-methyl-1*H*-indol-3-yl)acetamide (3d)**

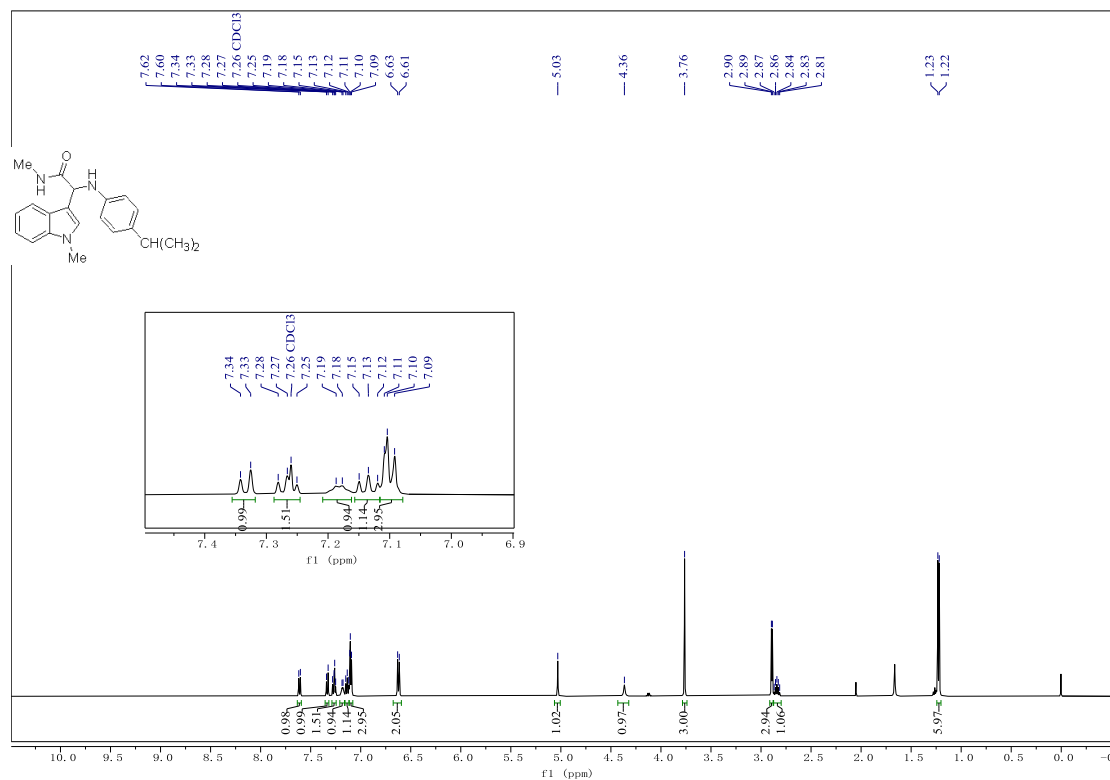

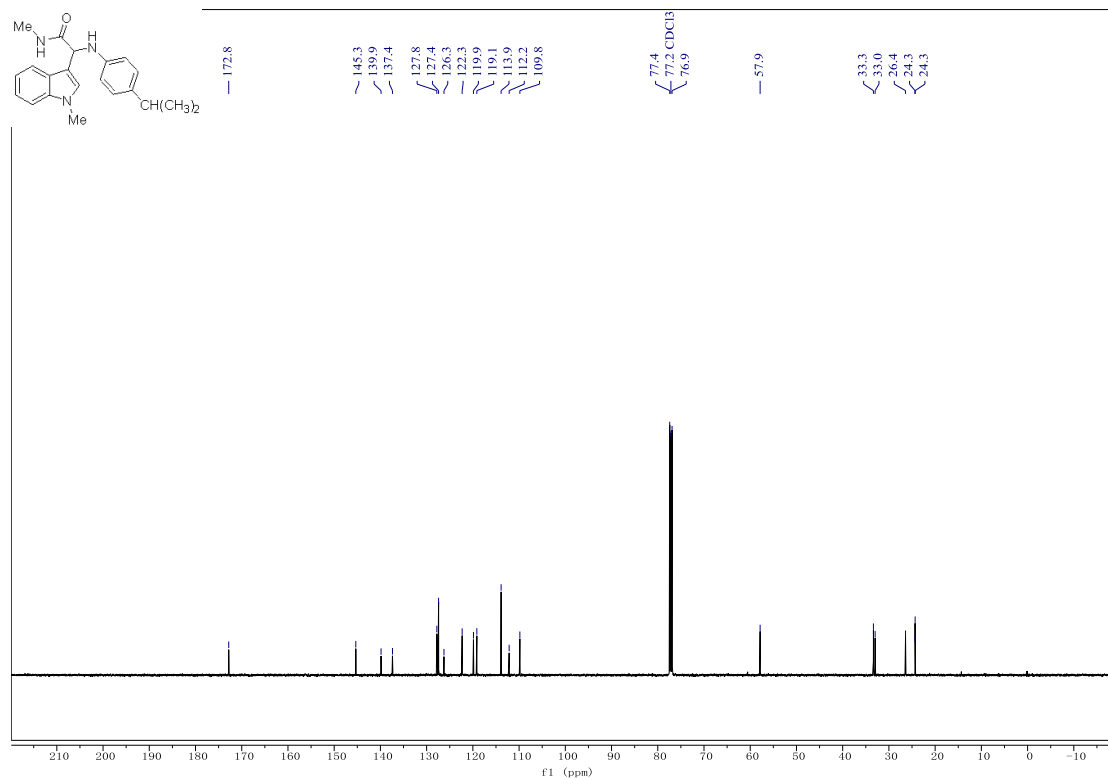

**2-((4-methoxyphenyl)amino)-N-methyl-2-(1-methyl-1H-indol-3-yl)acetamide(3e)**

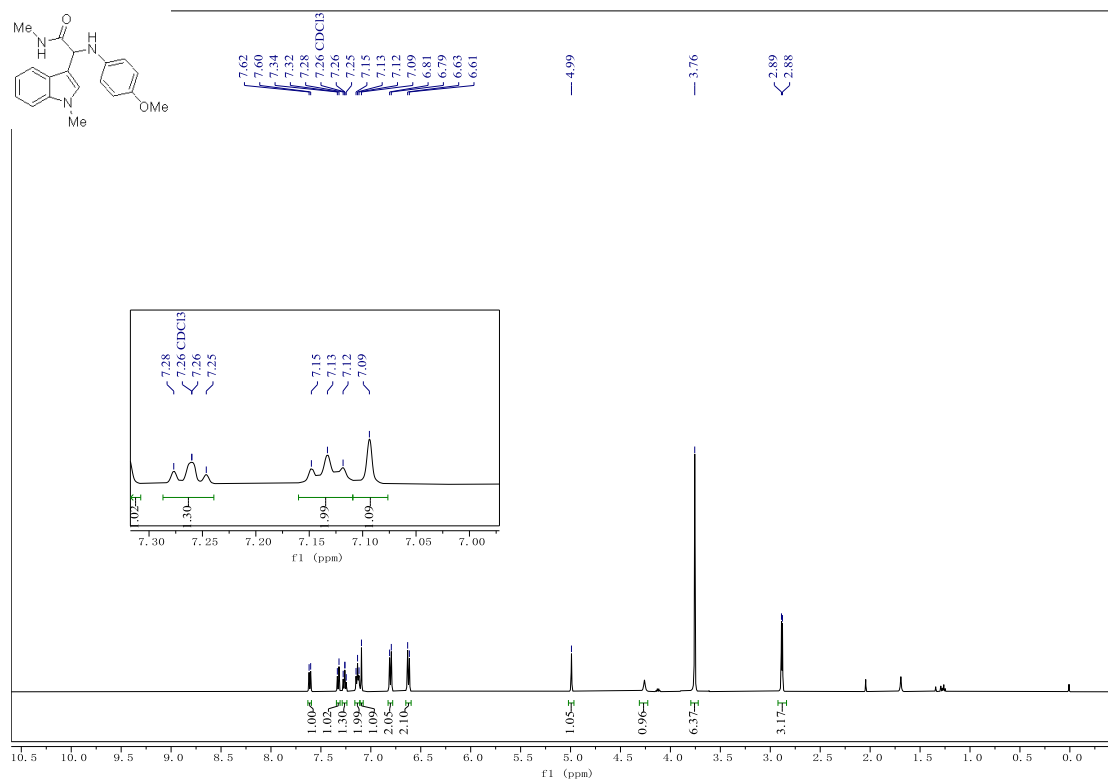



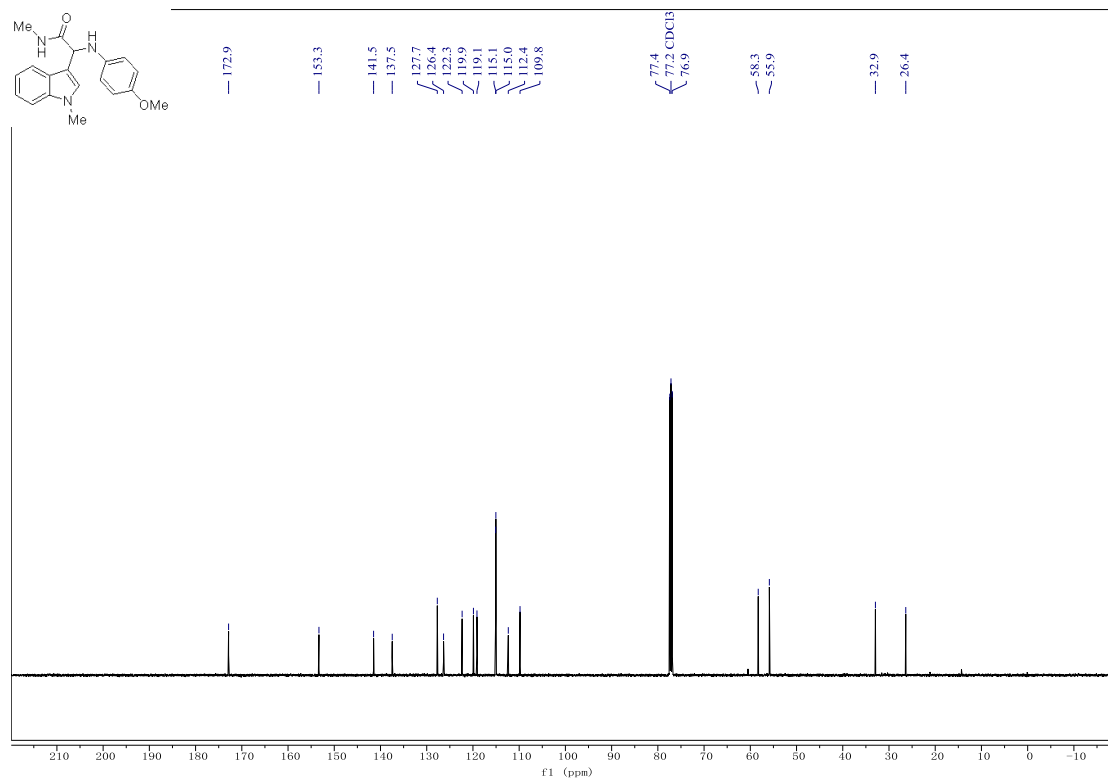

**2-((4-fluorophenyl)amino)-N-methyl-2-(1-methyl-1H-indol-3-yl)acetamide (3f)**

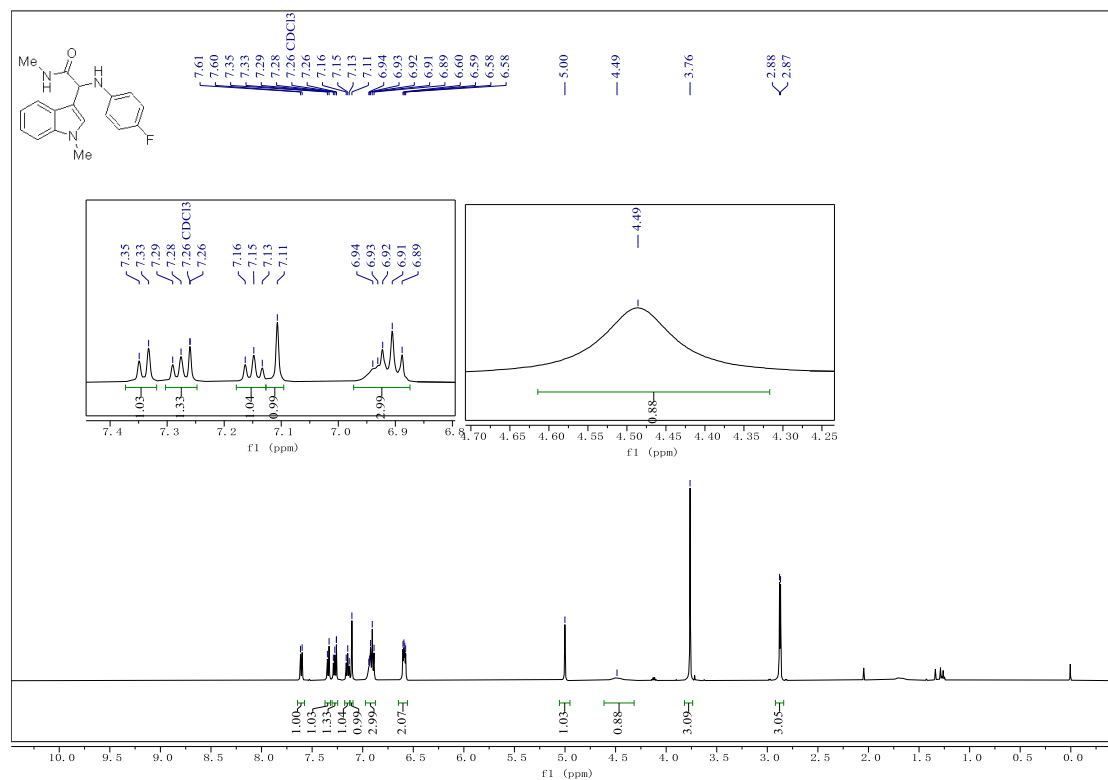

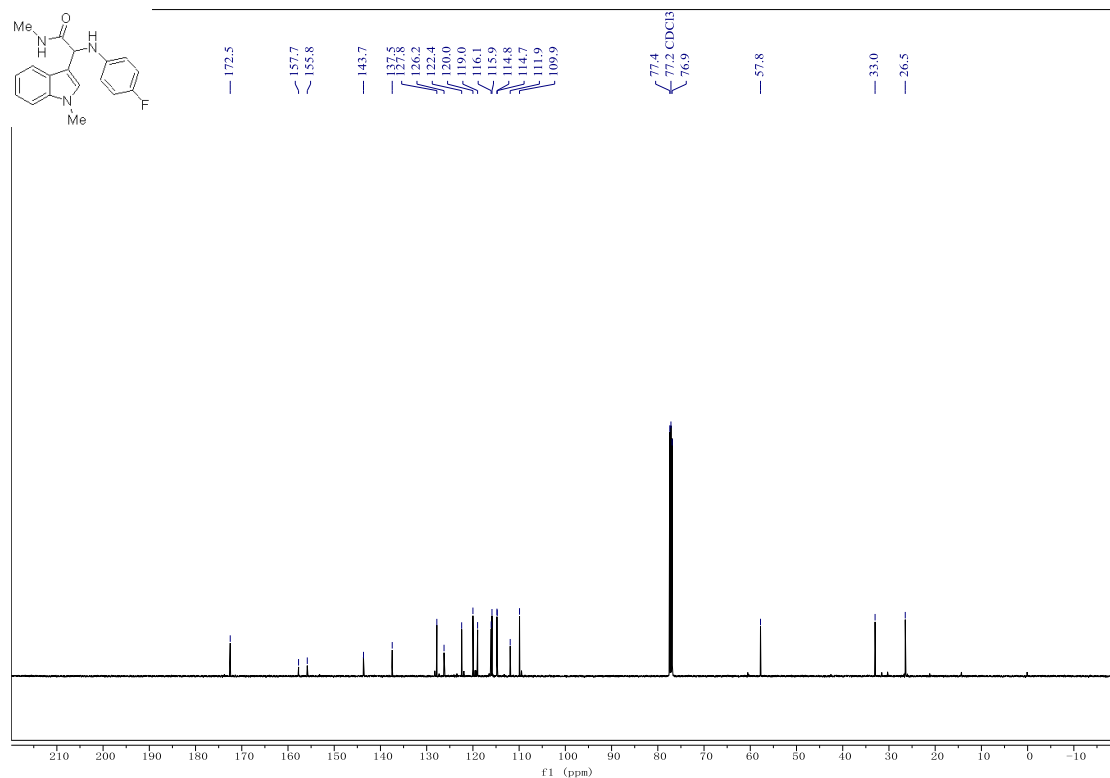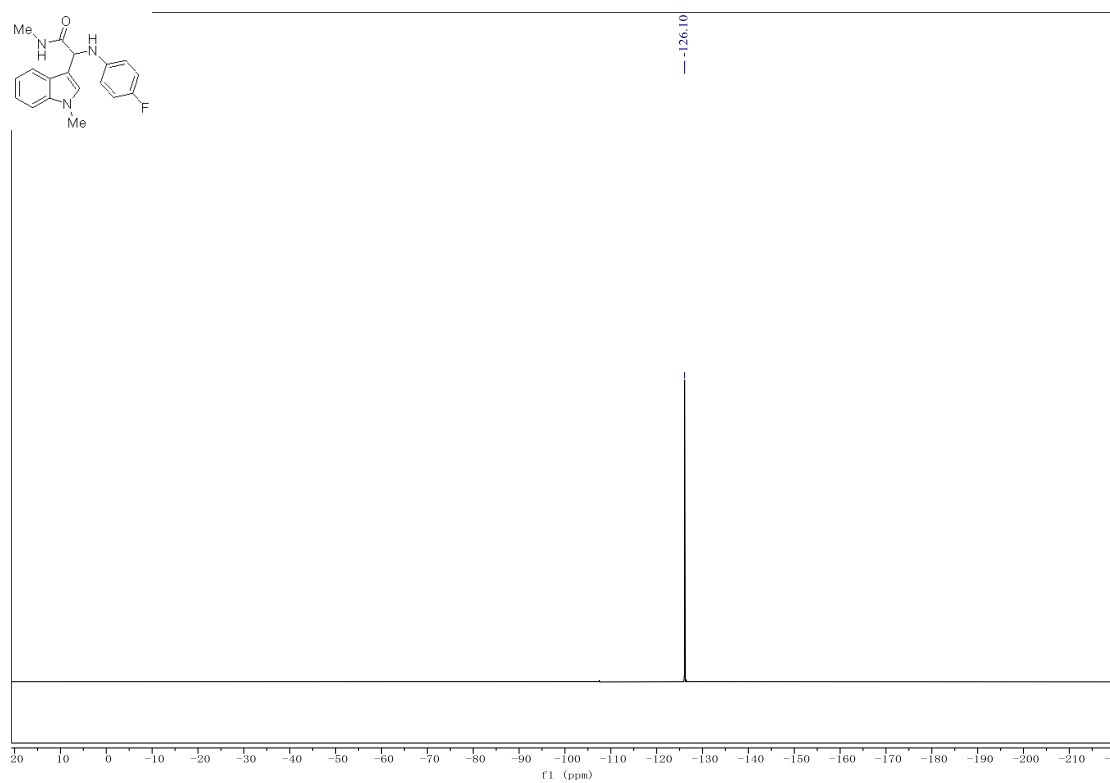

**2-((4-chlorophenyl)amino)-*N*-methyl-2-(1-methyl-1*H*-indol-3-yl)acetamide (3g)**

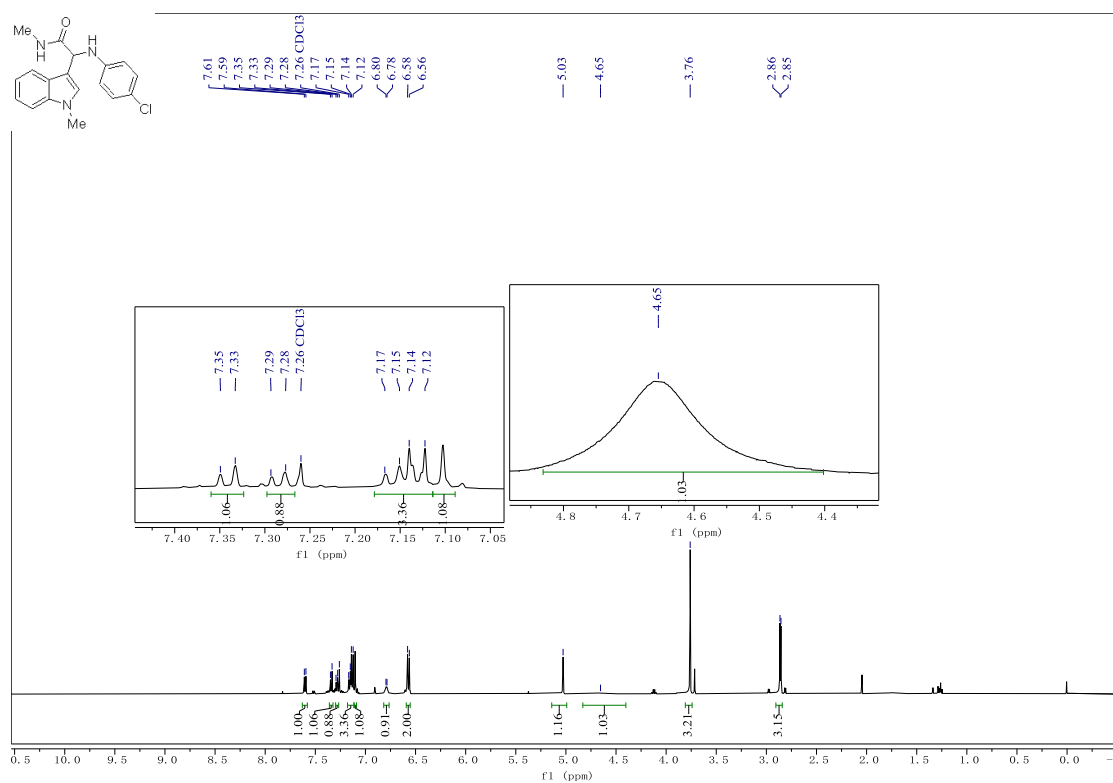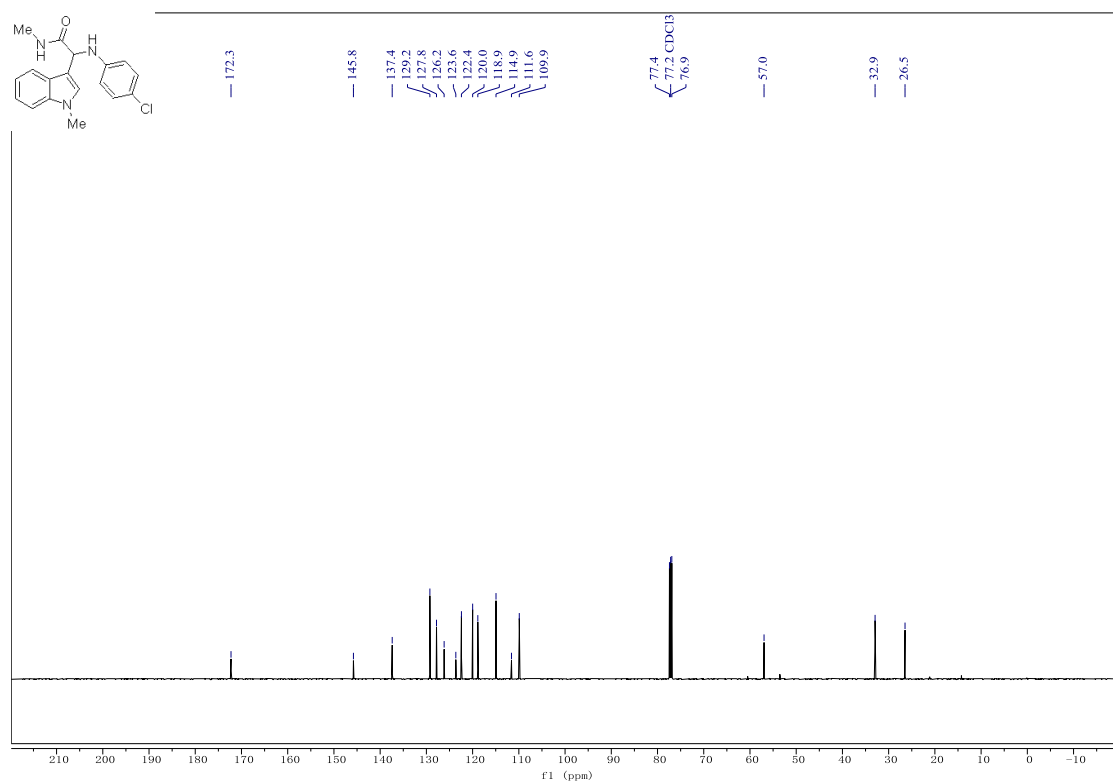

**2-((4-bromophenyl)amino)-*N*-methyl-2-(1-methyl-1*H*-indol-3-yl)acetamide (3h)**

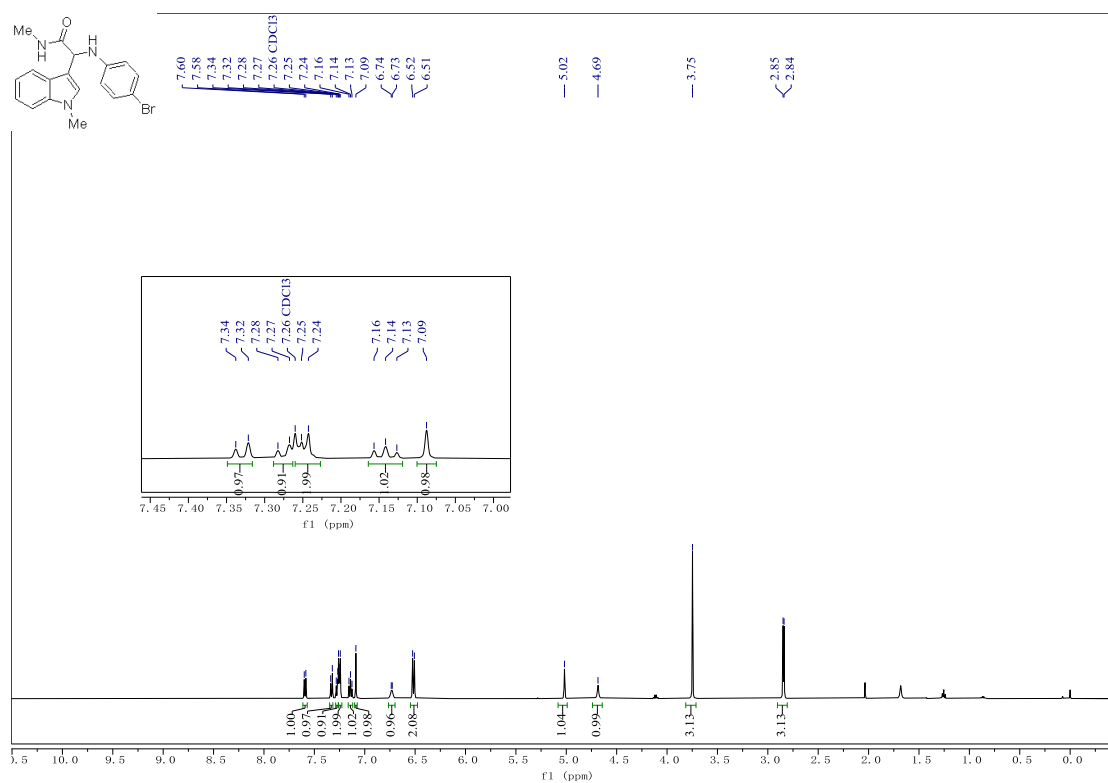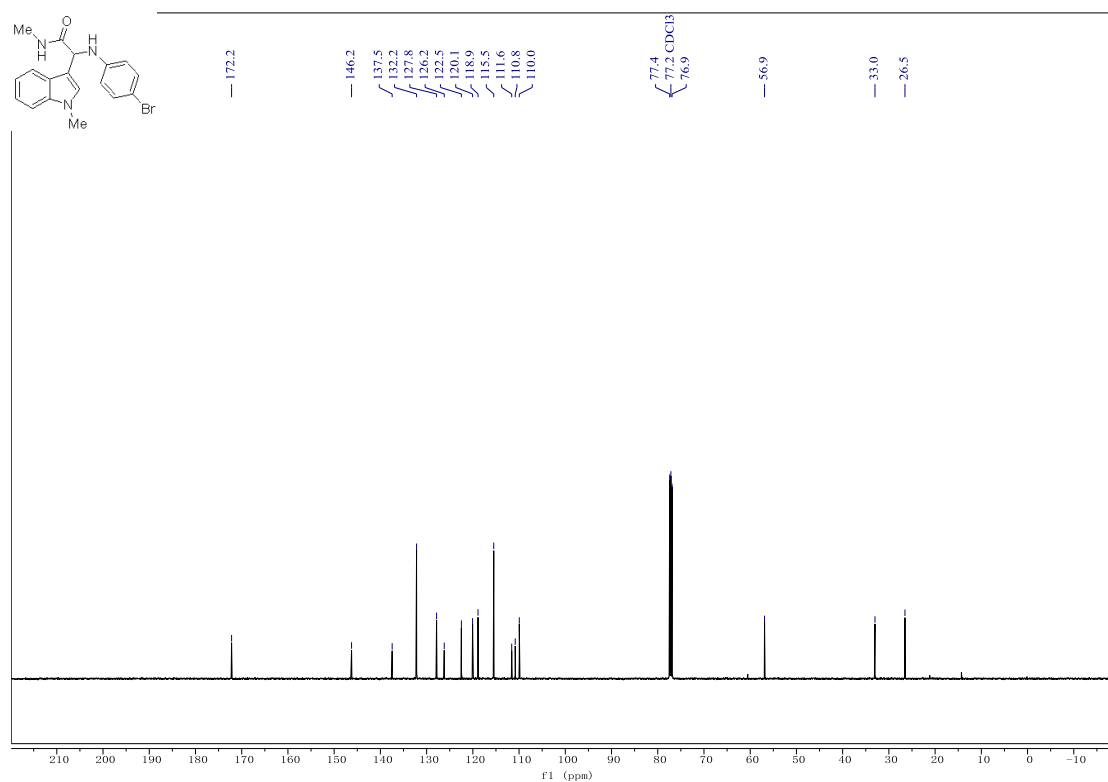

**2-((4-iodophenyl)amino)-*N*-methyl-2-(1-methyl-1*H*-indol-3-yl)acetamide (3i)**

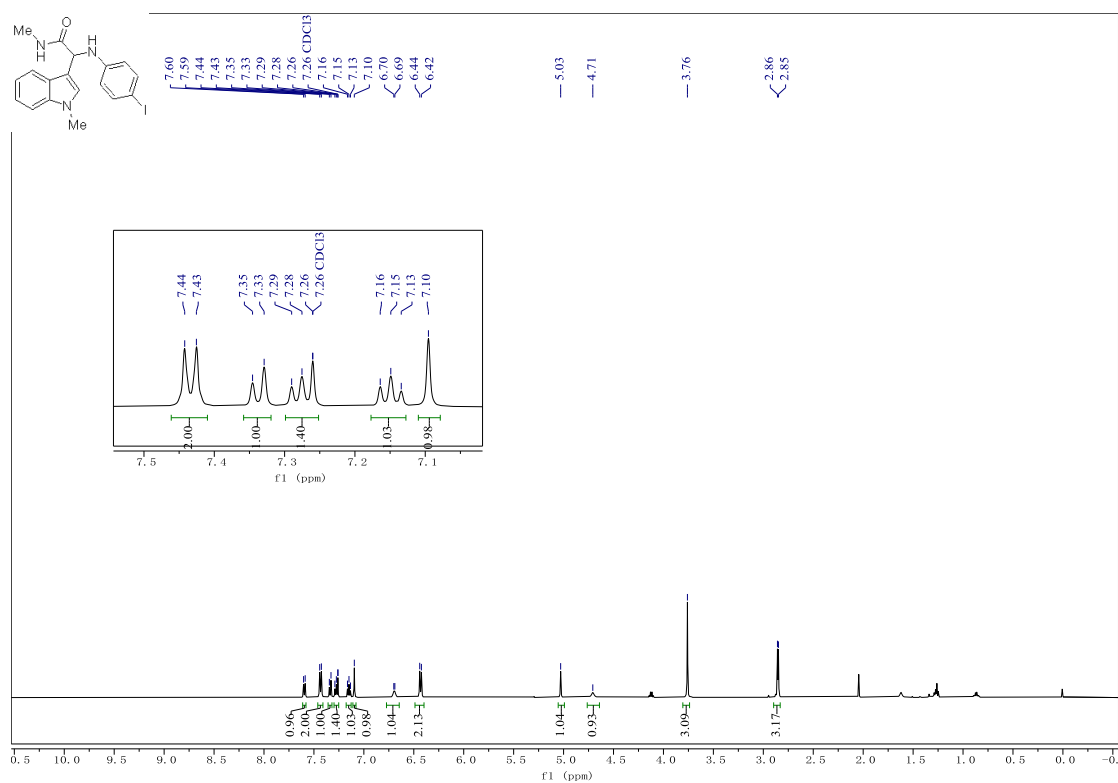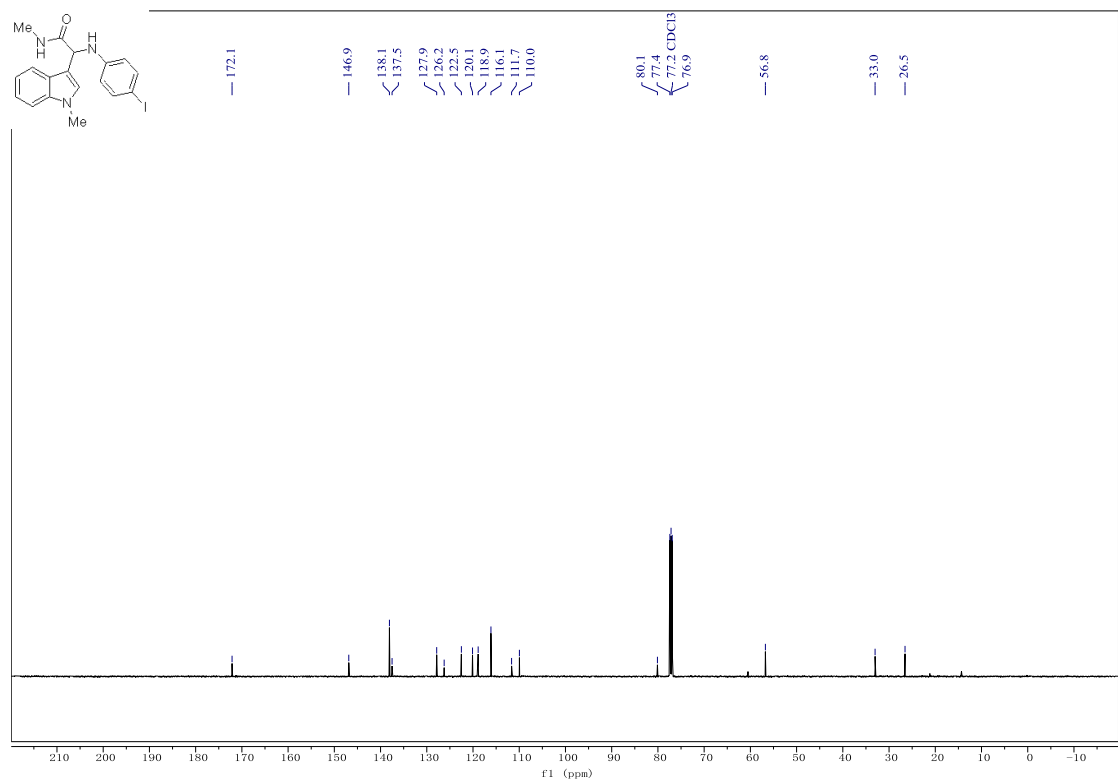

**2-((4-cyanophenyl)amino)-*N*-methyl-2-(1-methyl-1*H*-indol-3-yl)acetamide (3j)**

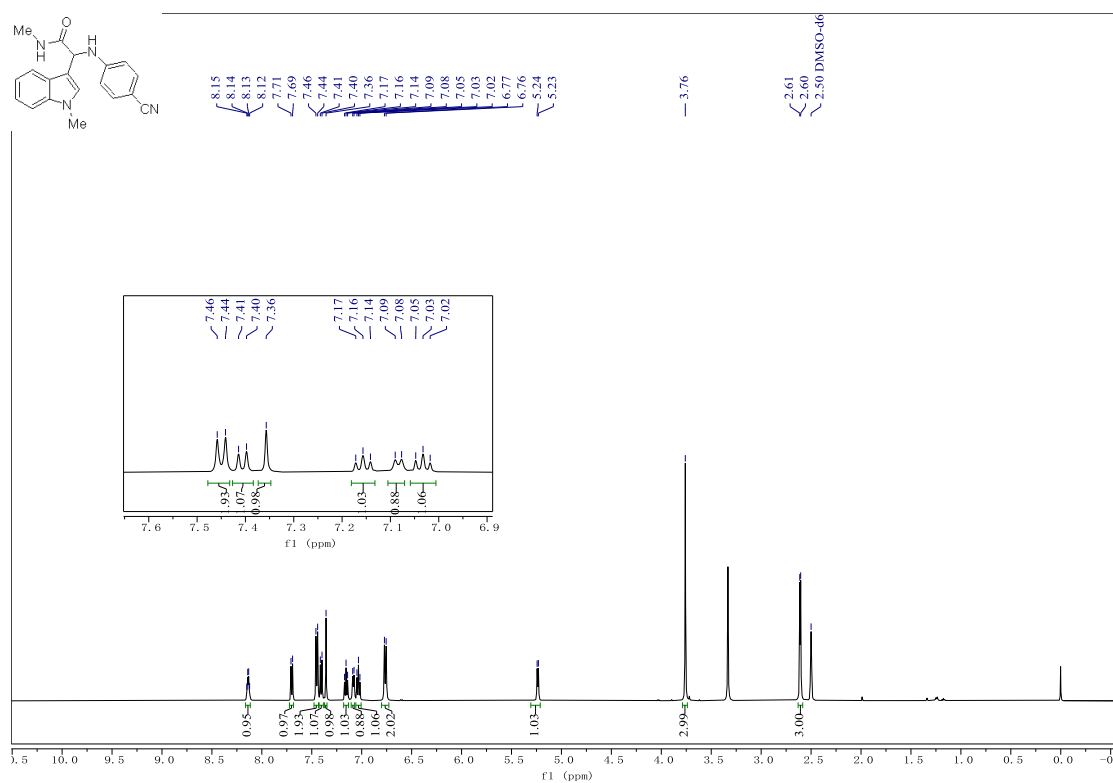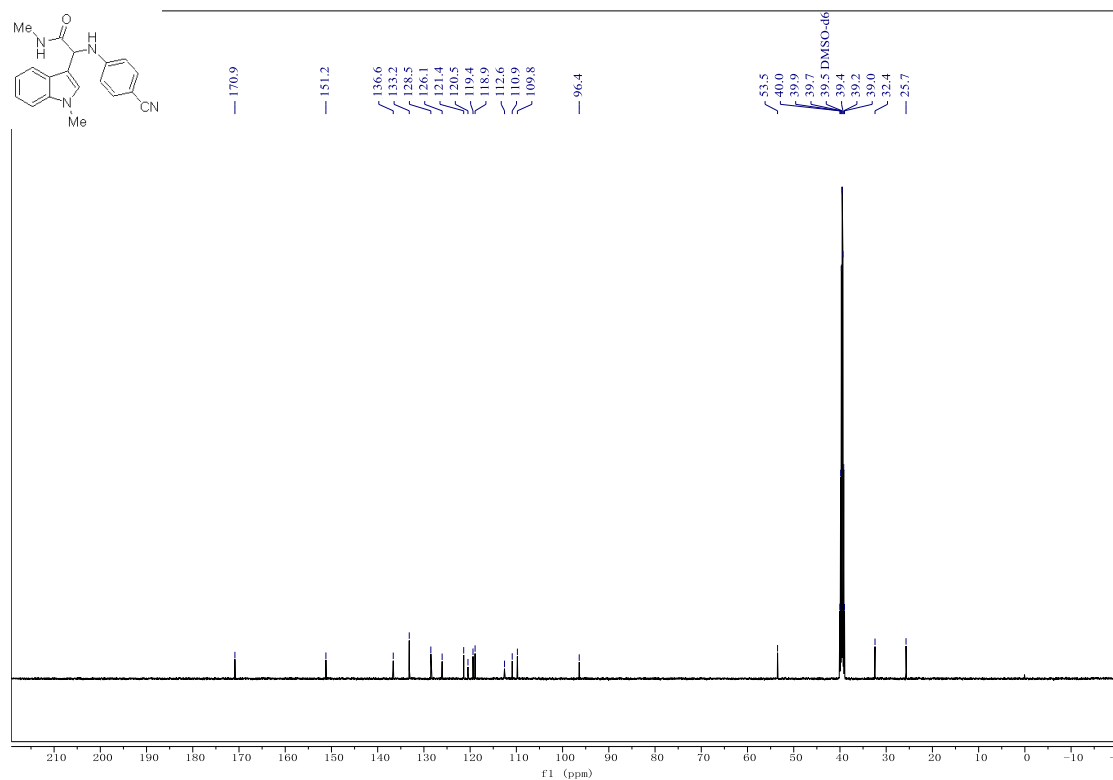

***N*-methyl-2-(1-methyl-1*H*-indol-3-yl)-2-((4-(trifluoromethyl)phenyl)amino)acetamide (3k)**

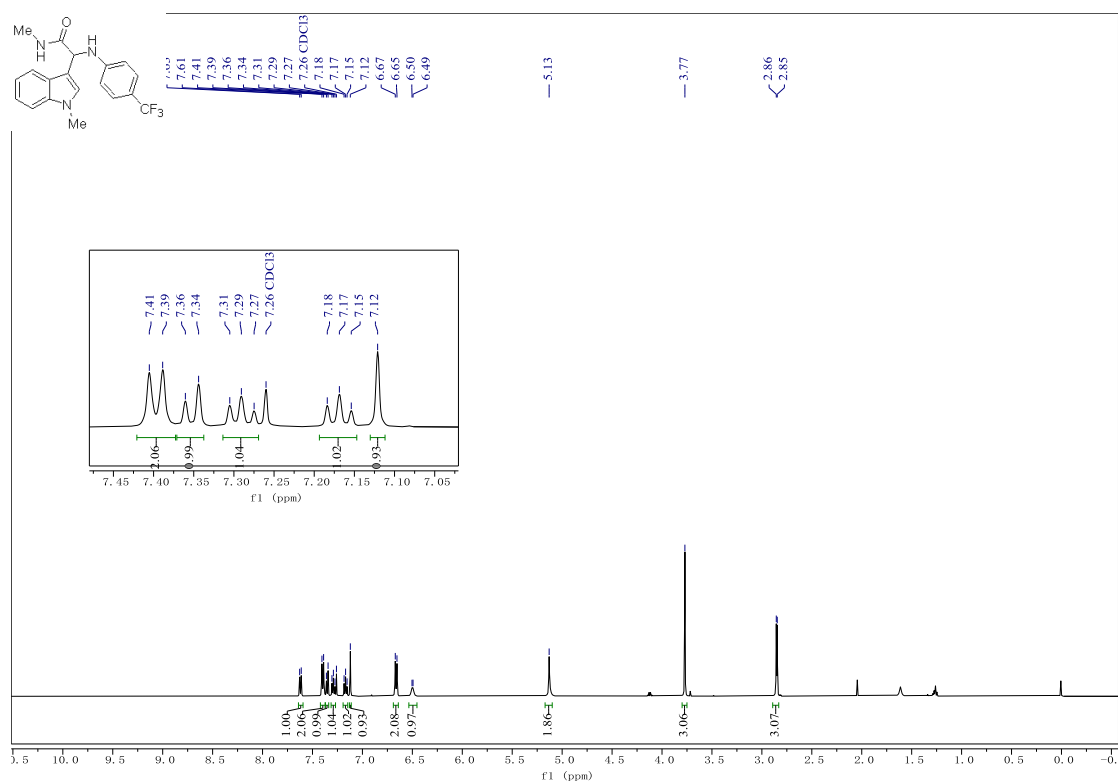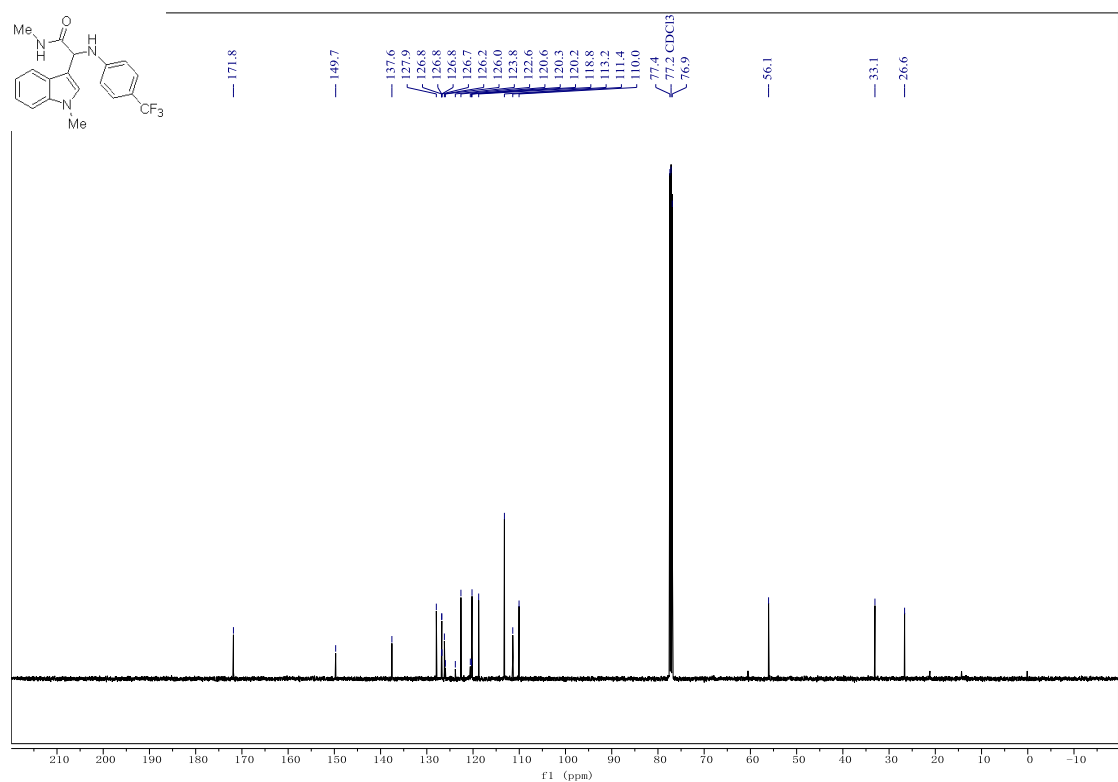

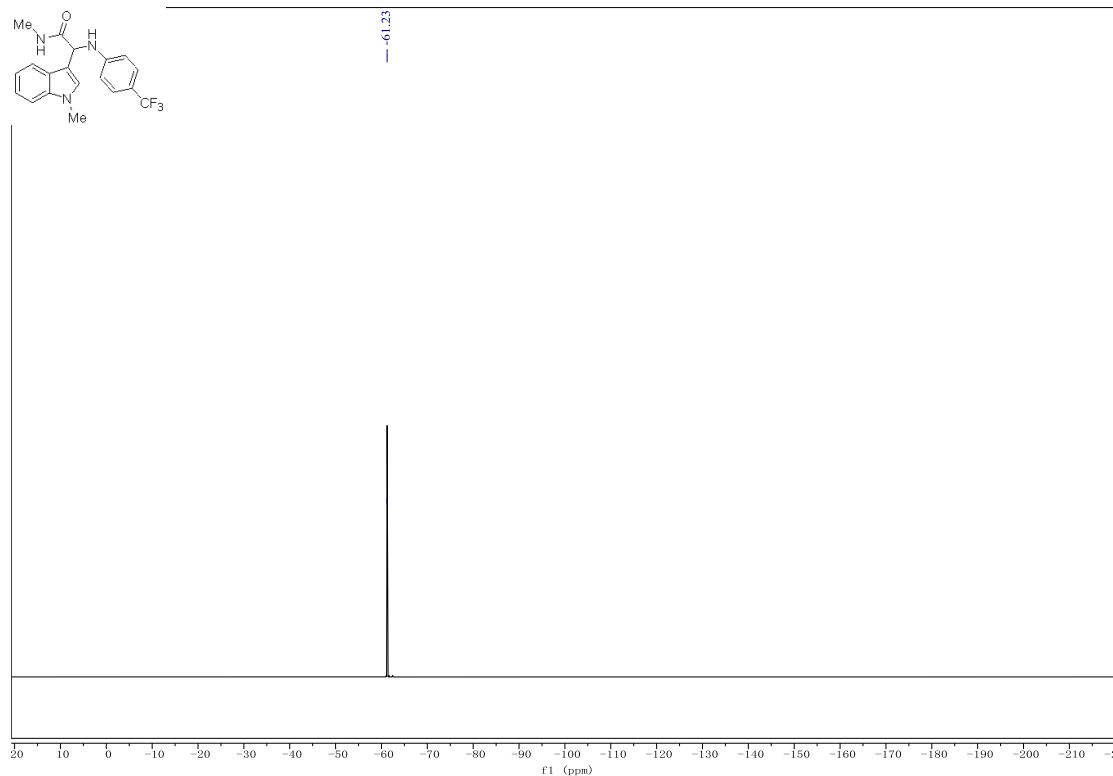

**N-methyl-2-(1-methyl-1H-indol-3-yl)-2-((4-nitrophenyl) amino)acetamide(3l)**

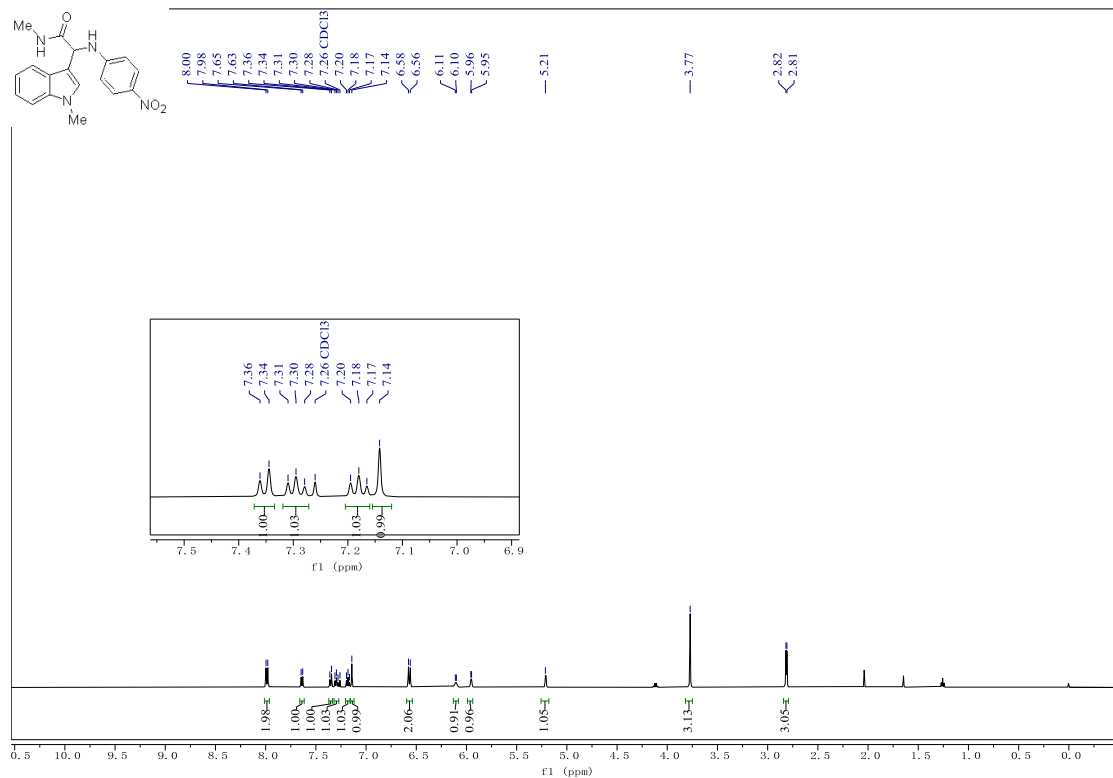



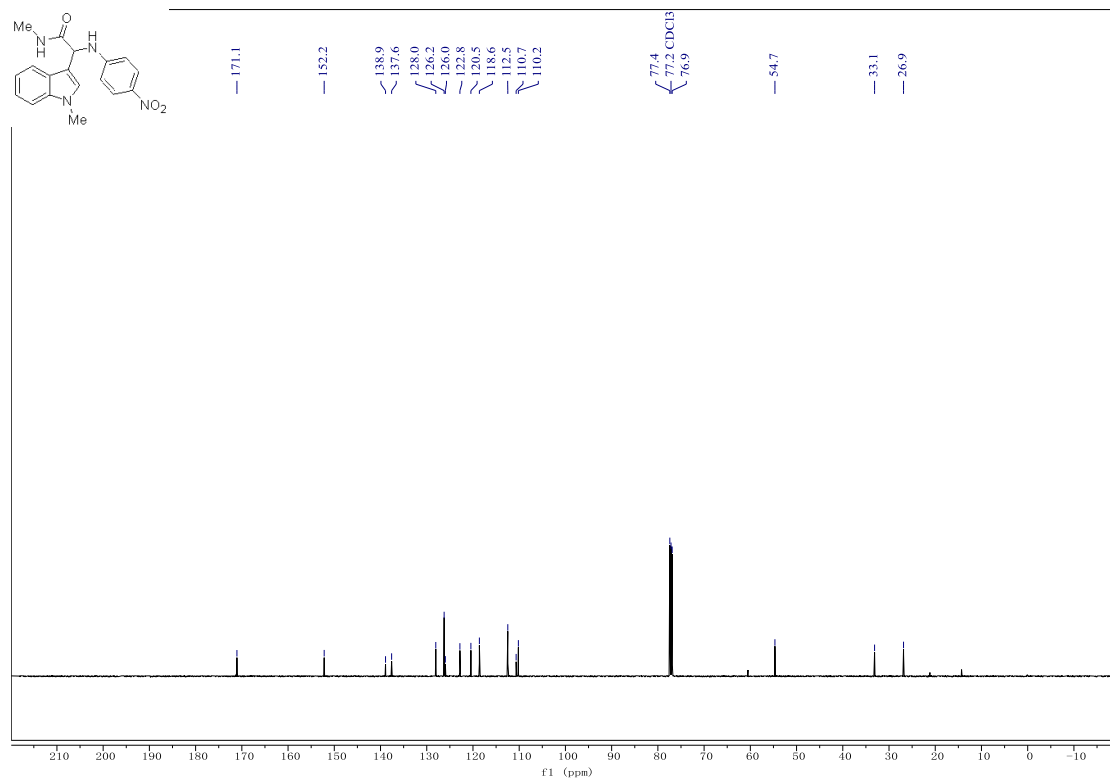

**N-methyl-2-(1-methyl-1H-indol-3-yl)-2-(*m*-tolylamino) acetamide (3m)**

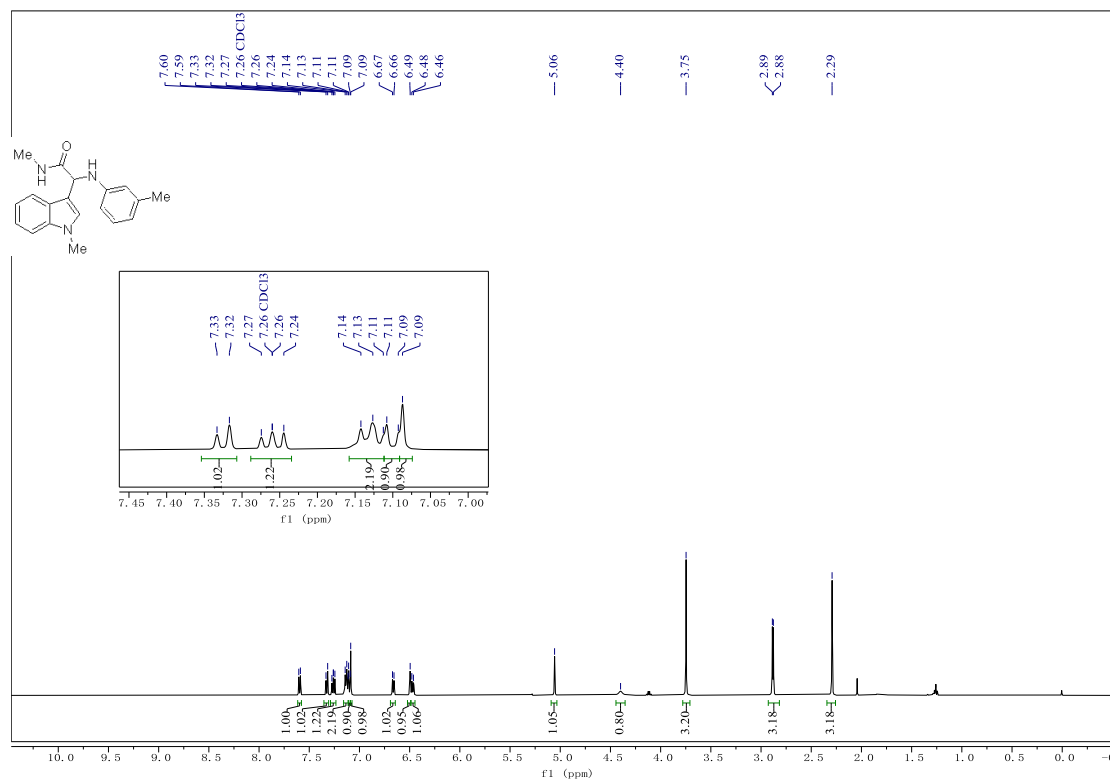

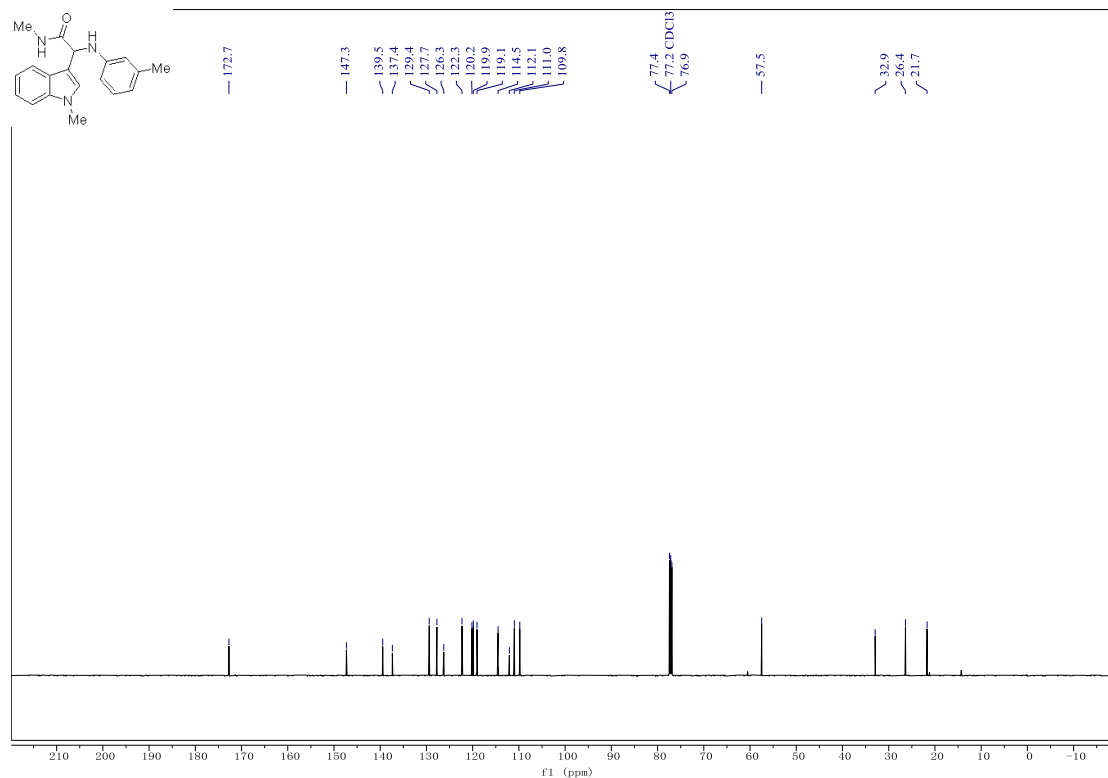

**2-((3-fluorophenyl)amino)-N-methyl-2-(1-methyl-1H-indol-3-yl)acetamide (3n)**

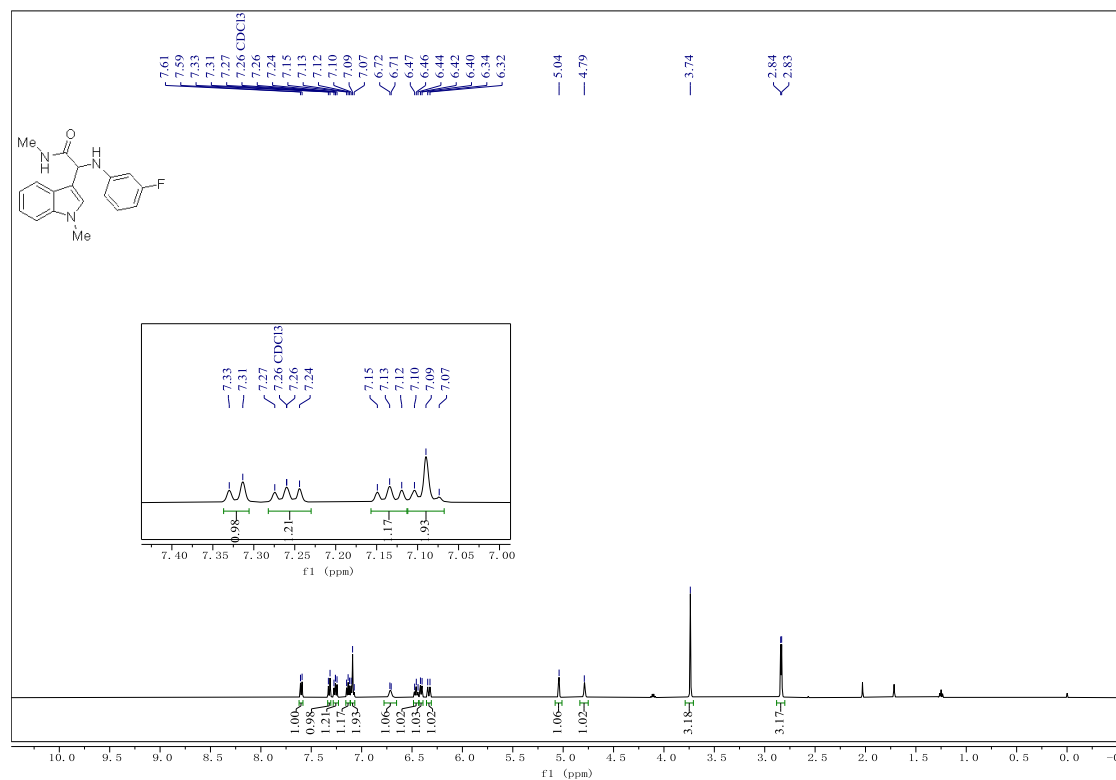

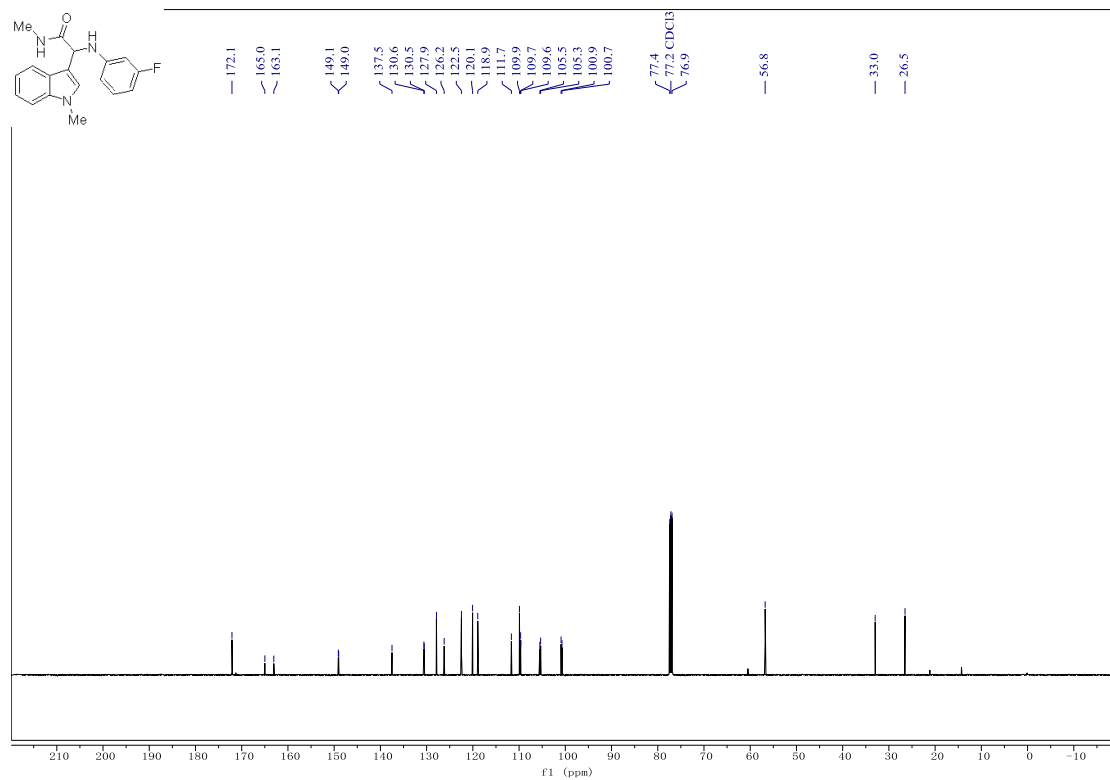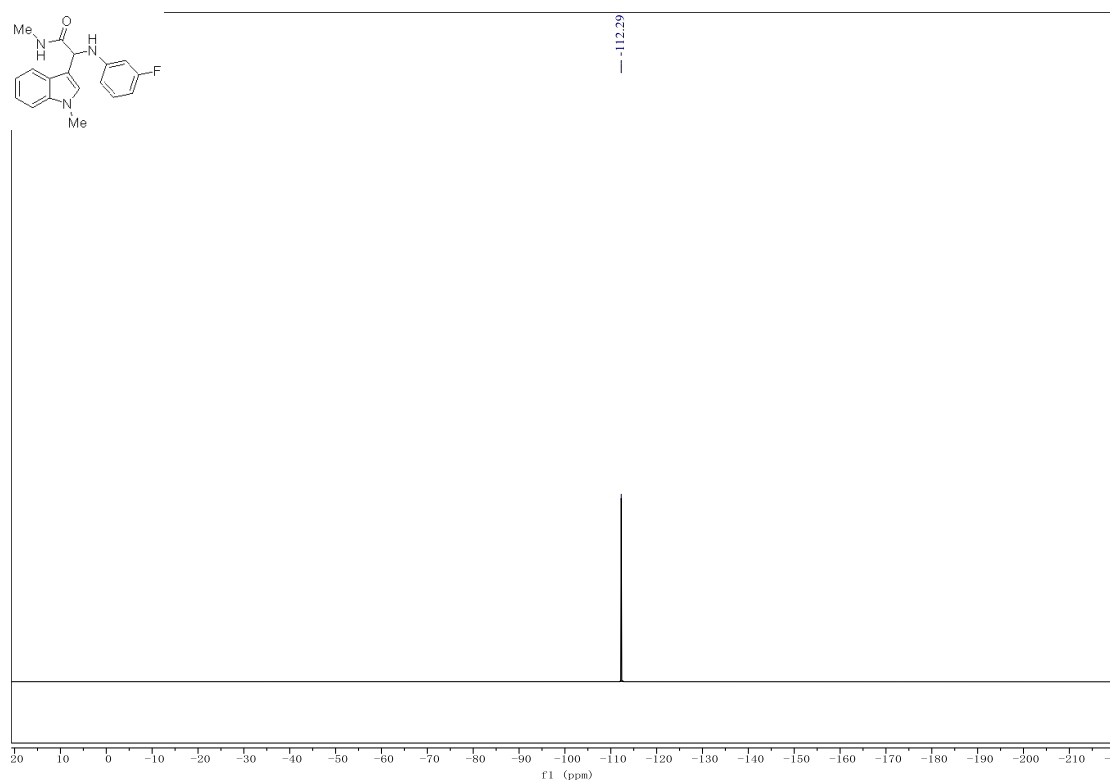

**2-((3-chlorophenyl)amino)-*N*-methyl-2-(1-methyl-1*H*-indol-3-yl)acetamide (30)**

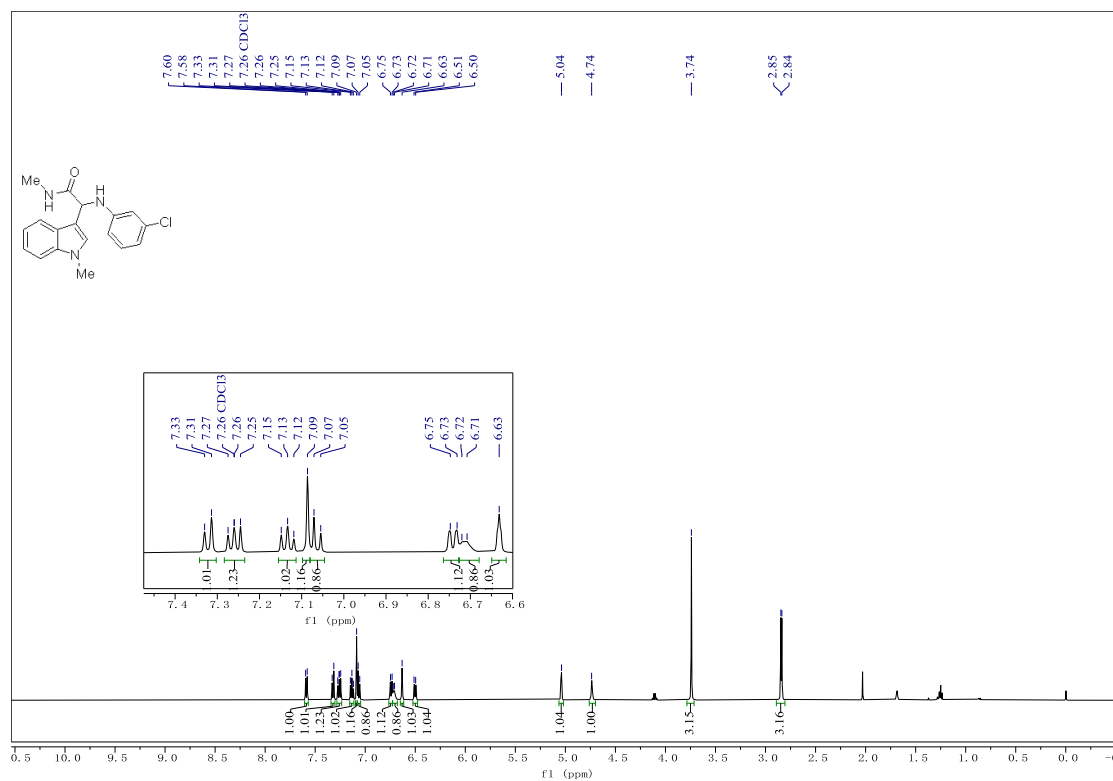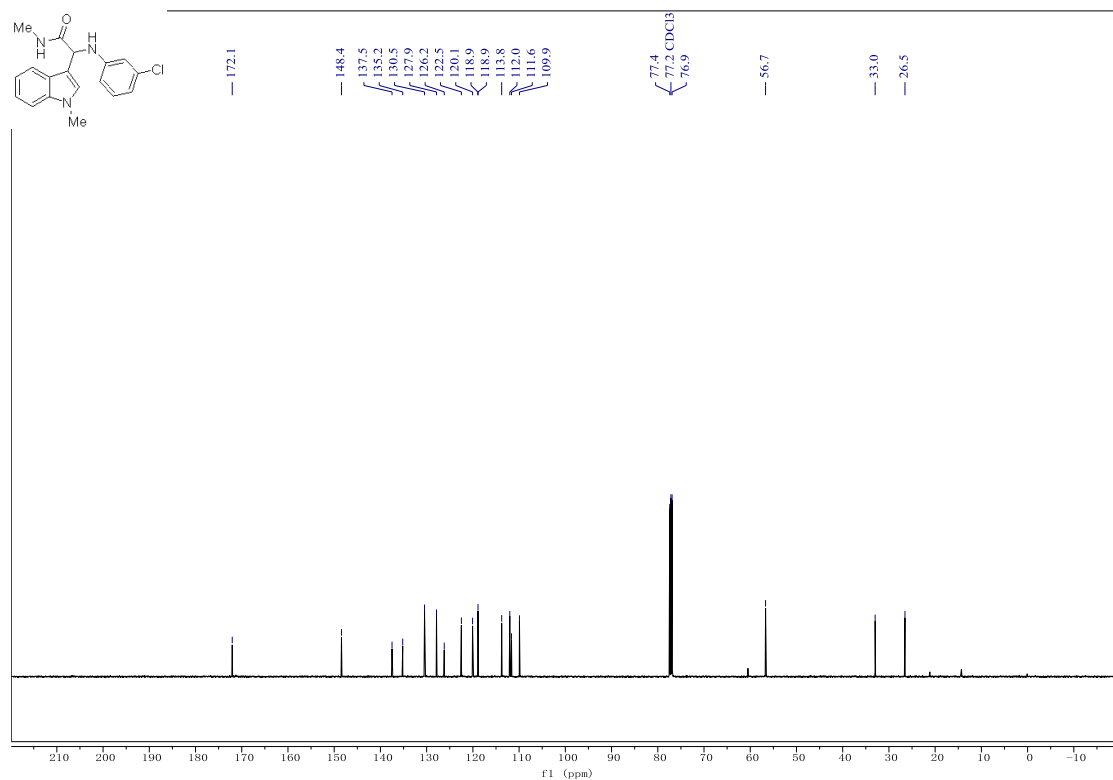

**2-((3-bromophenyl)amino)-*N*-methyl-2-(1-methyl-1*H*-indol-3-yl) acetamide (3p)**

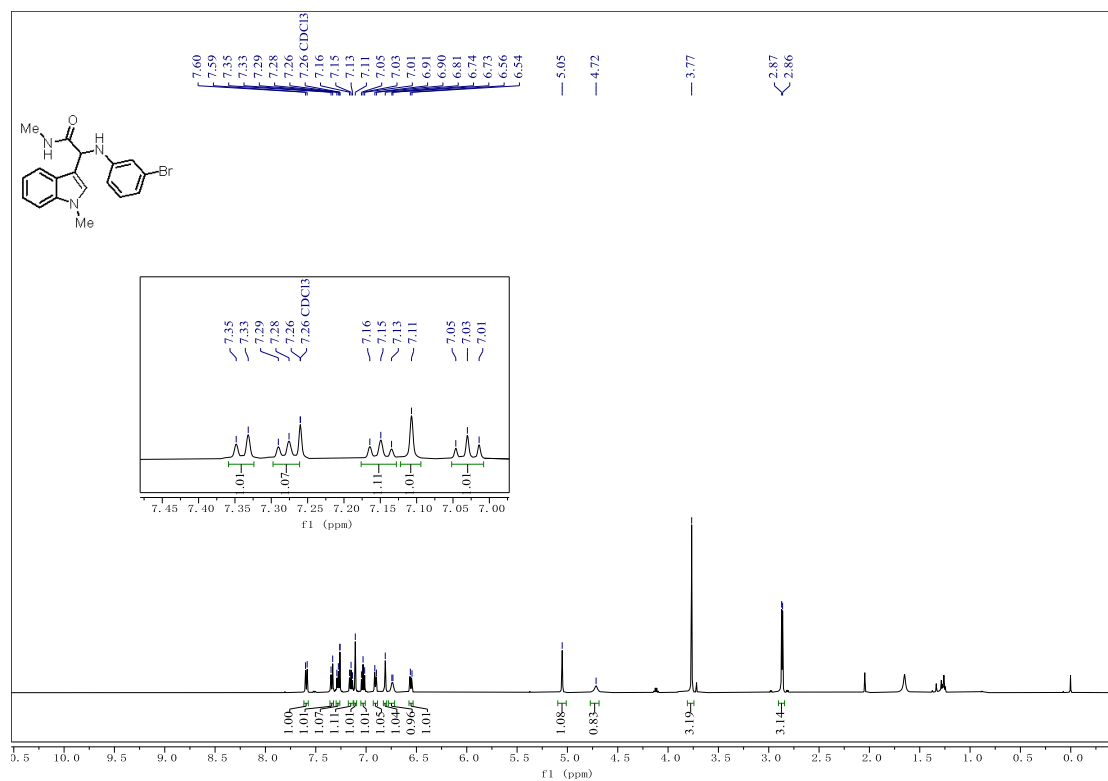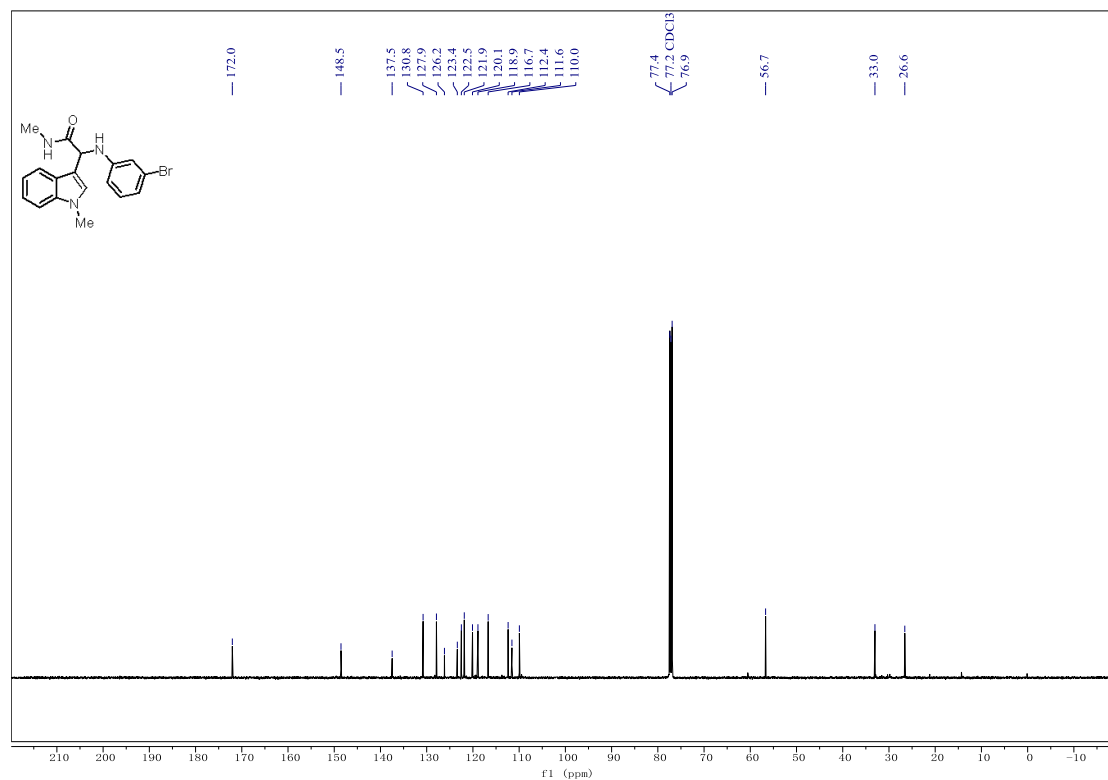

**2-((3-iodophenyl)amino)-*N*-methyl-2-(1-methyl-1*H*-indol-3-yl)acetamide (3q)**

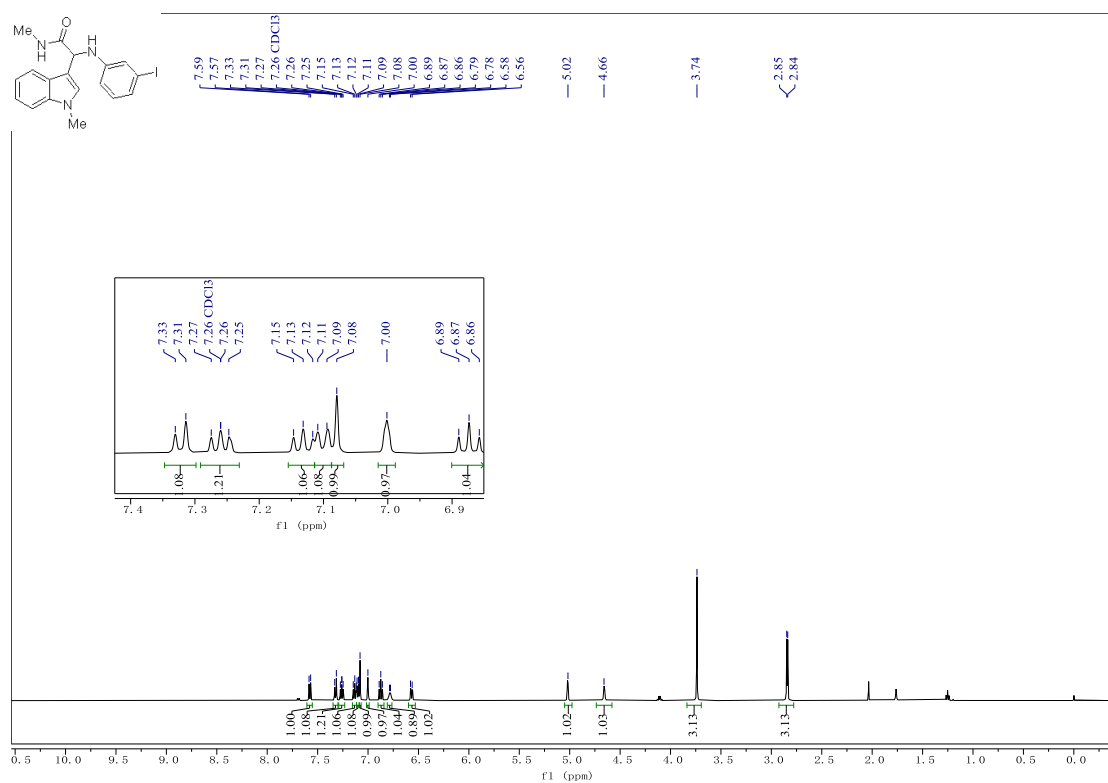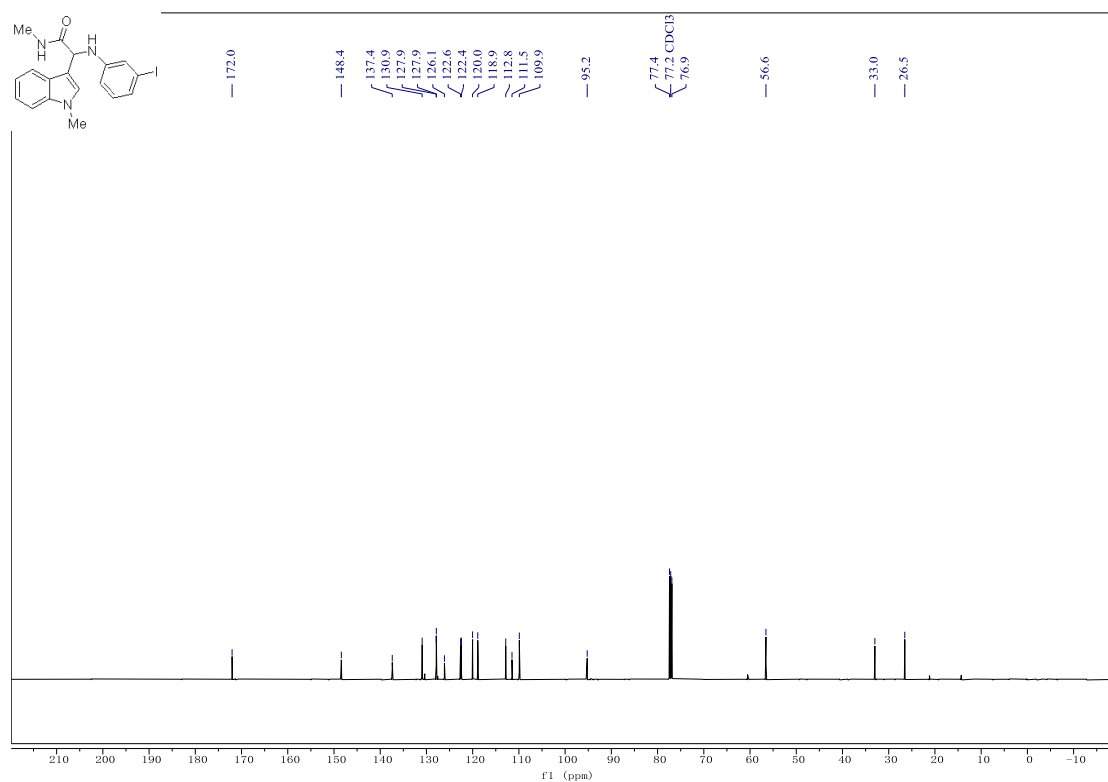

***N*-methyl-2-(1-methyl-1*H*-indol-3-yl)-2-((3-nitrophenyl)amino)acetamide (3r)**

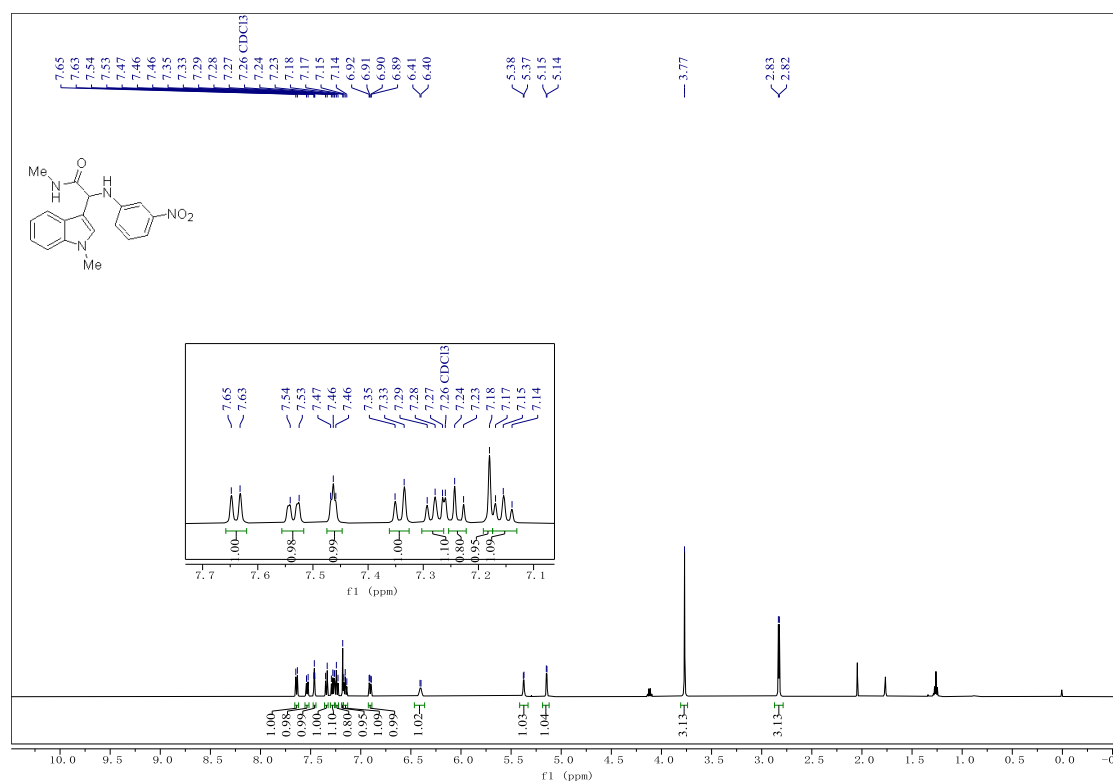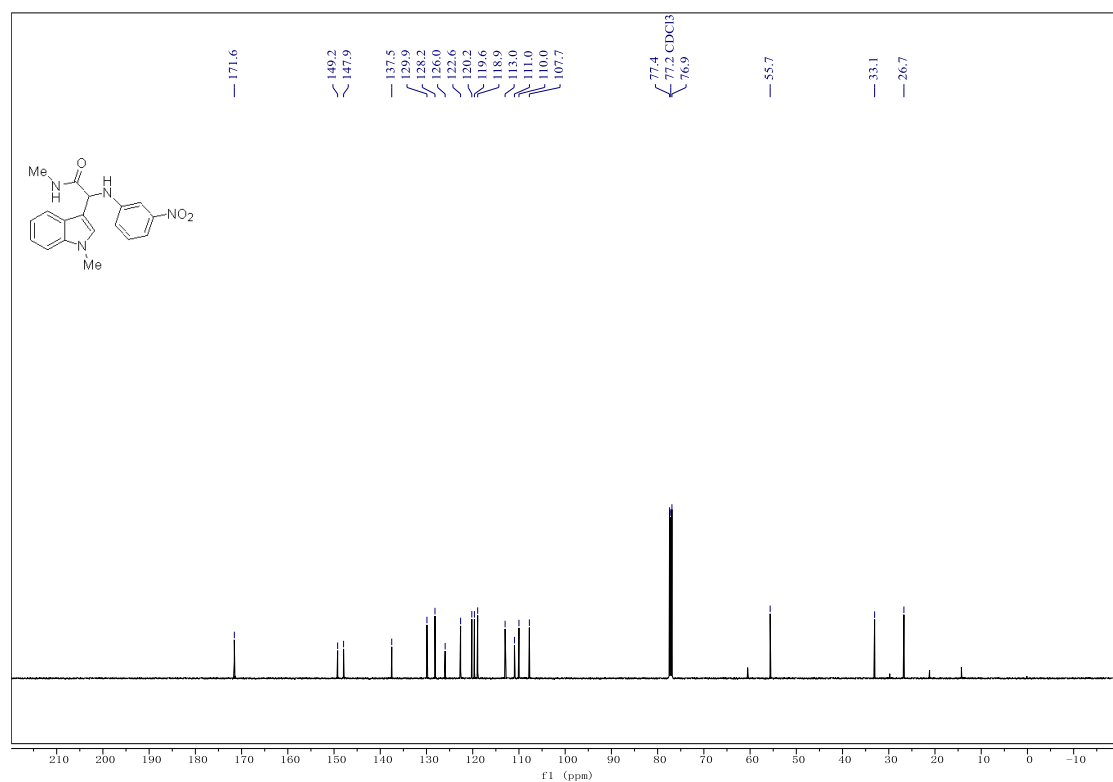

**2-((2-methoxyphenyl)amino)-*N*-methyl-2-(1-methyl-1*H*-indol-3-yl)acetamide (3s)**

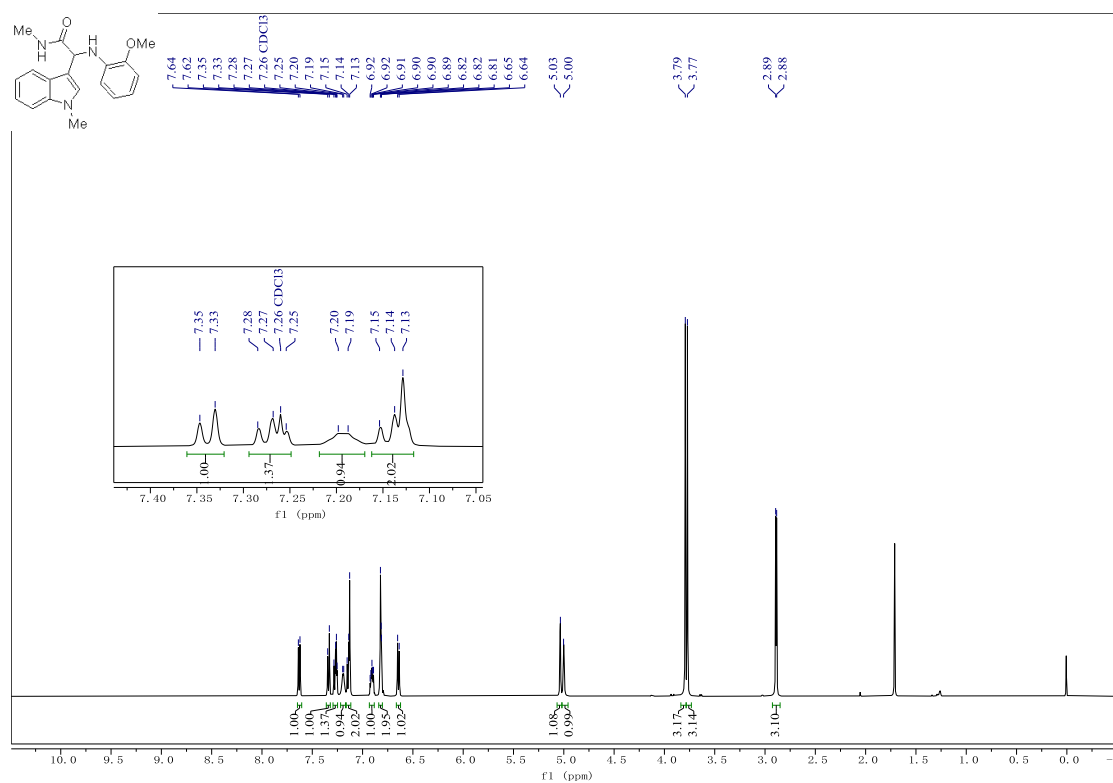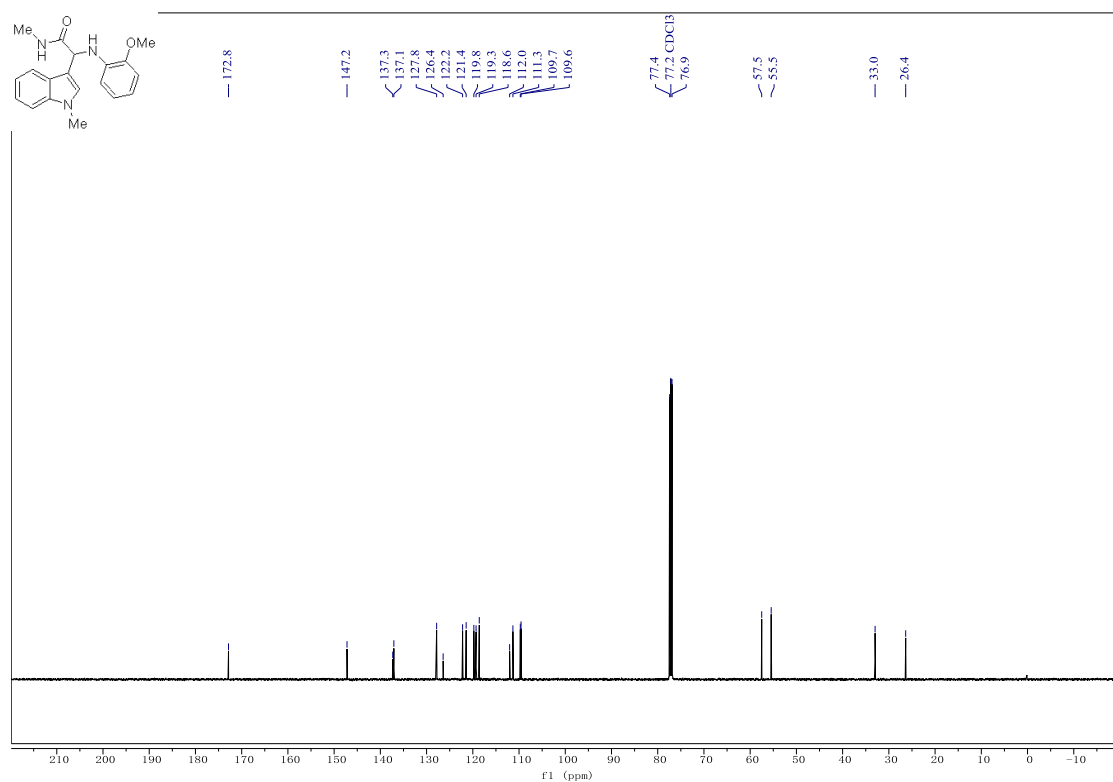



***N*-methyl-2-(1-methyl-1*H*-indol-3-yl)-2-(*o*-tolylamino)acetamide (3t)**

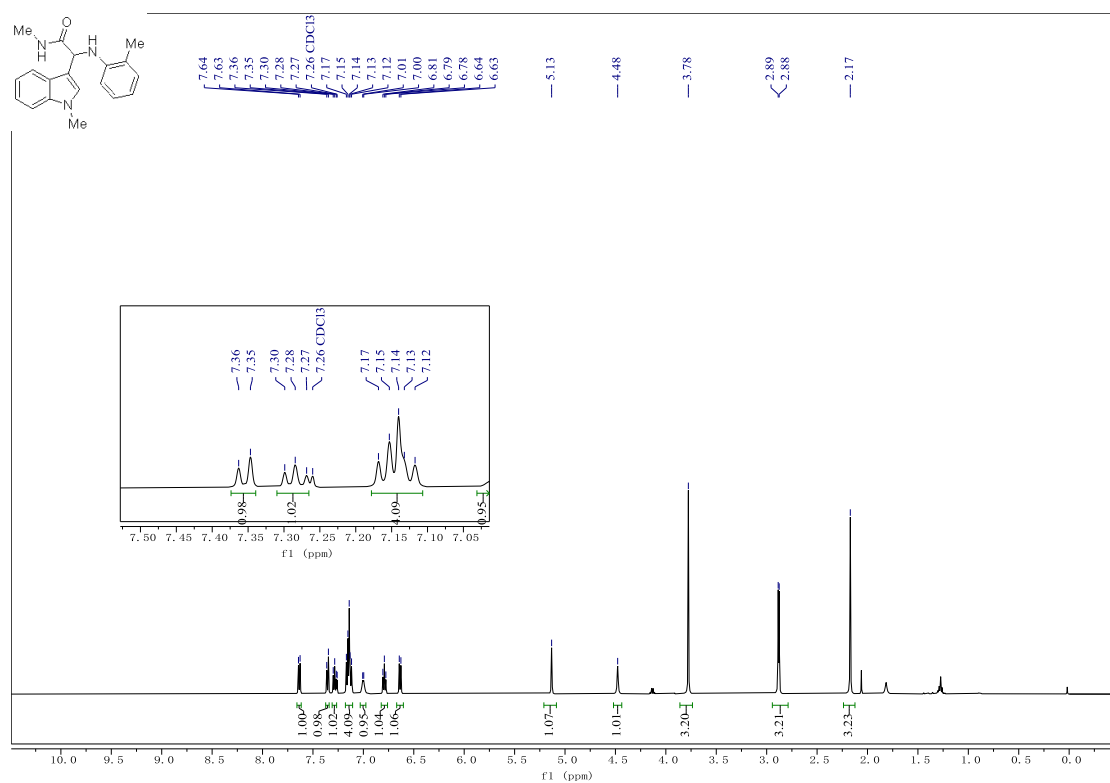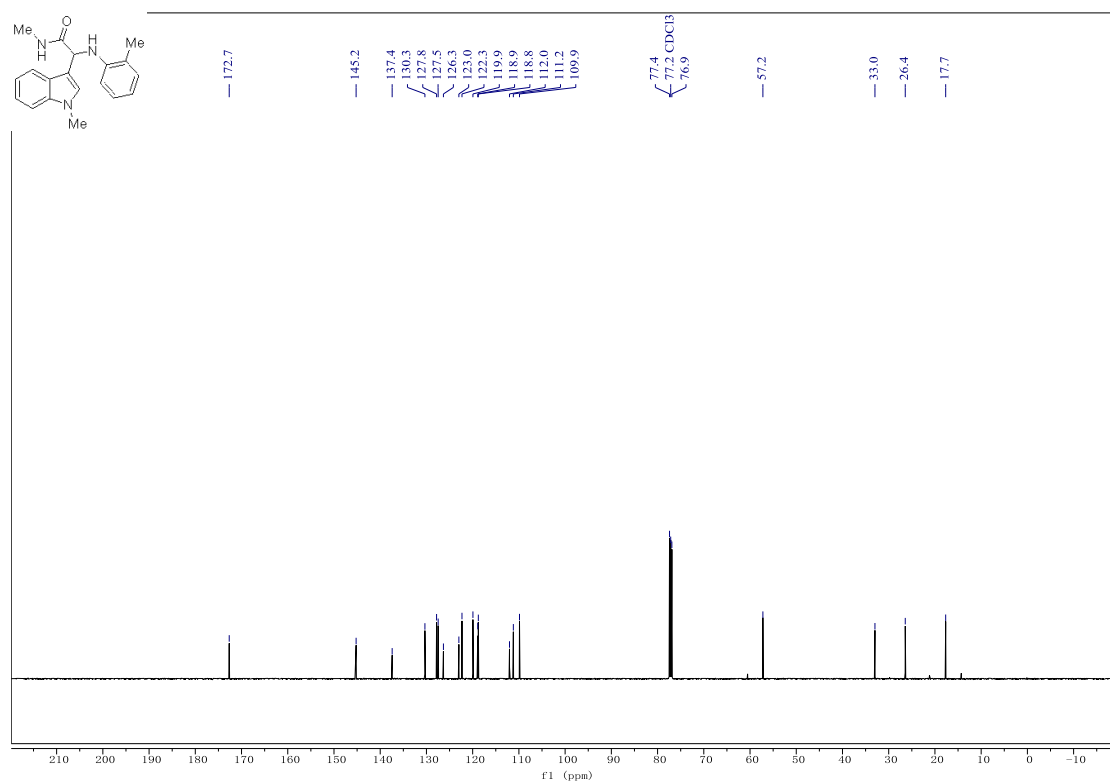

**2-((2,3-dimethylphenyl)amino)-*N*-methyl-2-(1-methyl-1*H*-indol-3-yl)acetamide (3u)**

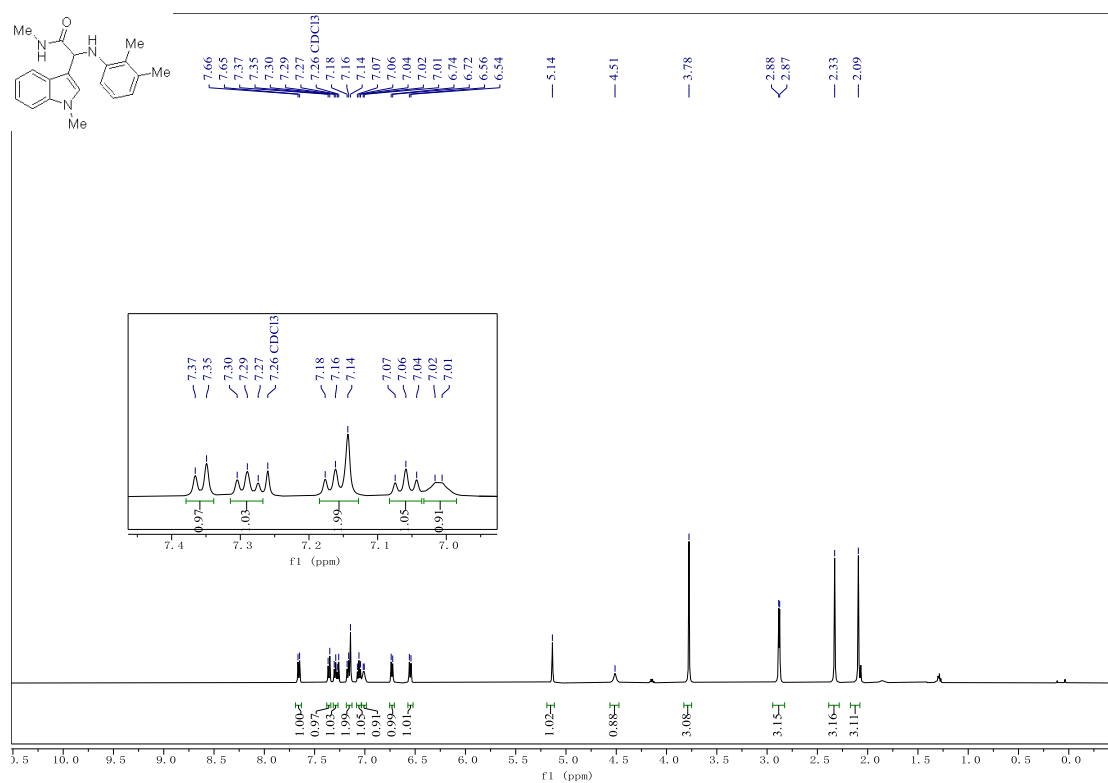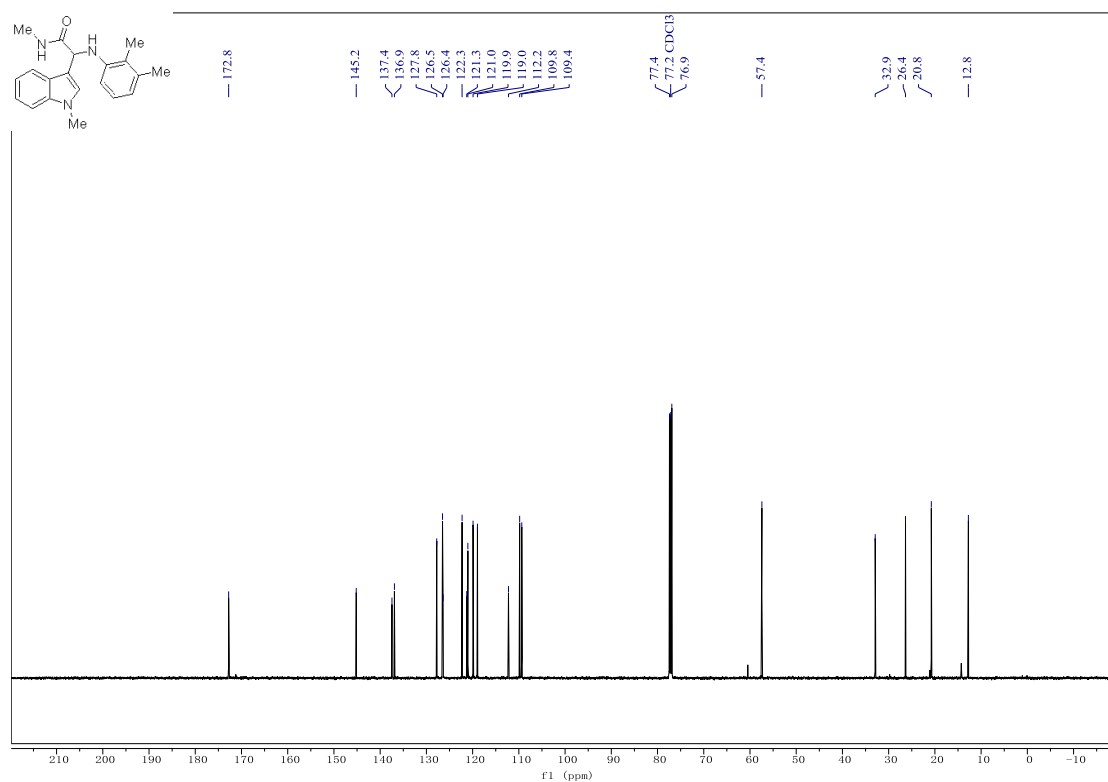

2-((3-fluoro-2-methylphenyl)amino)-*N*-methyl-2-(1-methyl-1*H*-indol-3-yl)acetamide (3v)

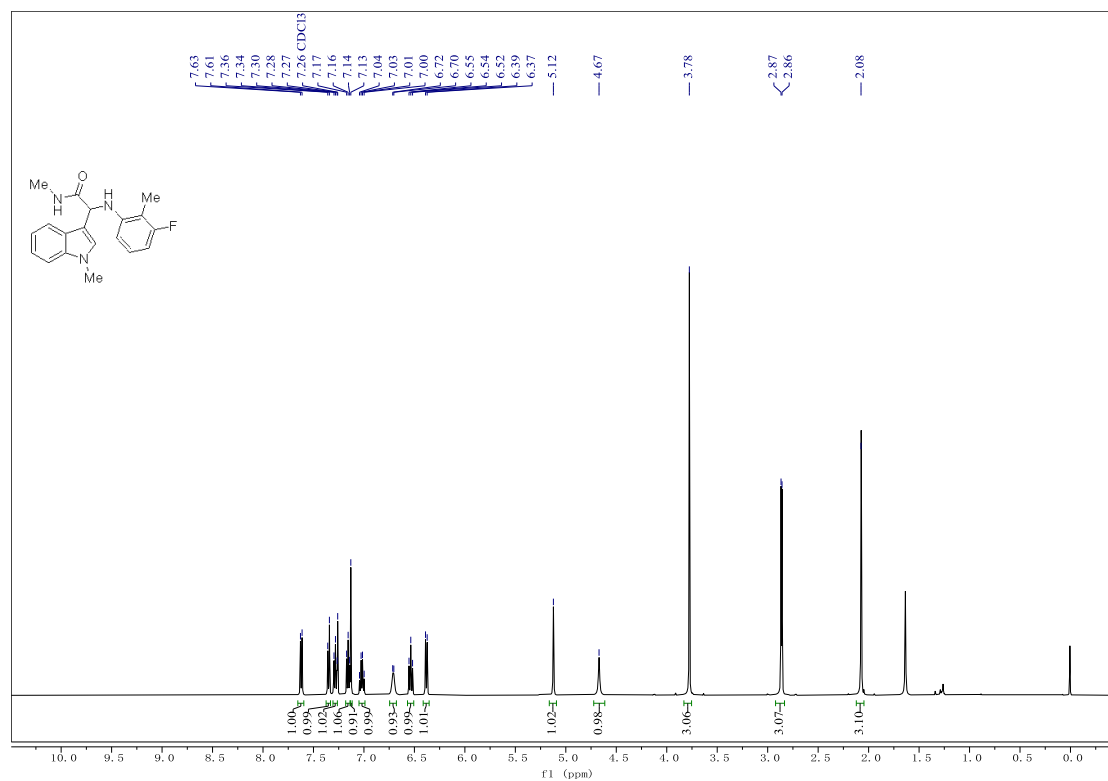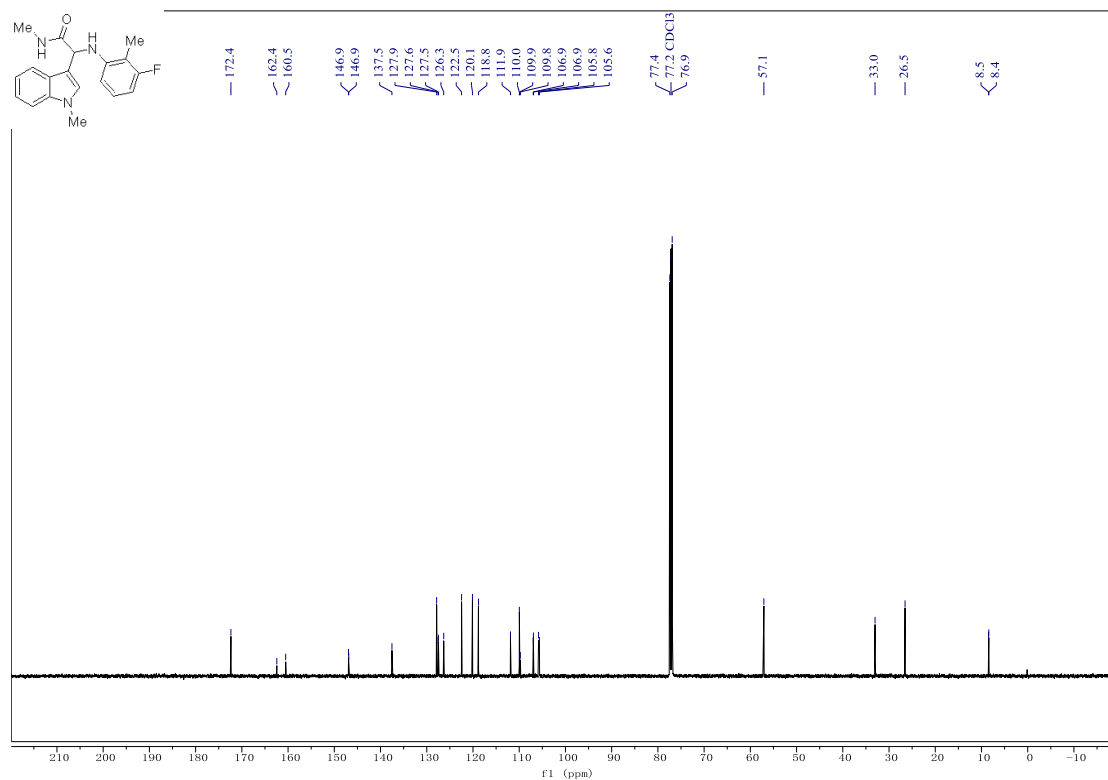

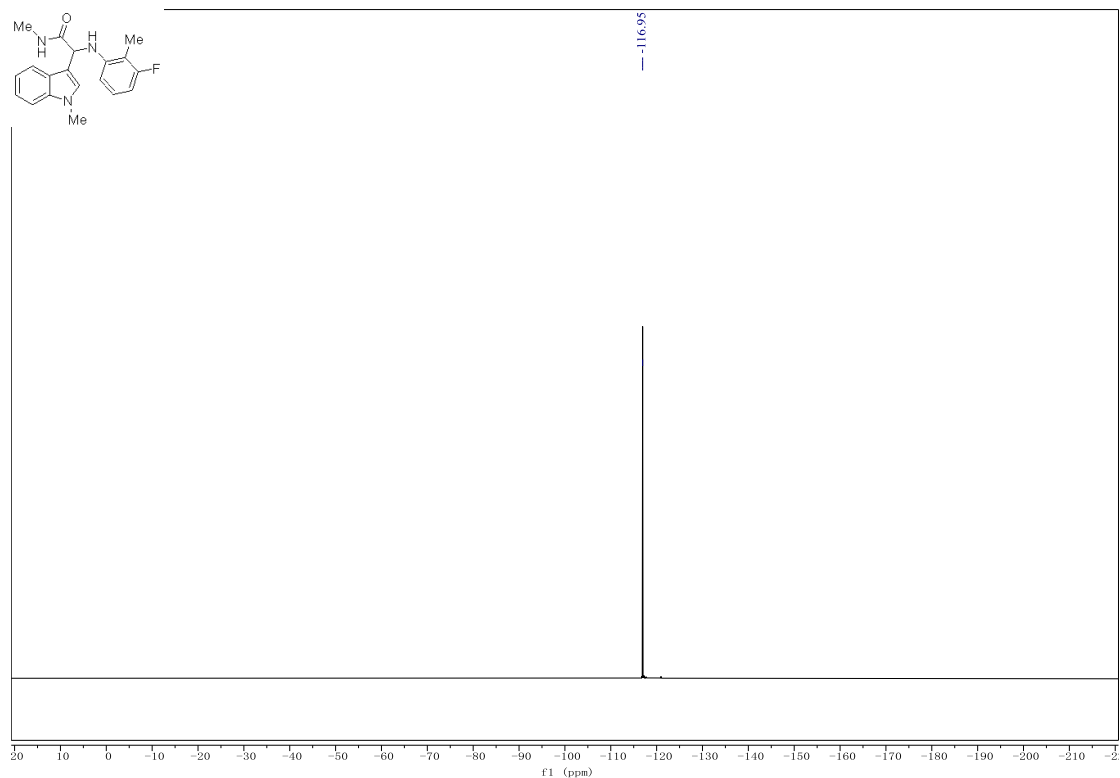

**2-((2-chloro-3-fluorophenyl)amino)-*N*-methyl-2-(1-methyl-1*H*-indol-3-yl)acetamide (3w)**

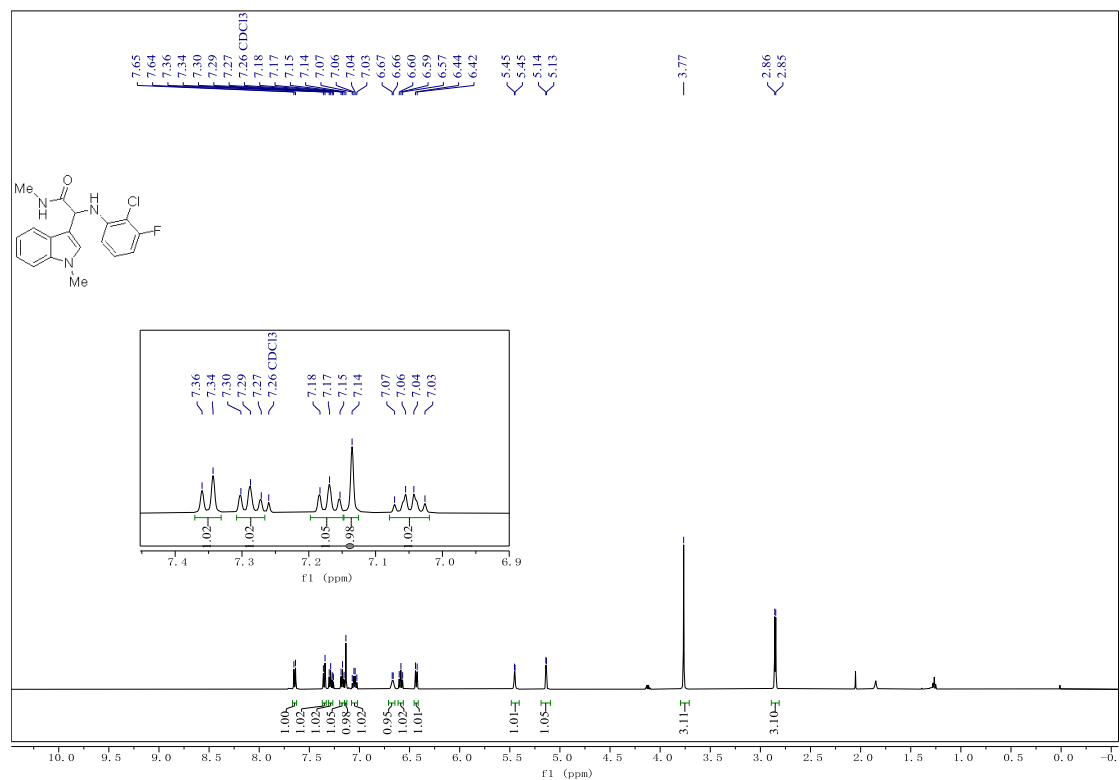

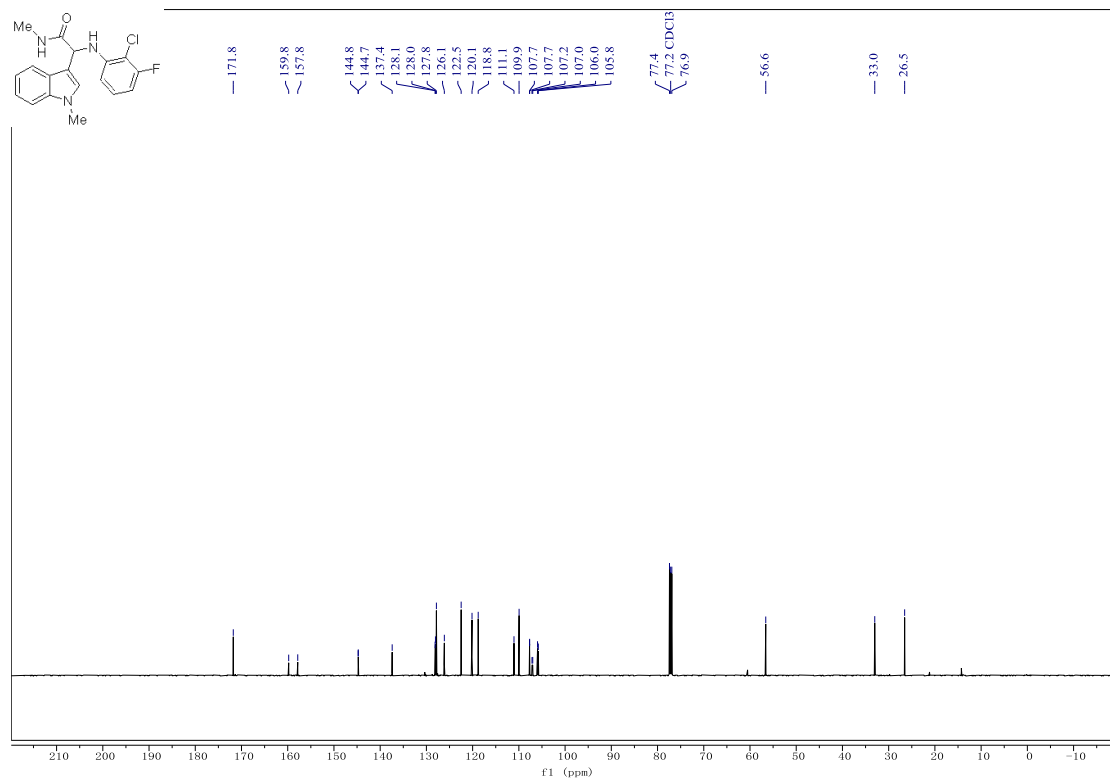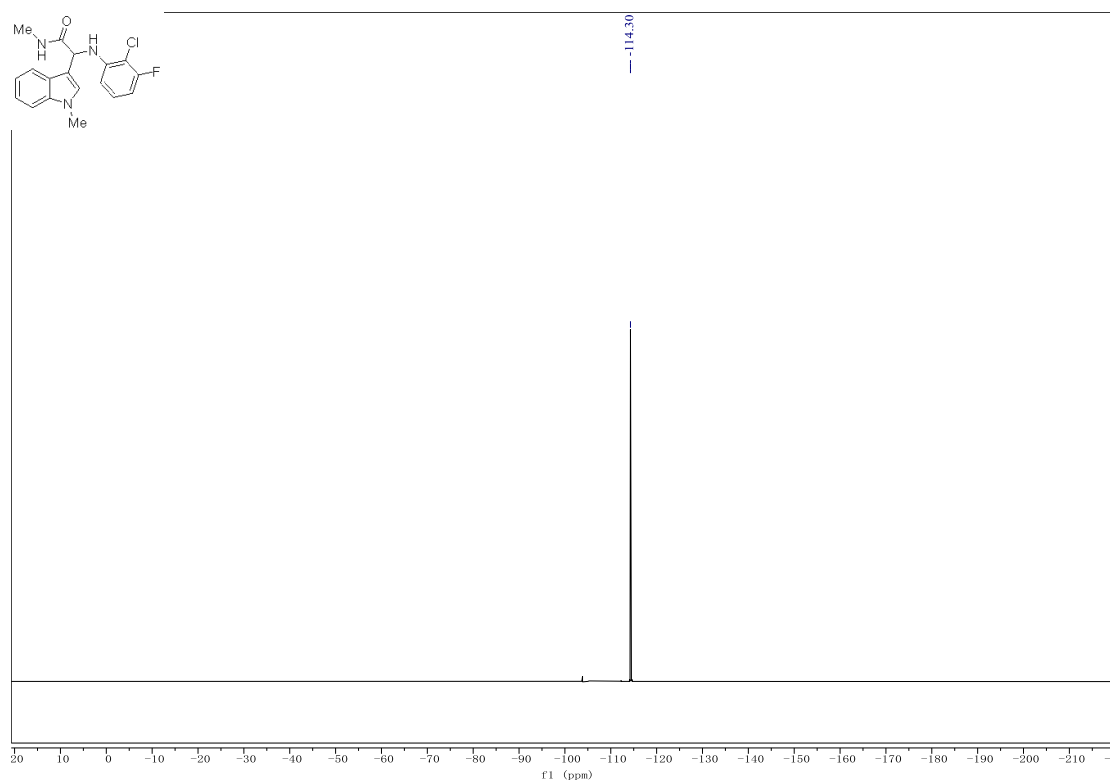

2-((5-fluoro-2-methylphenyl)amino)-*N*-methyl-2-(1-methyl-1*H*-indol-3-yl)acetamide(3x)

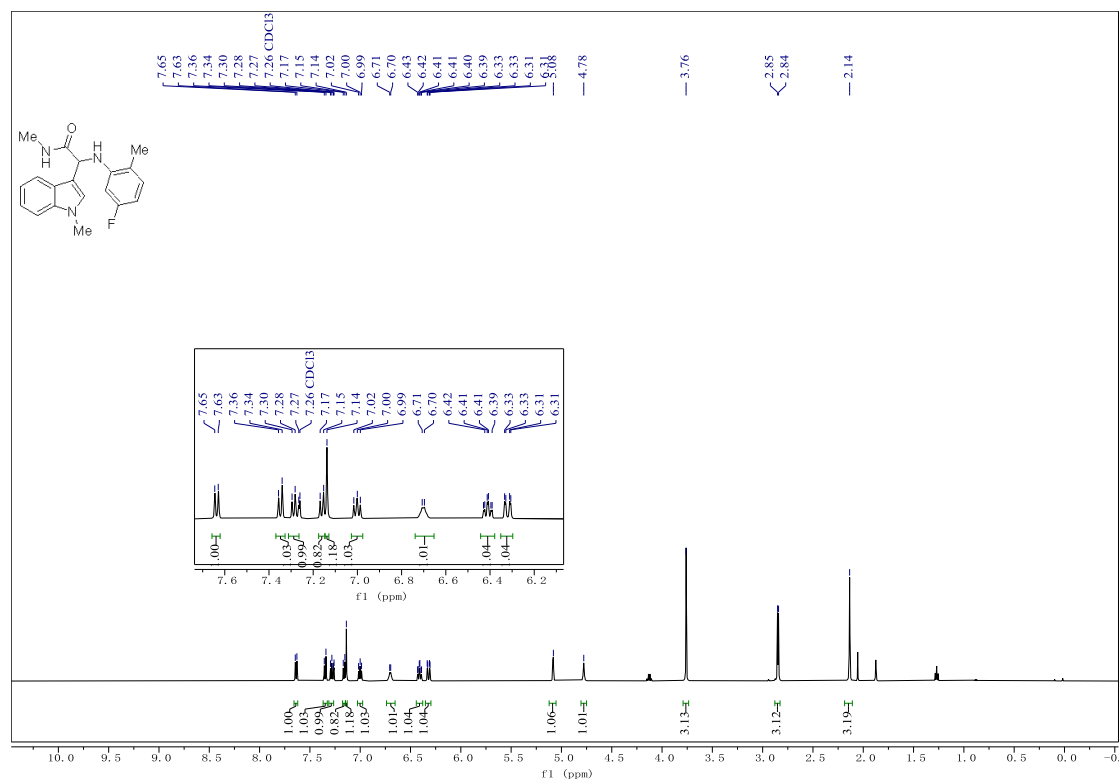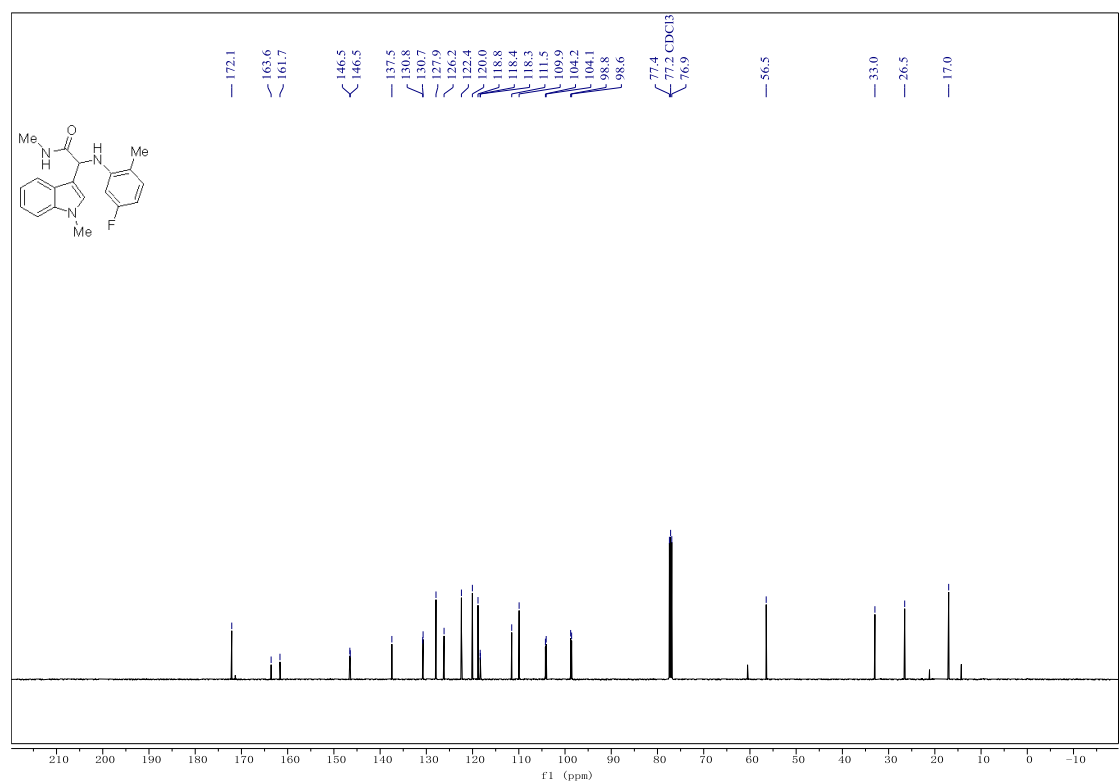

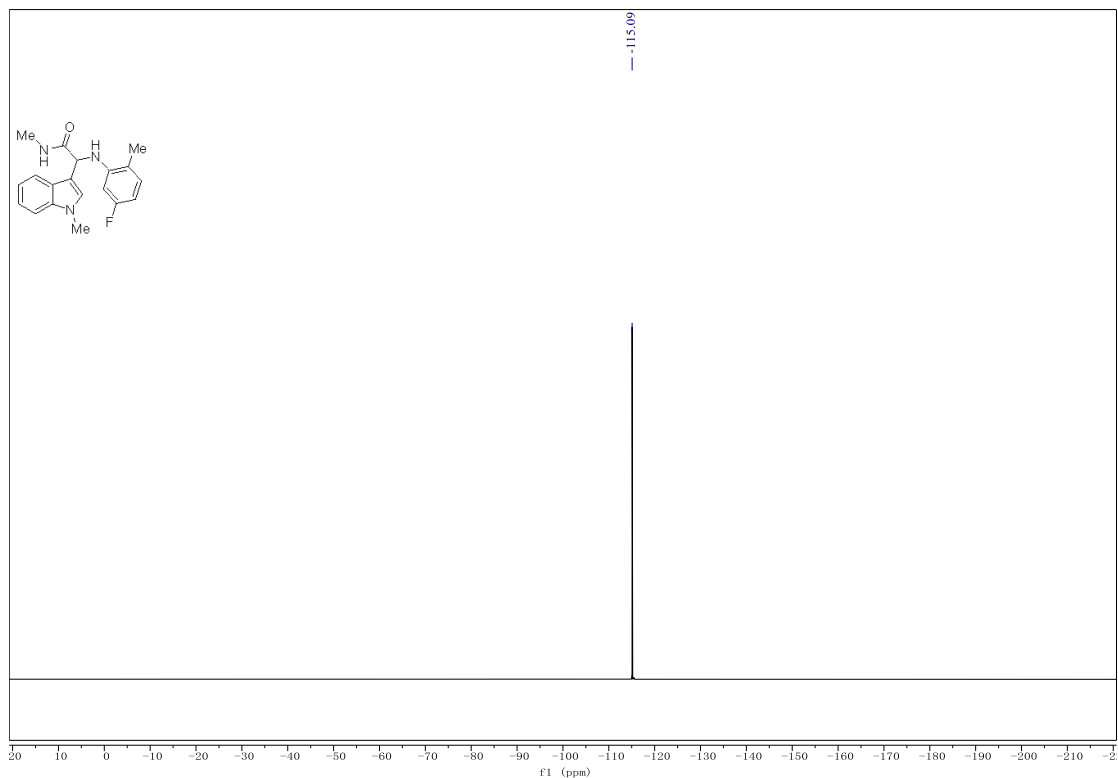

**2-((2-chloro-5-fluorophenyl)amino)-N-methyl-2-(1-methyl-1H-indol-3-yl)acetamide(3y)**

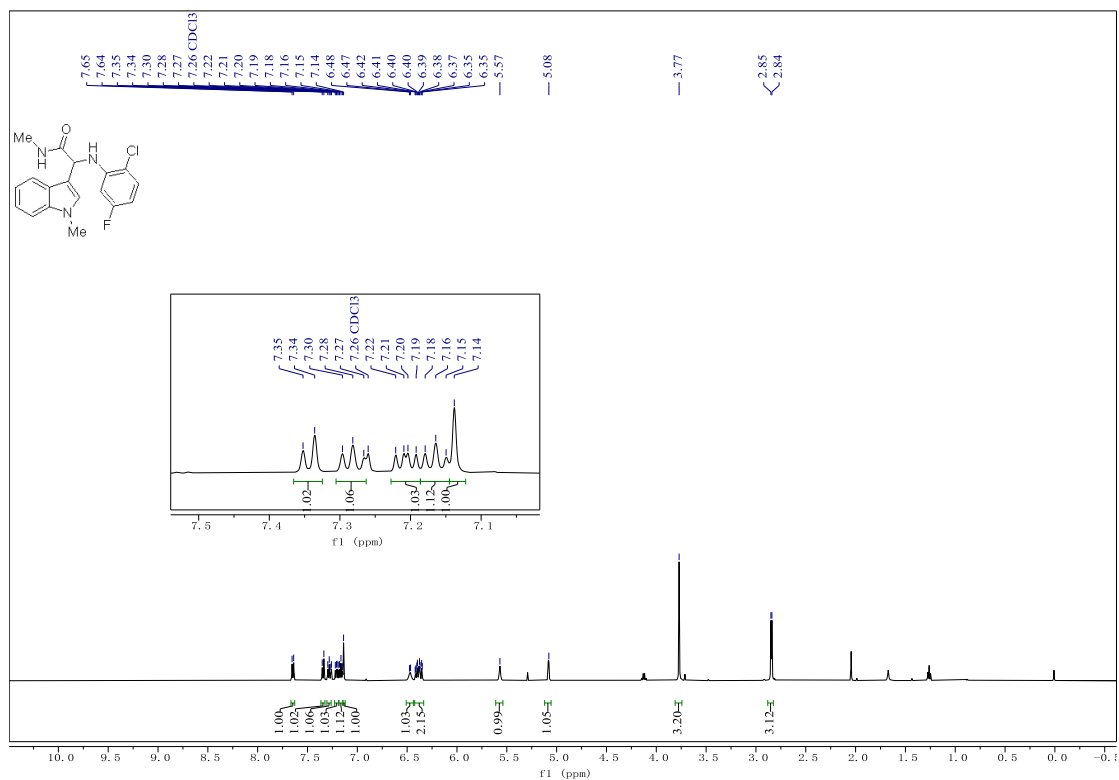

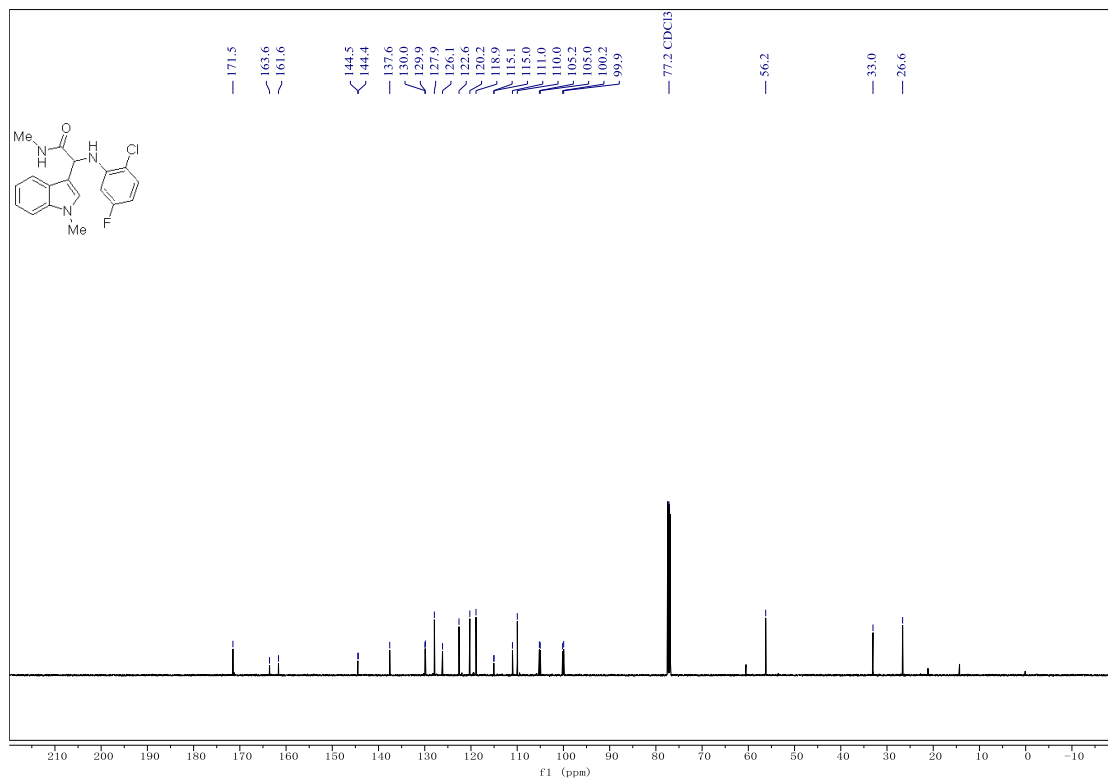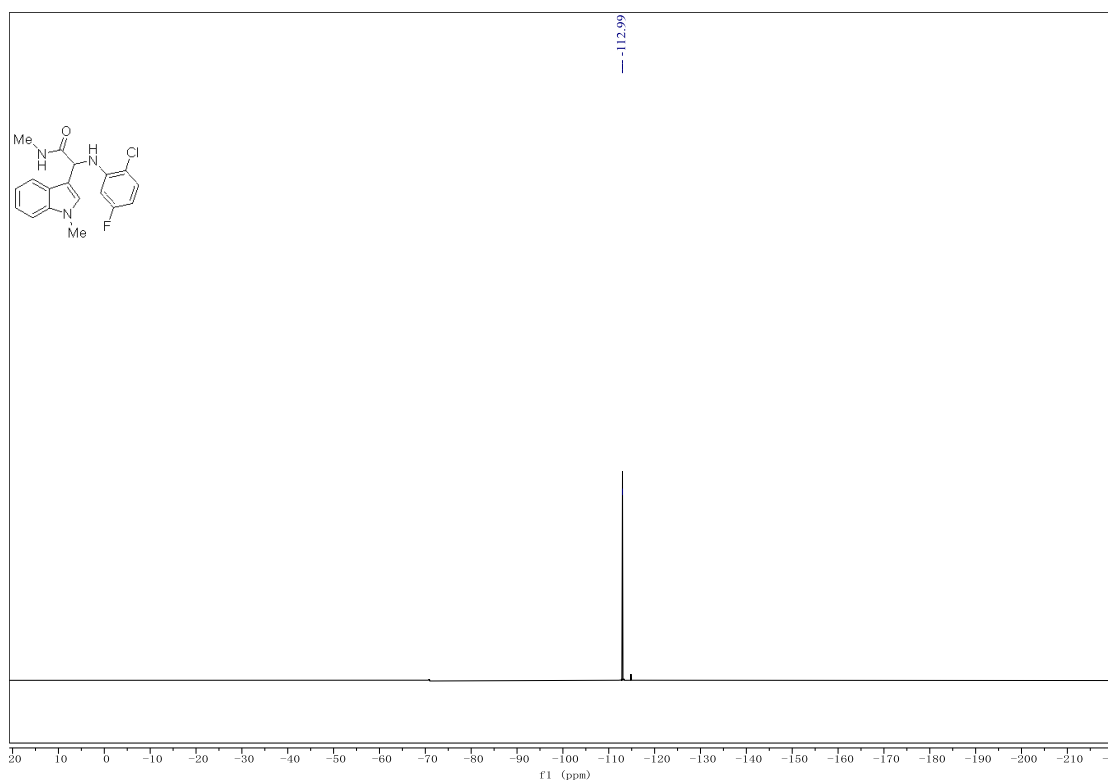



**2-((3-fluoro-4-methoxyphenyl)amino)-*N*-methyl-2-(1-methyl-1*H*-indol-3-yl)acetamide (3z)**

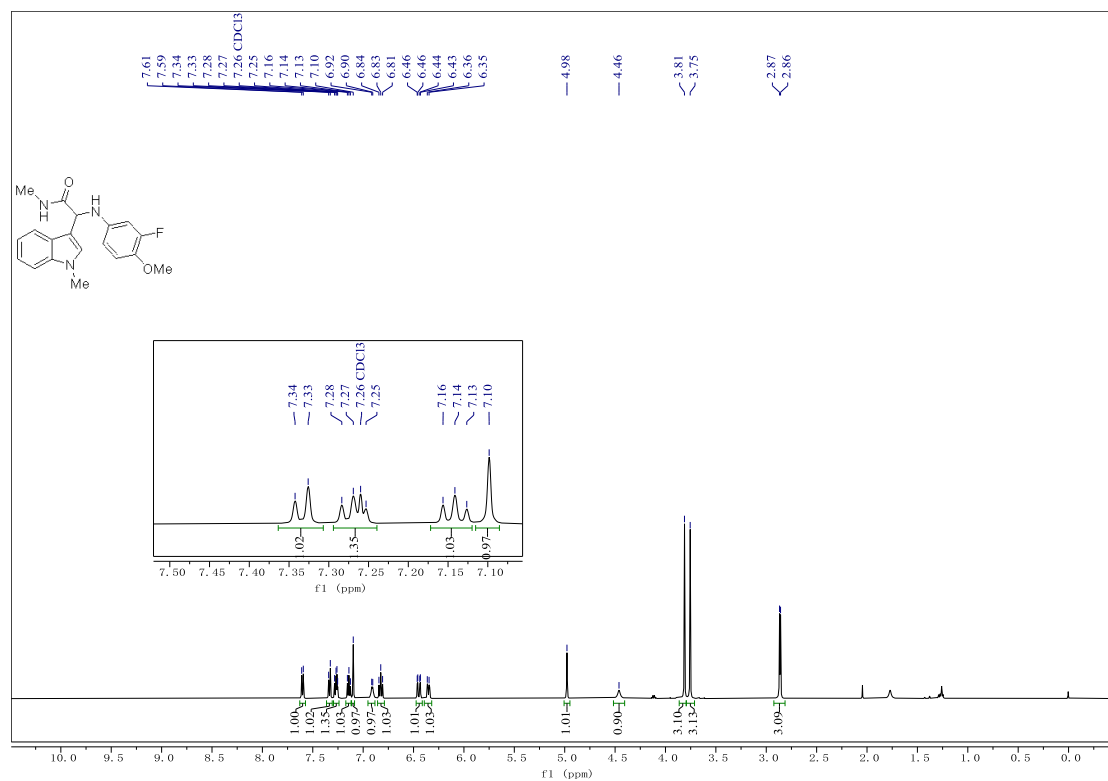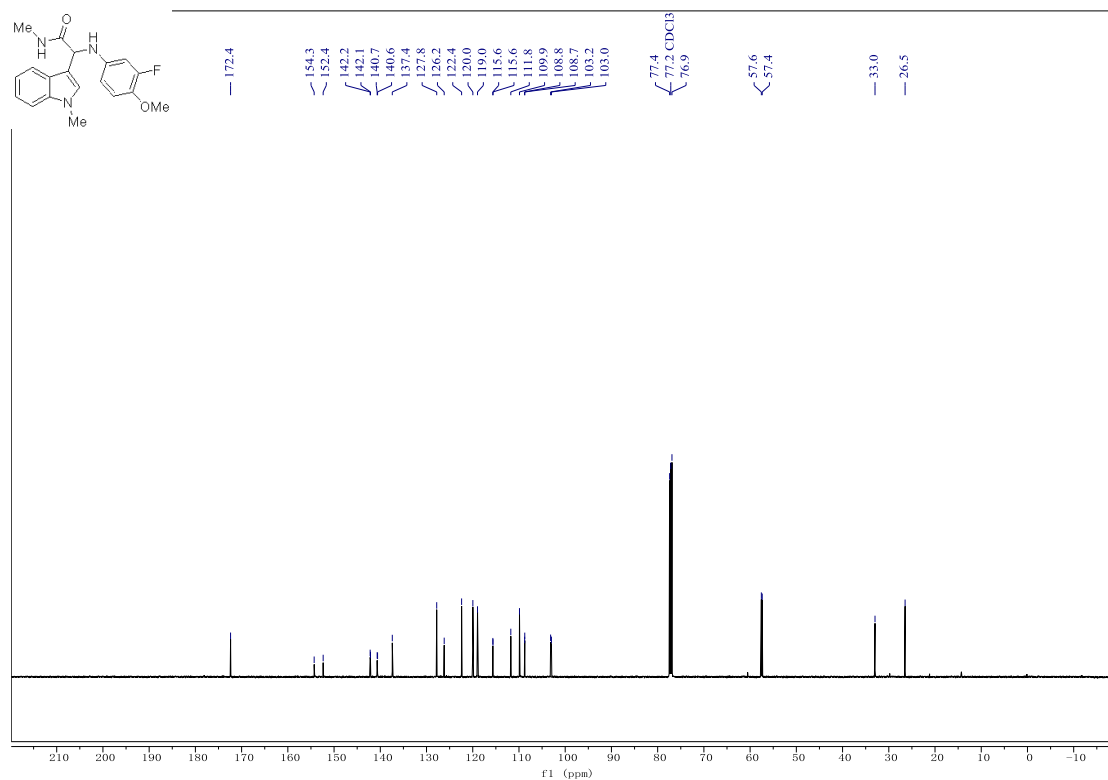

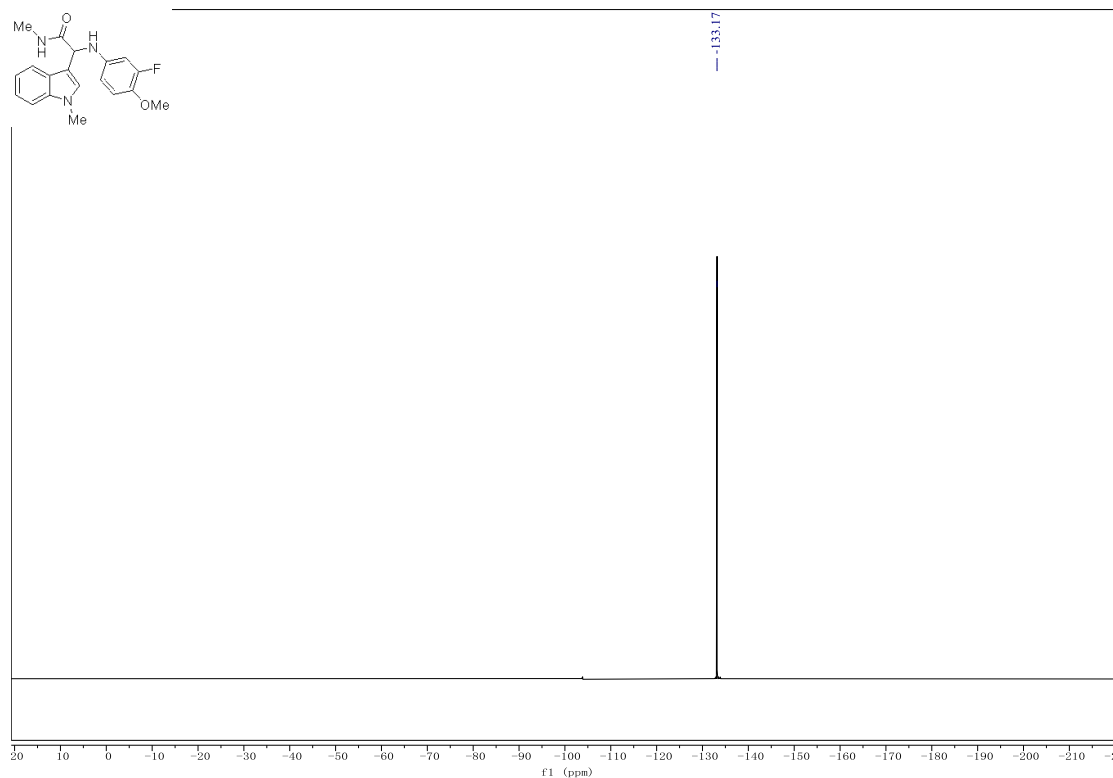

**2-((2,3-dimethoxyphenyl)amino)-N-methyl-2-(1-methyl-1H-indol-3-yl)acetamide (3aa)**

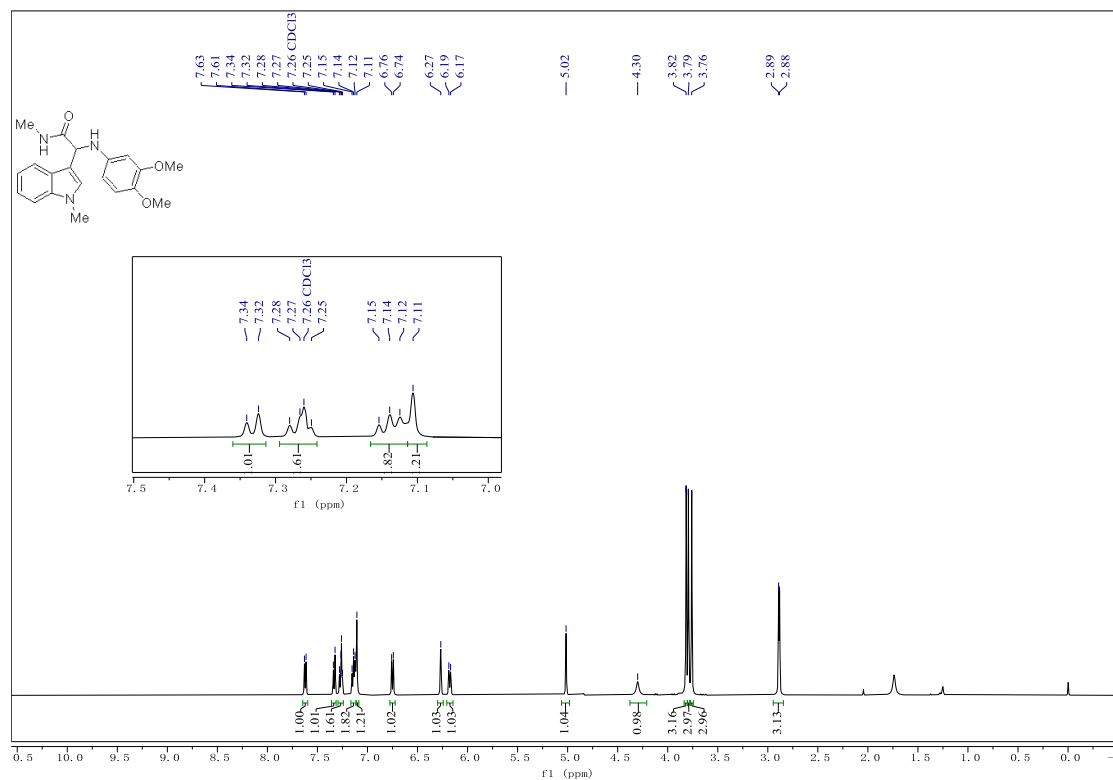

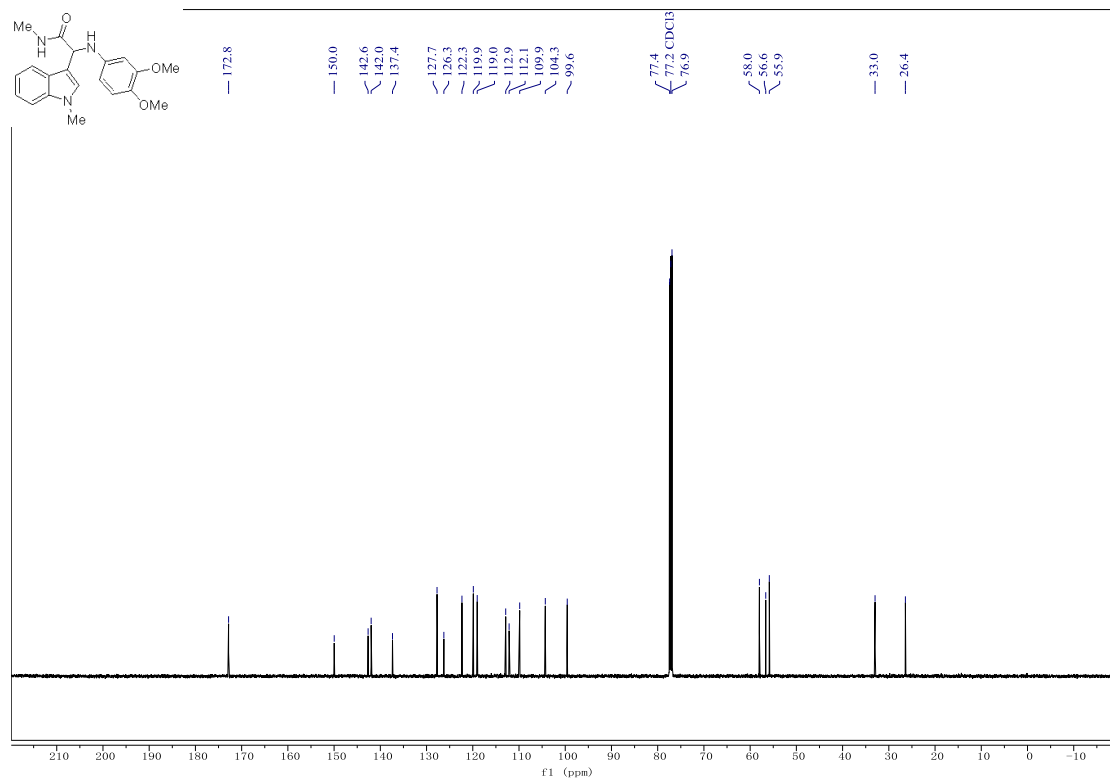

**2-((3-bromo-4-methylphenyl)amino)-N-methyl-2-(1-methyl-1H-indol-3-yl)acetamide (3ab)**

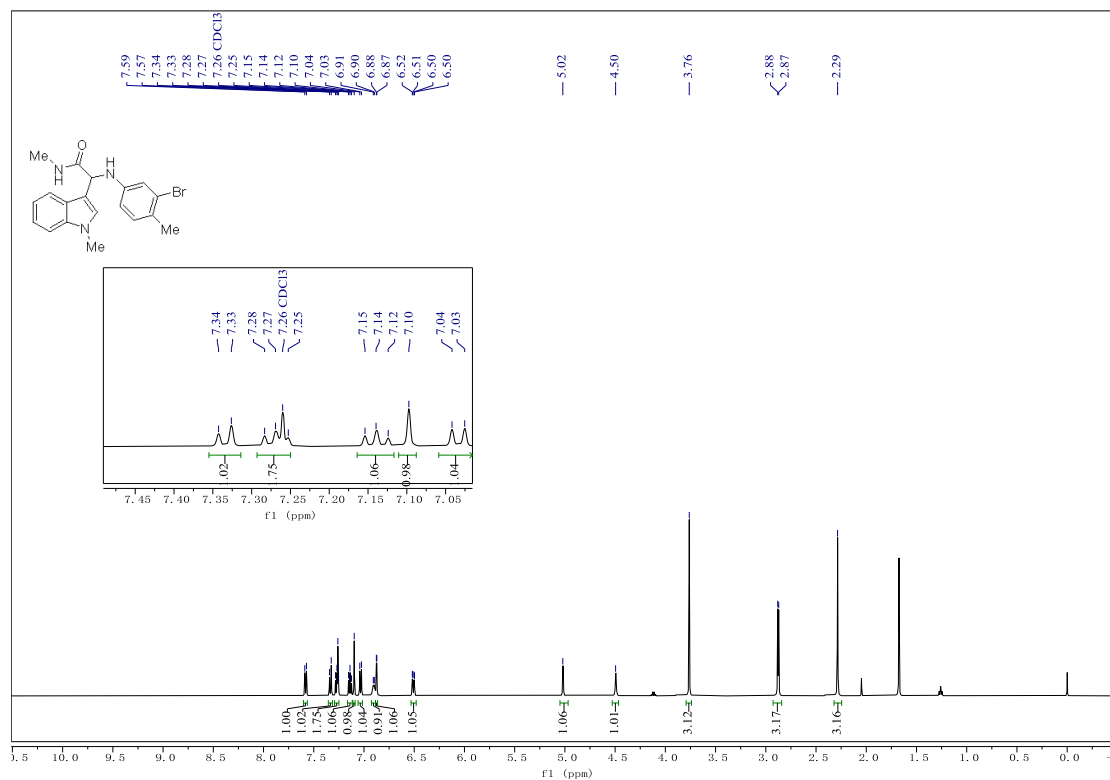

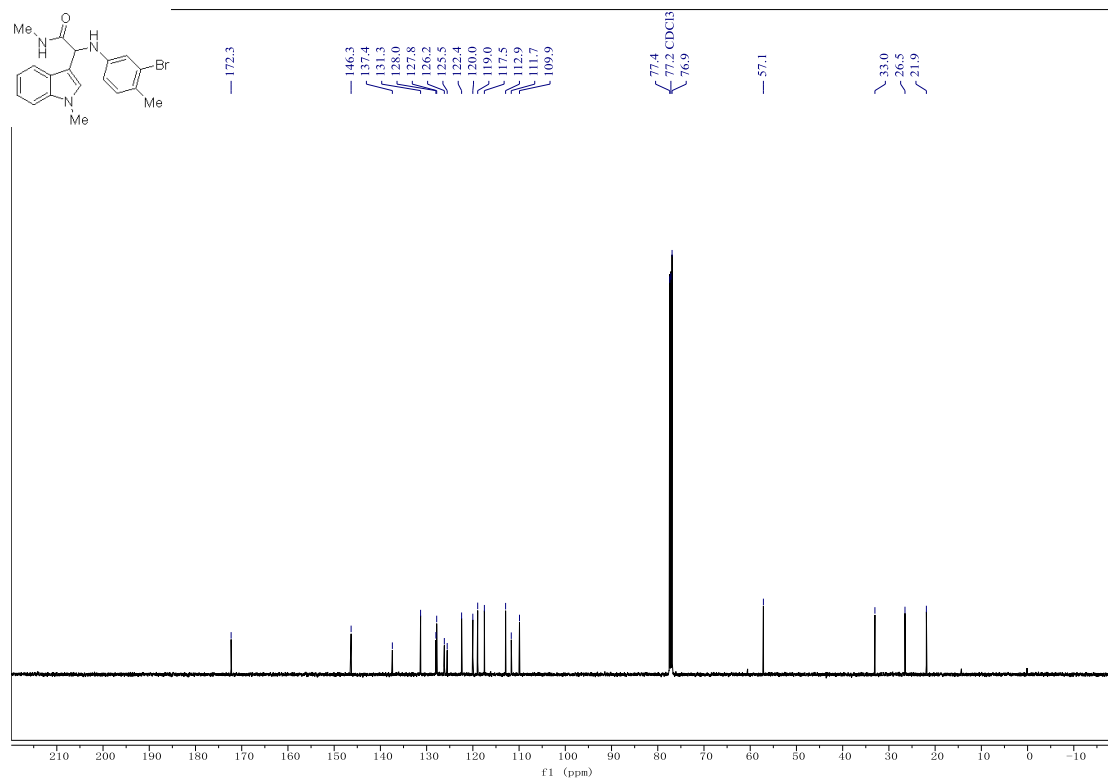

**2-((3-fluoro-5-methylphenyl)amino)-N-methyl-2-(1-methyl-1H-indol-3-yl)acetamide (3ac)**

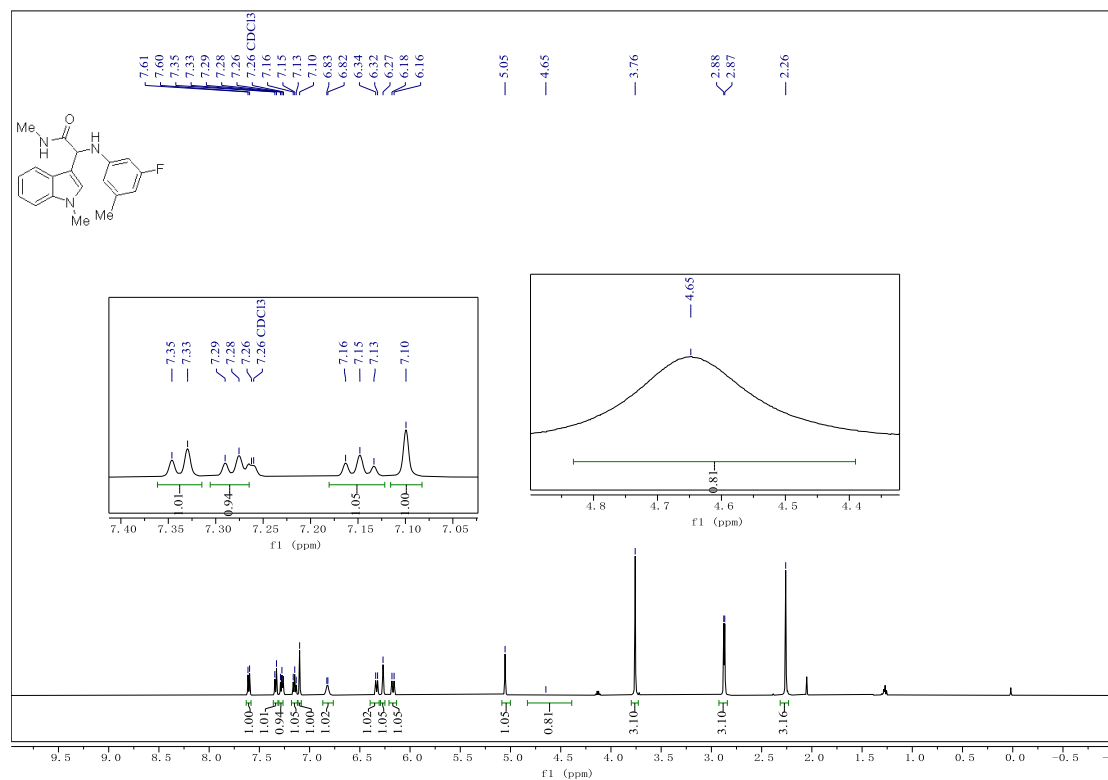

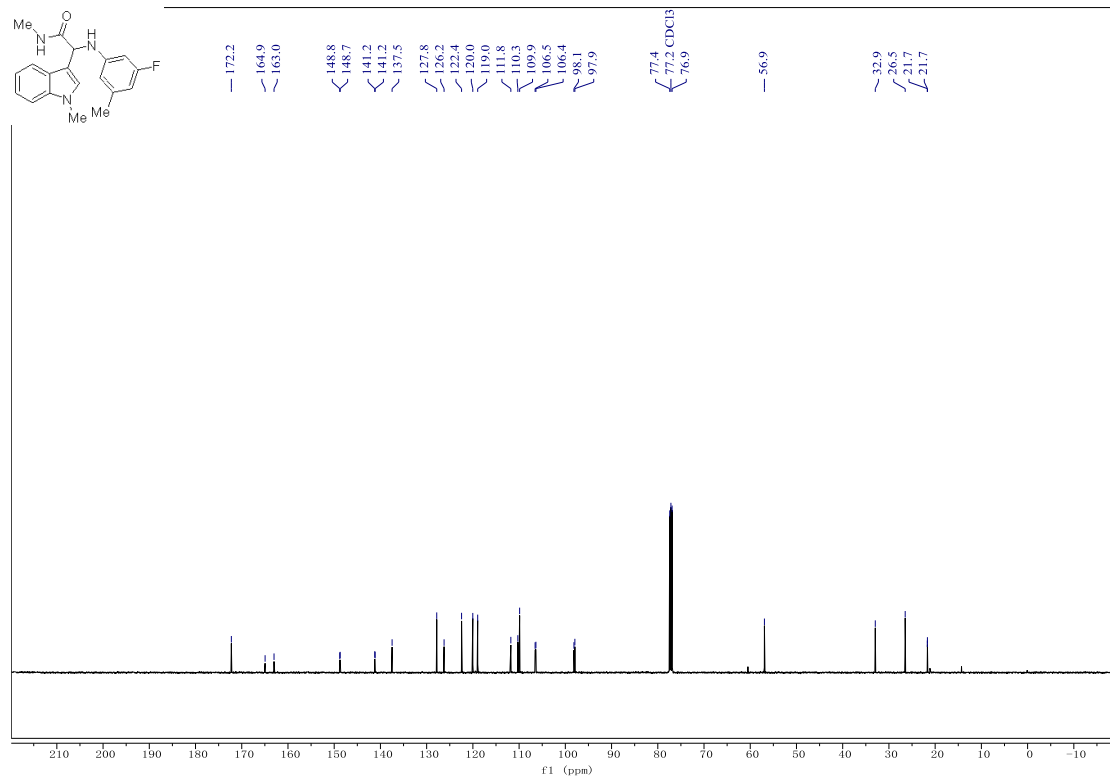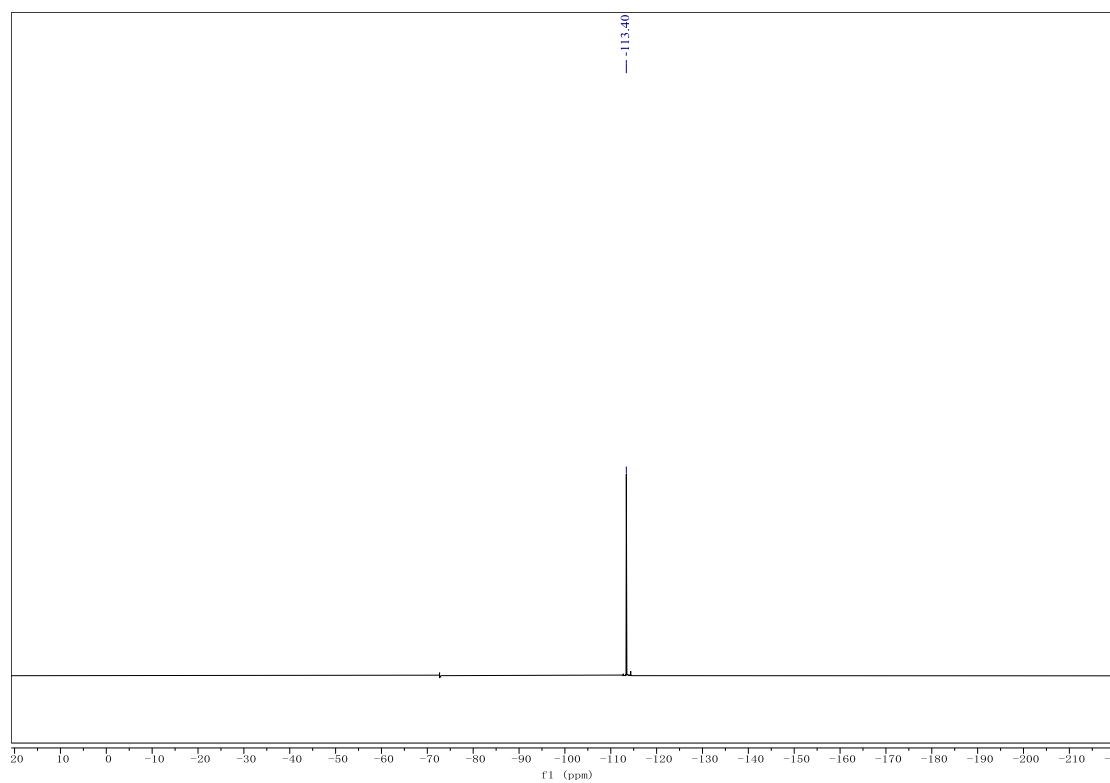

***N*-methyl-2-(1-methyl-1*H*-indol-3-yl)-2-((3,4,5-trimethoxyphenyl)amino)acetamide (3ad)**

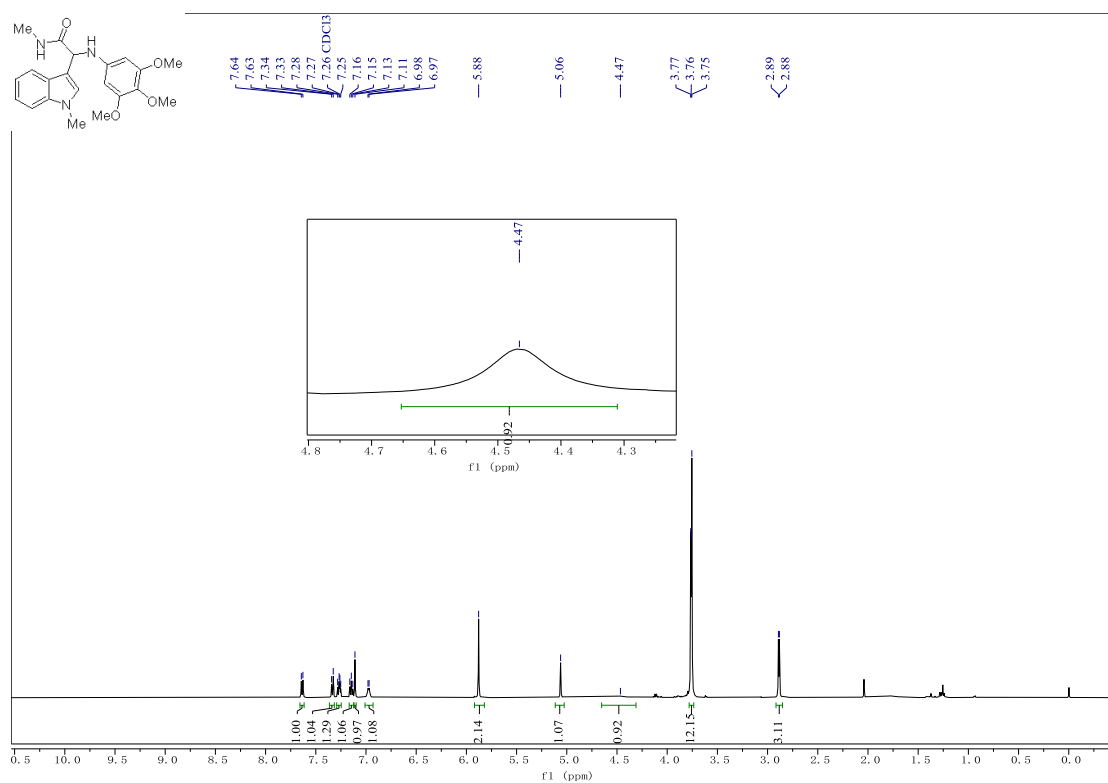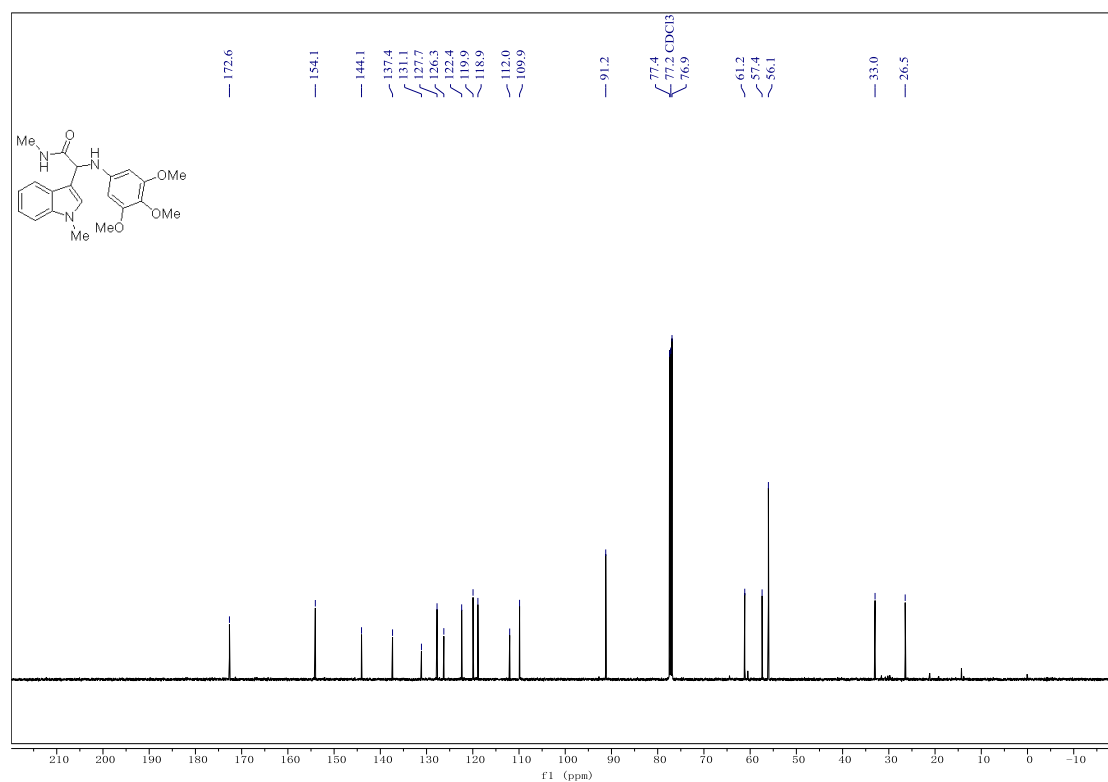

**2-((2,4-dimethylphenyl)amino)-*N*-methyl-2-(1-methyl-1*H*-indol-3-yl)acetamide (3ae)**

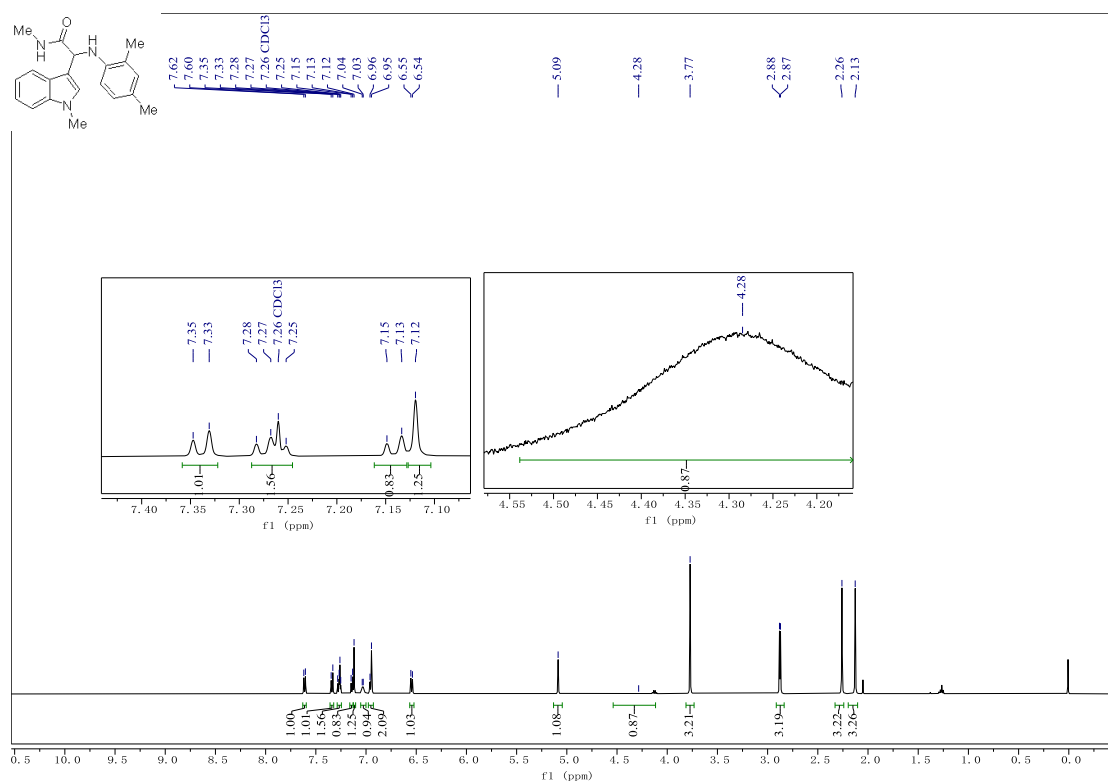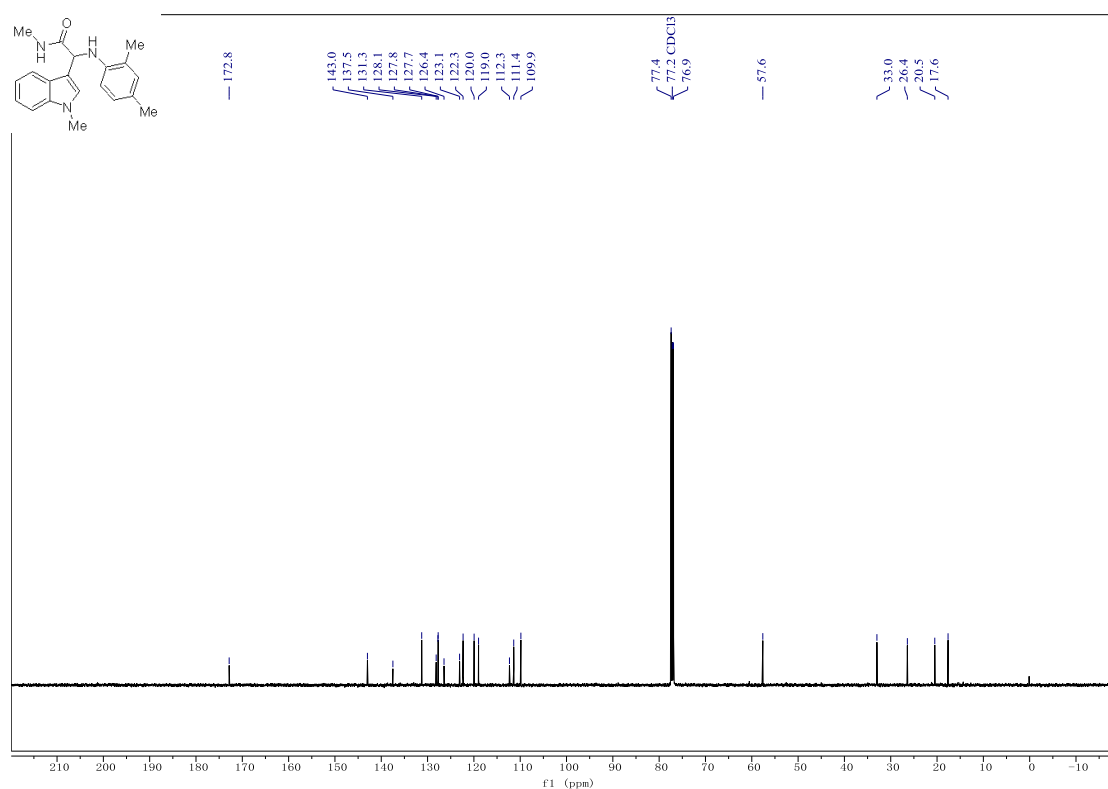

***N*-methyl-2-(methyl(phenyl)amino)-2-(1-methyl-1*H*-indol-3-yl)acetamide (3af)**

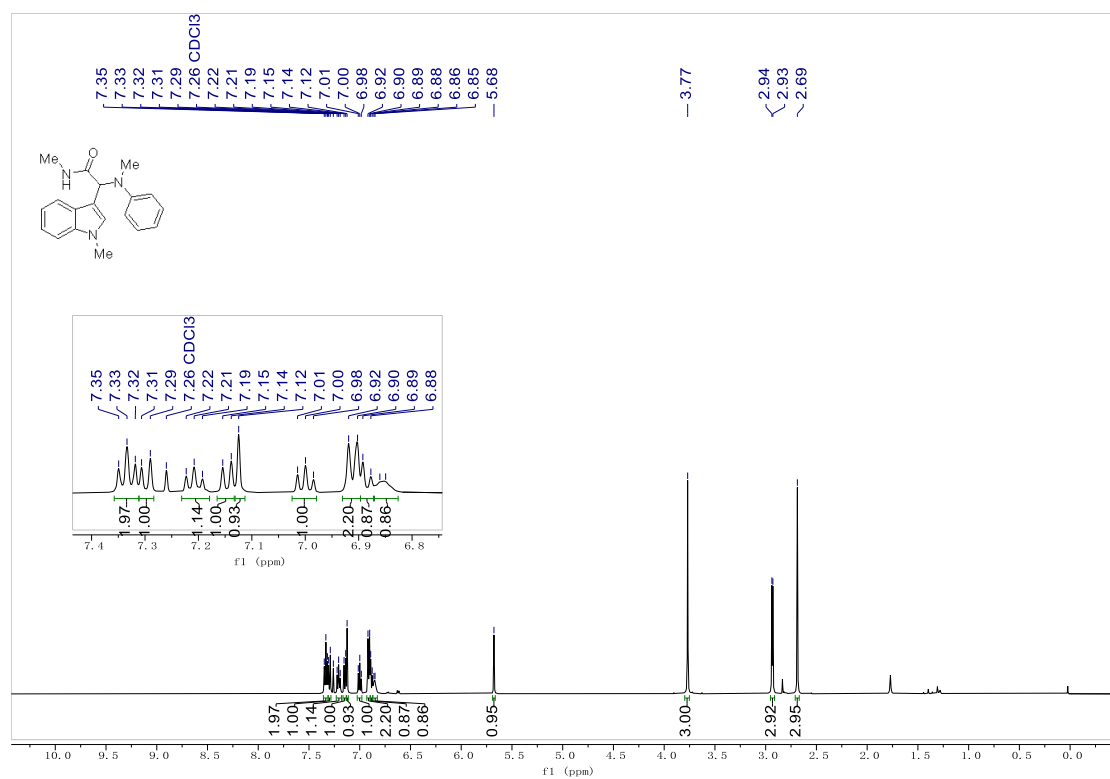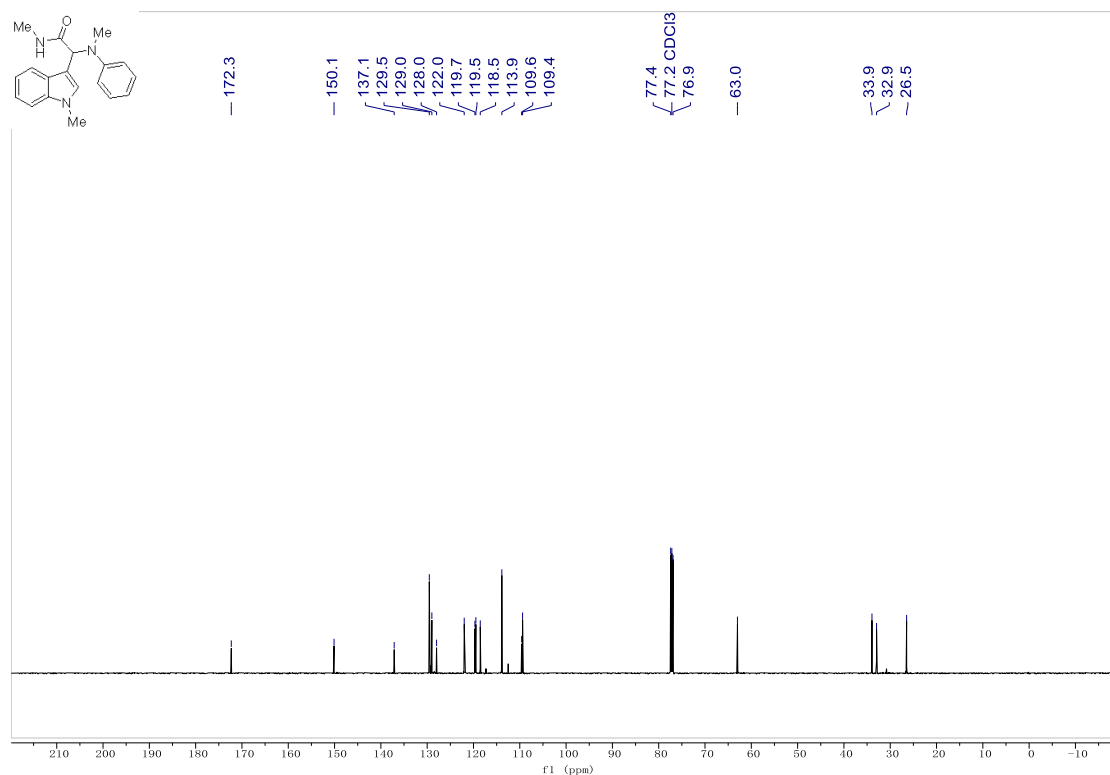



**2-(indolin-1-yl)-N-methyl-2-(1-methyl-1H-indol-3-yl)acetamide (3ag)**

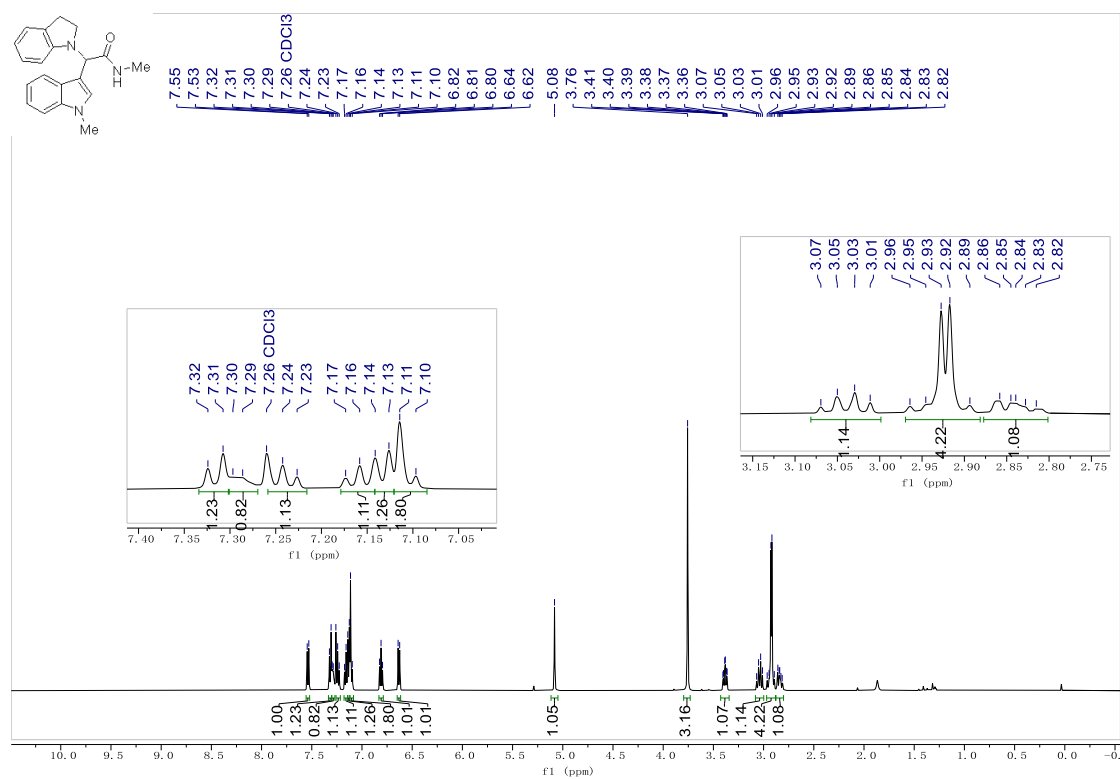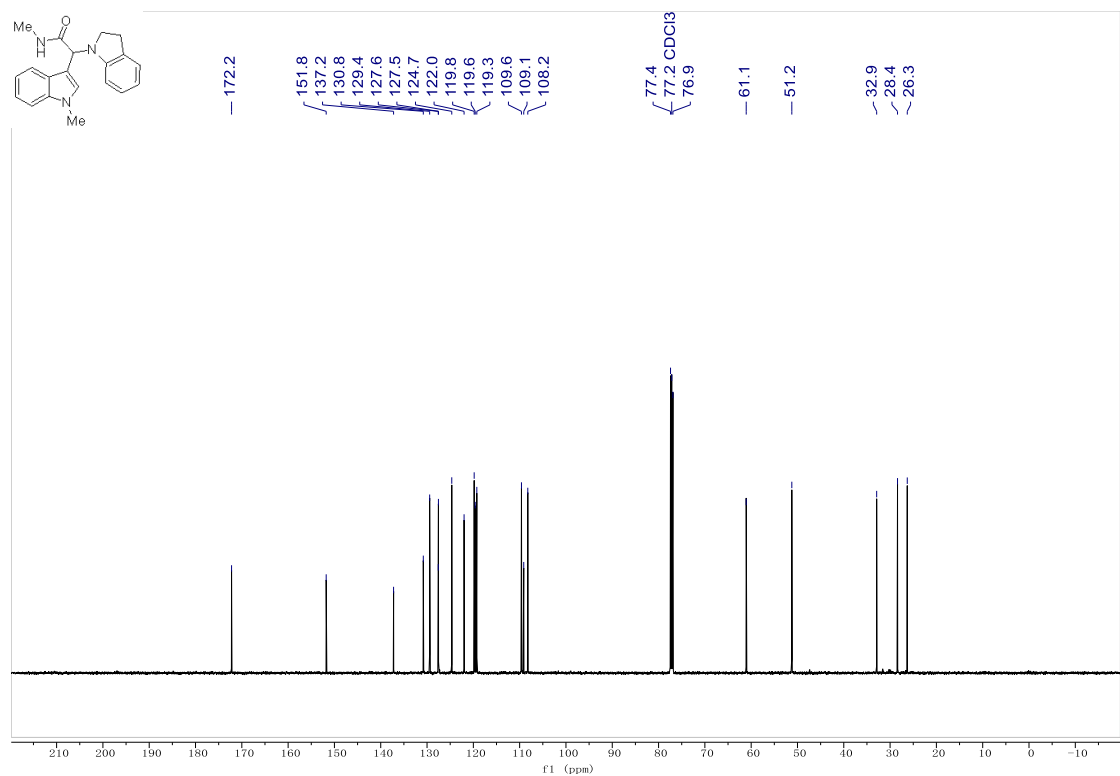

***N*-methyl-2-(1-methyl-1*H*-indol-3-yl)-2-(naphthalen-1-ylamino)acetamide (3ah)**

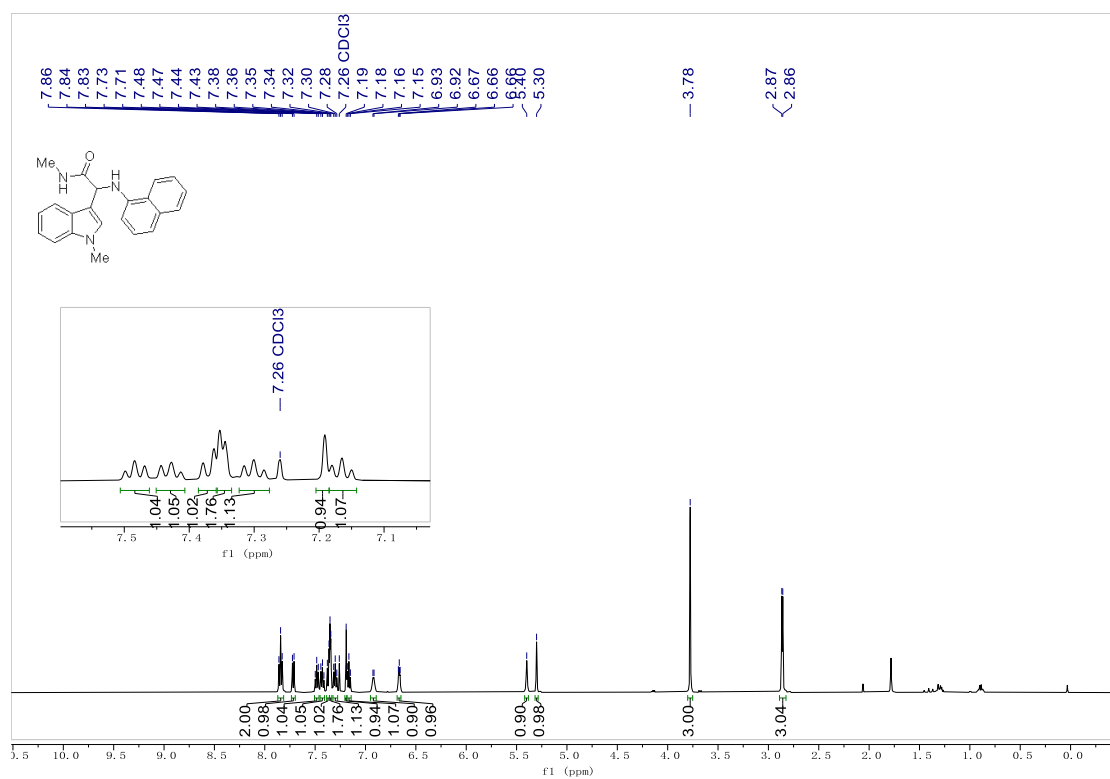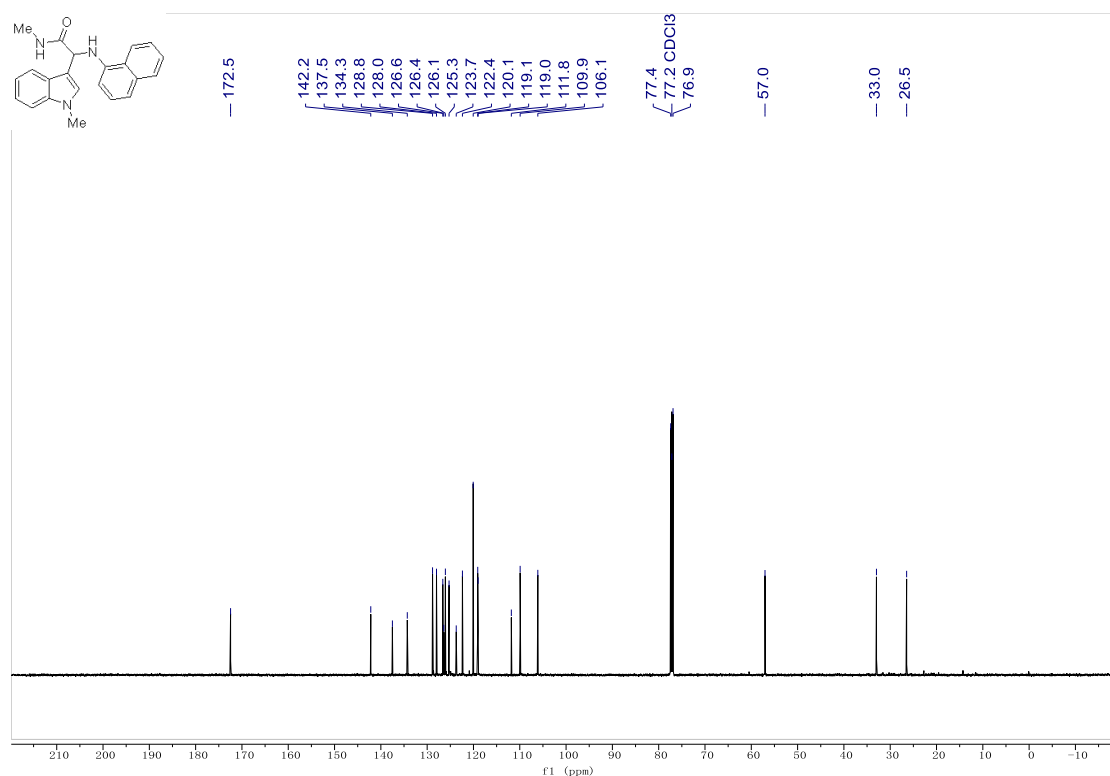

***N*-methyl-2-(1-methyl-1*H*-indol-3-yl)-2-(quinolin-8-ylamino)acetamide (3ai)**

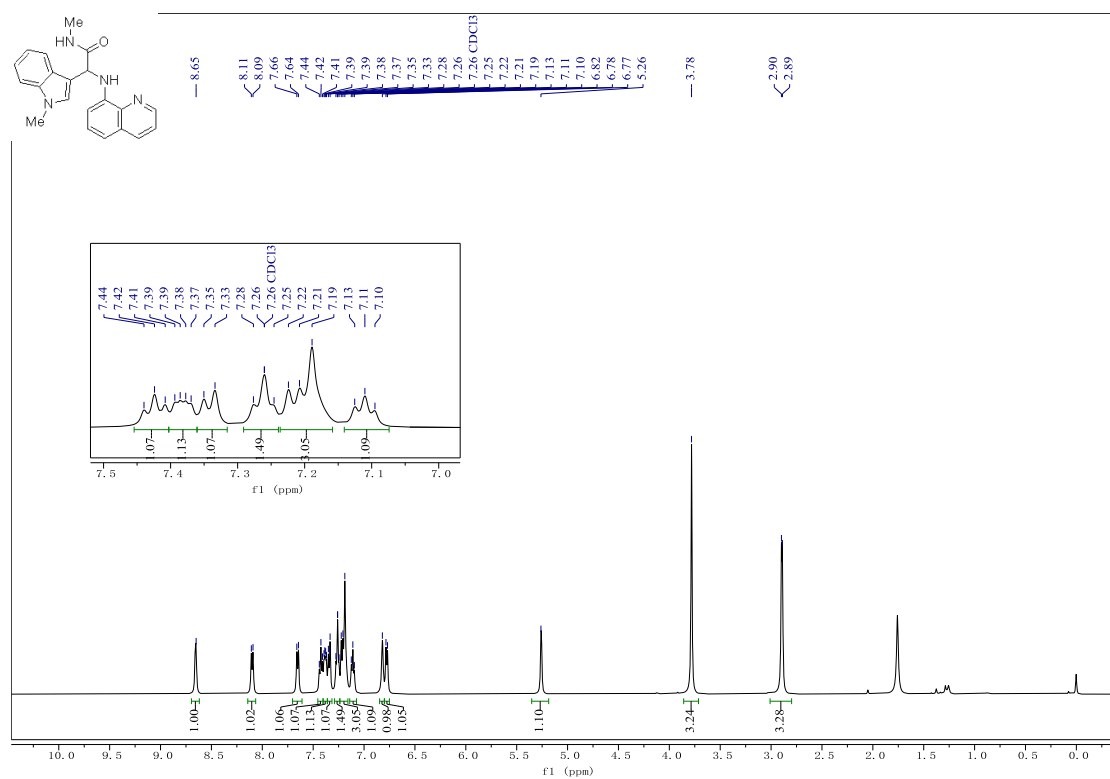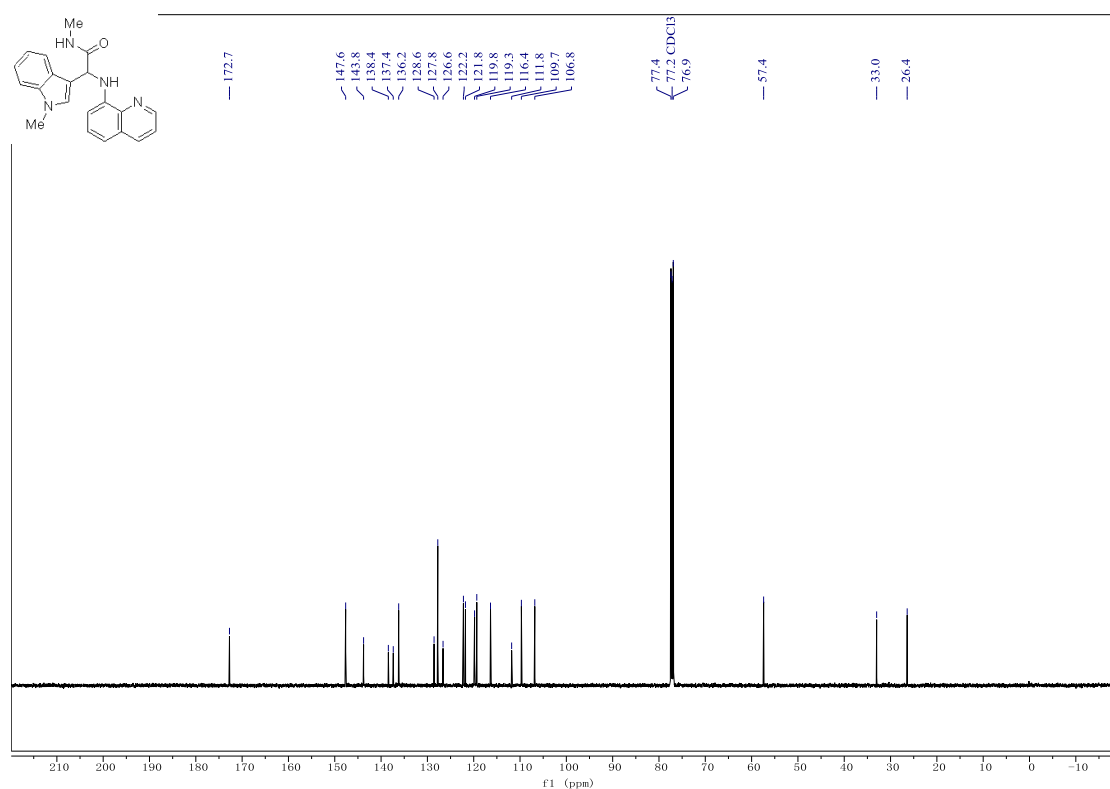

***N*-methyl-2-(1-methyl-1*H*-indol-3-yl)-2-(1*H*-pyrazol-1-yl)acetamide (3aj)**

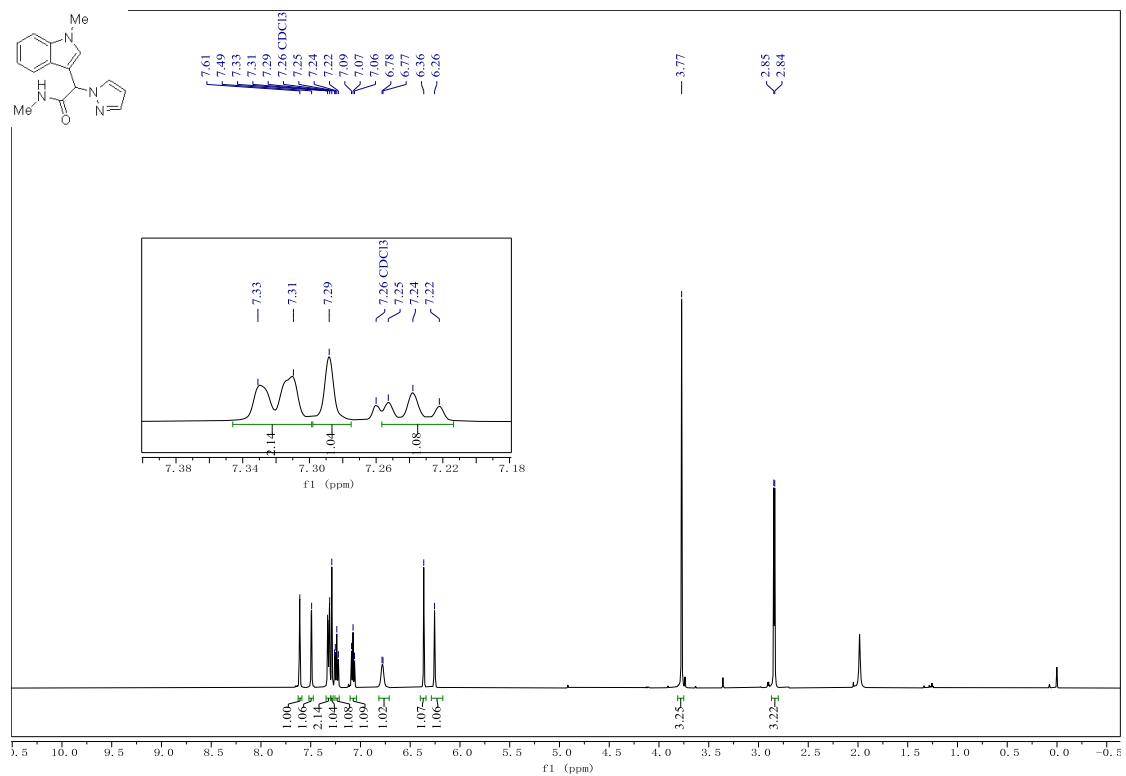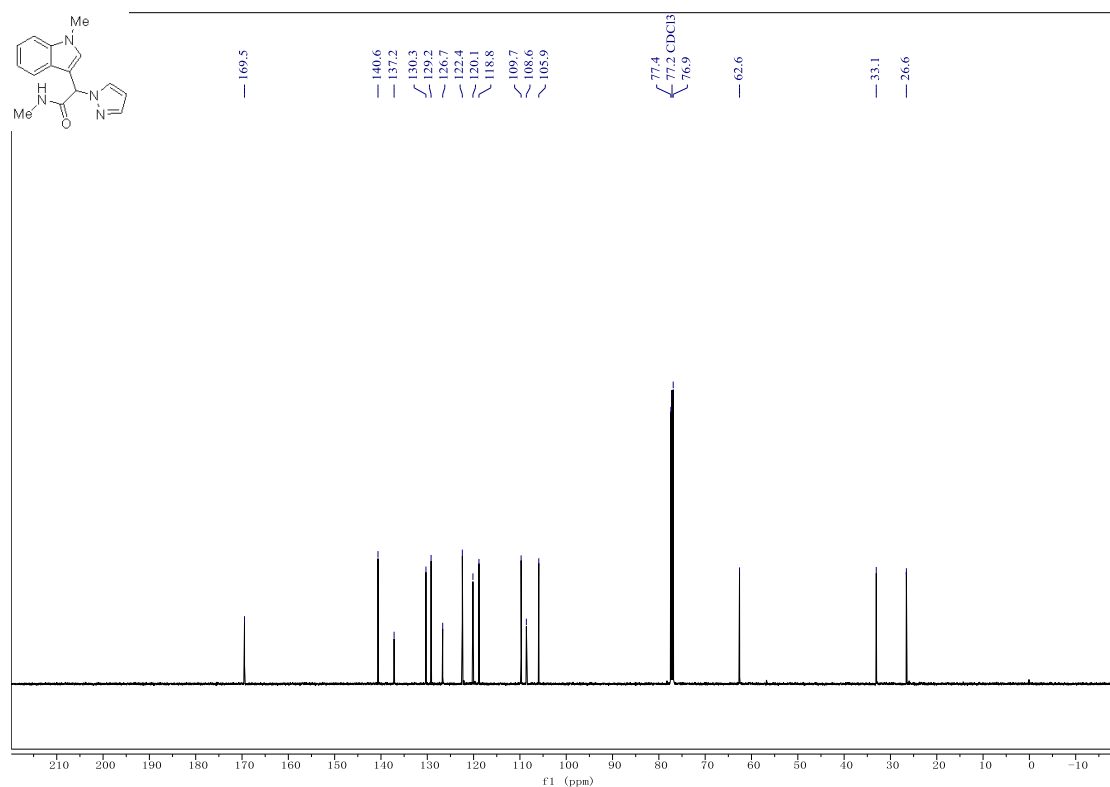

**2-(benzo[d]thiazol-2-ylamino)-*N*-methyl-2-(1-methyl-1*H*-indol-3-yl)acetamide (3ak)**

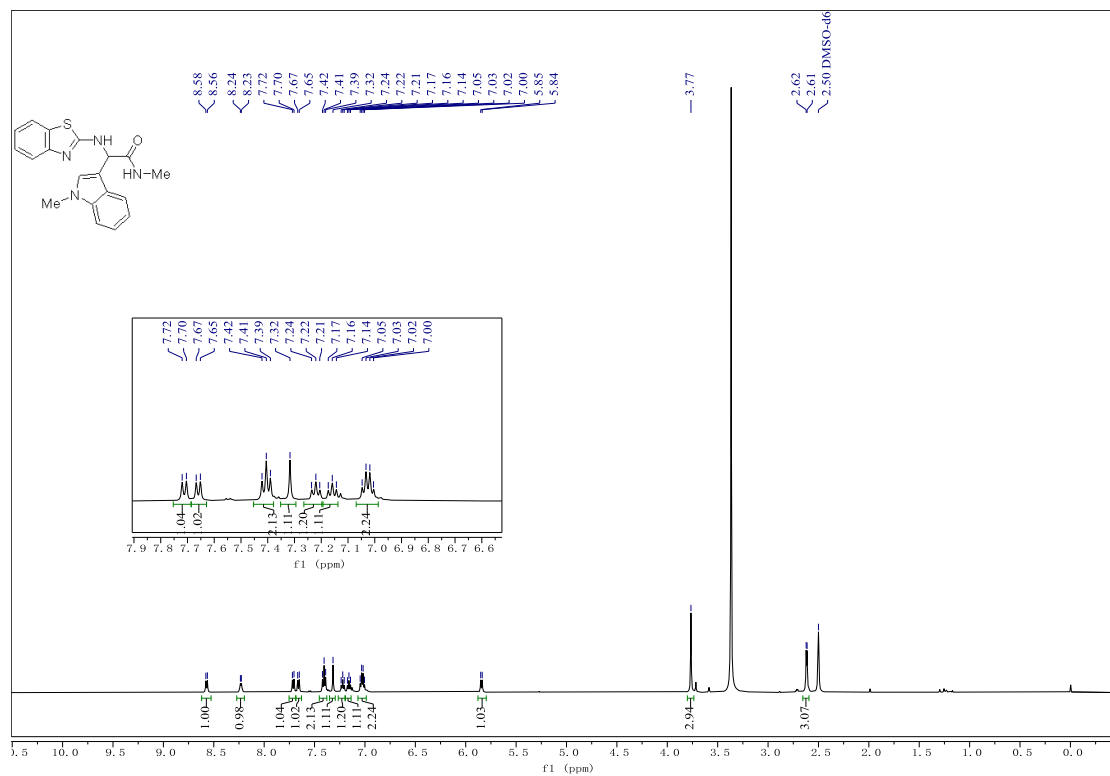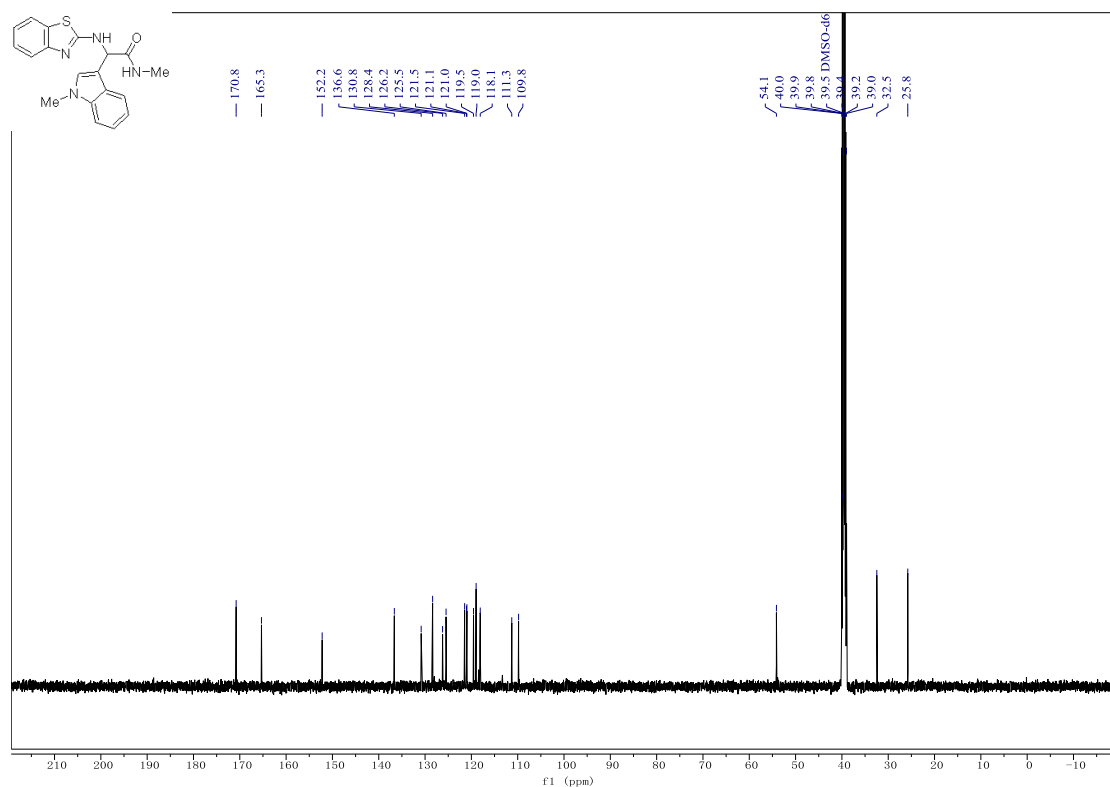

**2-(cyclopropylamino)-*N*-methyl-2-(1-methyl-1*H*-indol-3-yl)acetamide (3aI)**

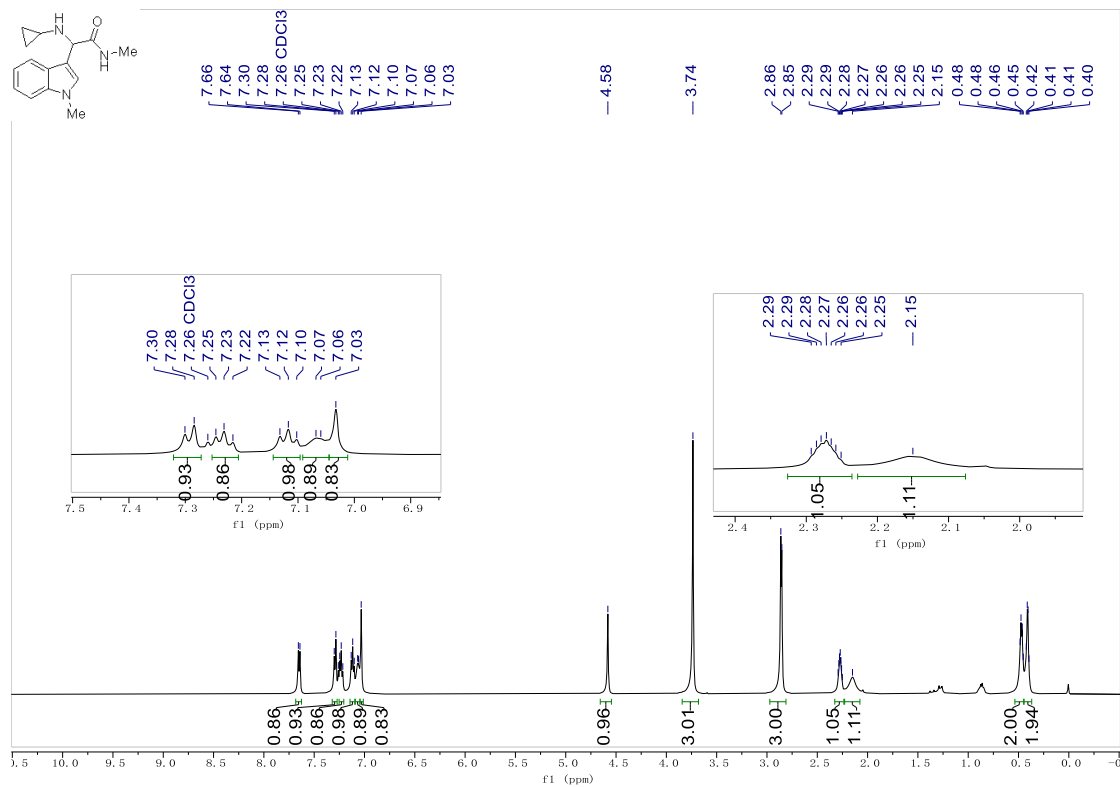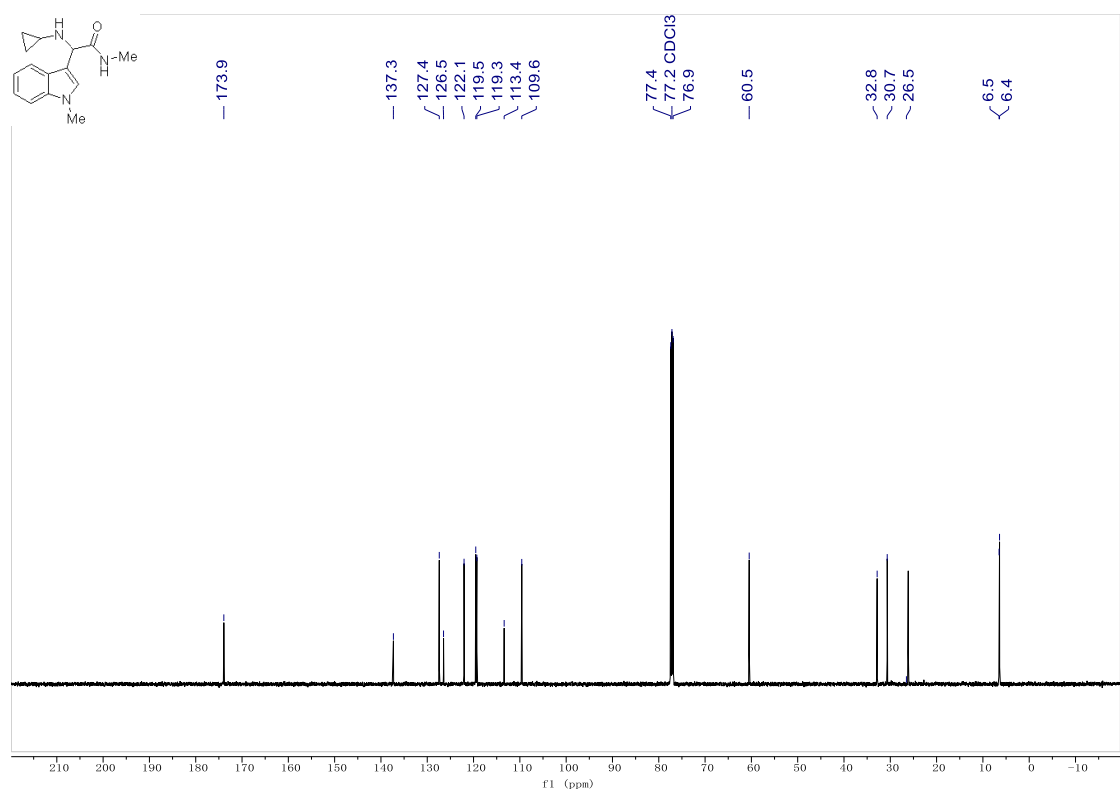

**2-(butylamino)-N-methyl-2-(1-methyl-1H-indol-3-yl)acetamide (3am)**

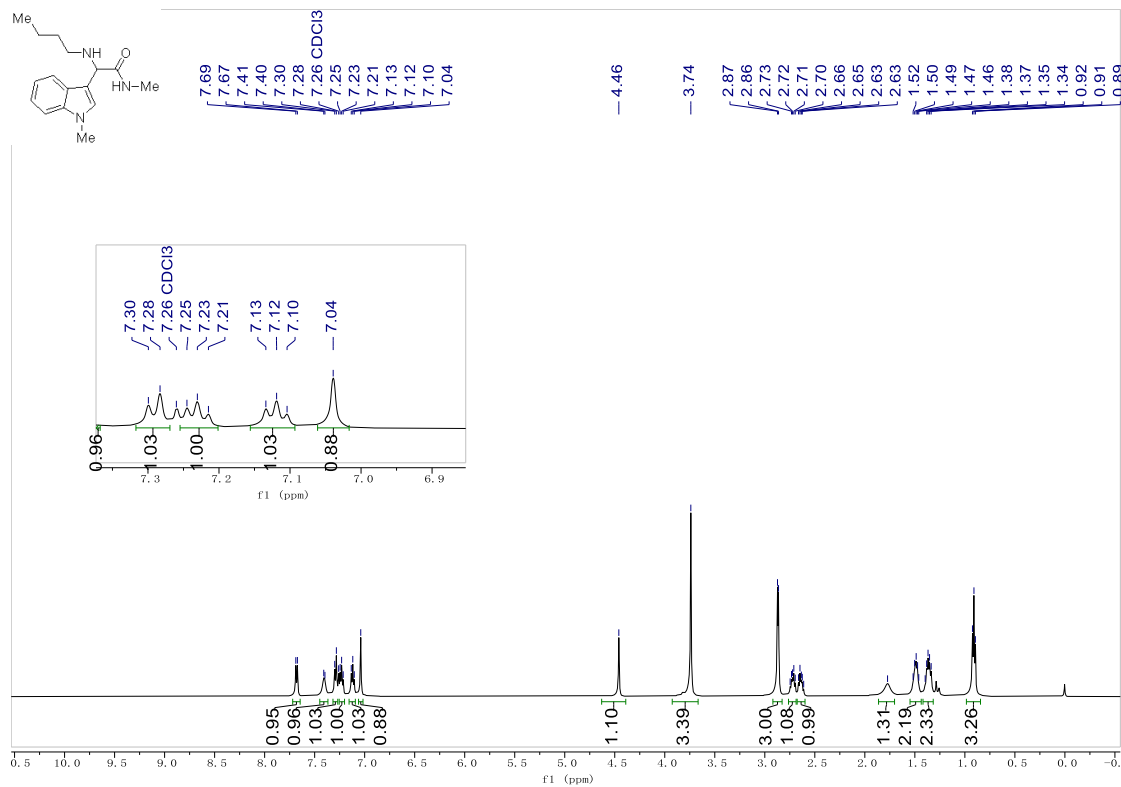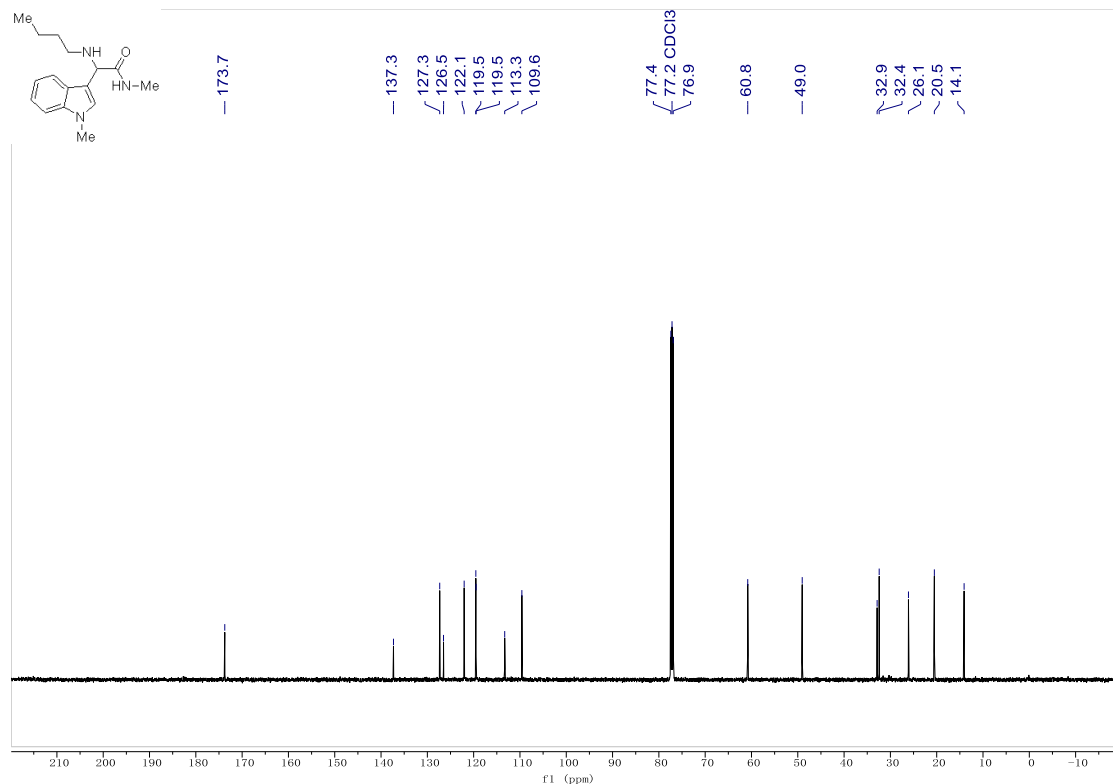

**2-(cyclohexyl(methyl)amino)-*N*-methyl-2-(1-methyl-1*H*-indol-3-yl)acetamide (3an)**

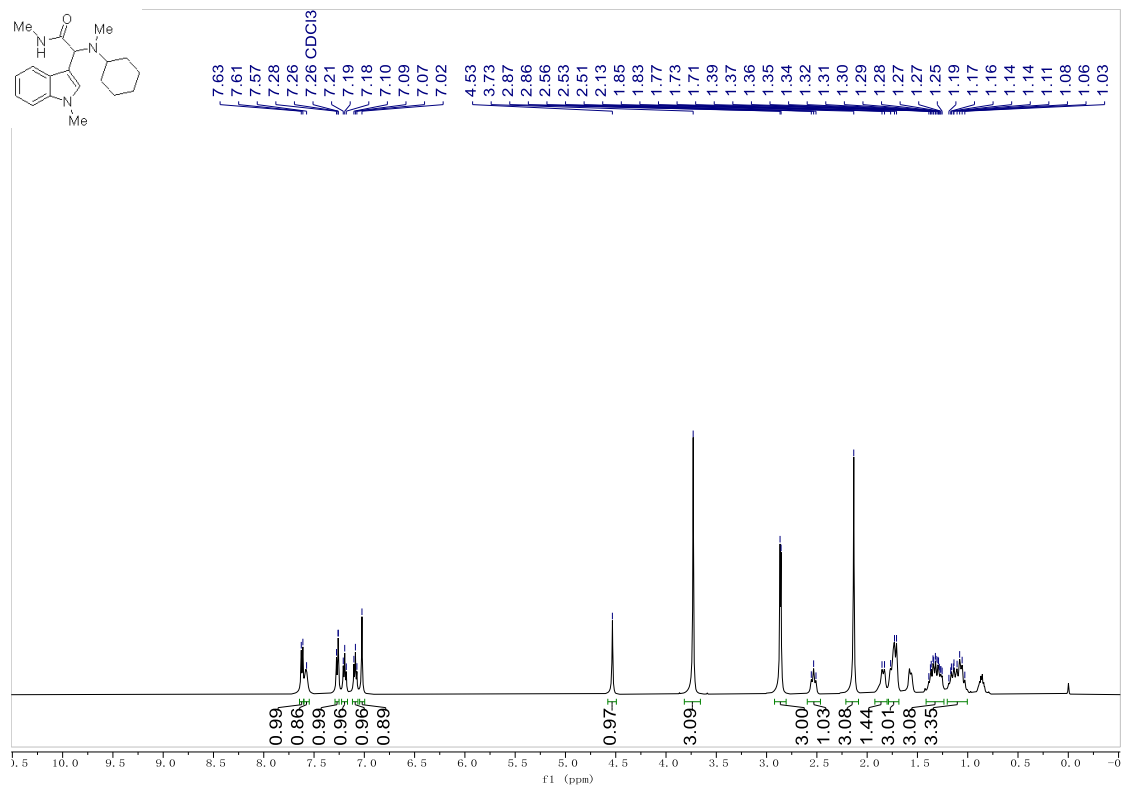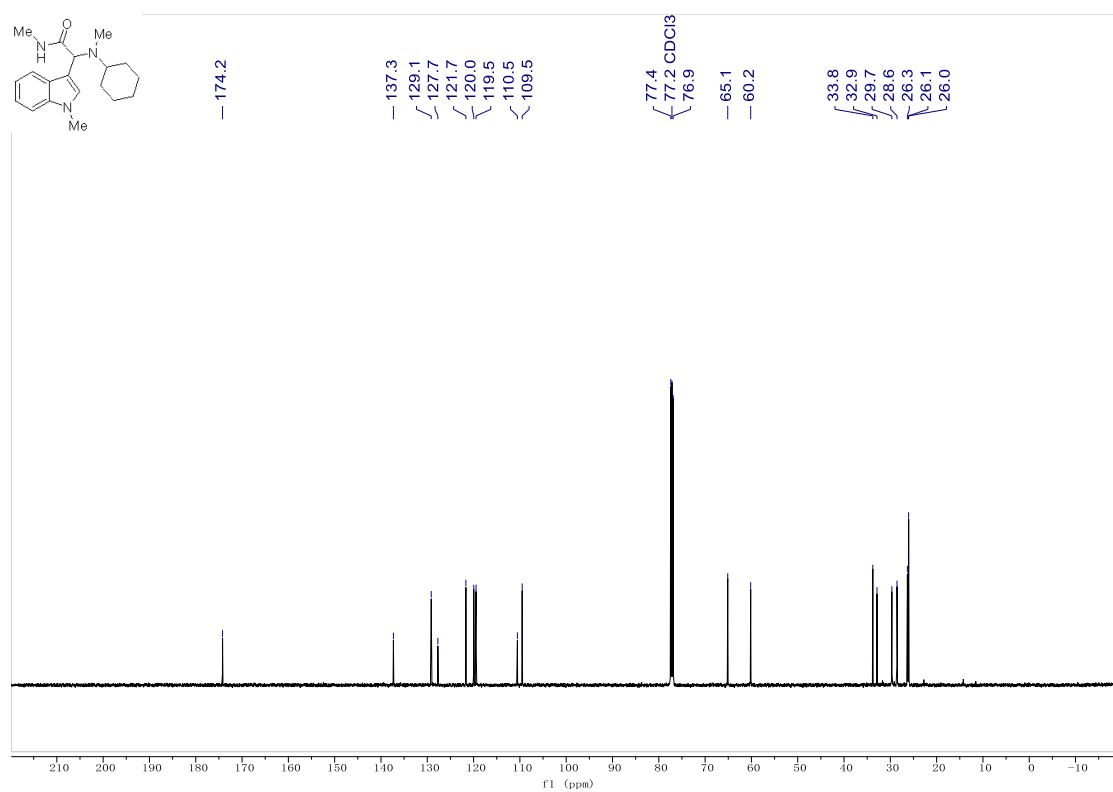



### *N*-methyl-2-(methyl(propyl)amino)-2-(1-methyl-1*H*-indol-3-yl)acetamide (3ao)

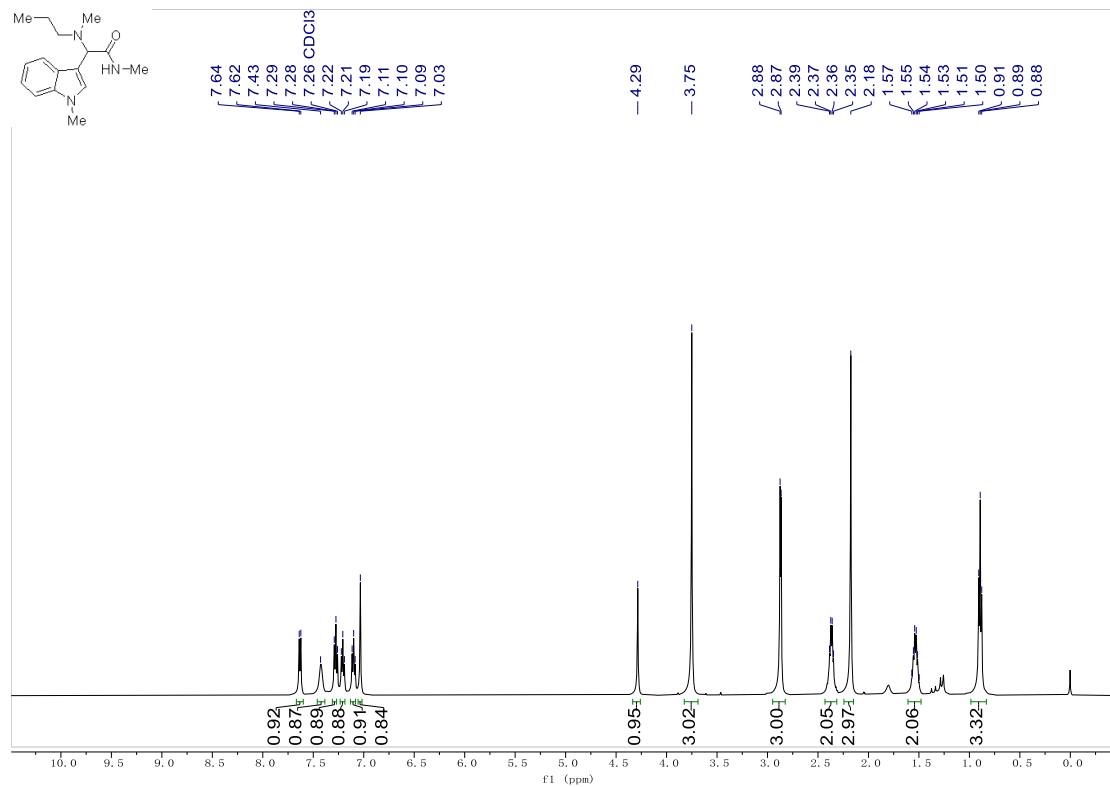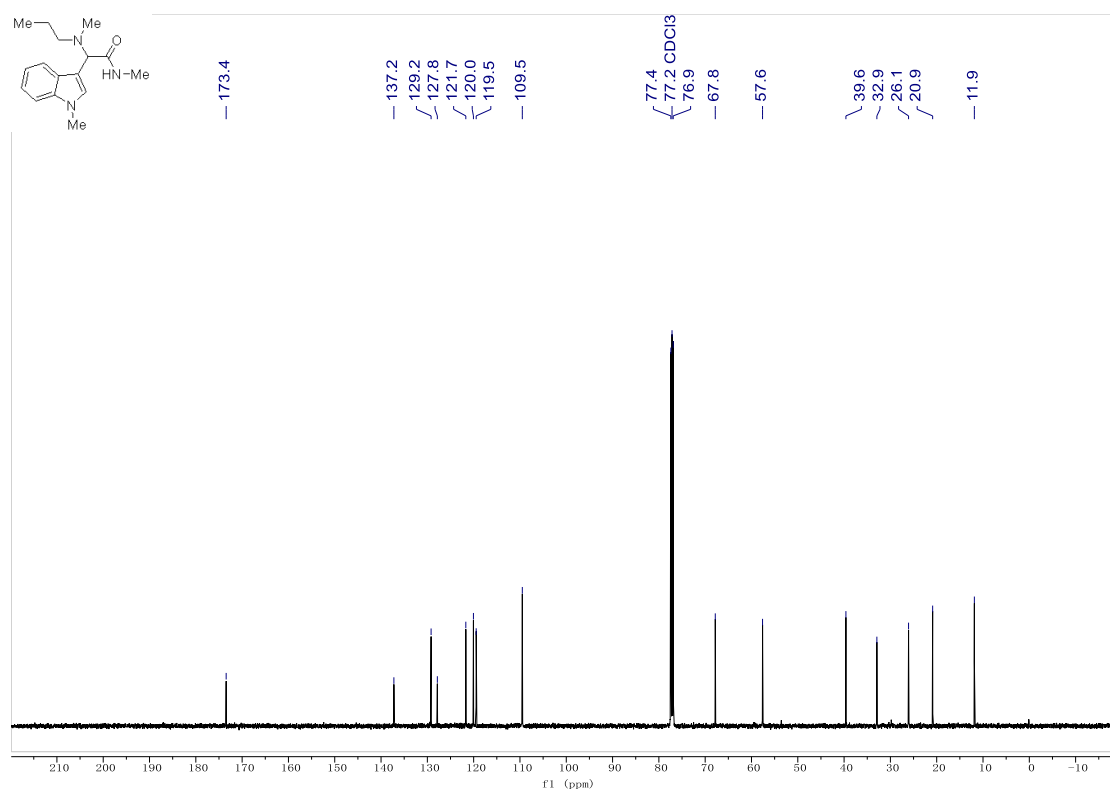

**2-(benzyl(methyl)amino)-*N*-methyl-2-(1-methyl-1*H*-indol-3-yl)acetamide (3ap)**

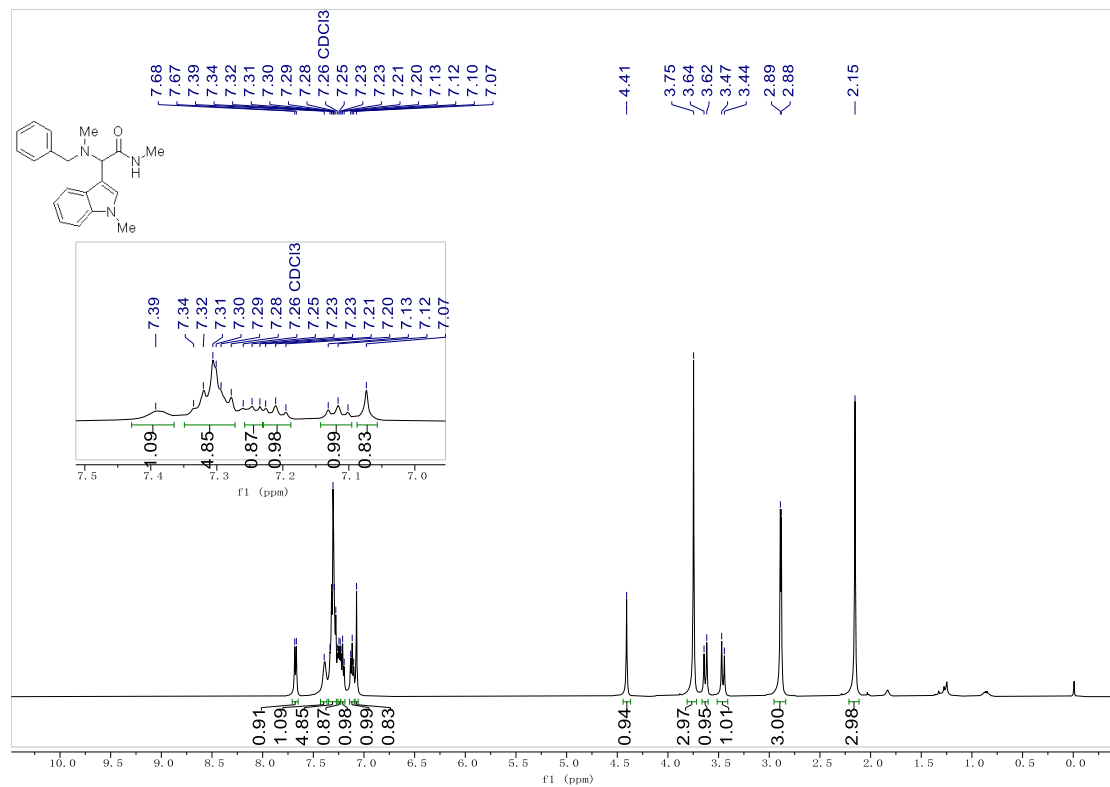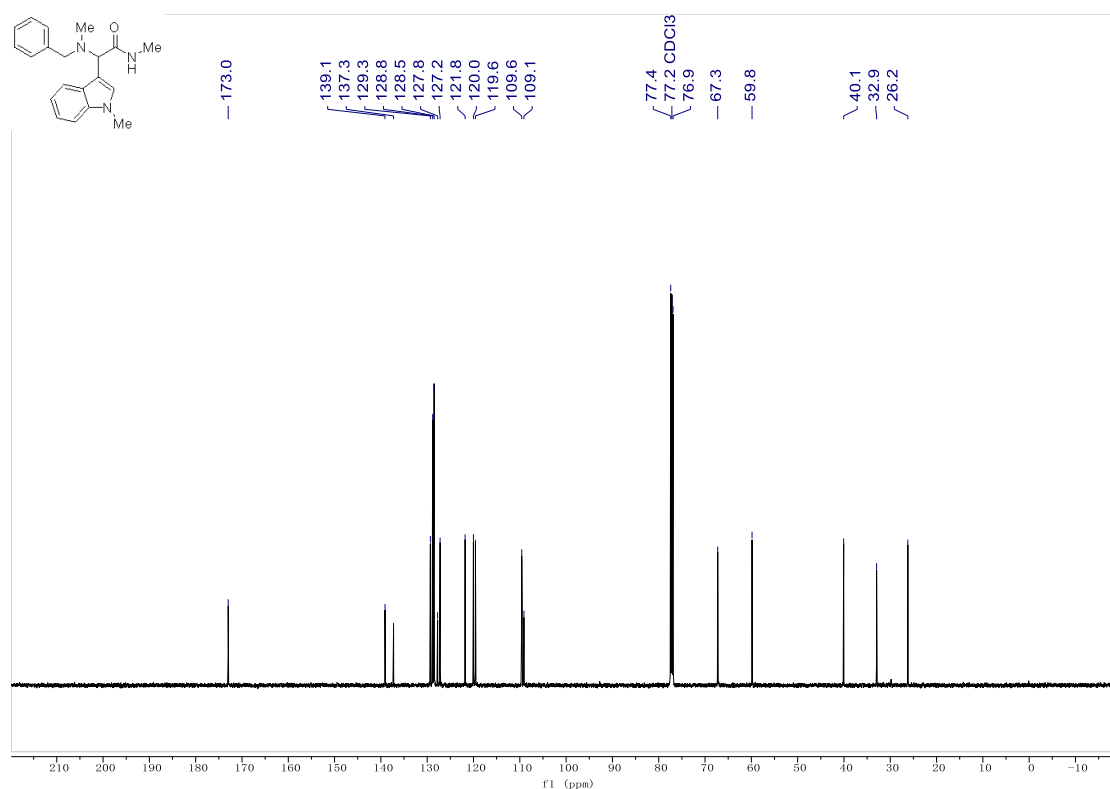

**2-((4-isopropylphenyl)amino)-2-(5-methoxy-1-methyl-1H-indol-3-yl)-N-methylacetamide (4a)**

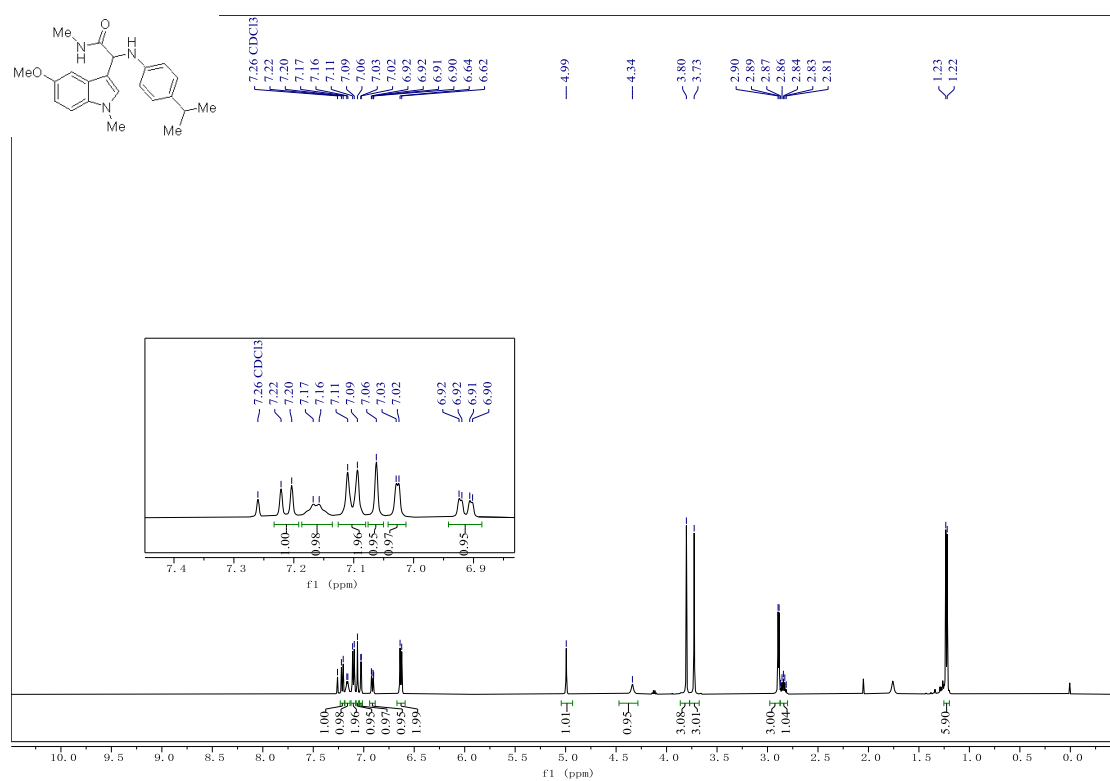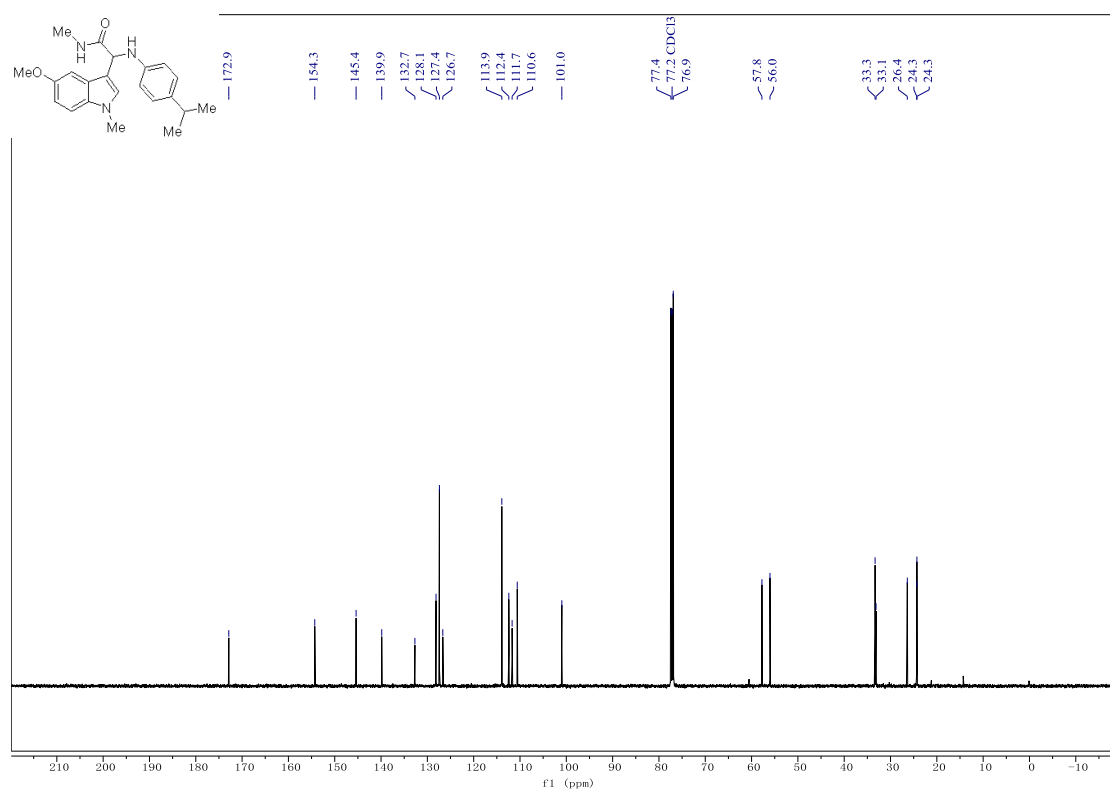

**2-(5-bromo-1-methyl-1*H*-indol-3-yl)-2-((4-isopropylphenyl)amino)-*N*-methylacetamide (4b)**

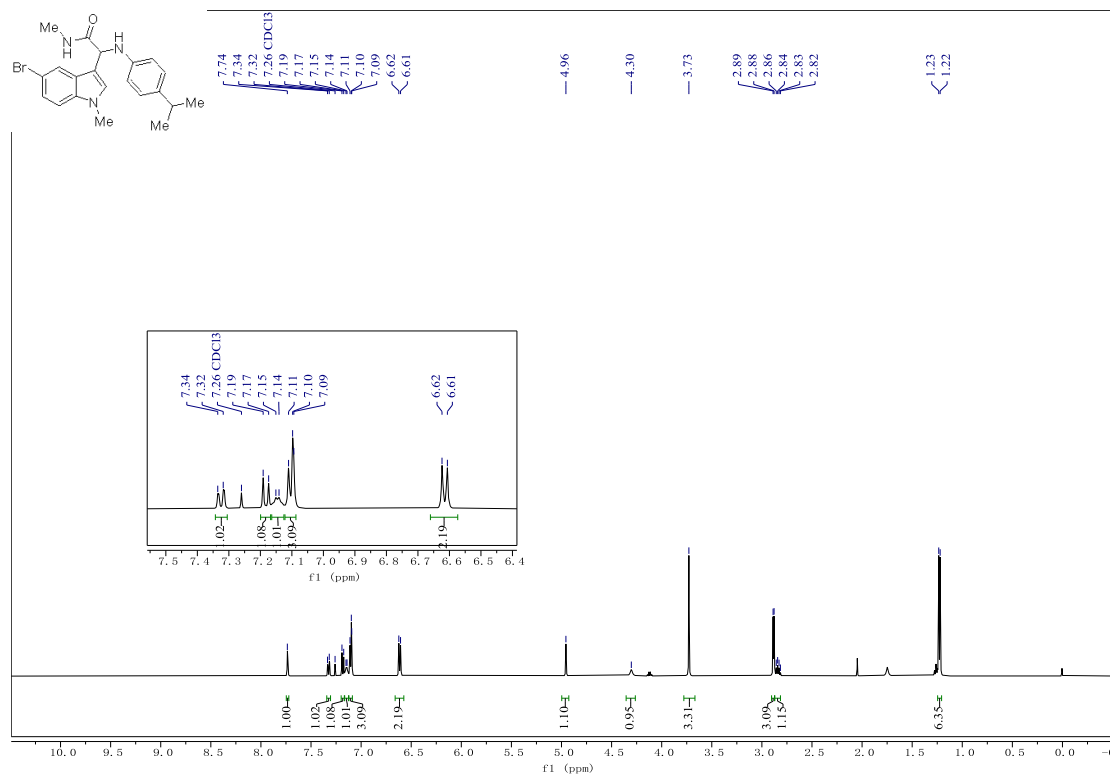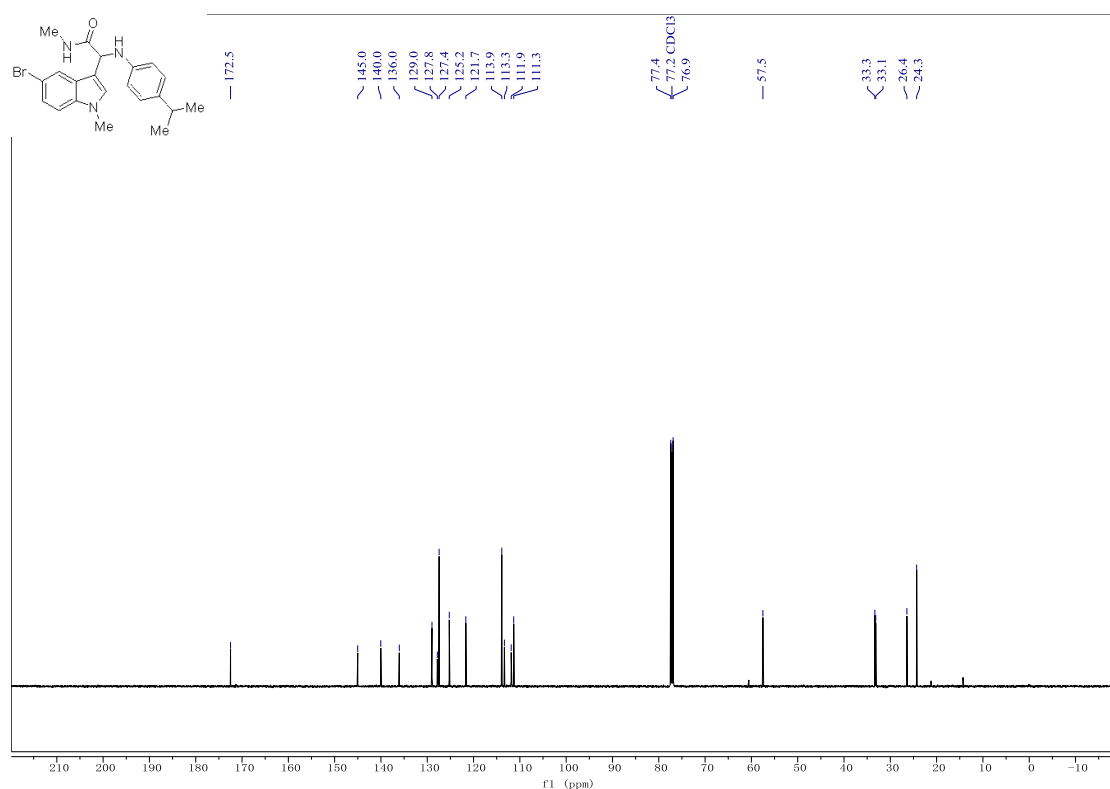

**2-(1,2-dimethyl-1*H*-indol-3-yl)-2-((4-isopropylphenyl)amino)-*N*-methylacetamide (4c)**

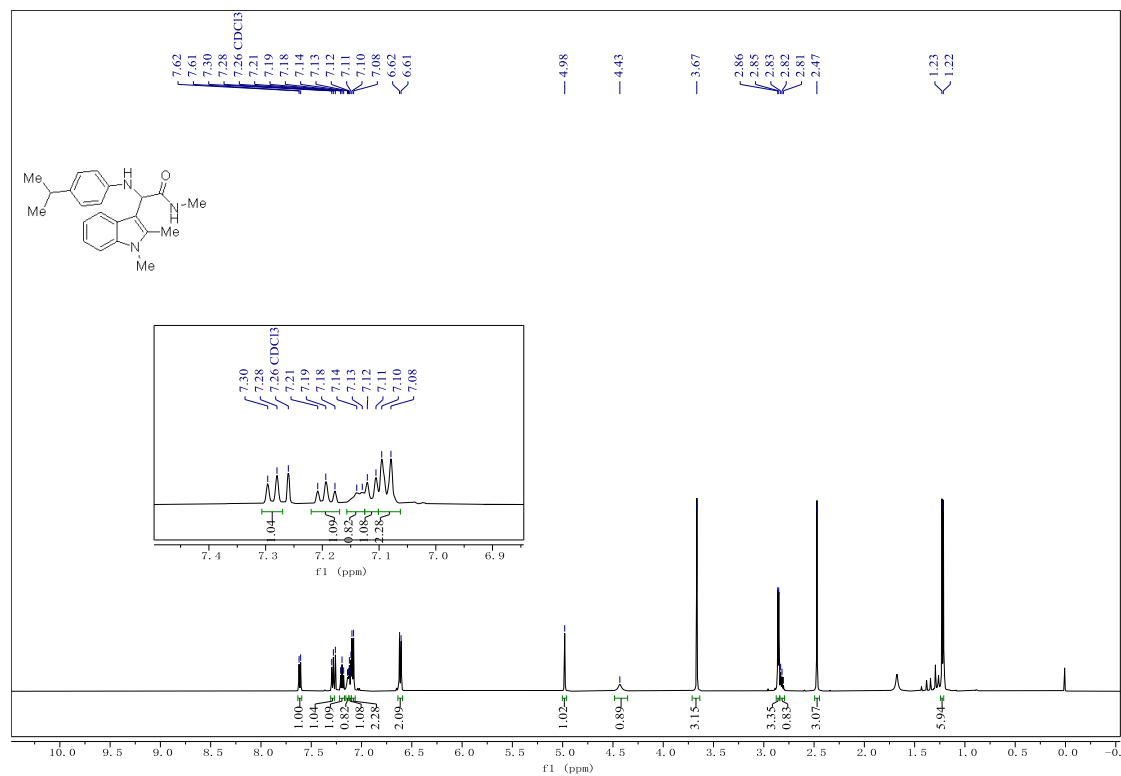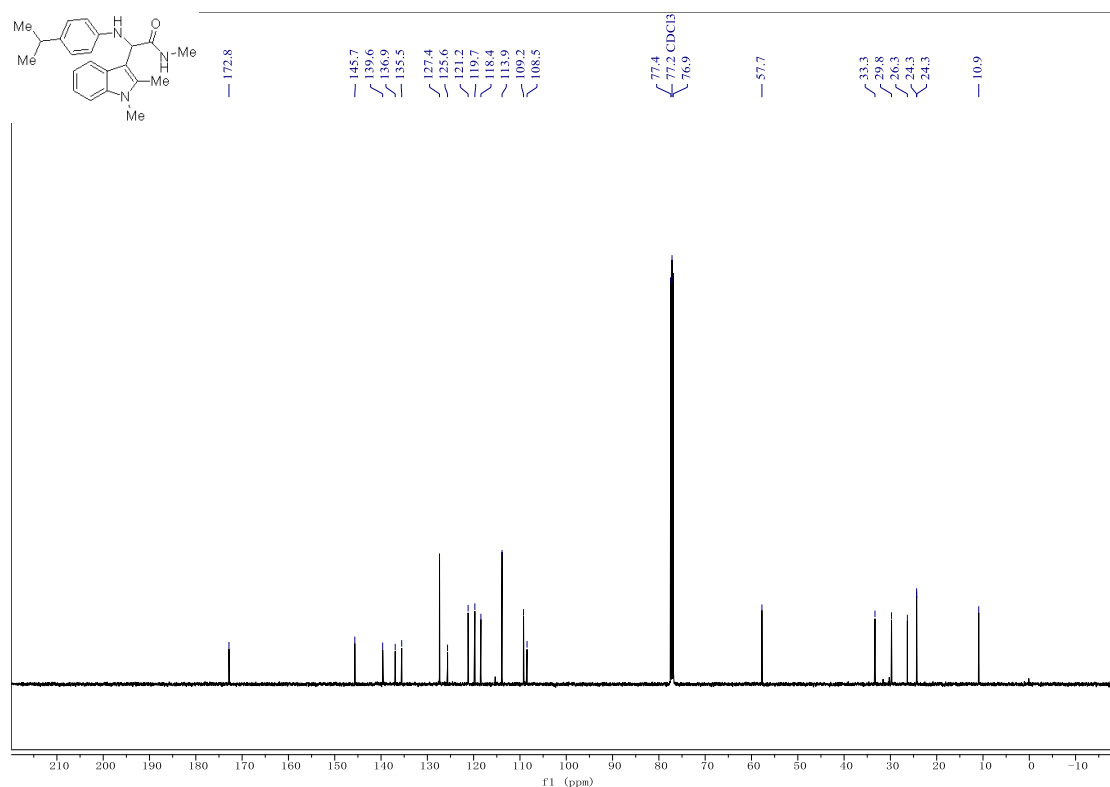

**2-(1-allyl-1H-indol-3-yl)-2-((4-isopropylphenyl)amino)-N-methylacetamide (4d)**

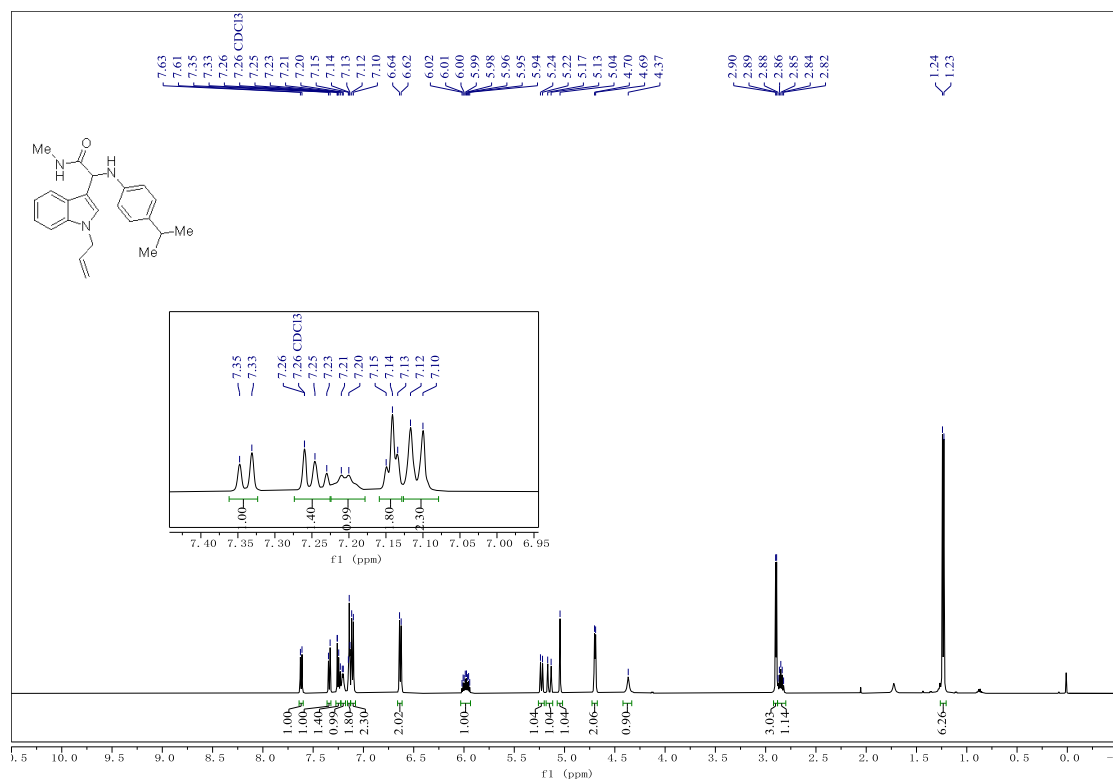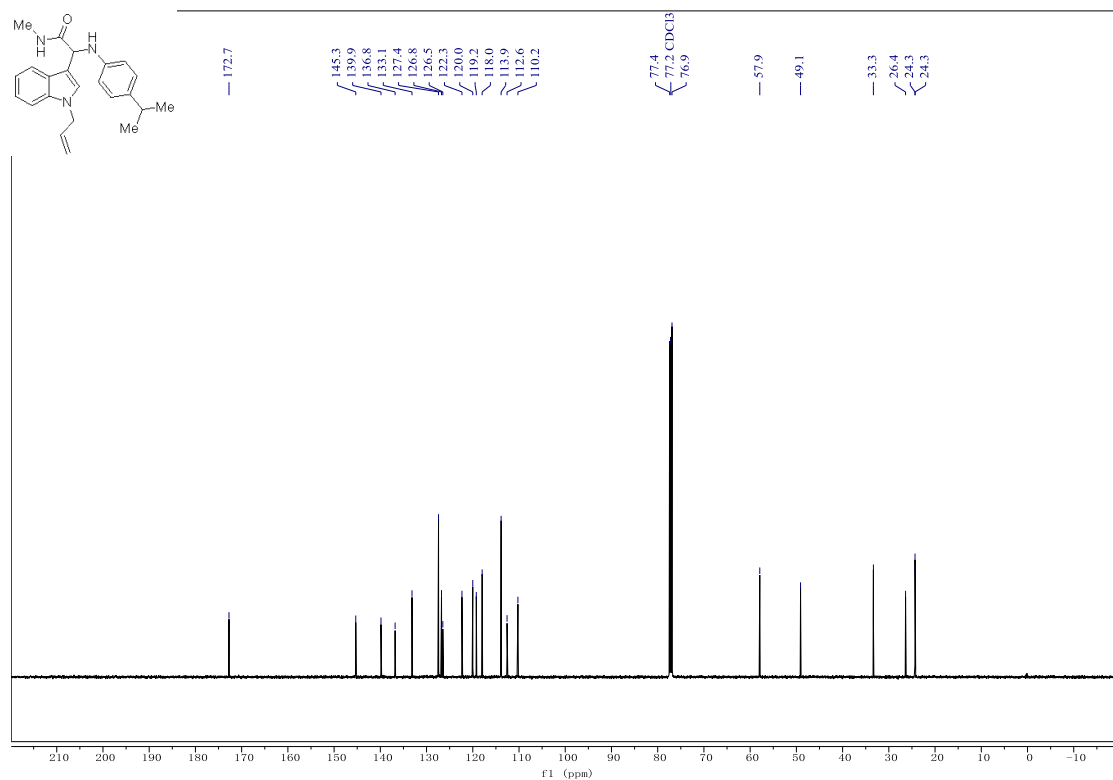

**2-(1-(2-fluorobenzyl)-1*H*-indol-3-yl)-2-((4-isopropylphenyl)amino)-*N*-methylacetamide (4e)**

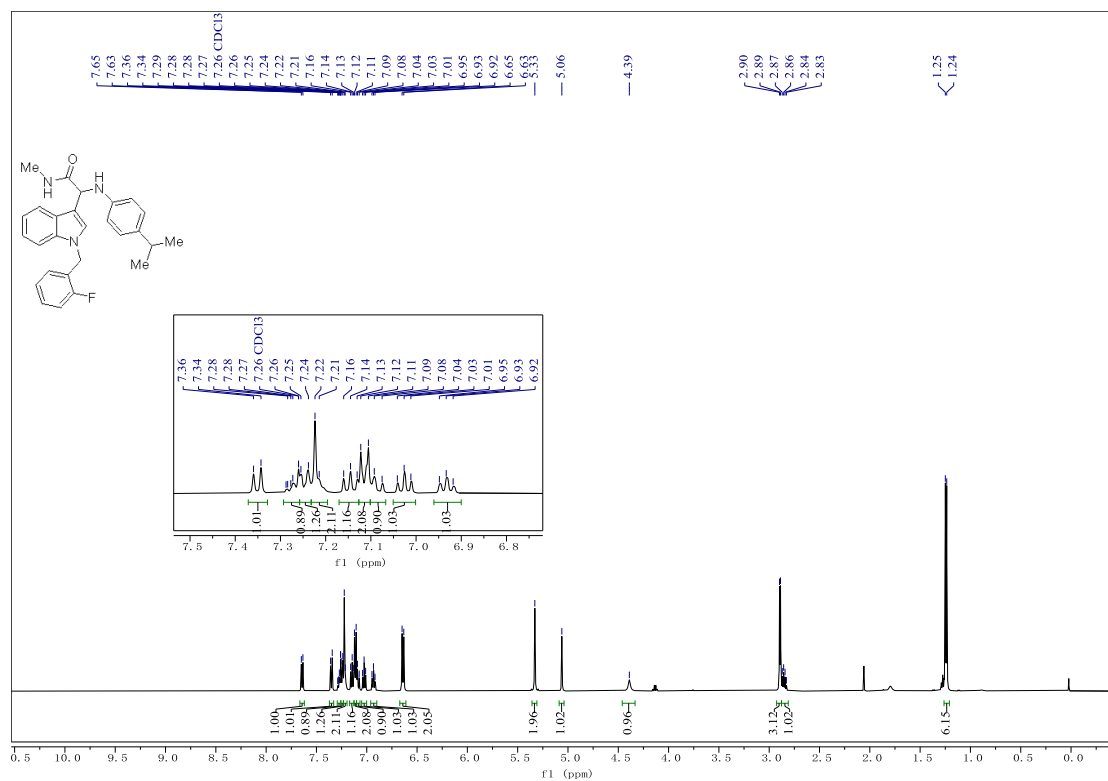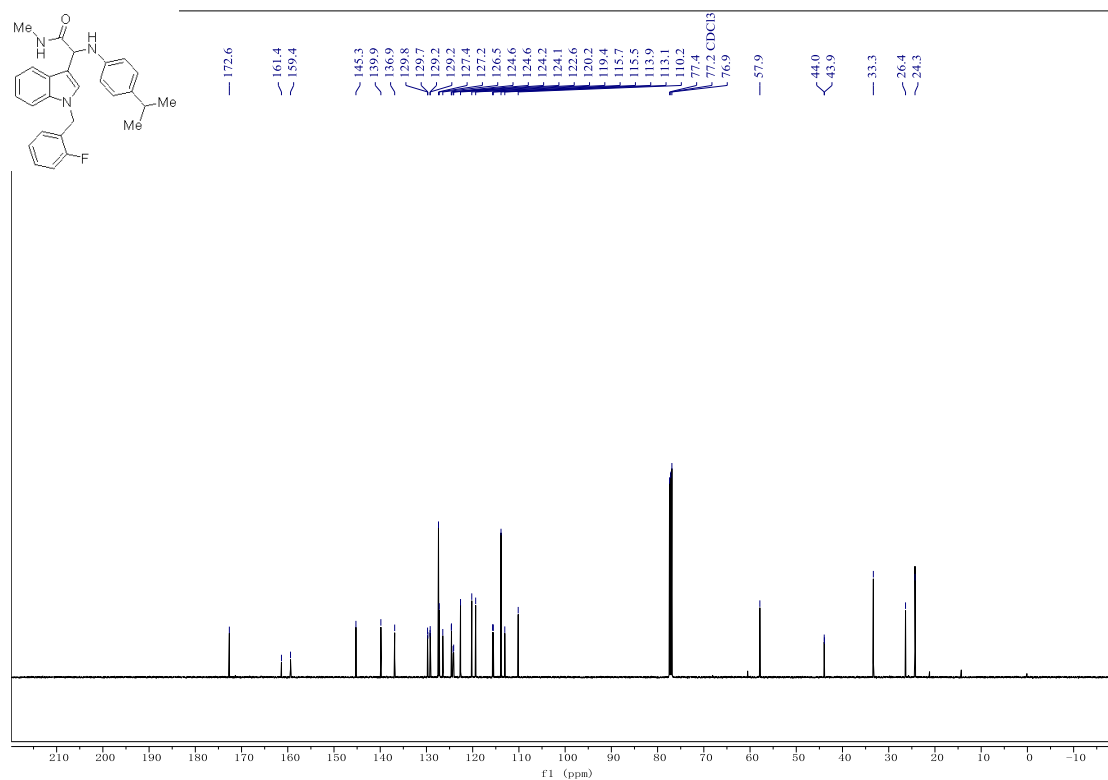

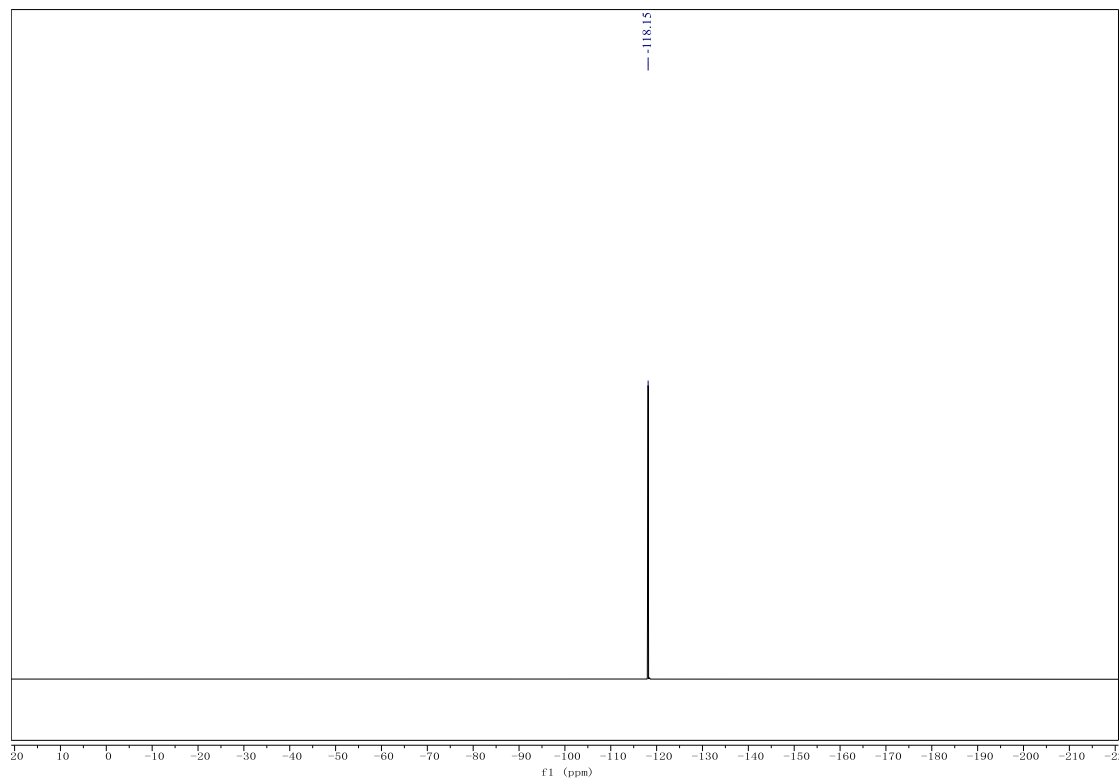

***tert*-butyl 2-((4-isopropylphenyl)amino)-2-(1-methyl-1*H*-indol-3-yl)acetate (4f)**

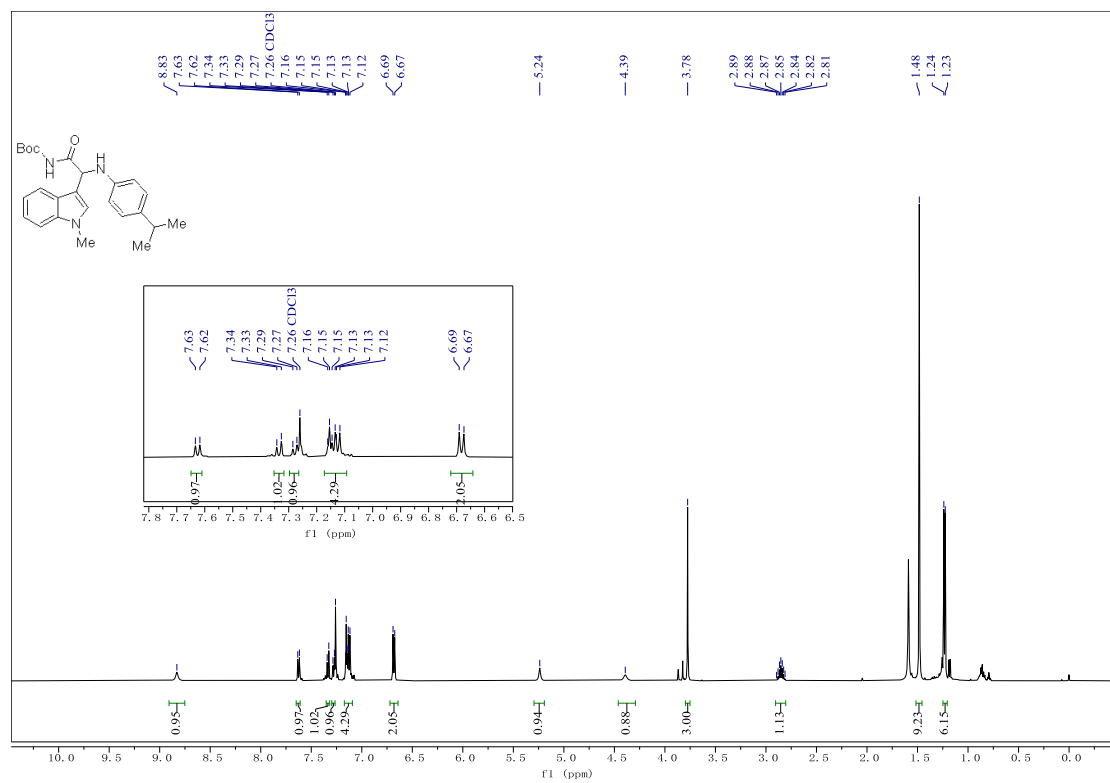





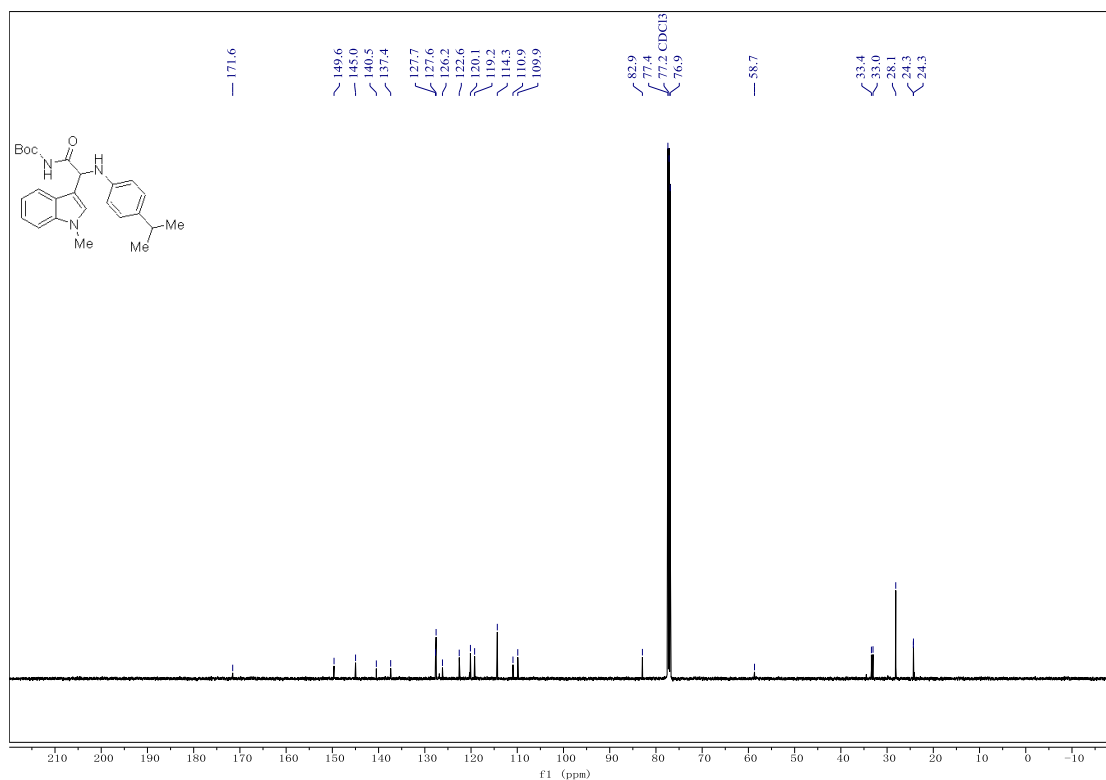

***N*-(*tert*-butyl)-2-((4-isopropylphenyl)amino)-2-(1-methyl-1*H*-indol-3-yl)acetamide (4g)**

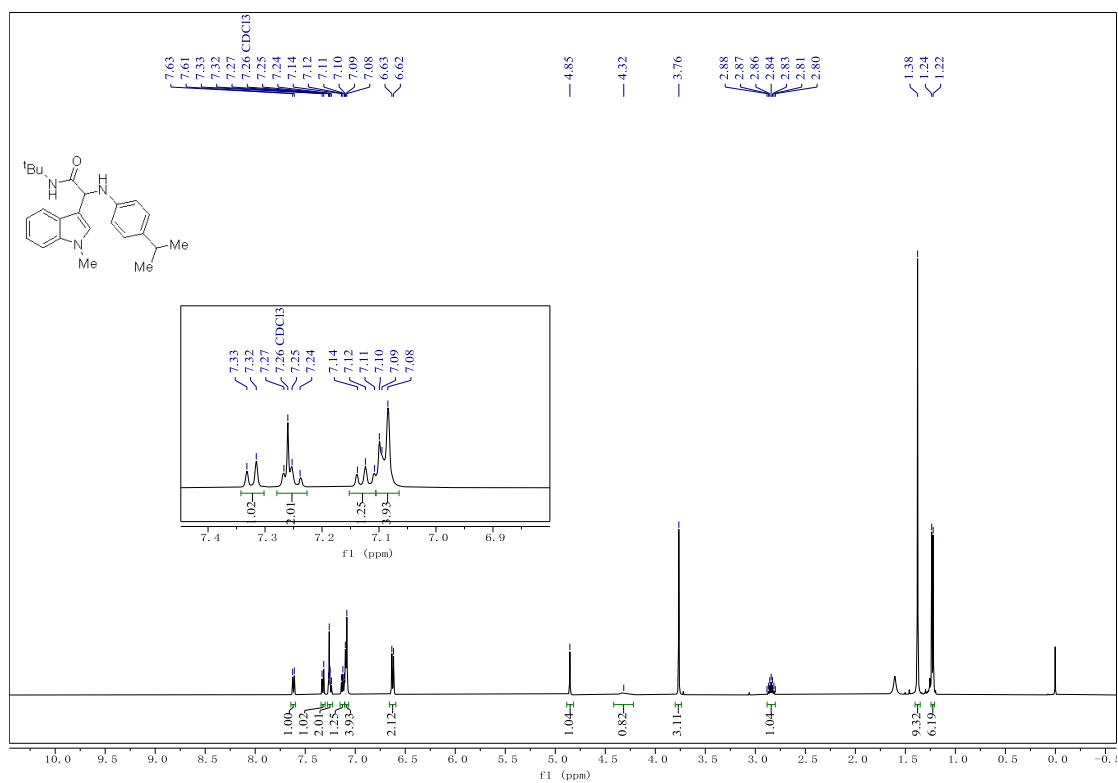

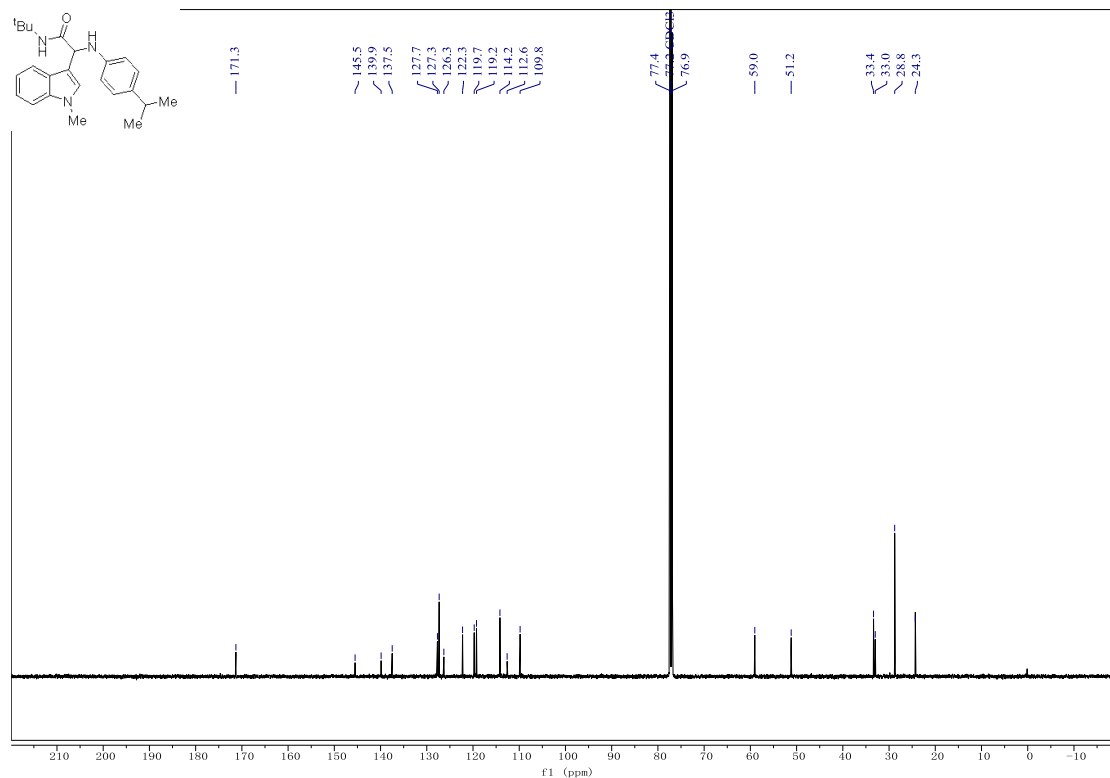

**2-((4-isopropylphenyl)amino)-N-methyl-2-phenylacetamide (5a)**

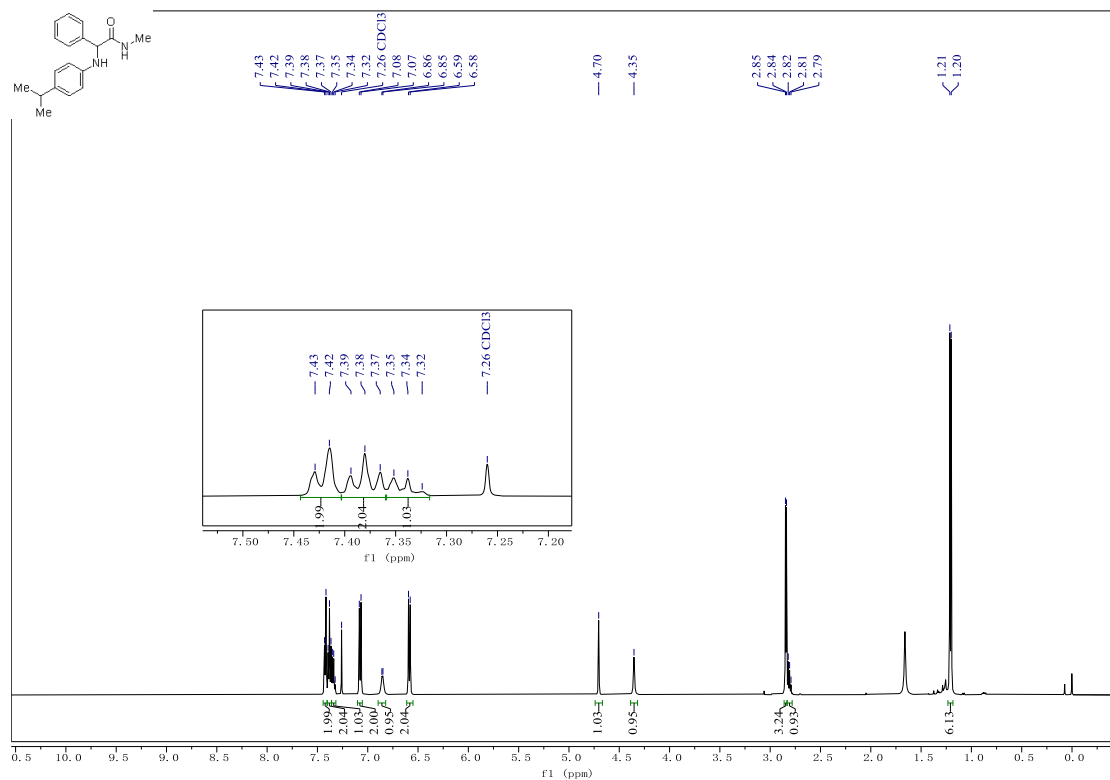

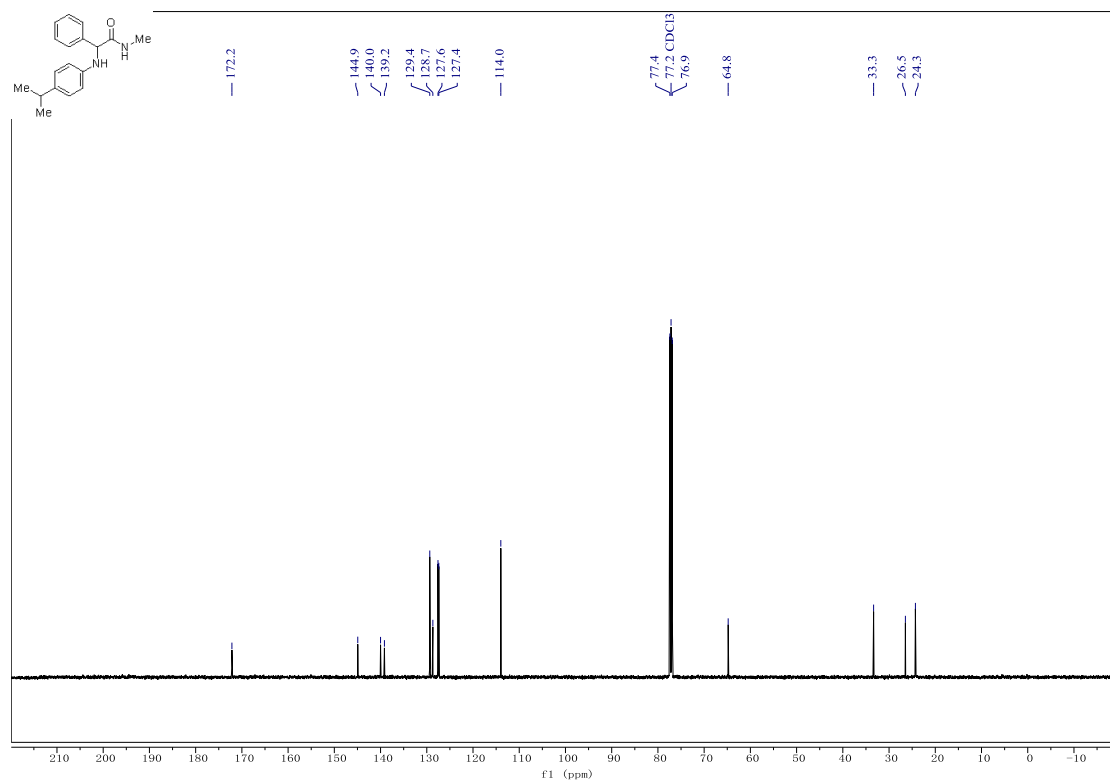

**2-((4-isopropylphenyl)amino)-2-(4-methoxyphenyl)-N-methylacetamide (5b)**

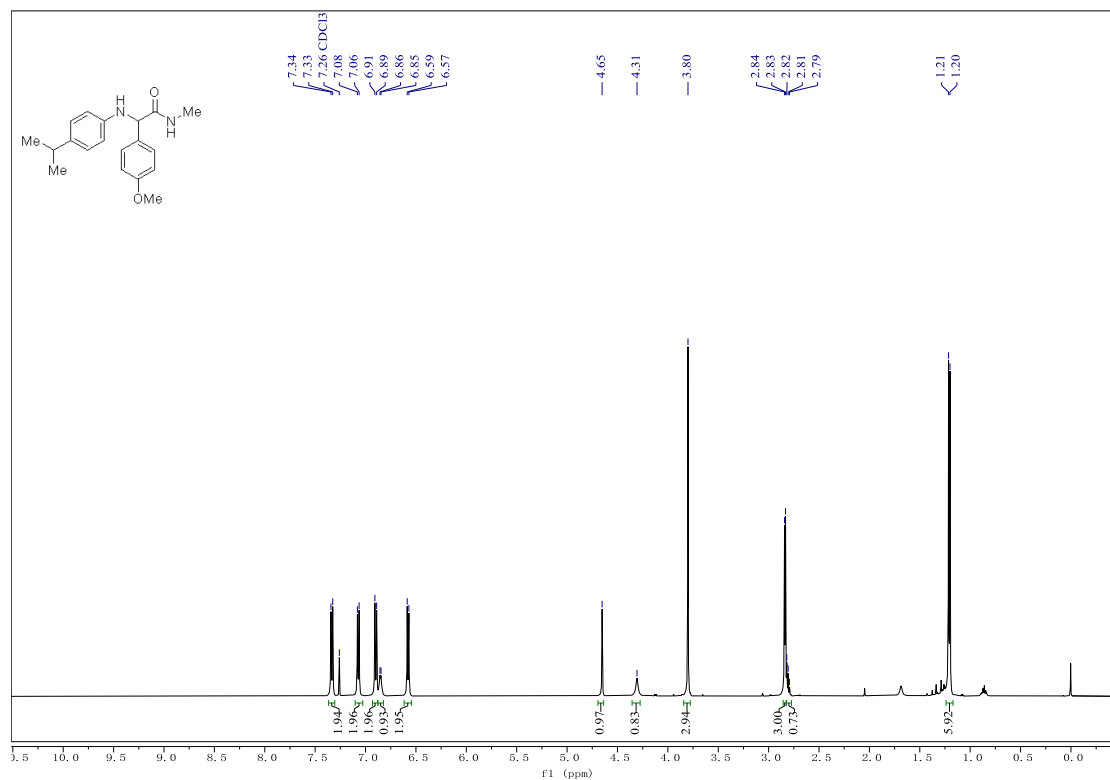

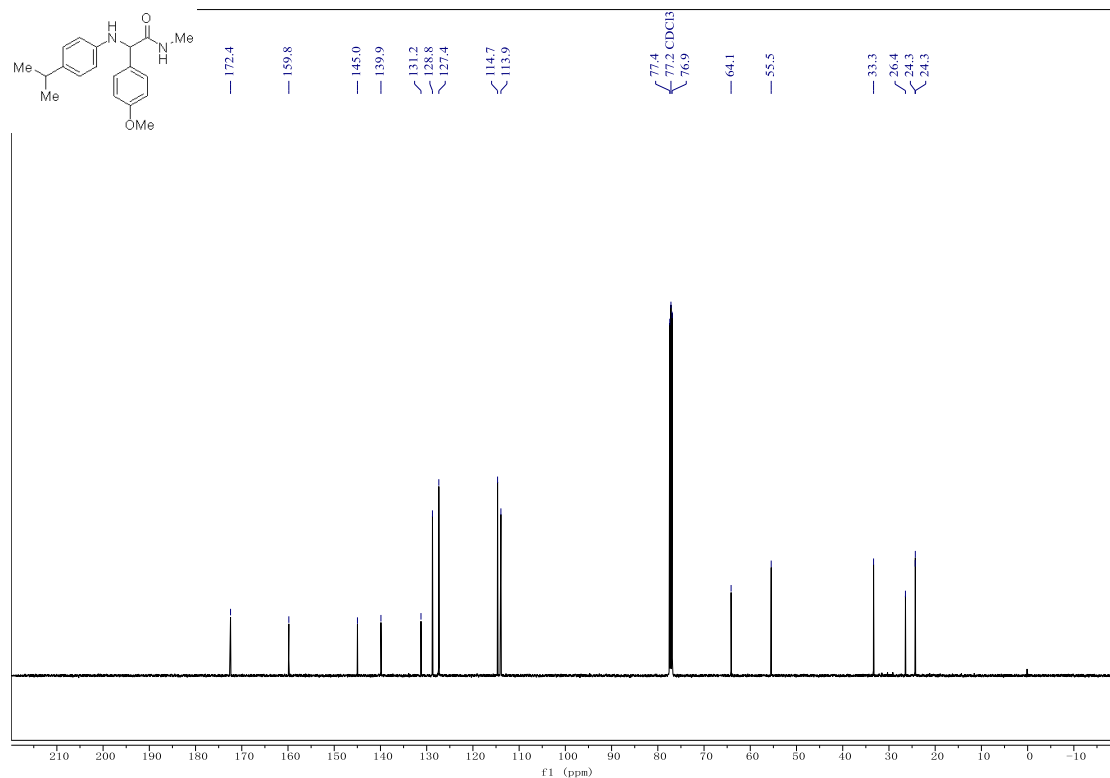

2-((1,1'-biphenyl)-4-yl)-2-((4-isopropylphenyl)amino)-N-methylacetamide (5c)

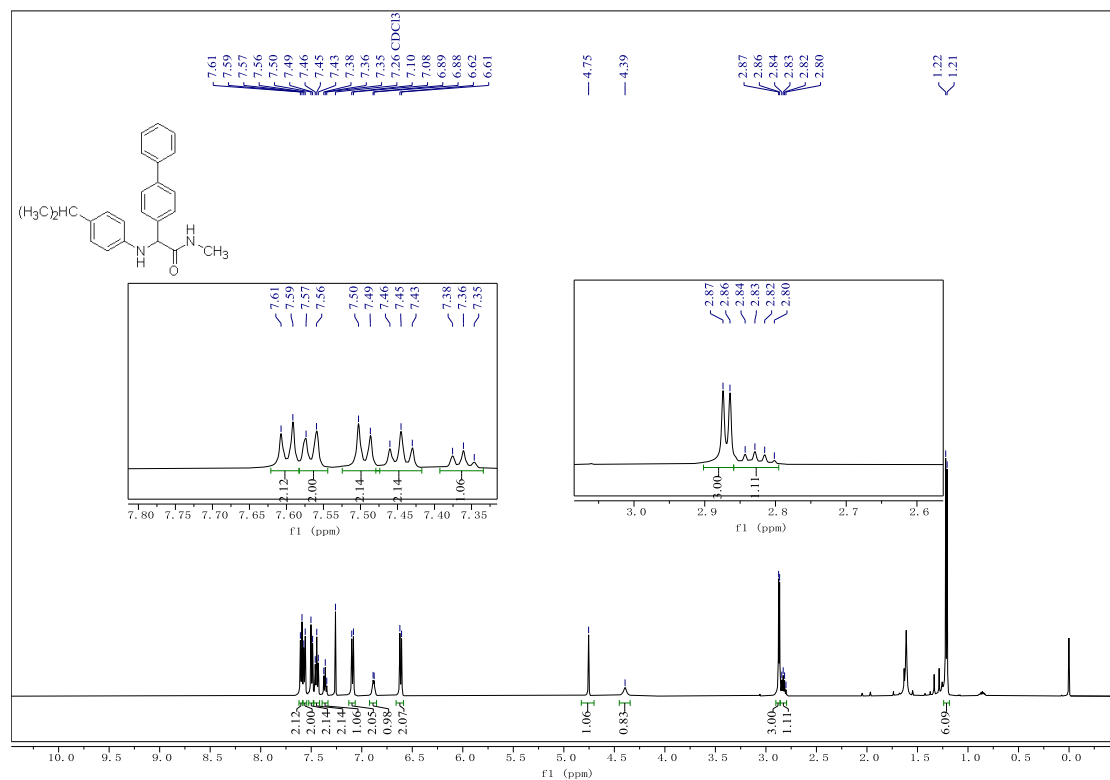

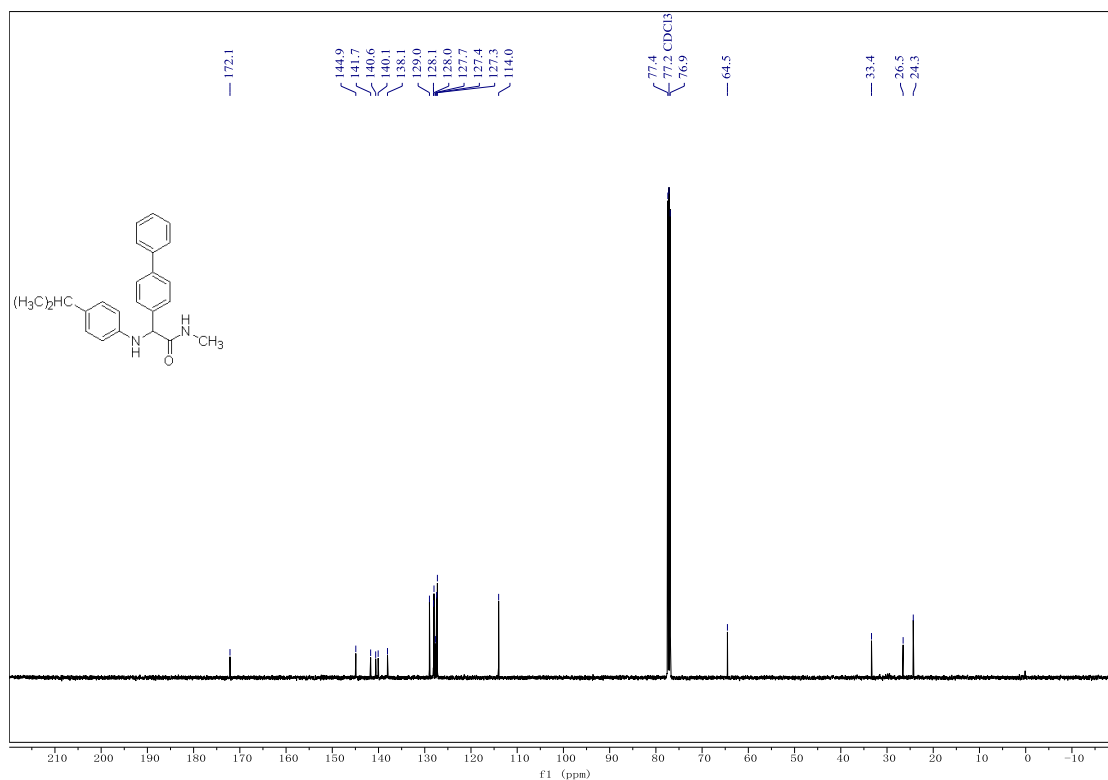

**N-methyl-2-(1-methyl-1H-indol-3-yl)-2-phenoxyacetamide (6a)**

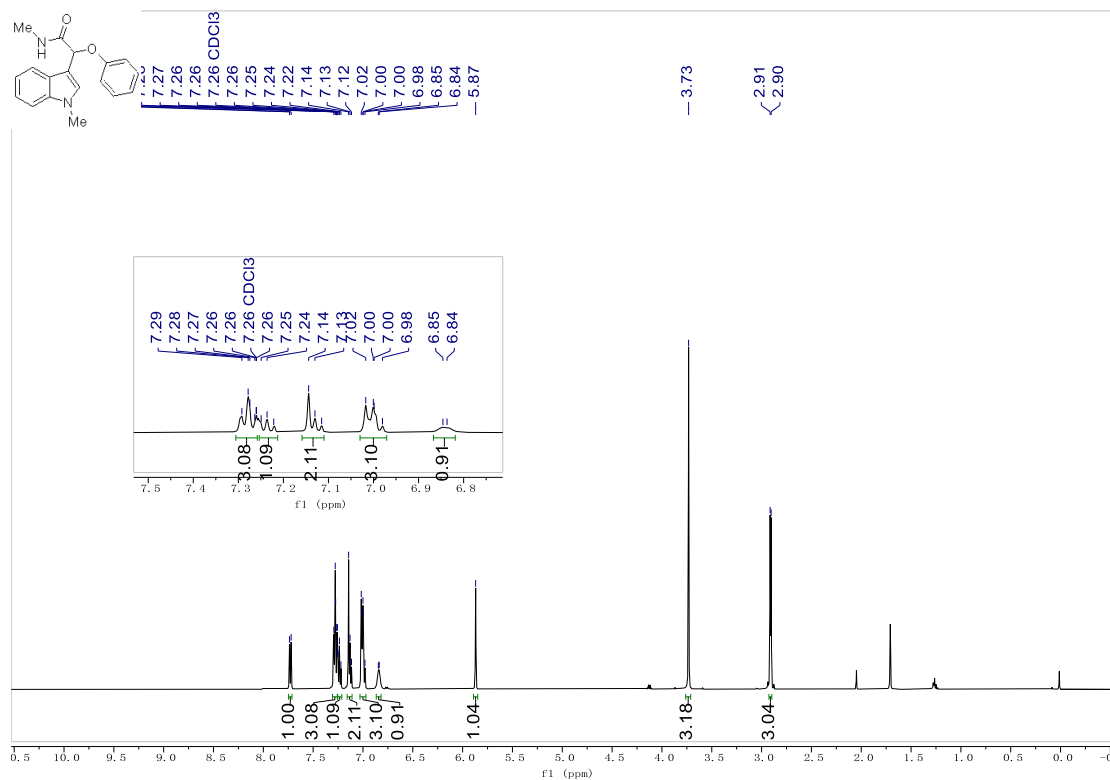

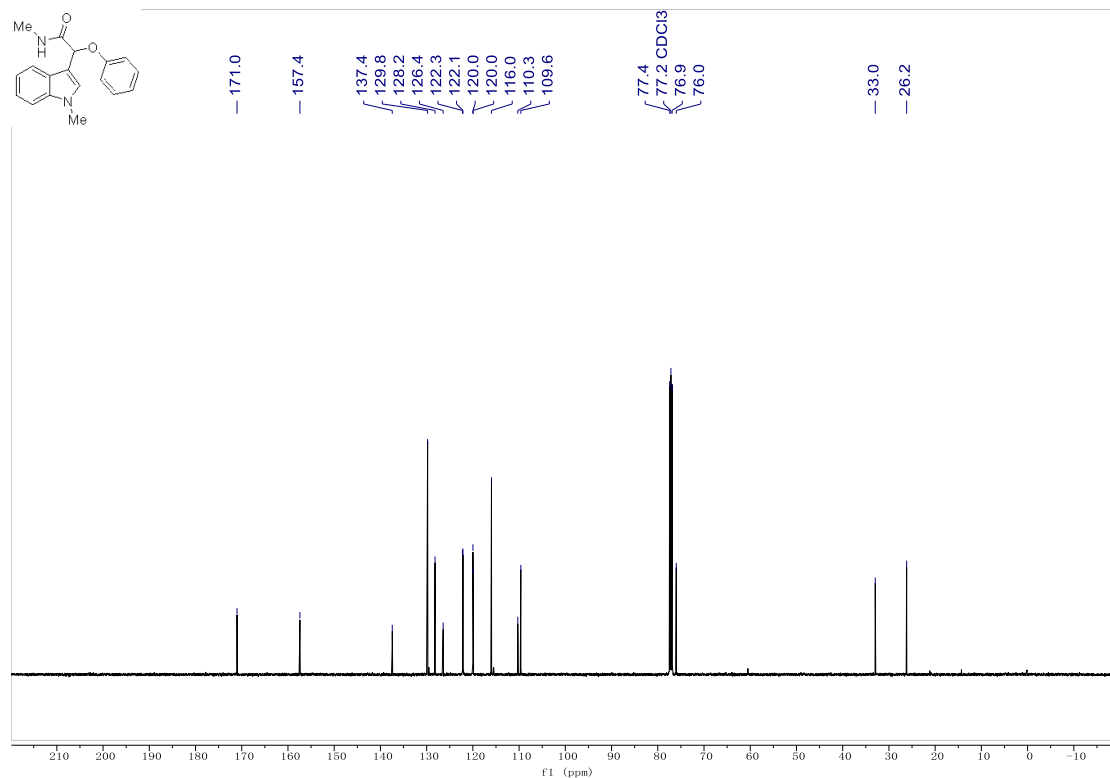

**2-(4-methoxyphenoxy)-N-methyl-2-(1-methyl-1H-indol-3-yl) acetamide (6b)**

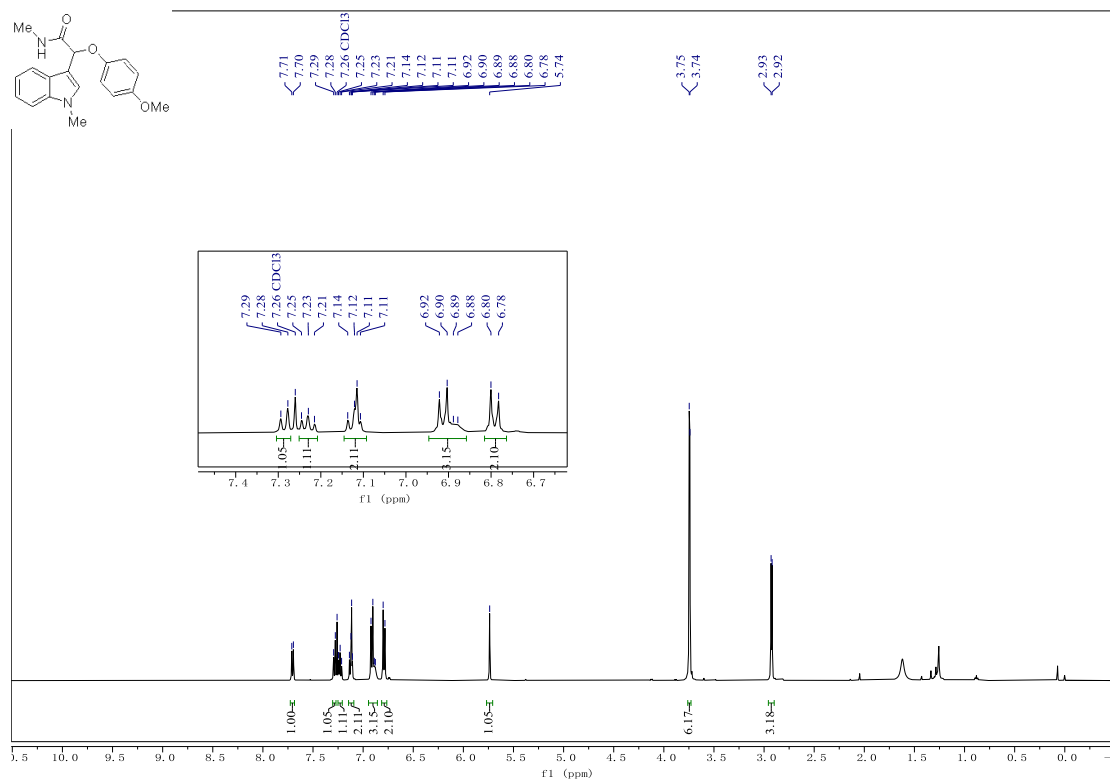

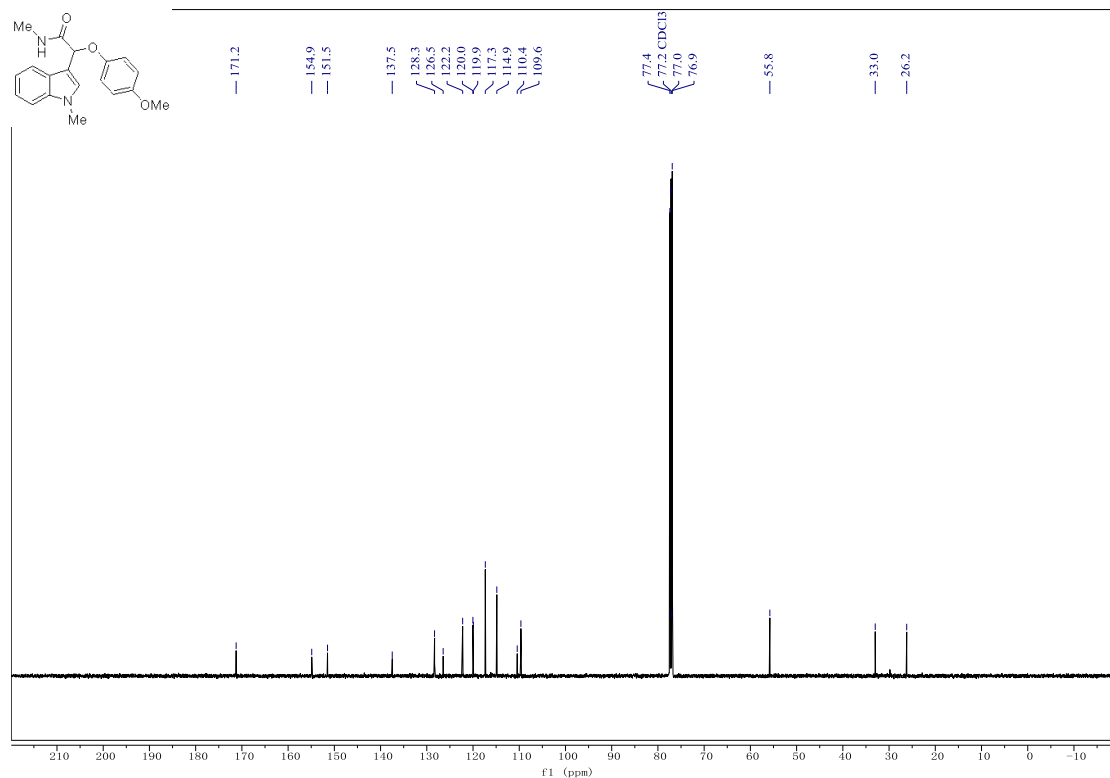

***N*-methyl-2-(1-methyl-1*H*-indol-3-yl)-2-(4-(methylthio)phenoxy) acetamide (6c)**

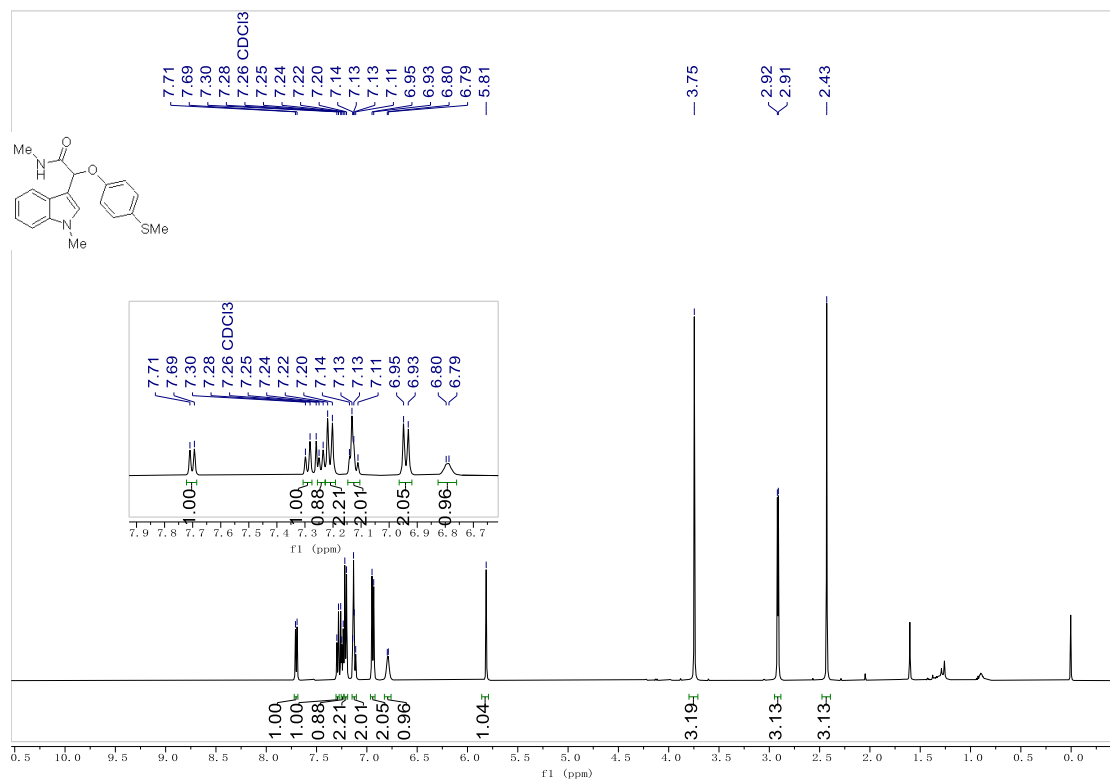



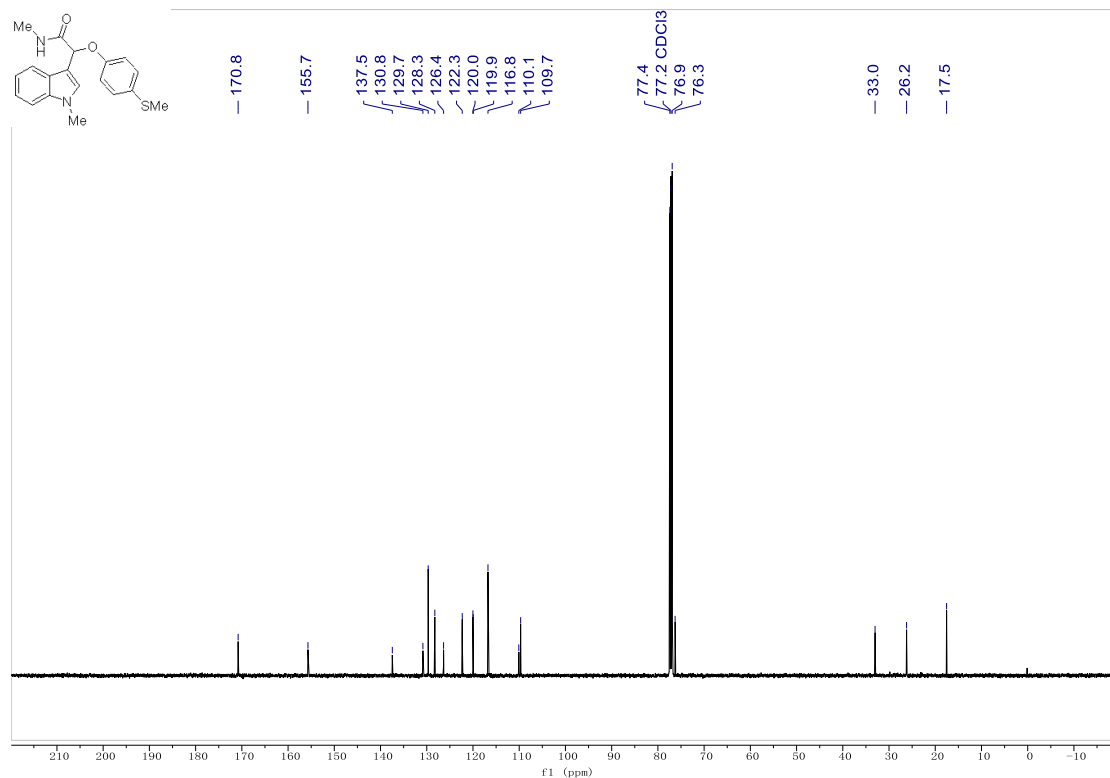

**2-(4-fluorophenoxy)-N-methyl-2-(1-methyl-1H-indol-3-yl)acetamide (6d)**

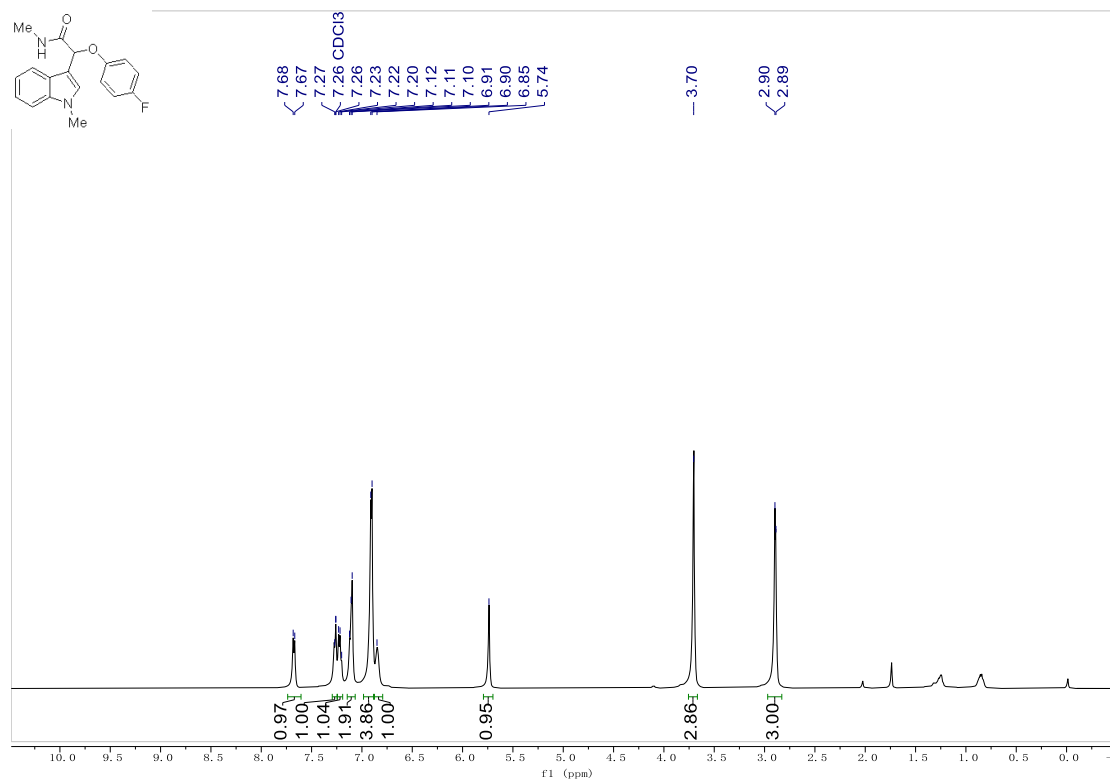

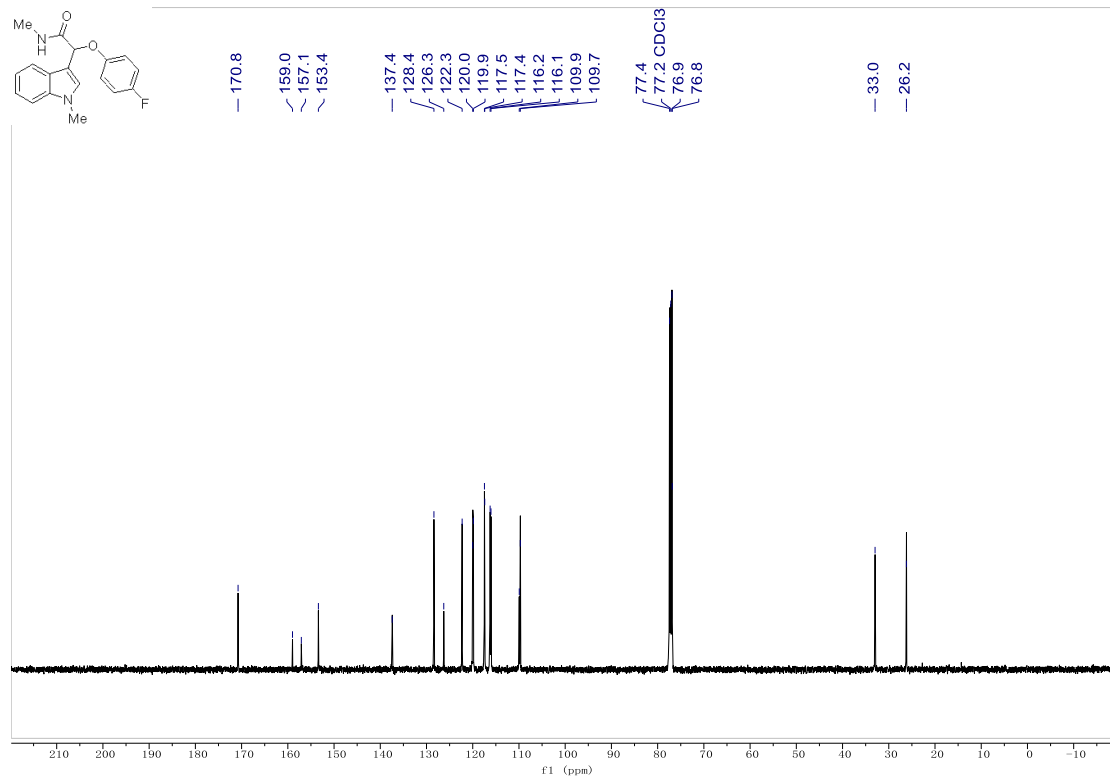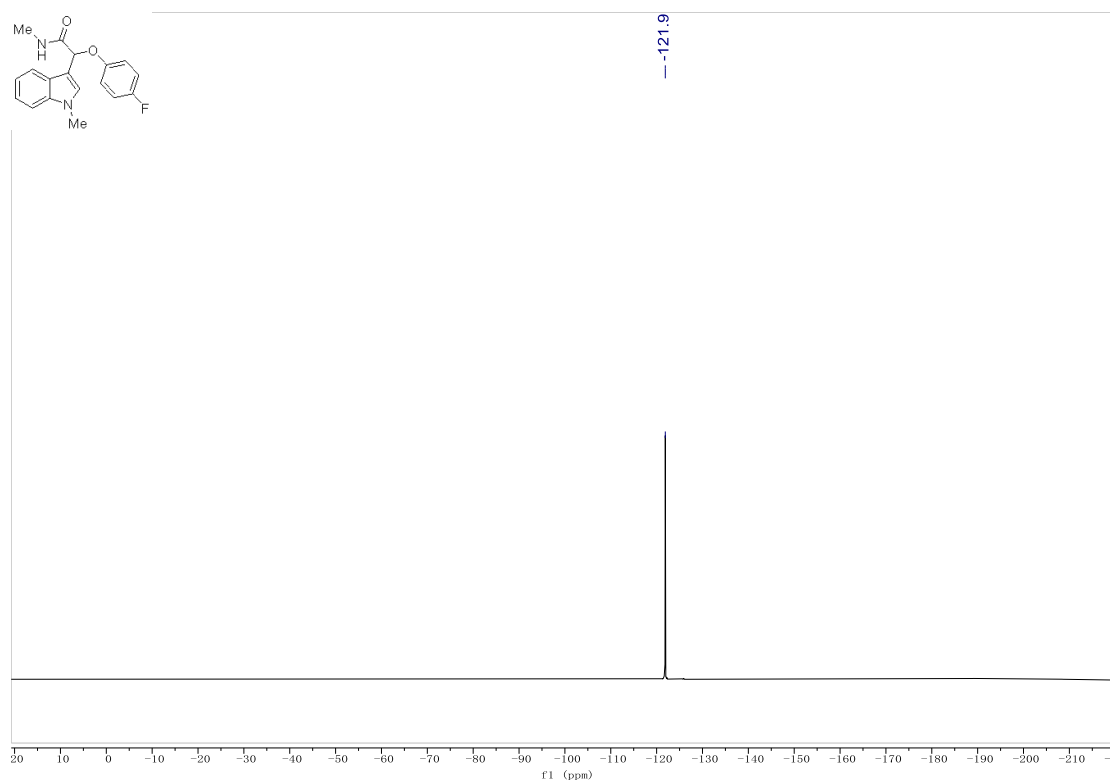

***N*-methyl-2-(1-methyl-1*H*-indol-3-yl)-2-(4-(trifluoromethyl)phenoxy)acetamide (6e)**

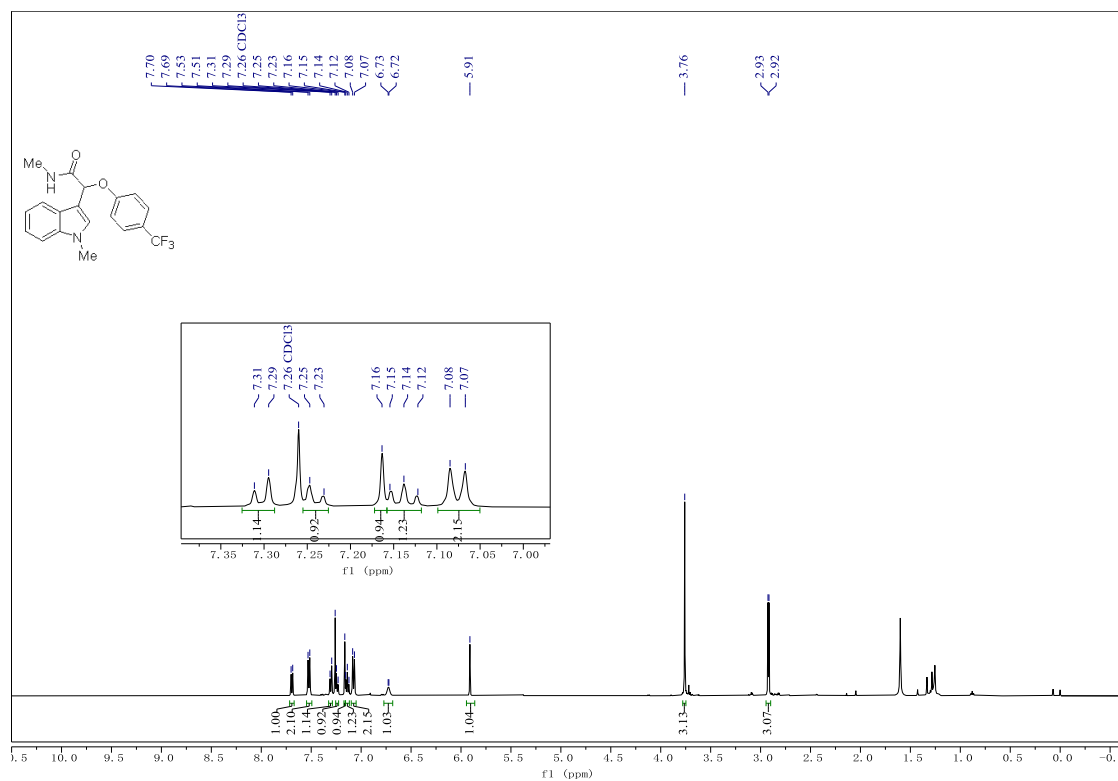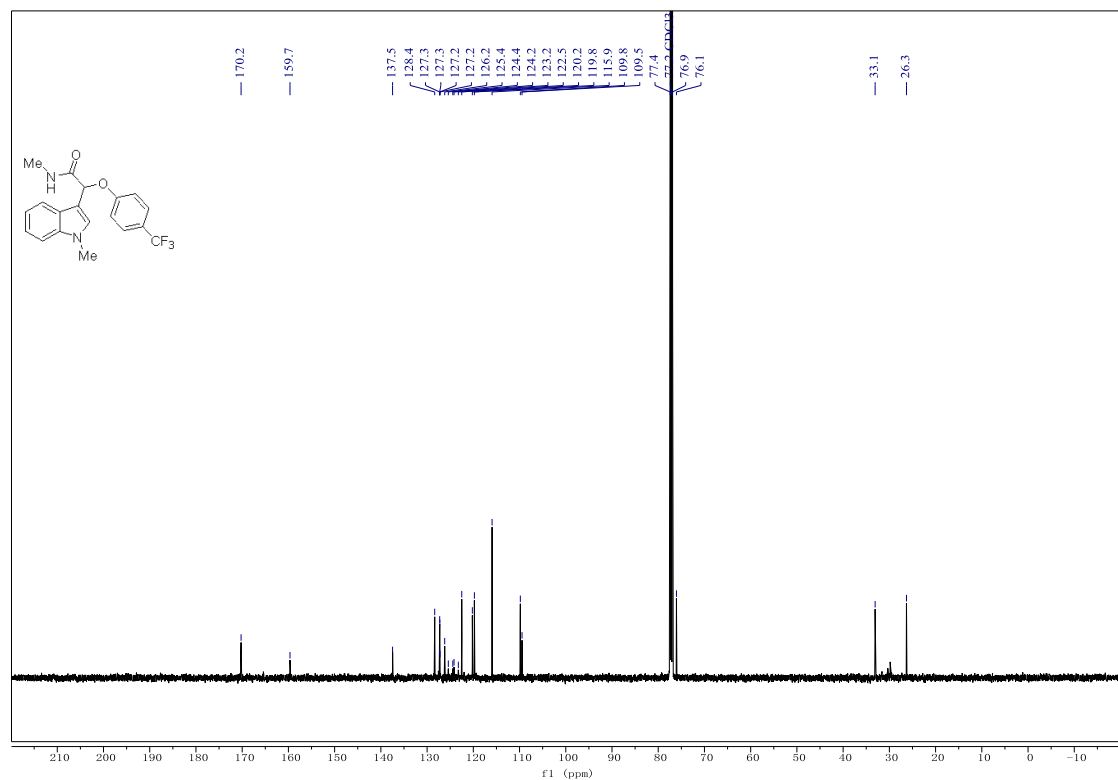

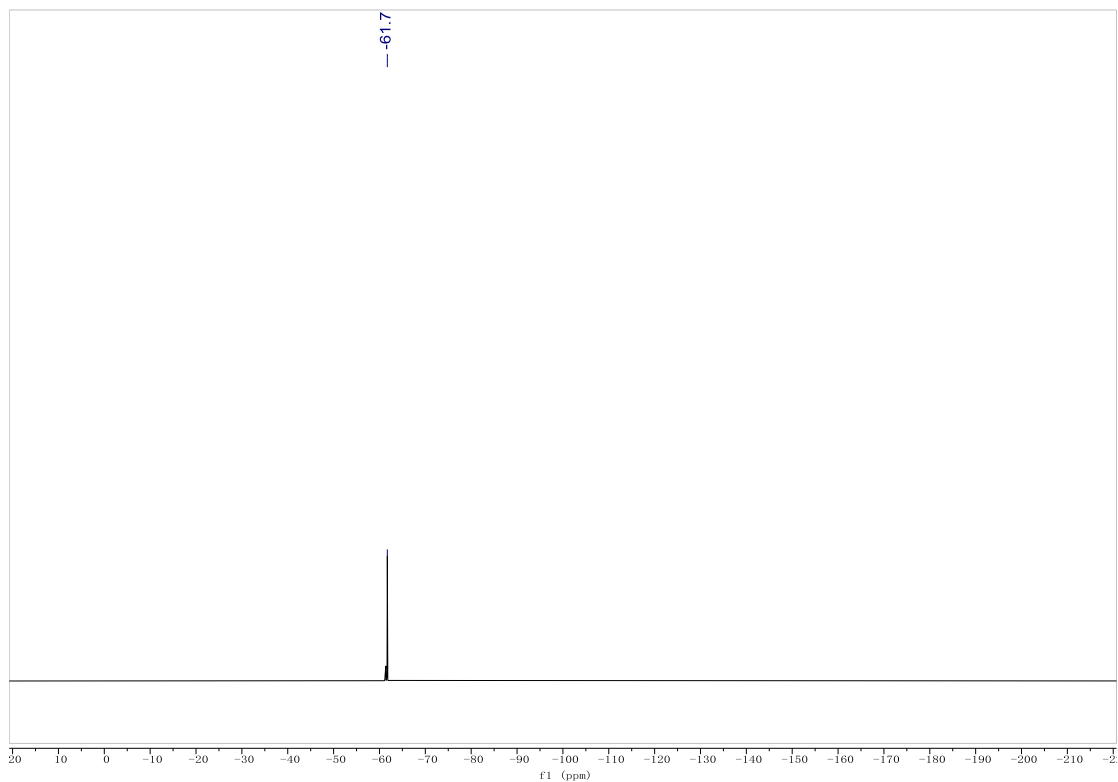

**2-(4-cyanophenoxy)-*N*-methyl-2-(1-methyl-1*H*-indol-3-yl)acetamide (6f)**

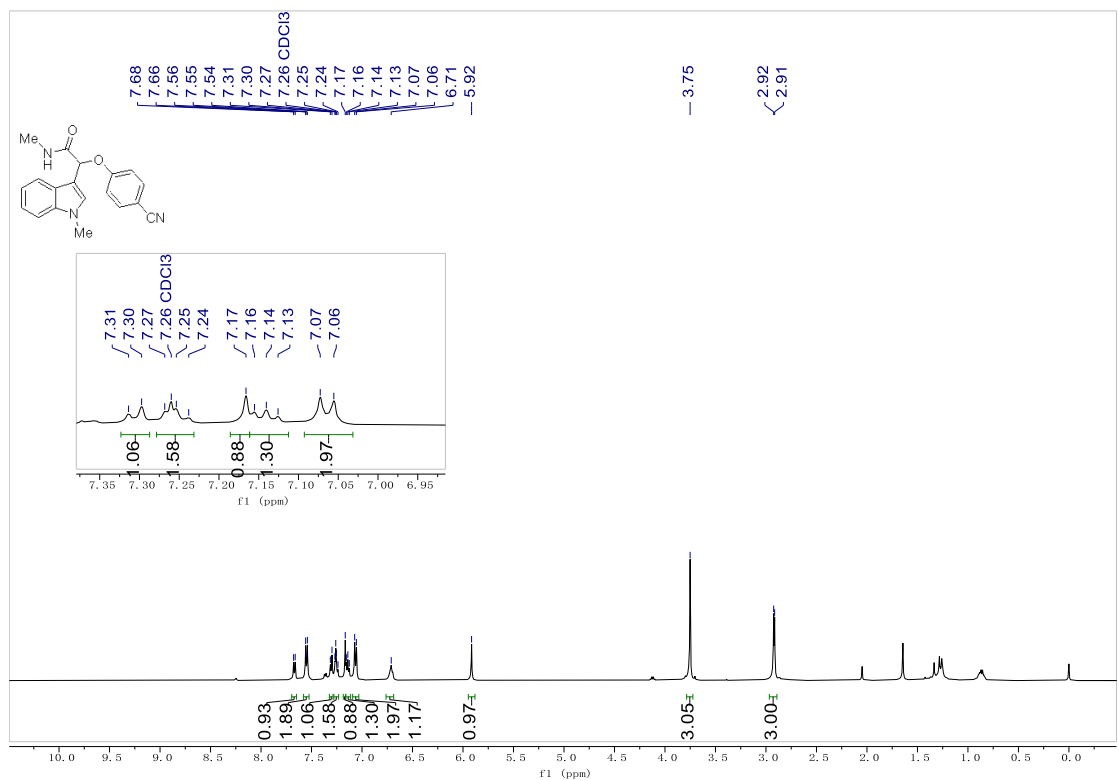

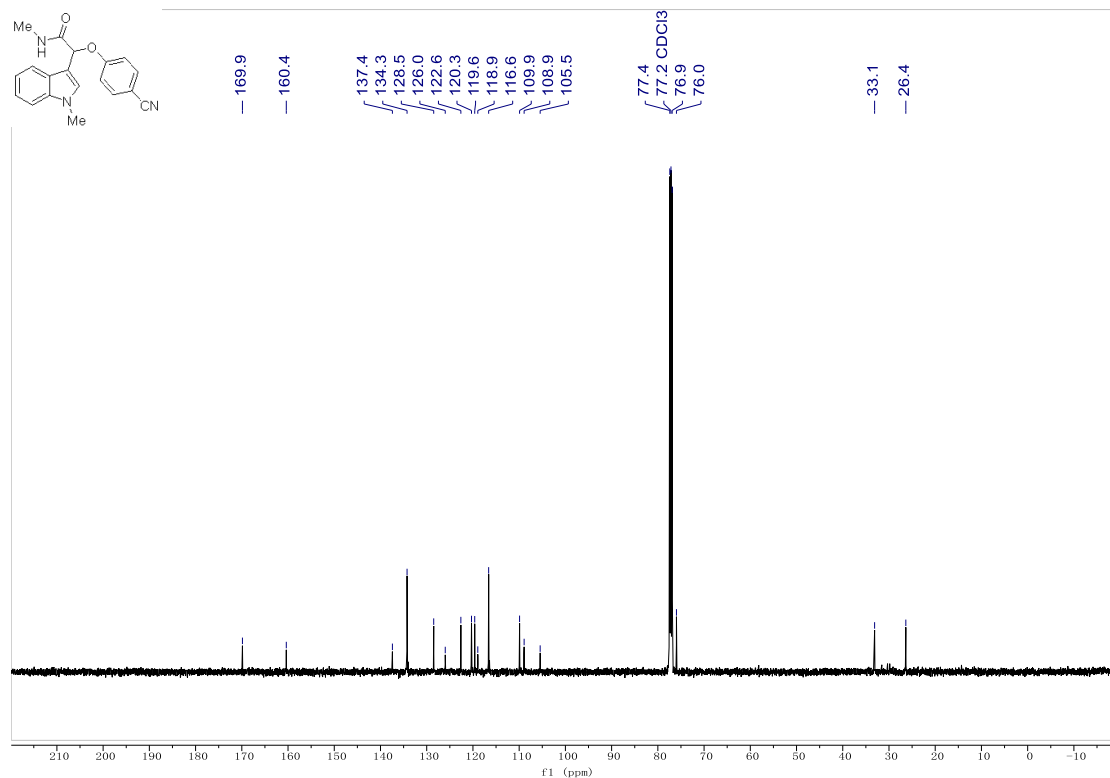

**ethyl 4-(1-(1-methyl-1H-indol-3-yl)-2-(methylamino)-2-oxoethoxy)benzoate (6g)**

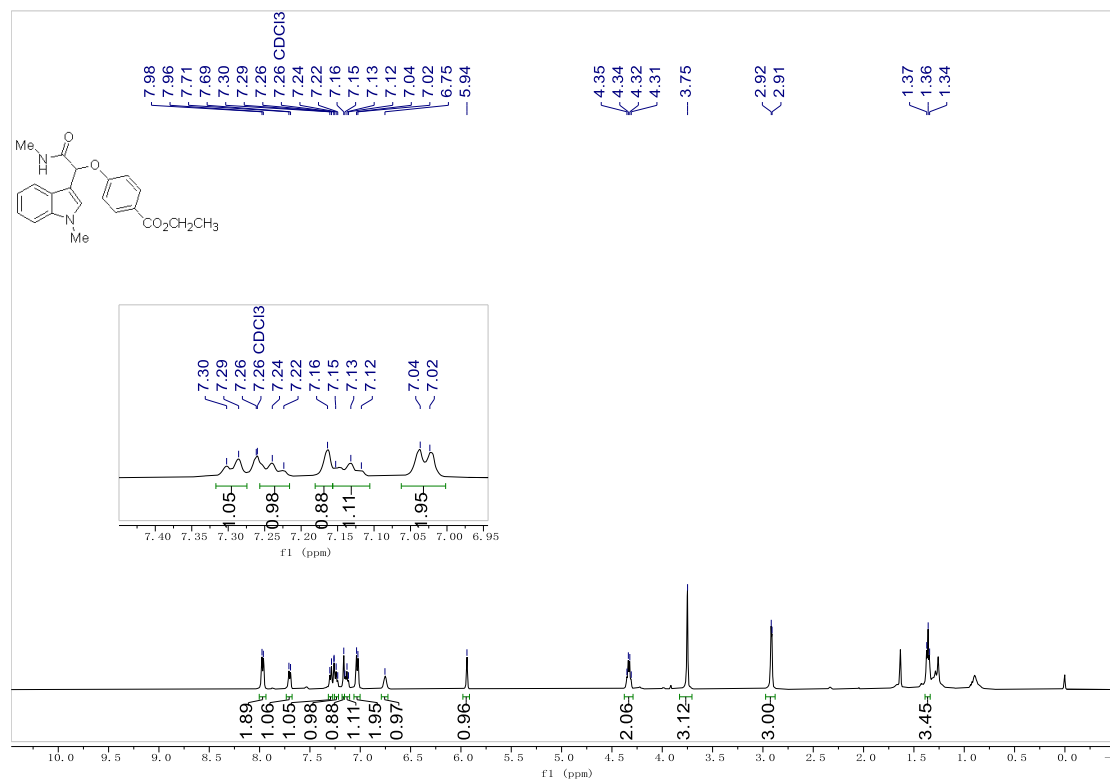

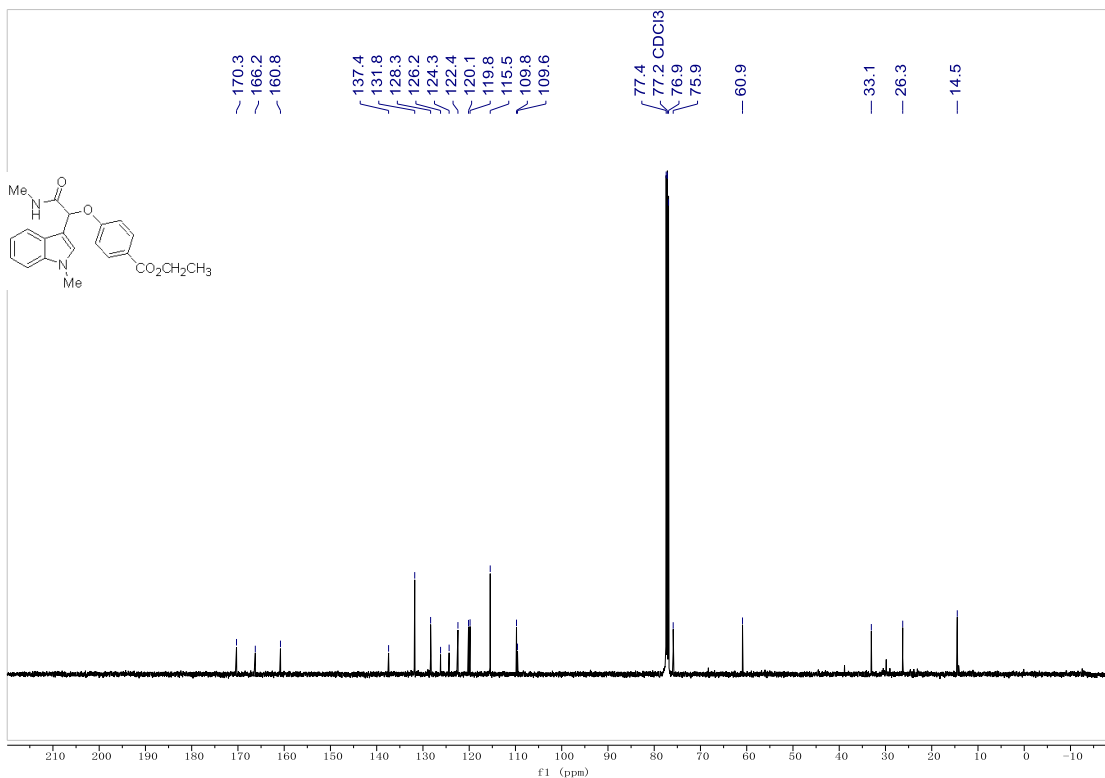

**2-(3-bromophenoxy)-N-methyl-2-(1-methyl-1H-indol-3-yl)acetamide (6h)**

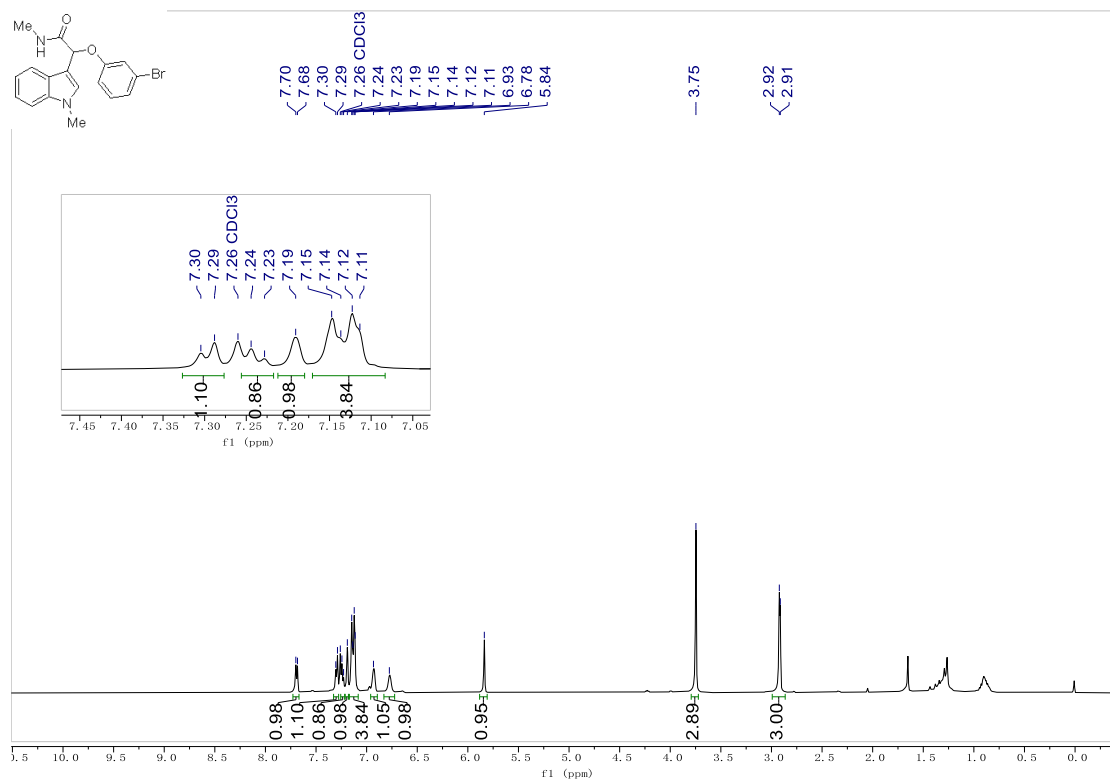

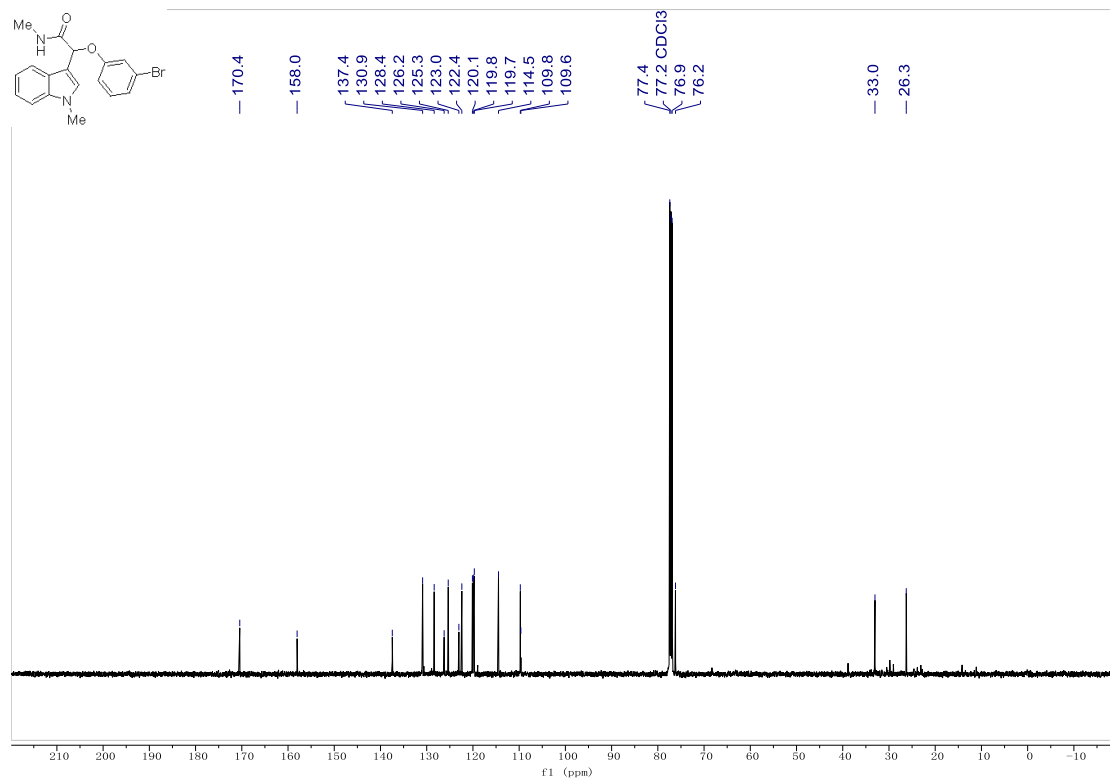

***N*-methyl-2-(1-methyl-1*H*-indol-3-yl)-2-(*o*-tolyoxy)acetamide (6i)**

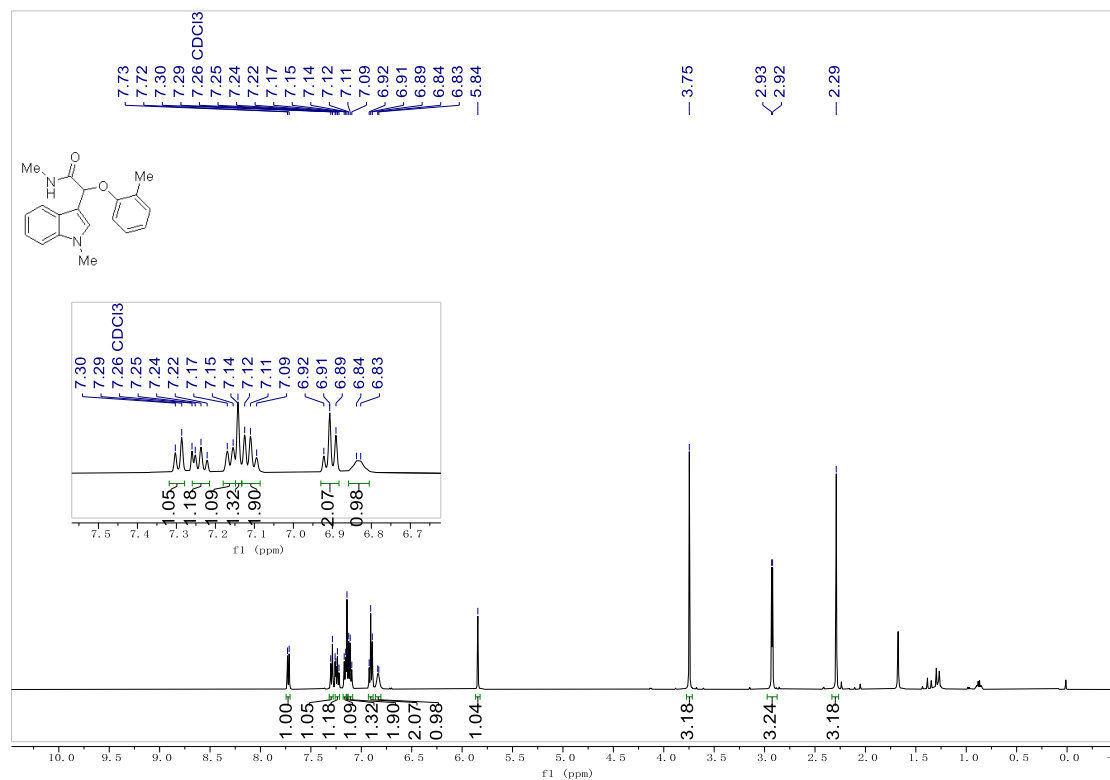

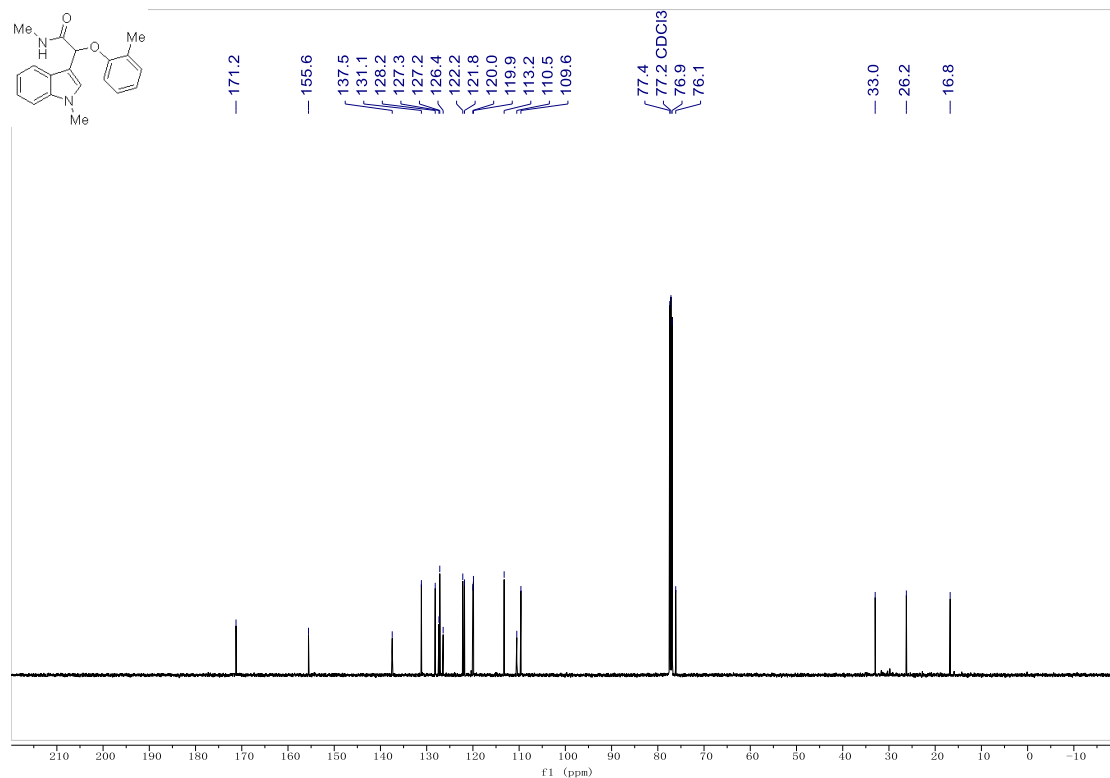

**2-(benzo[d][1,3]dioxol-5-yloxy)-N-methyl-2-(1-methyl-1H-indol-3-yl)acetamide (6j)**

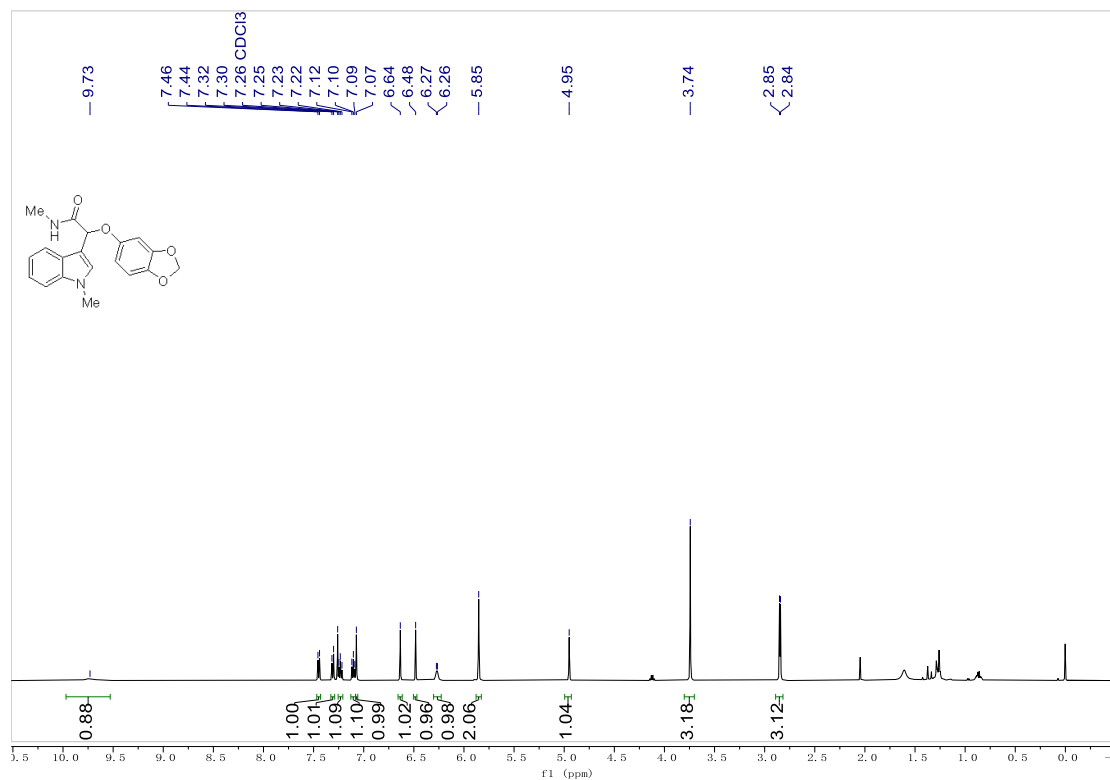



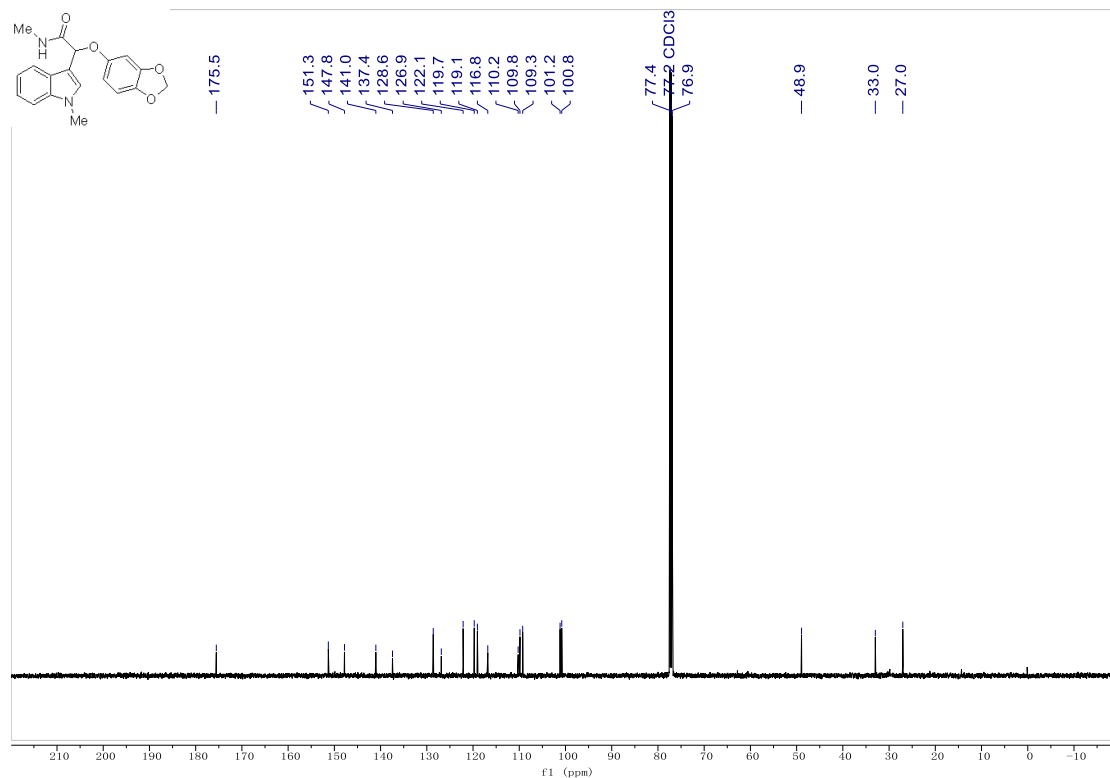

*N*-methyl-2-(1-methyl-1*H*-indol-3-yl)-2-(naphthalen-2-yloxy) acetamide (6k)

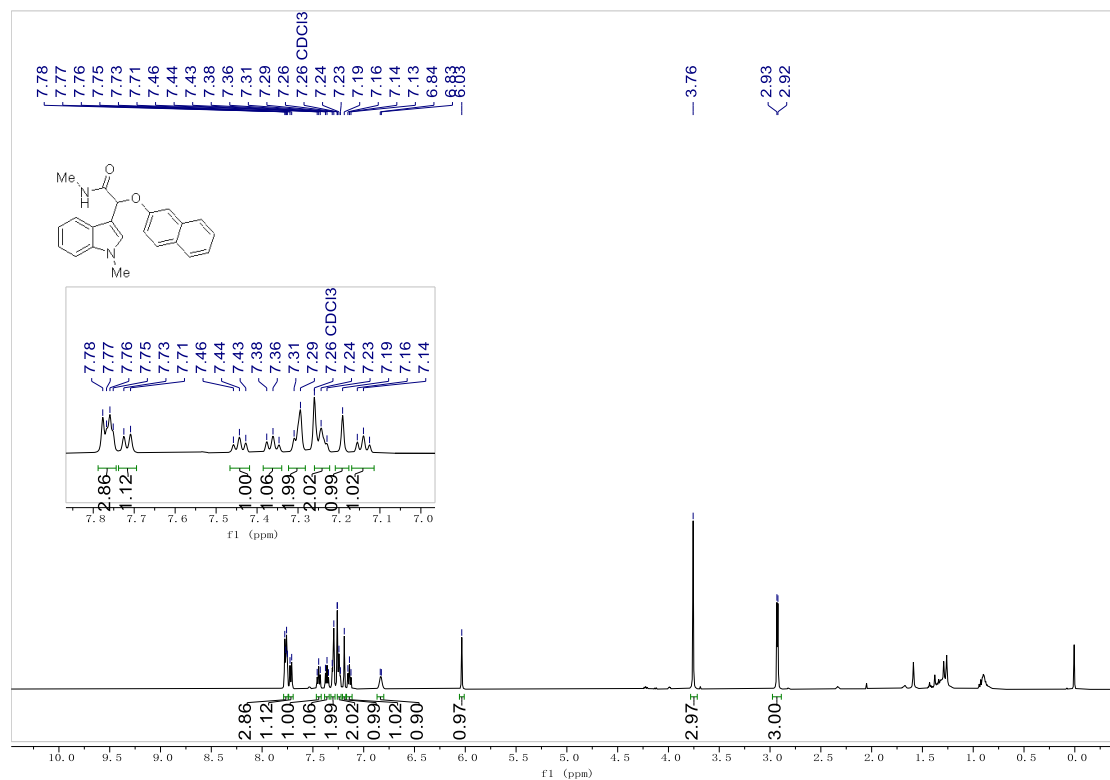

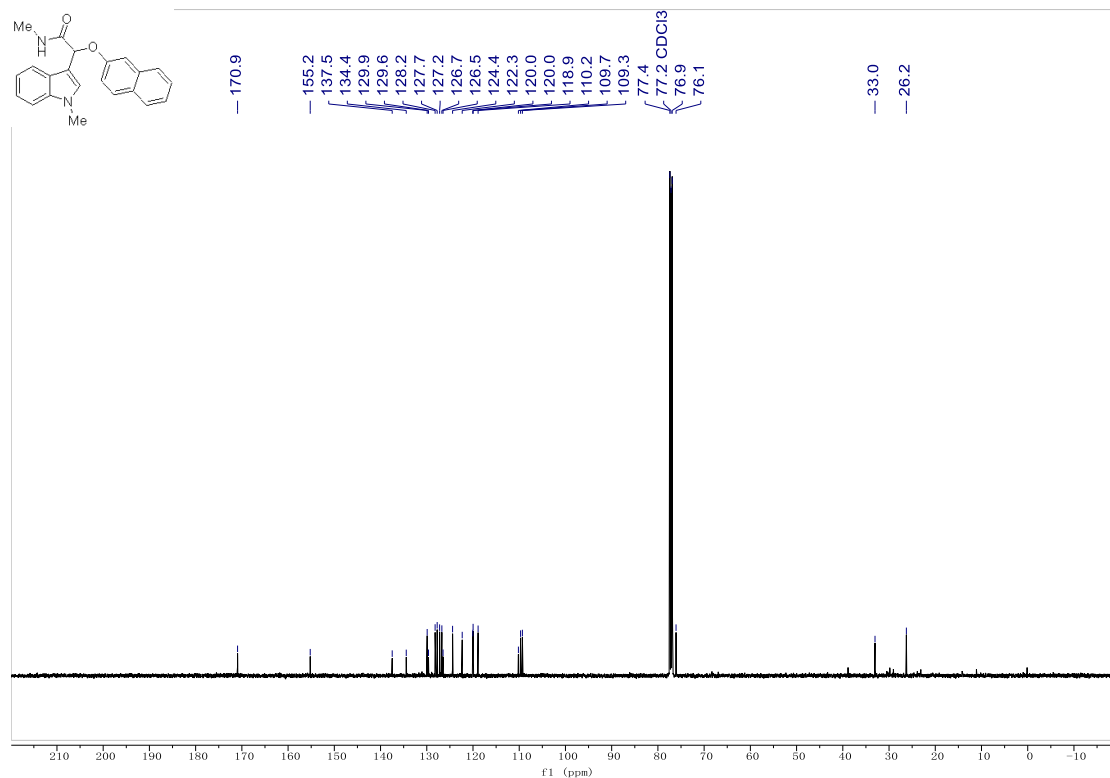

**2-ethoxy-N-methyl-2-(1-methyl-1H-indol-3-yl)acetamide (6l)**

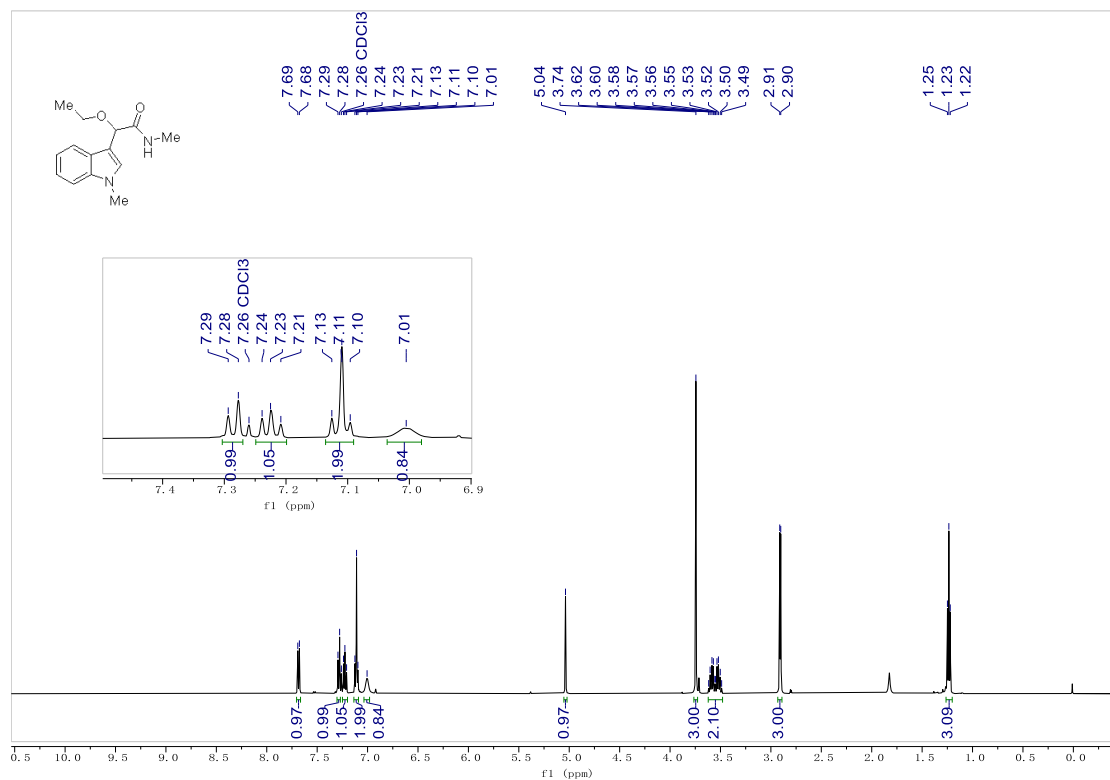

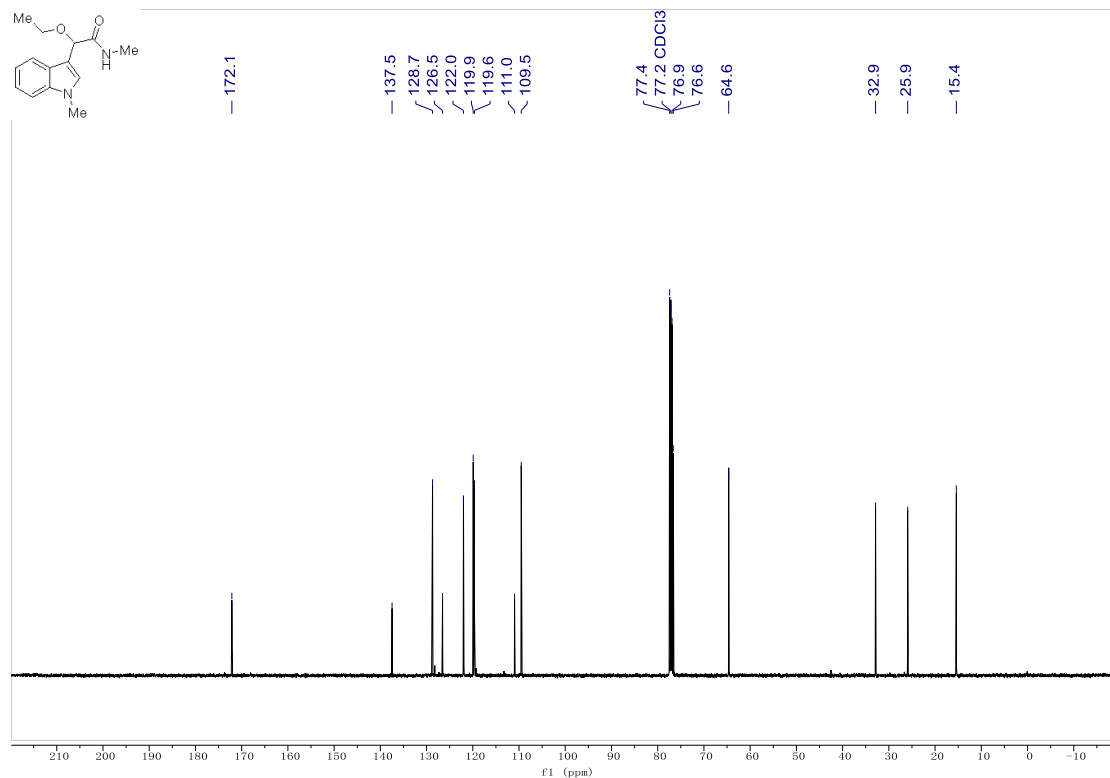

**2-(but-3-en-1-yloxy)-N-methyl-2-(1-methyl-1H-indol-3-yl)acetamide (6m)**

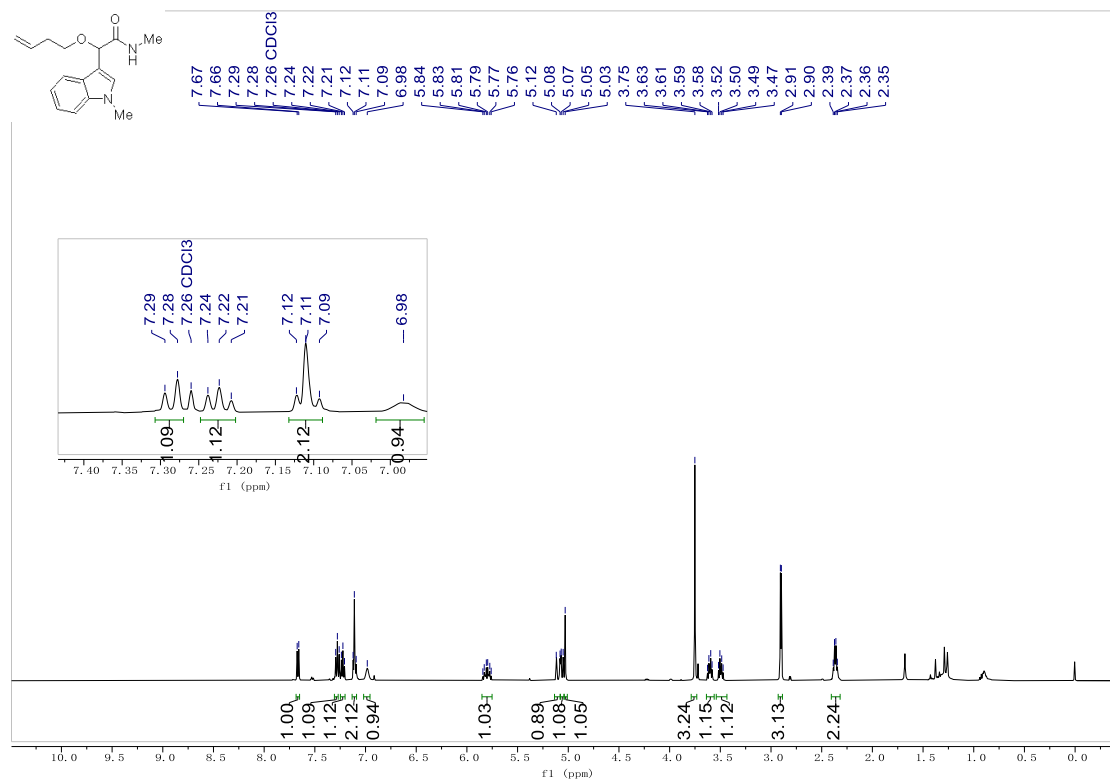

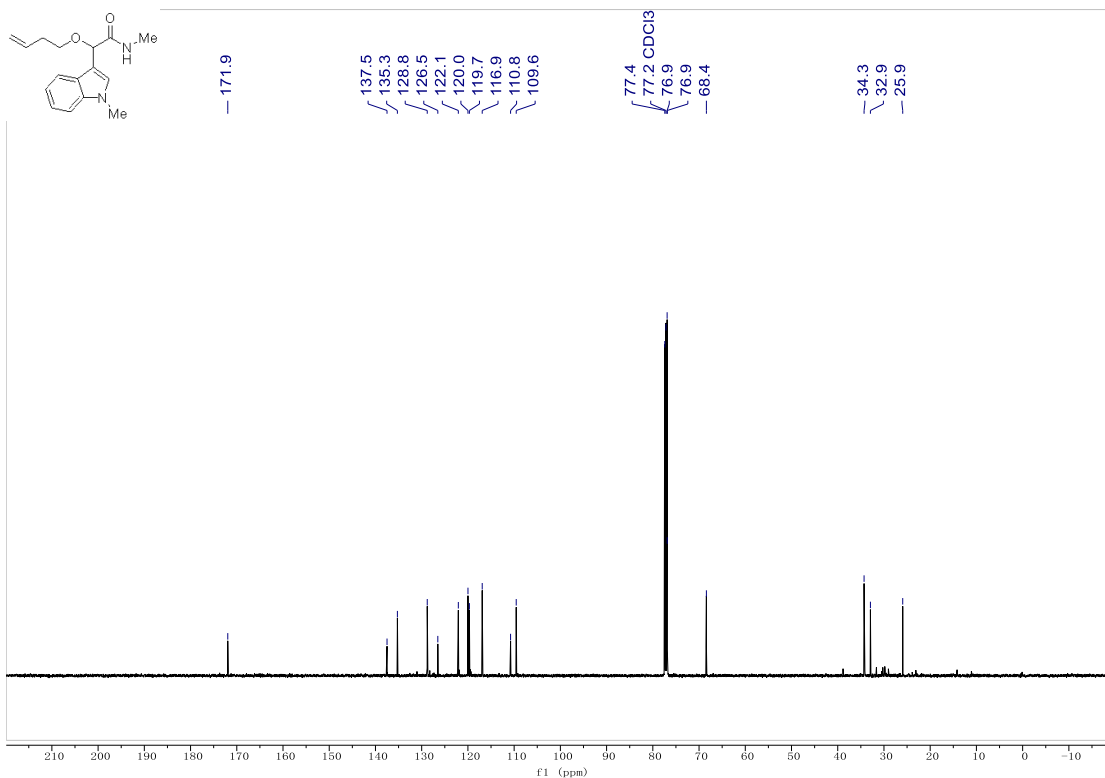

**2-(3-(benzyloxy)propyl)-N-methyl-2-(1-methyl-1H-indol-3-yl)acetamide (6n)**

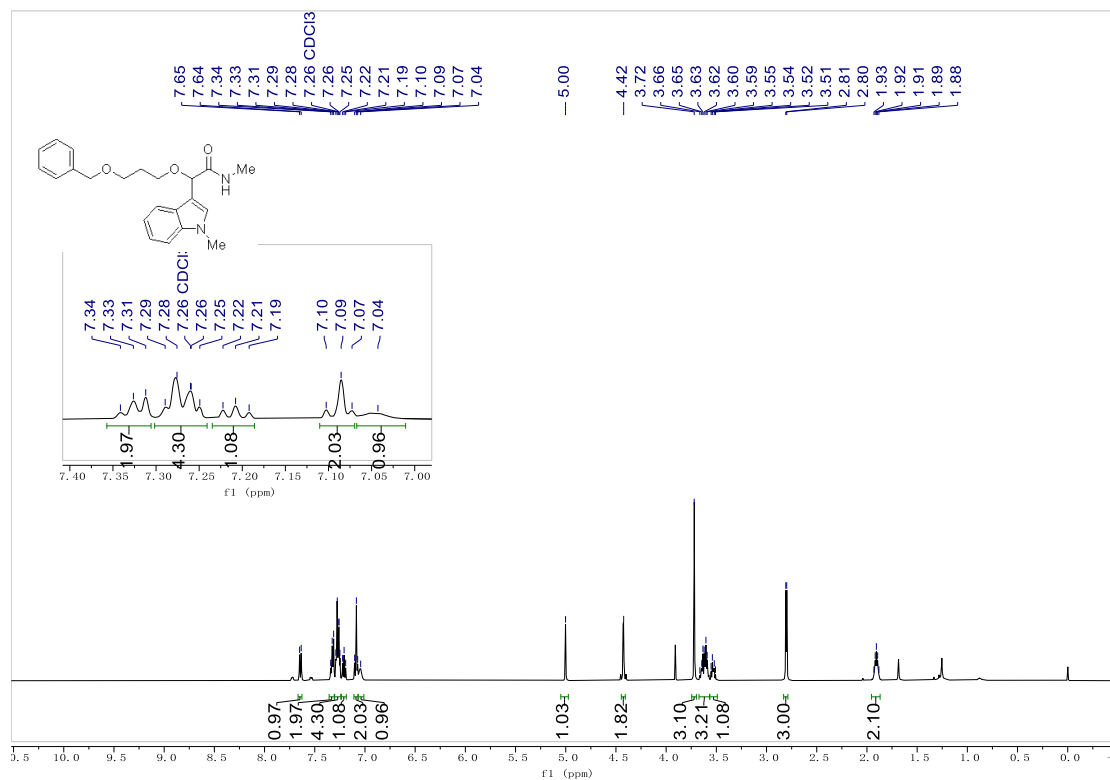

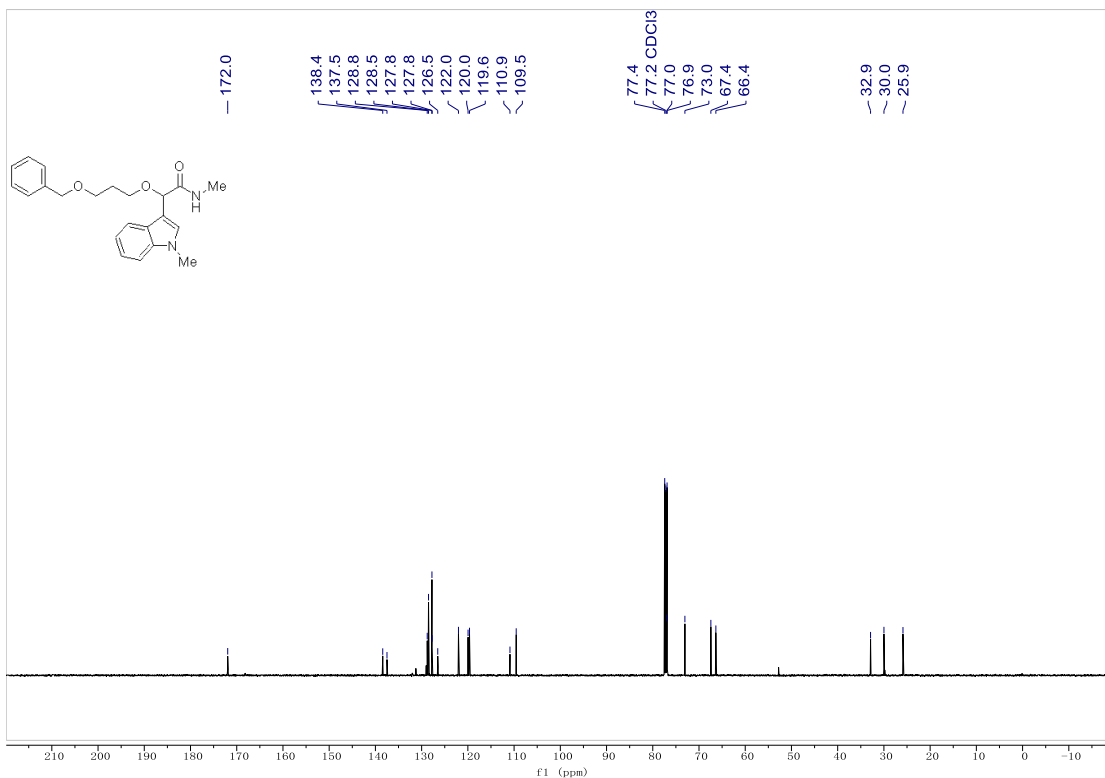

**2-(benzyloxy)-N-methyl-2-(1-methyl-1H-indol-3-yl)acetamide (60)**

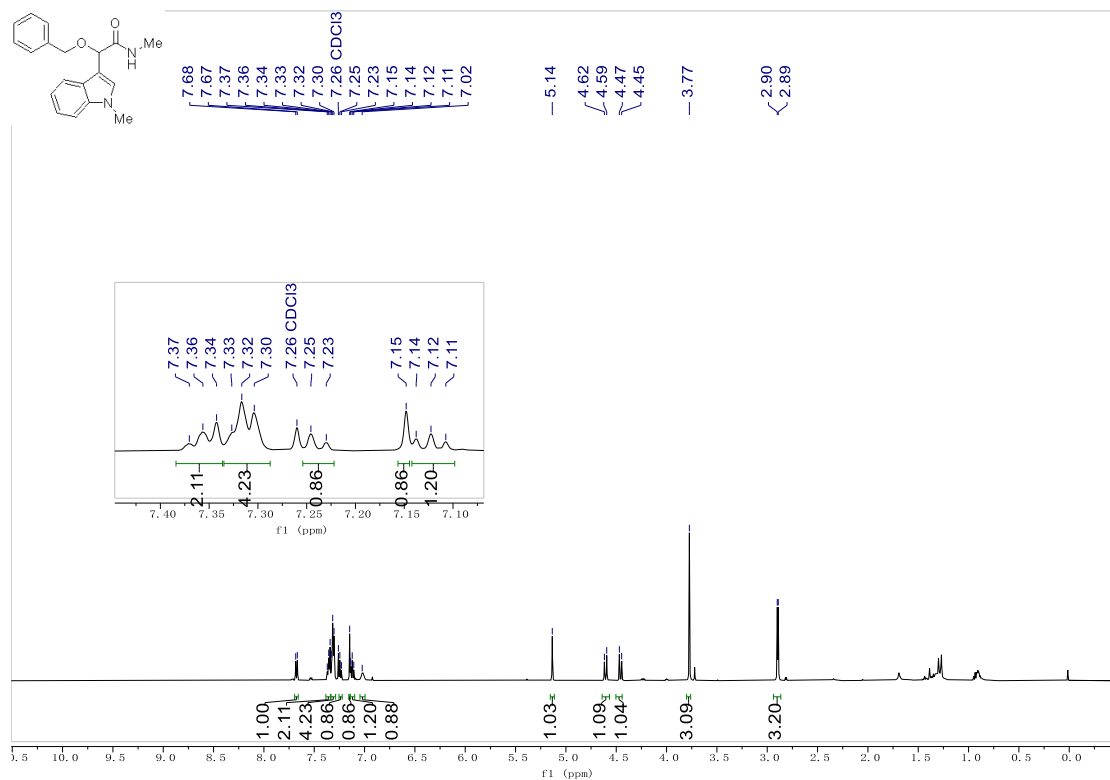

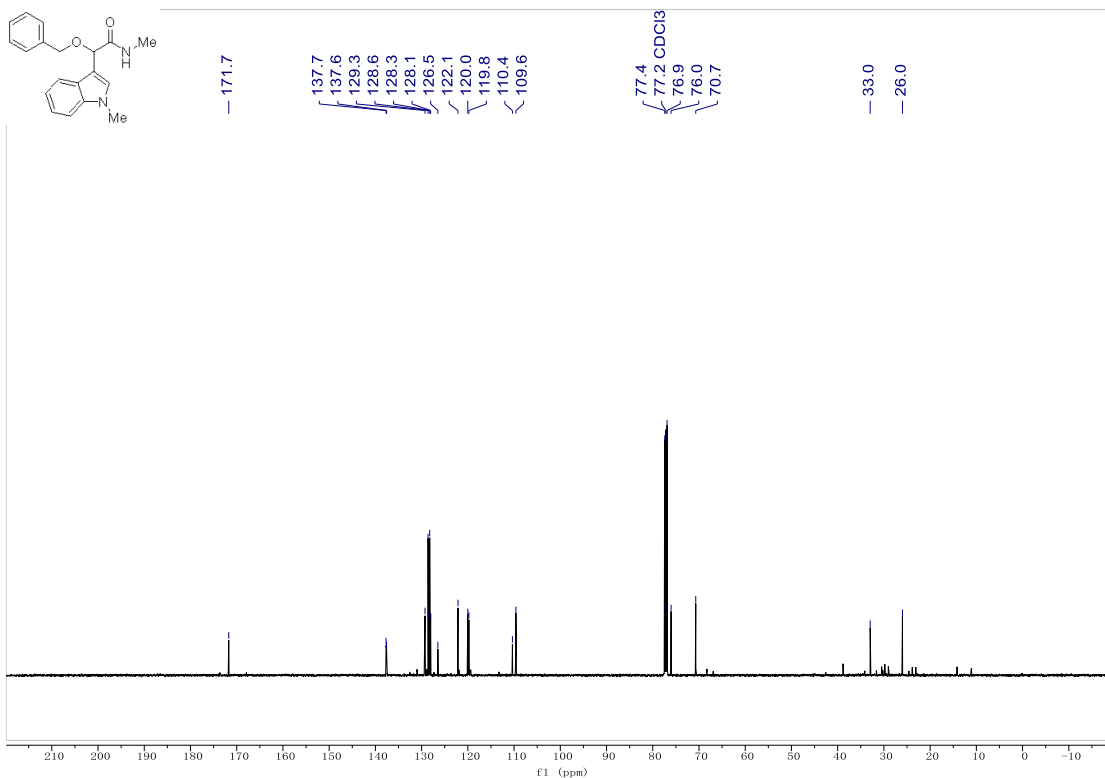

***N*-methyl-2-(1-methyl-1*H*-indol-3-yl)-2-(2,2,2-trifluoroethoxy)acetamide (6p)**

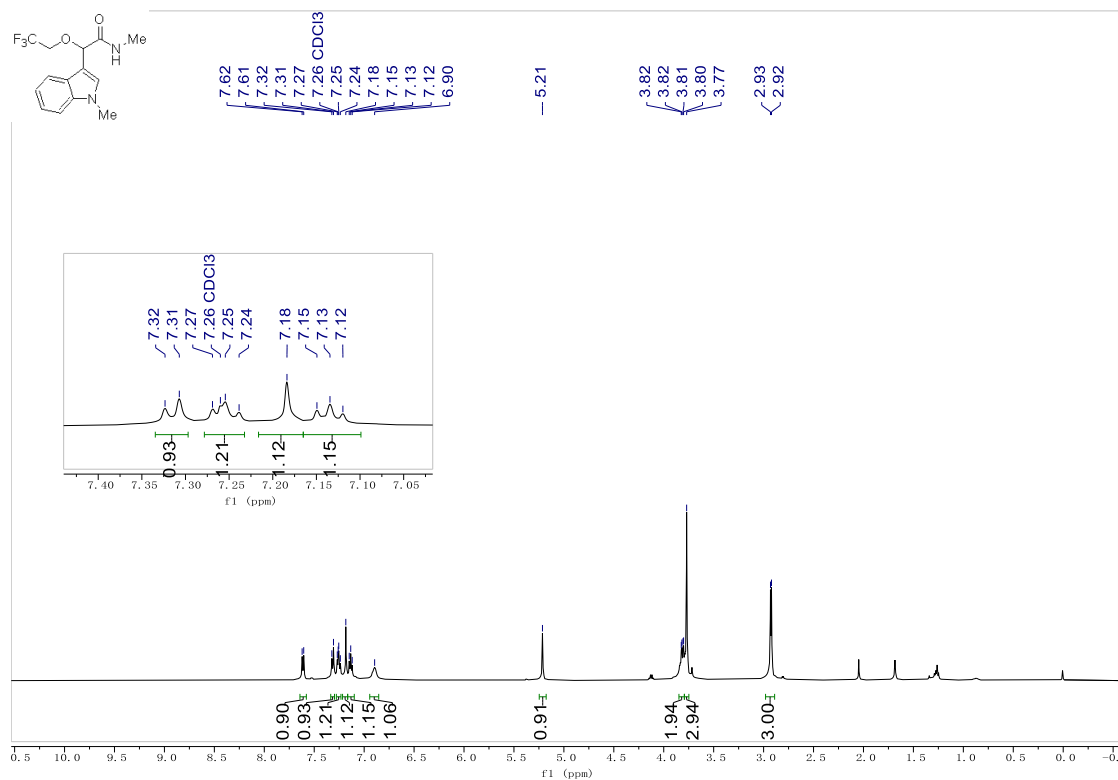

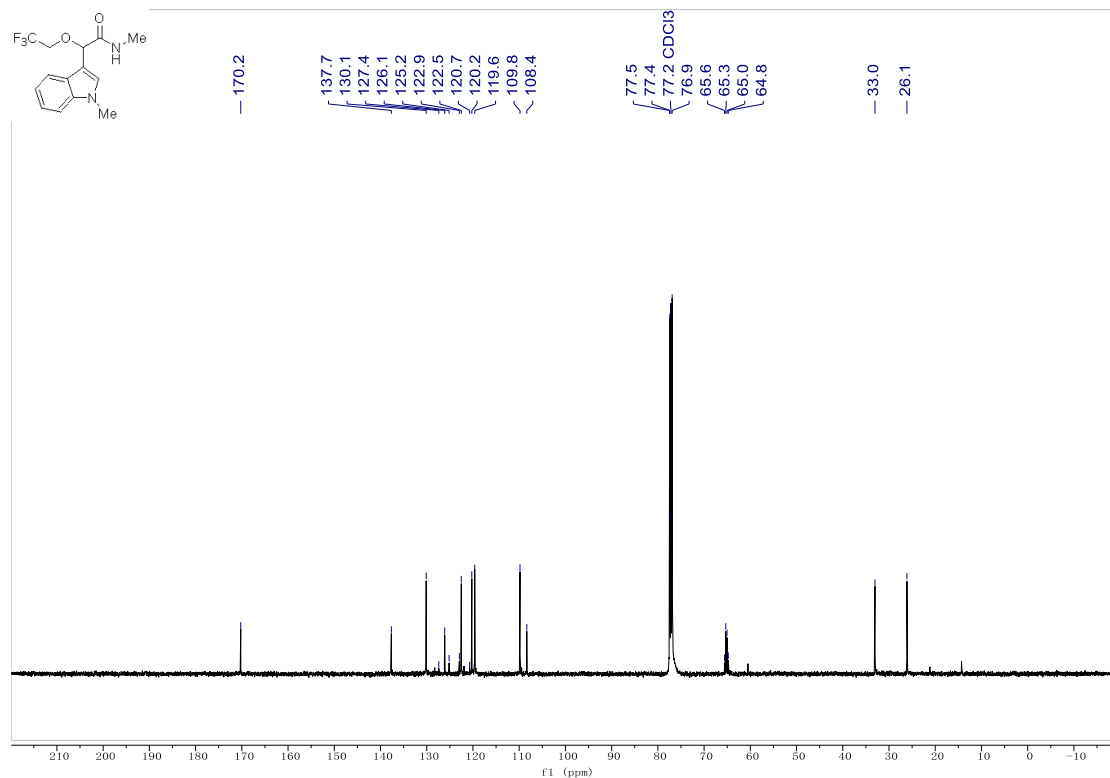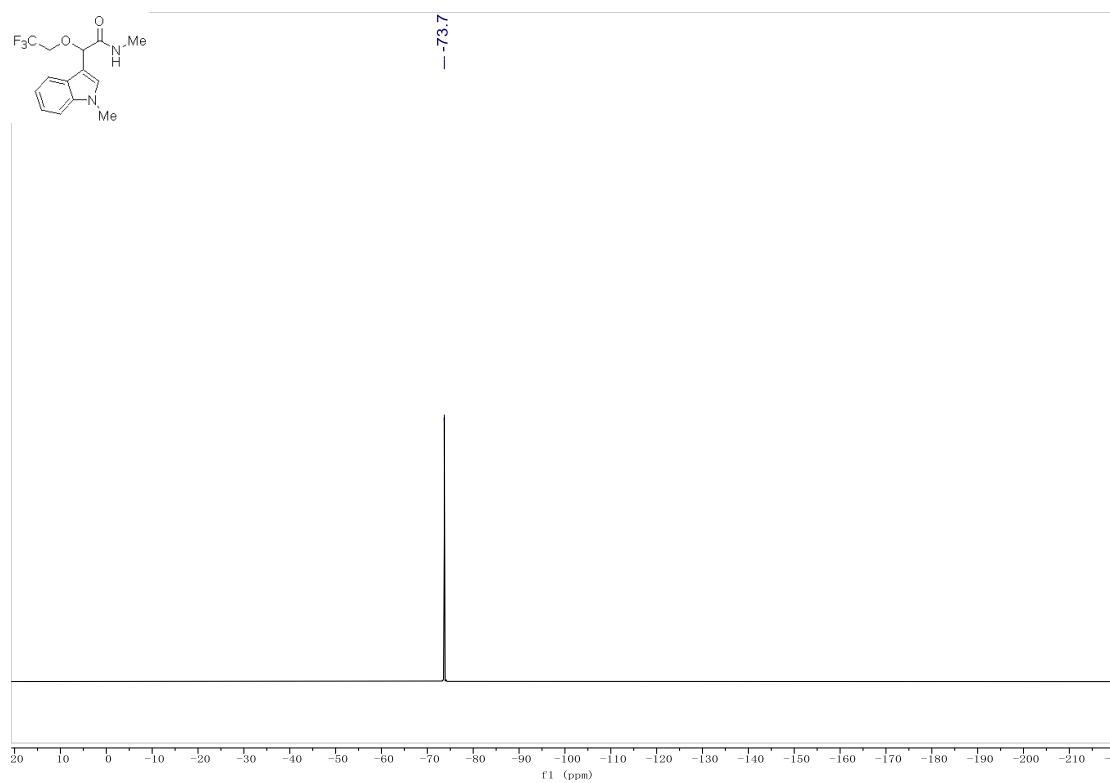

**2-(2-cyclohexylethoxy)-N-methyl-2-(1-methyl-1H-indol-3-yl) acetamide (6q)**

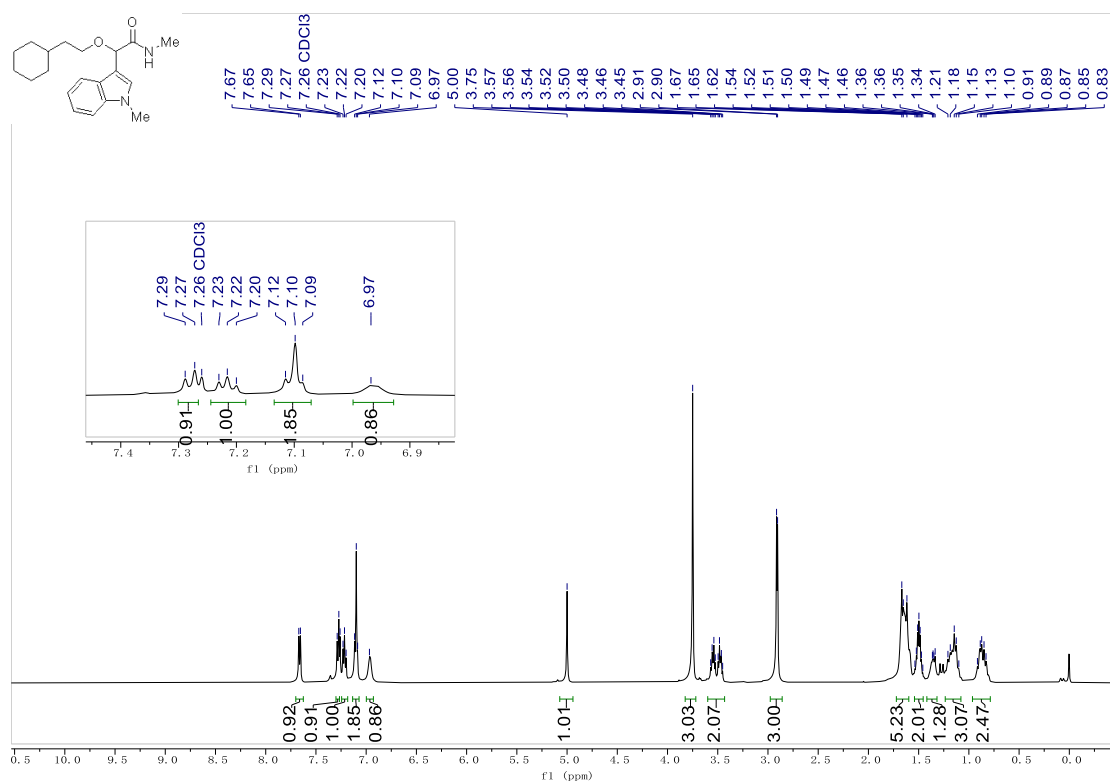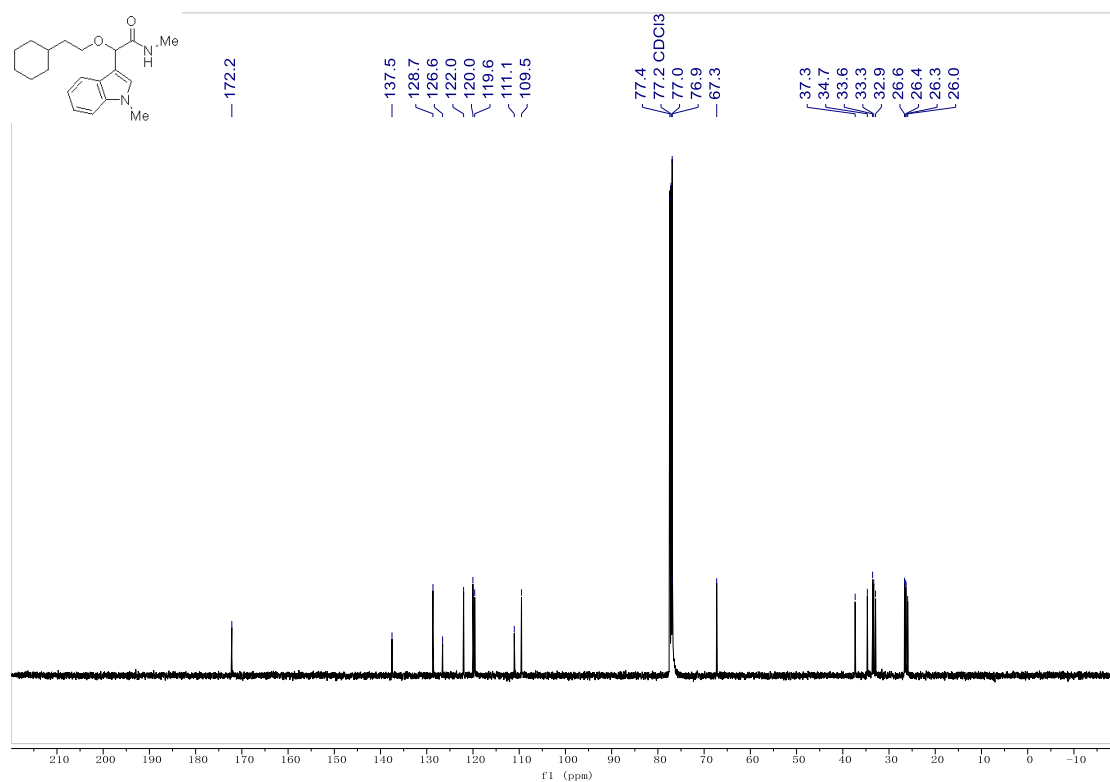



2-(((1*r*,3*r*,5*r*,7*r*)-adamantan-2-yl)oxy)-*N*-methyl-2-(1-methyl-1*H*-indol-3-yl)acetamide (6*r*)

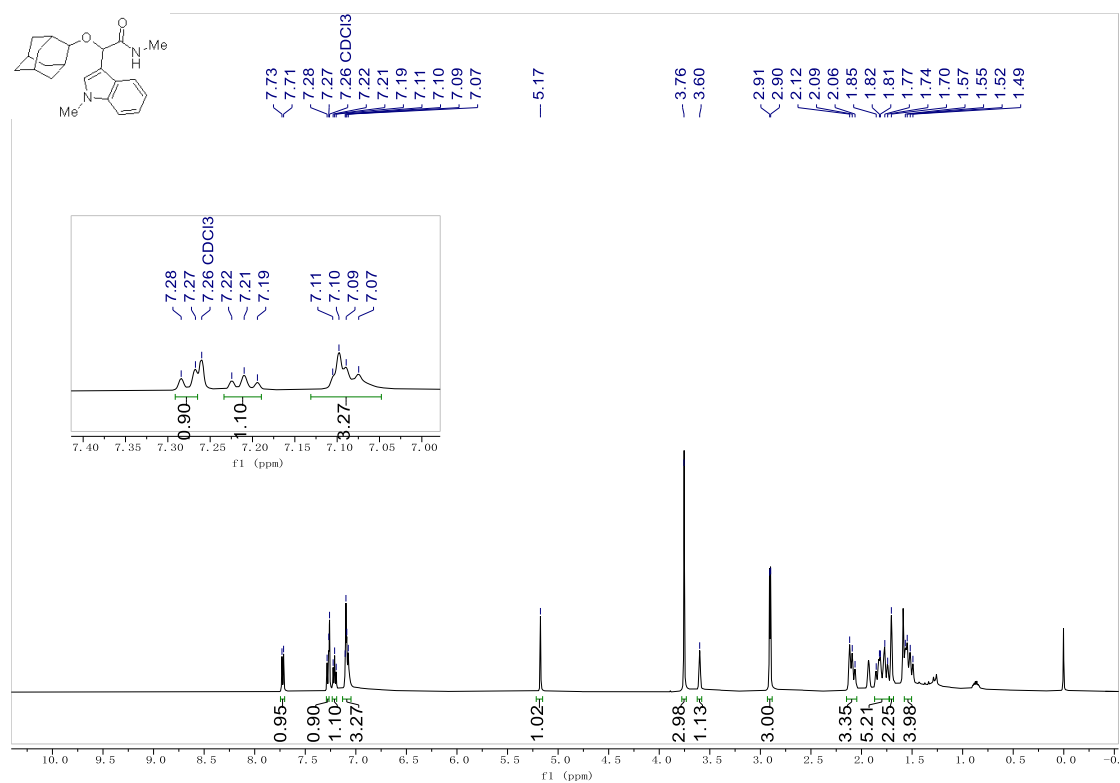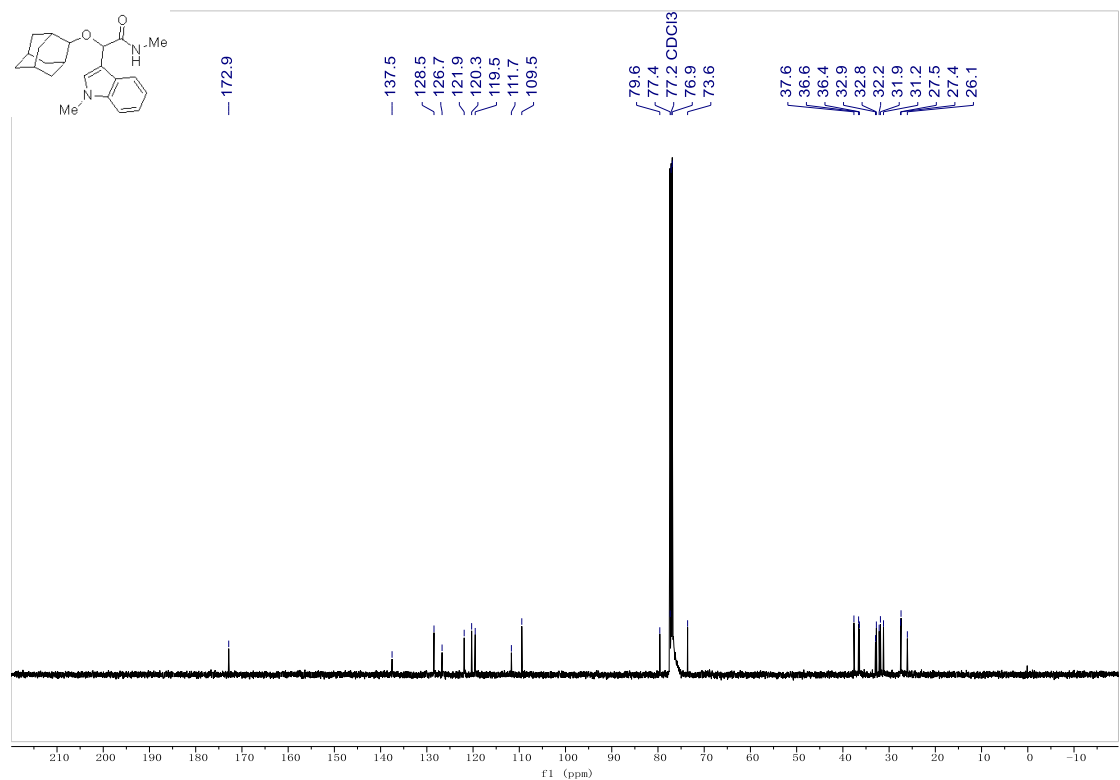

**1-(1-methyl-1*H*-indol-3-yl)-2-(methylamino)-2-oxoethyl benzoate (7a)**

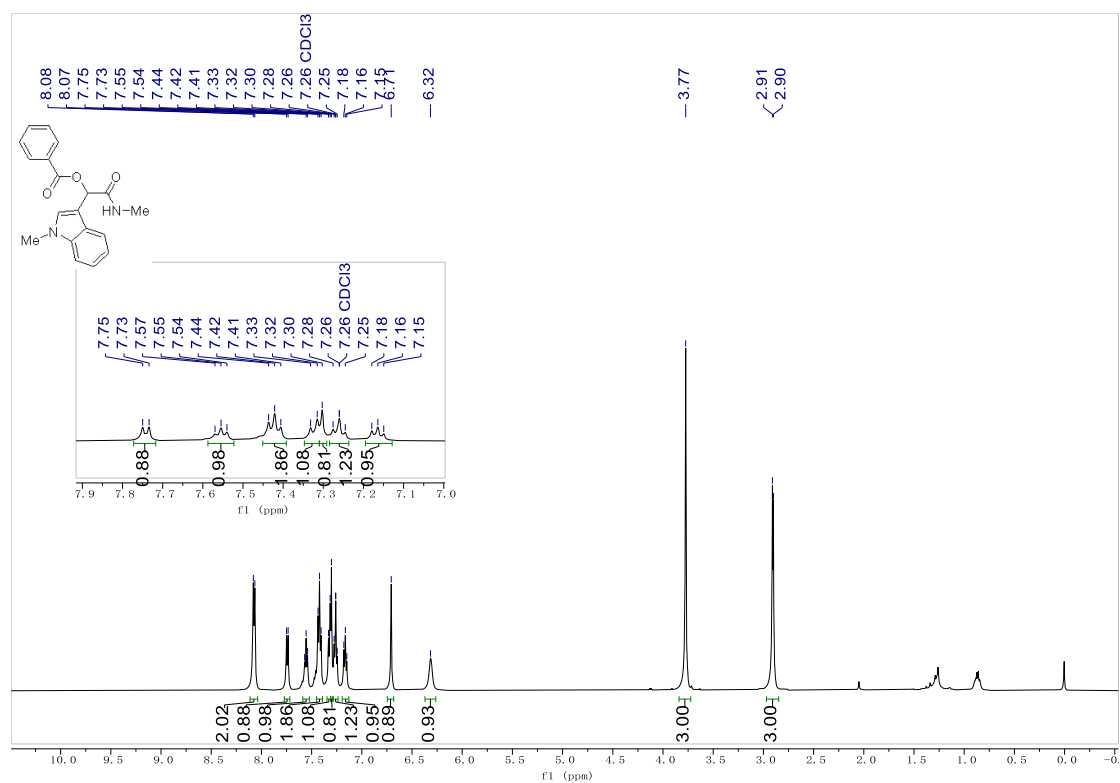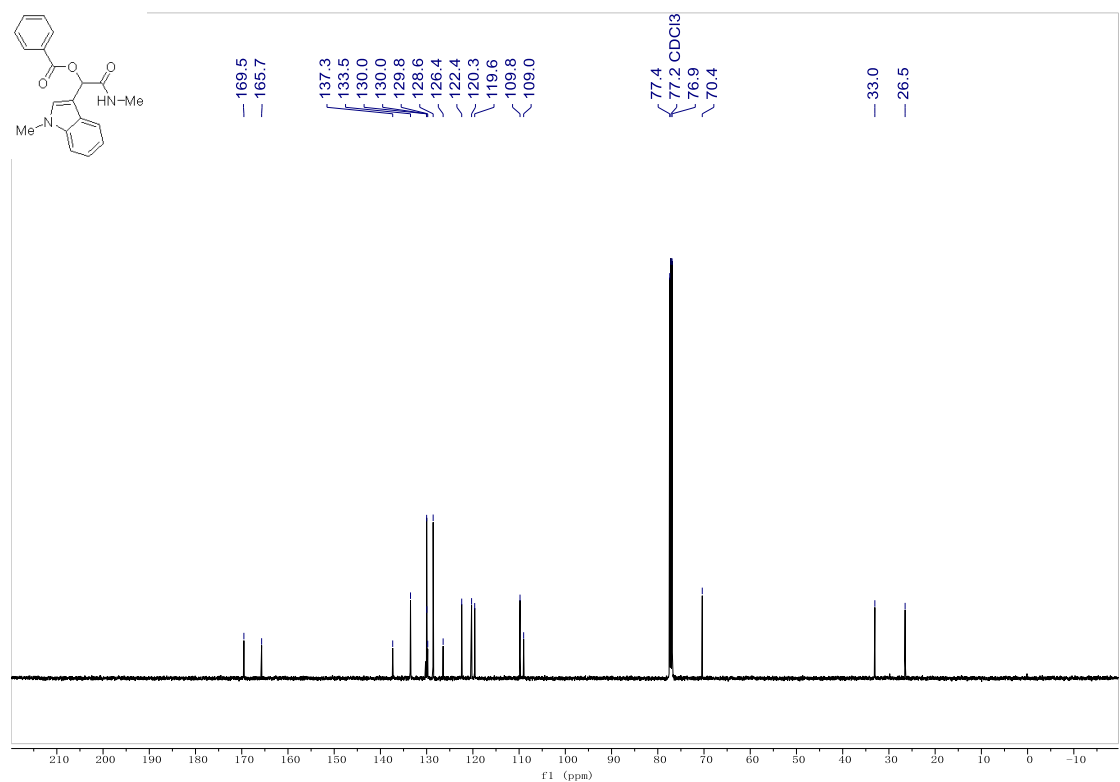

**1-(1-methyl-1*H*-indol-3-yl)-2-(methylamino)-2-oxoethyl 2,4-dimethylbenzoate (7b)**

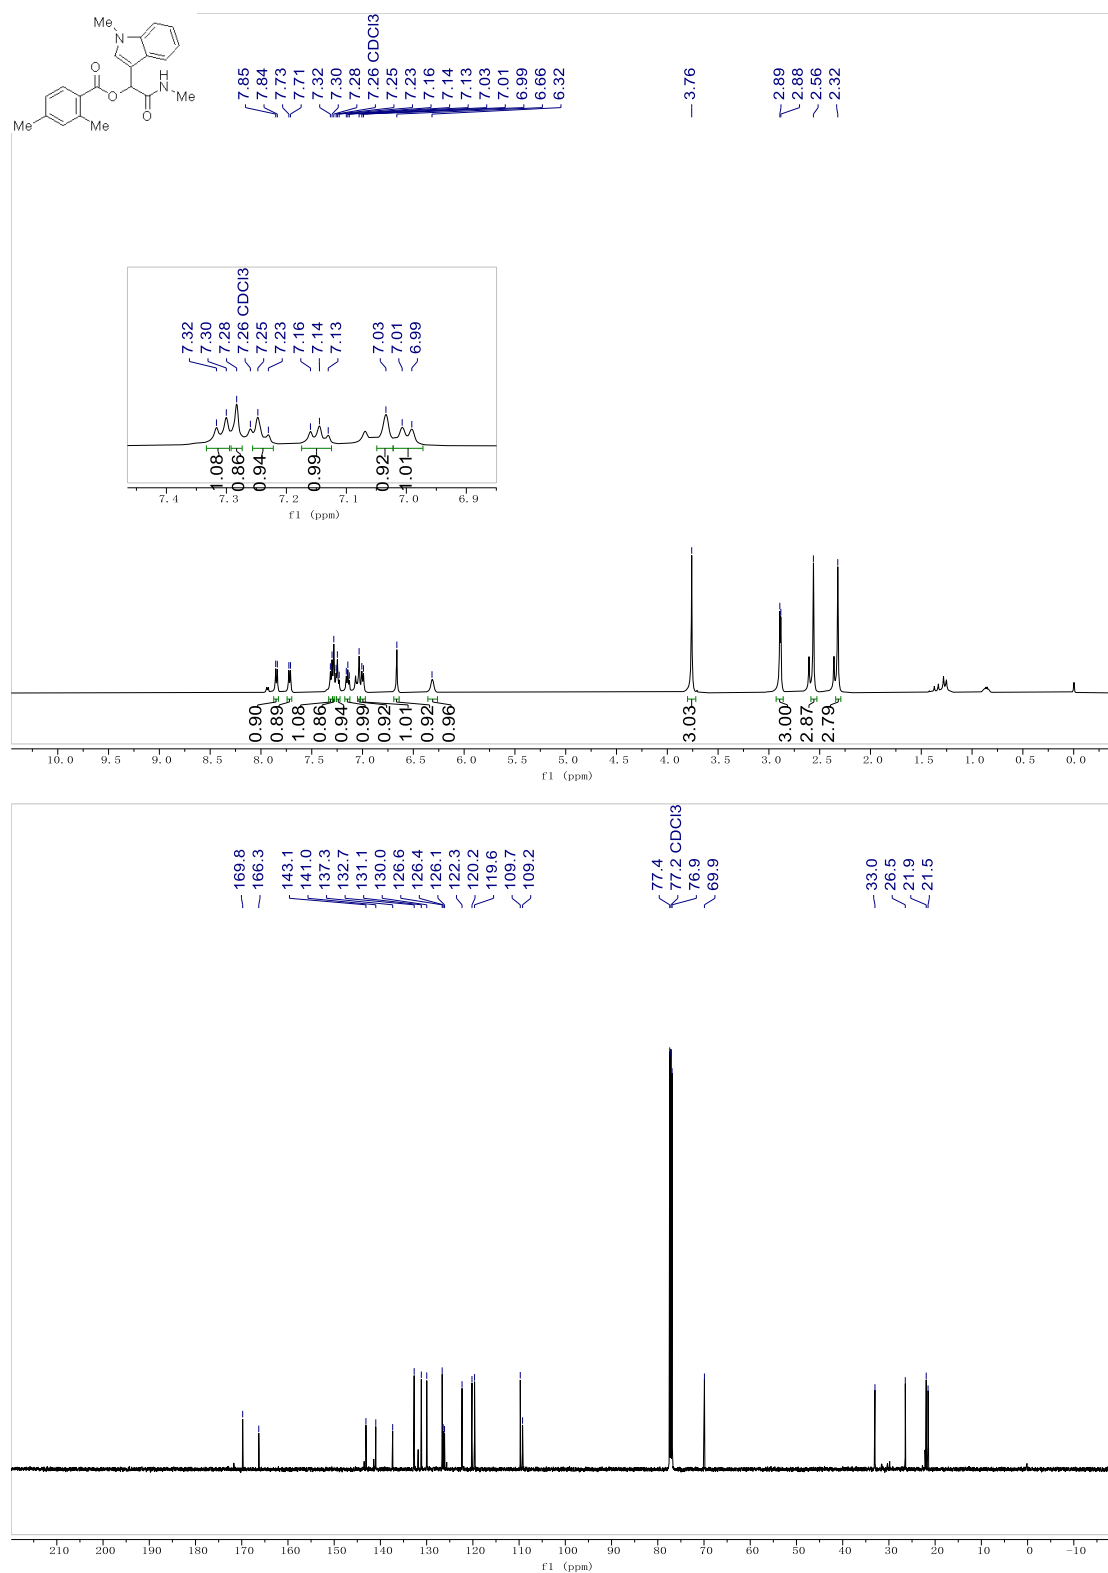

**1-(1-methyl-1*H*-indol-3-yl)-2-(methylamino)-2-oxoethyl 2-naphthoate (7c)**

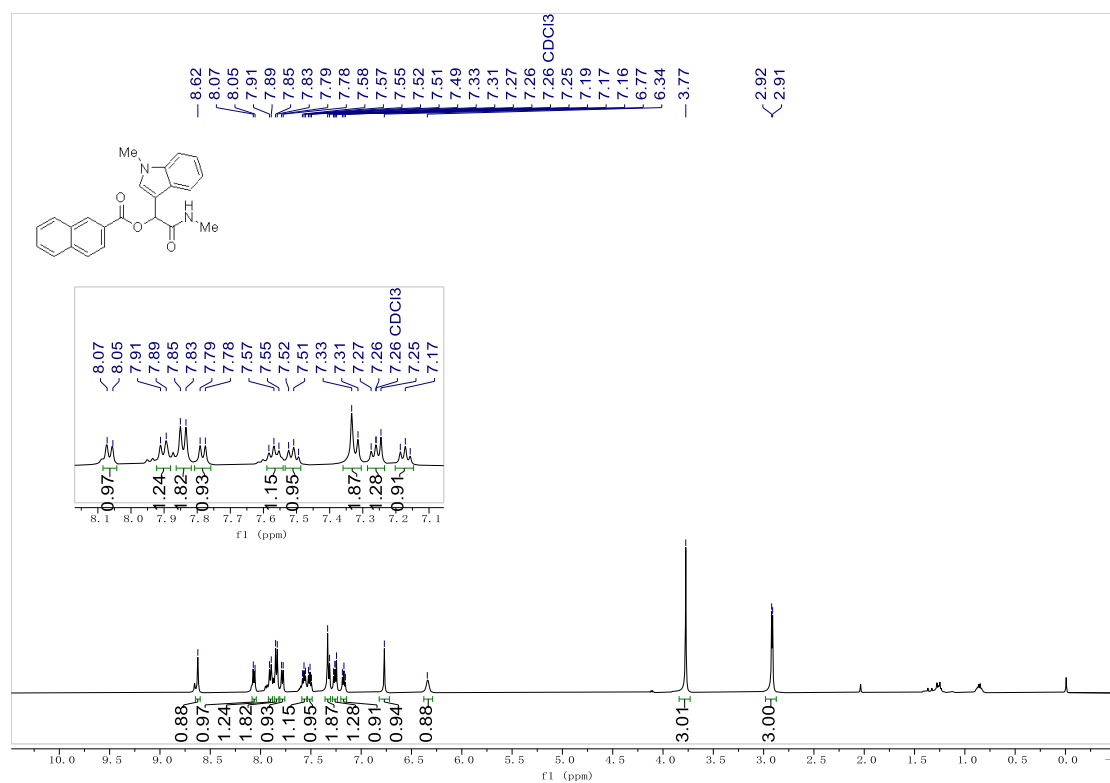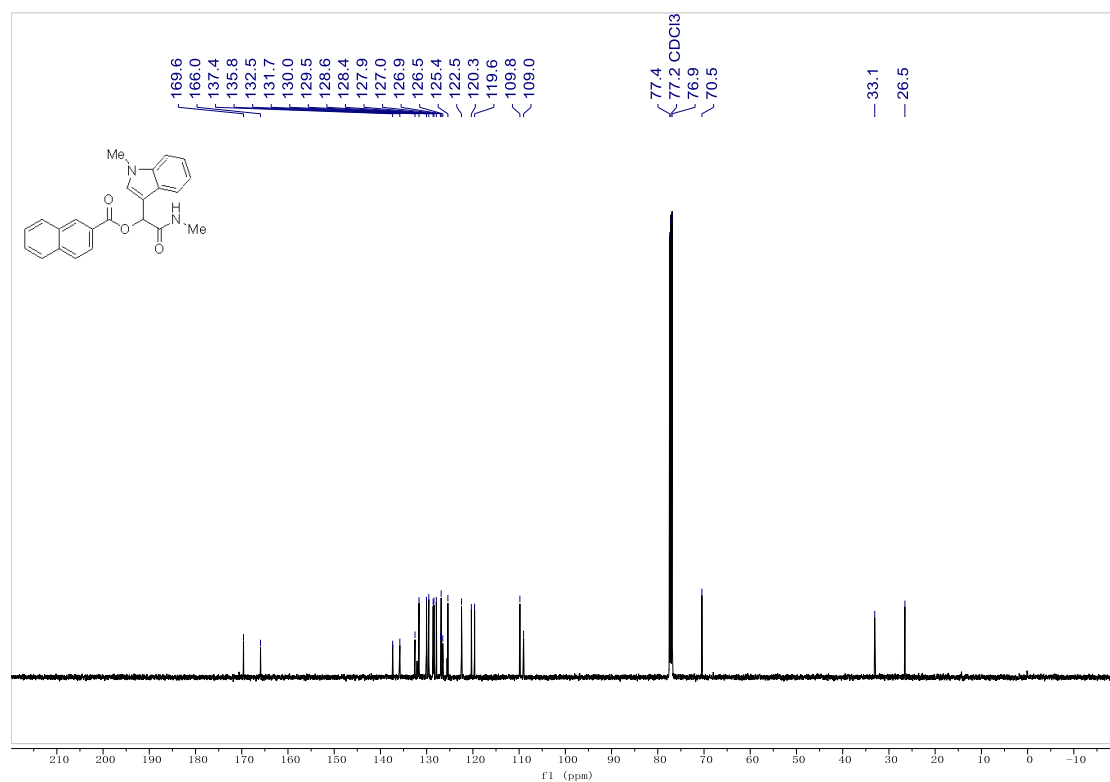

**1-(1-methyl-1H-indol-3-yl)-2-(methylamino)-2-oxoethyl acetate (7d)**

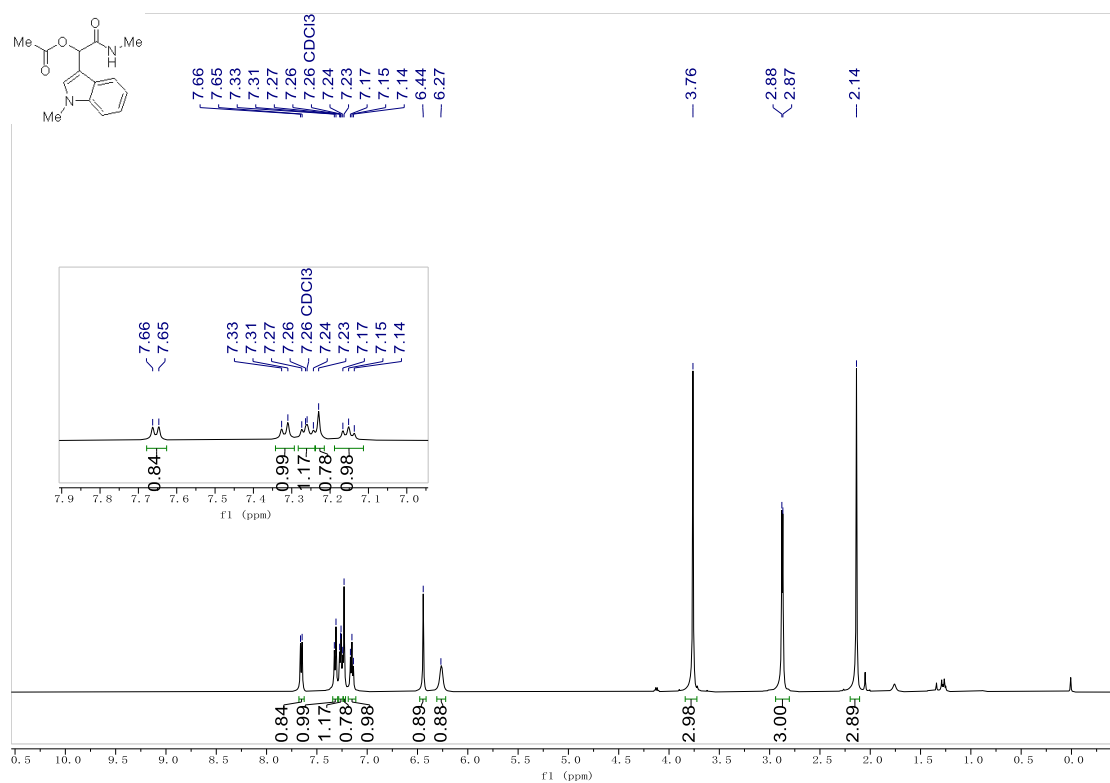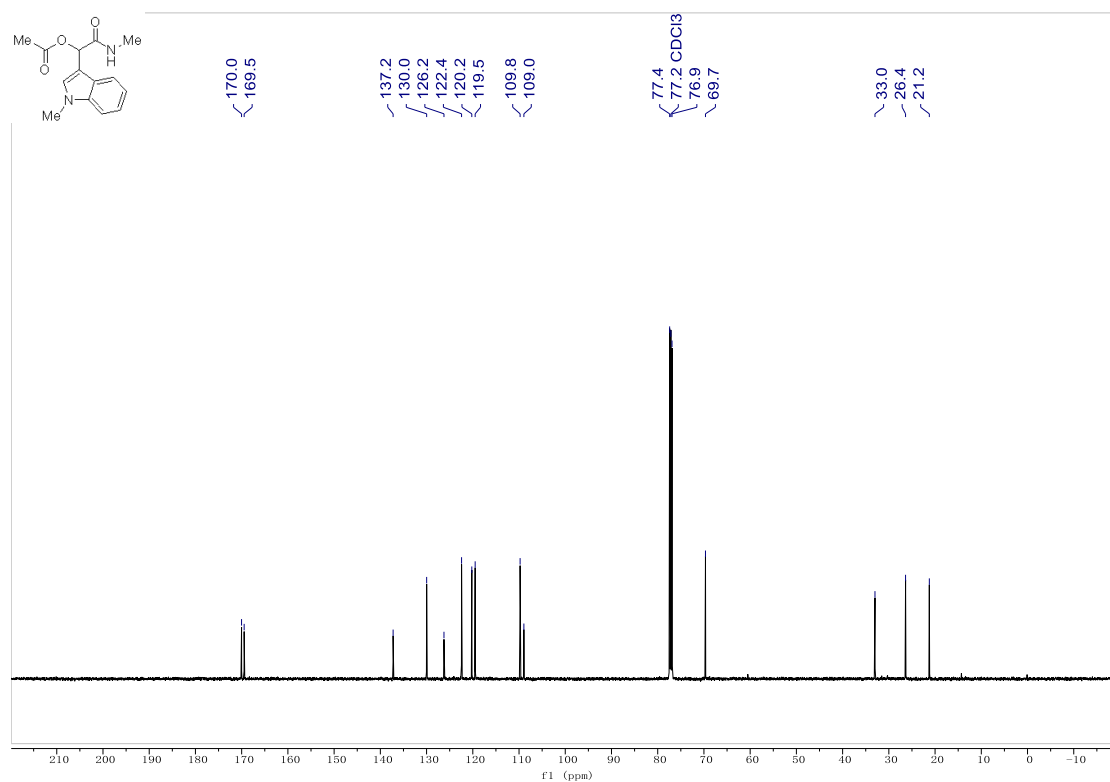

***N*-methyl-2-(1-methyl-1*H*-indol-3-yl)-2-(propylthio)acetamide (8a)**

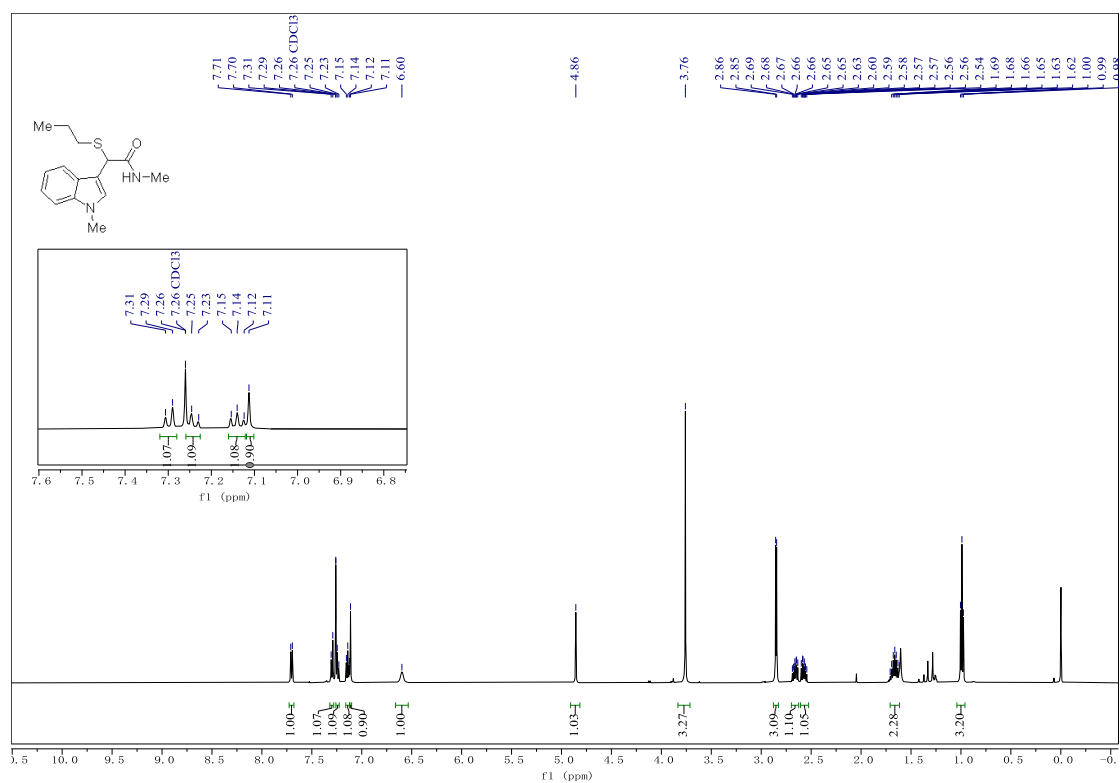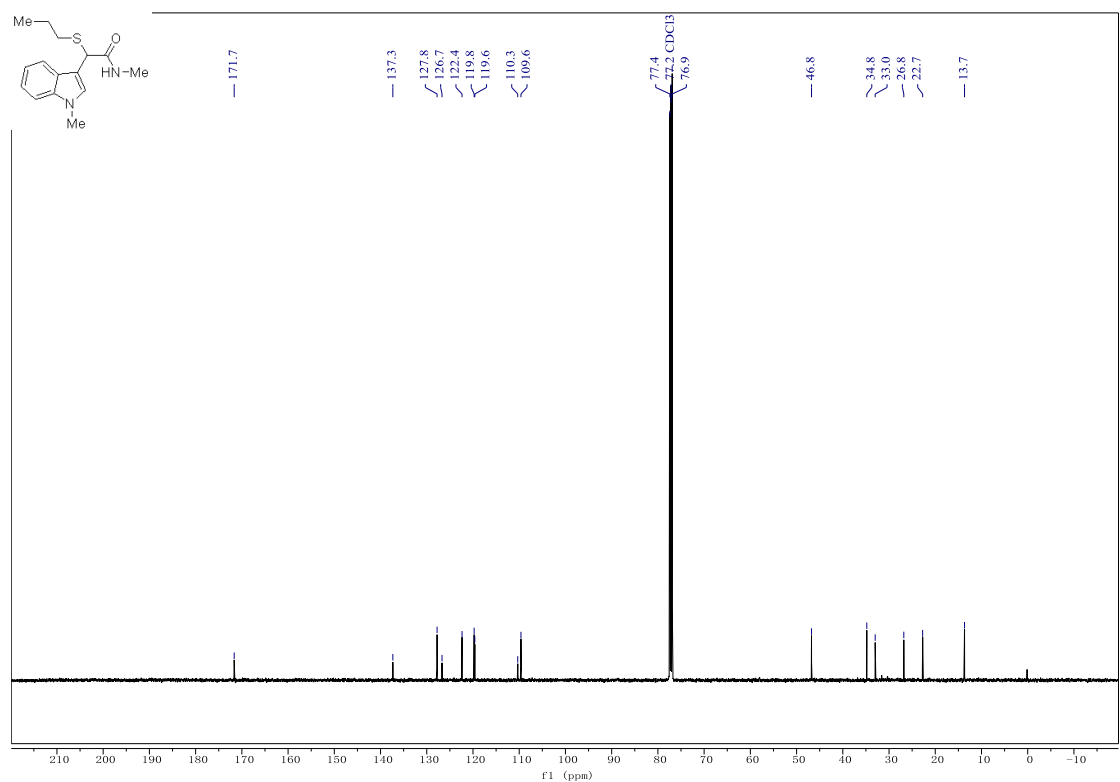

***N*-methyl-2-(1-methyl-1*H*-indol-3-yl)-2-(octylthio)acetamide (8b)**

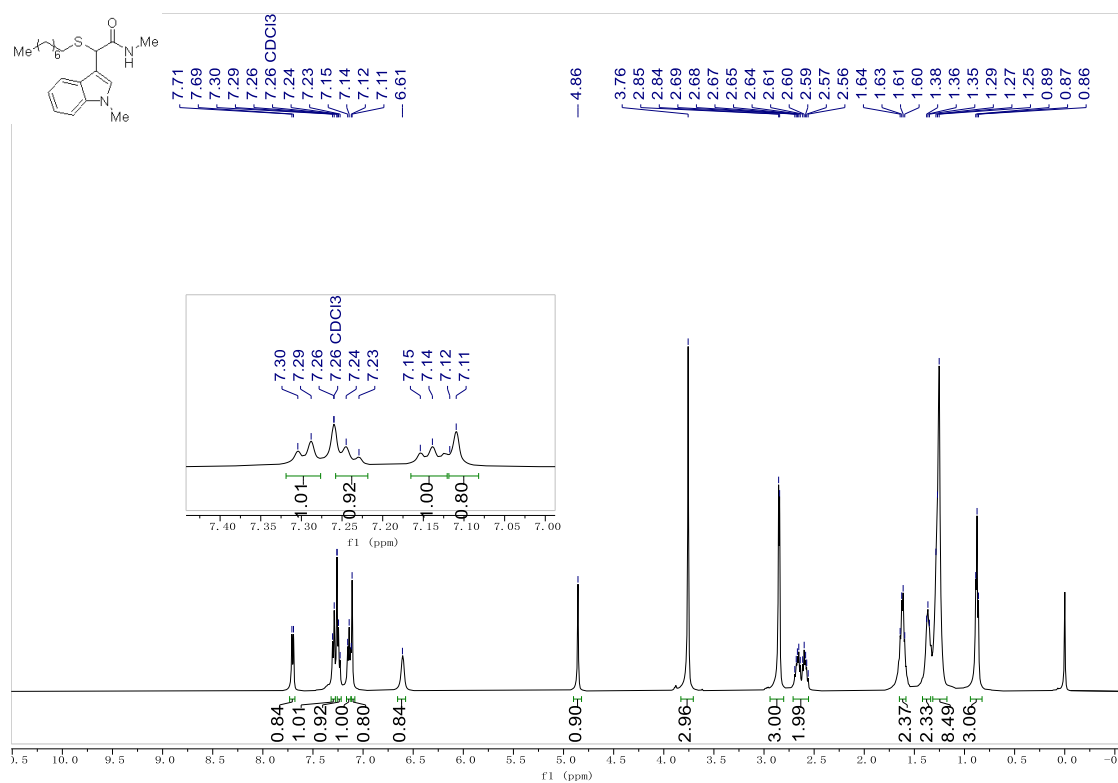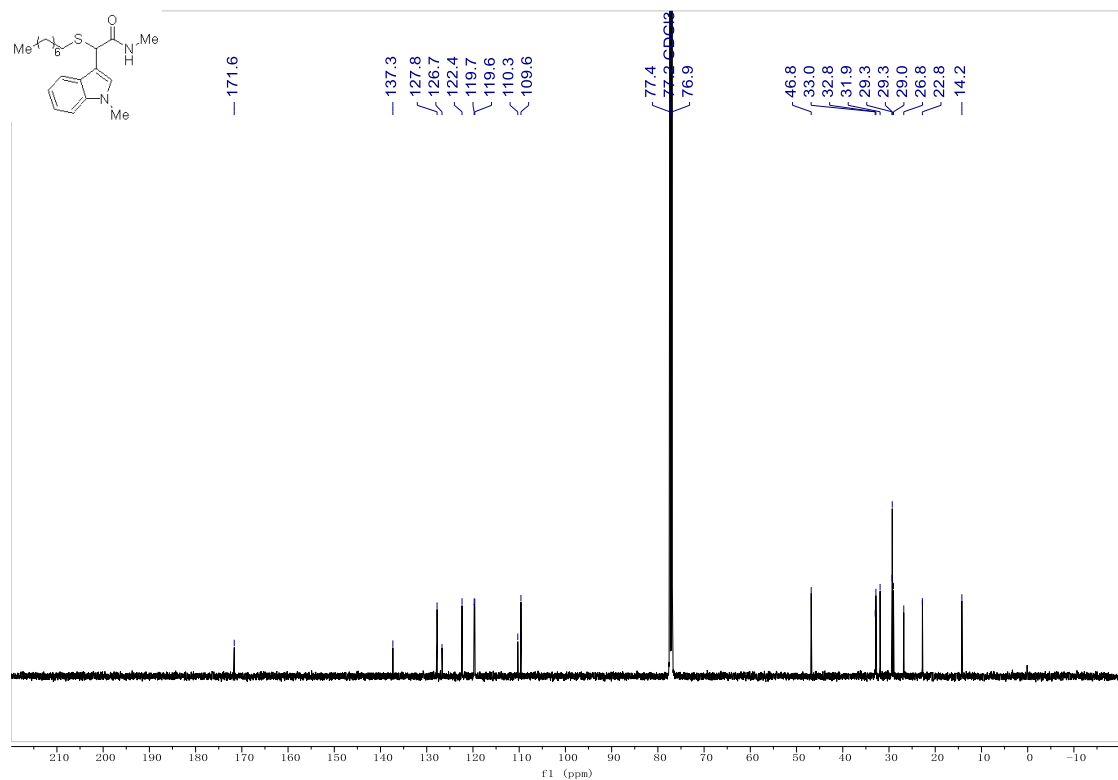

**Ethyl-4-((1-(1-methyl-1H-indol-3-yl)-2-(methylamino)-2-oxoethyl)amino)benzoate (10a)**

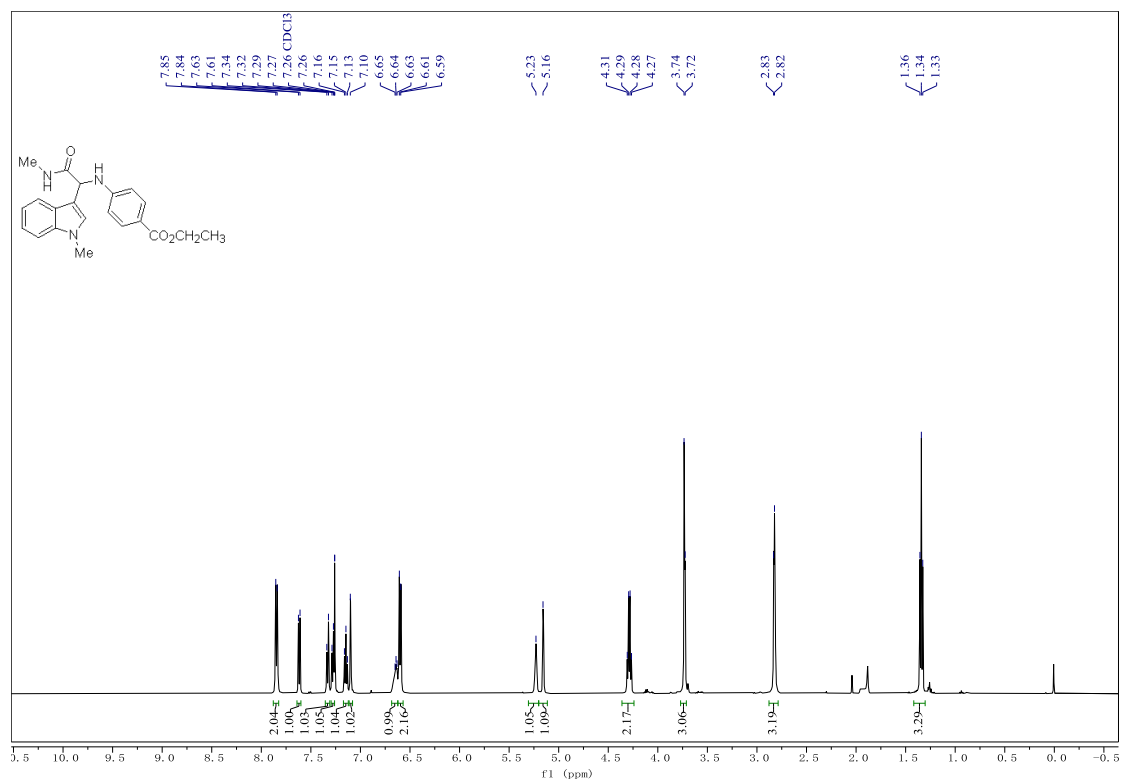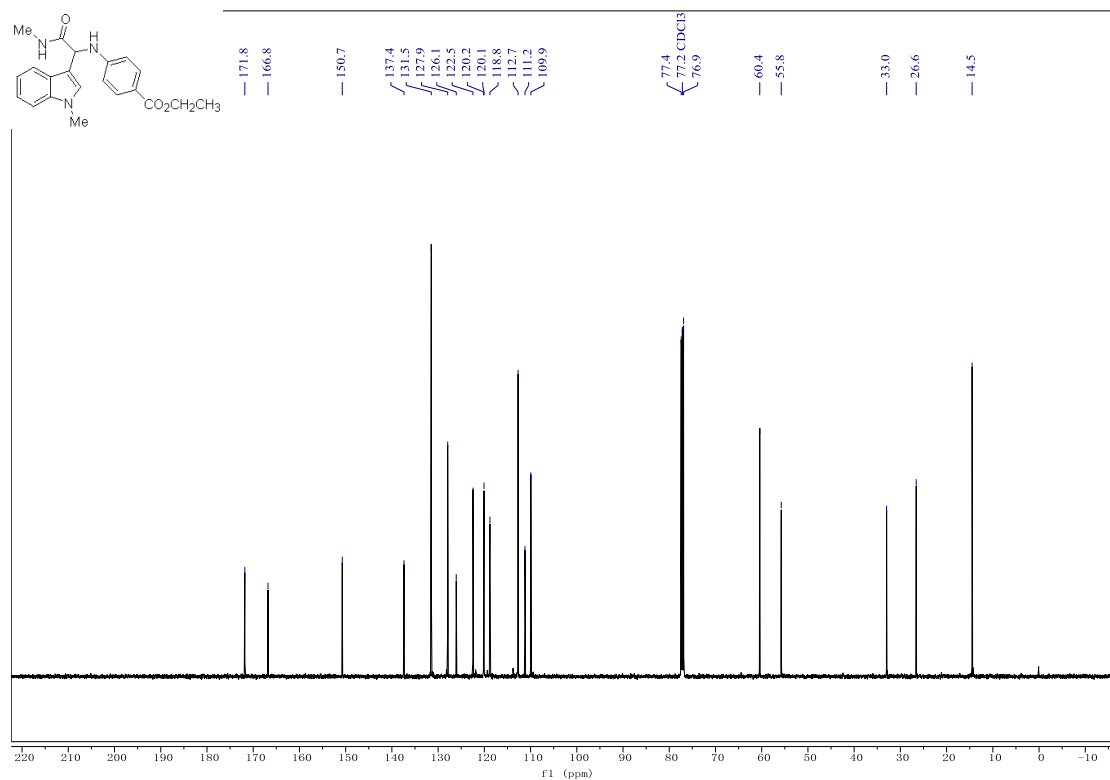



**2-(((1*r*,3*R*,5*S*,7*r*)-3,5-dimethyladamantan-1-yl)amino)-*N*-methyl-2-(1-methyl-1*H*-indol-2-yl)acetamide (10b)**

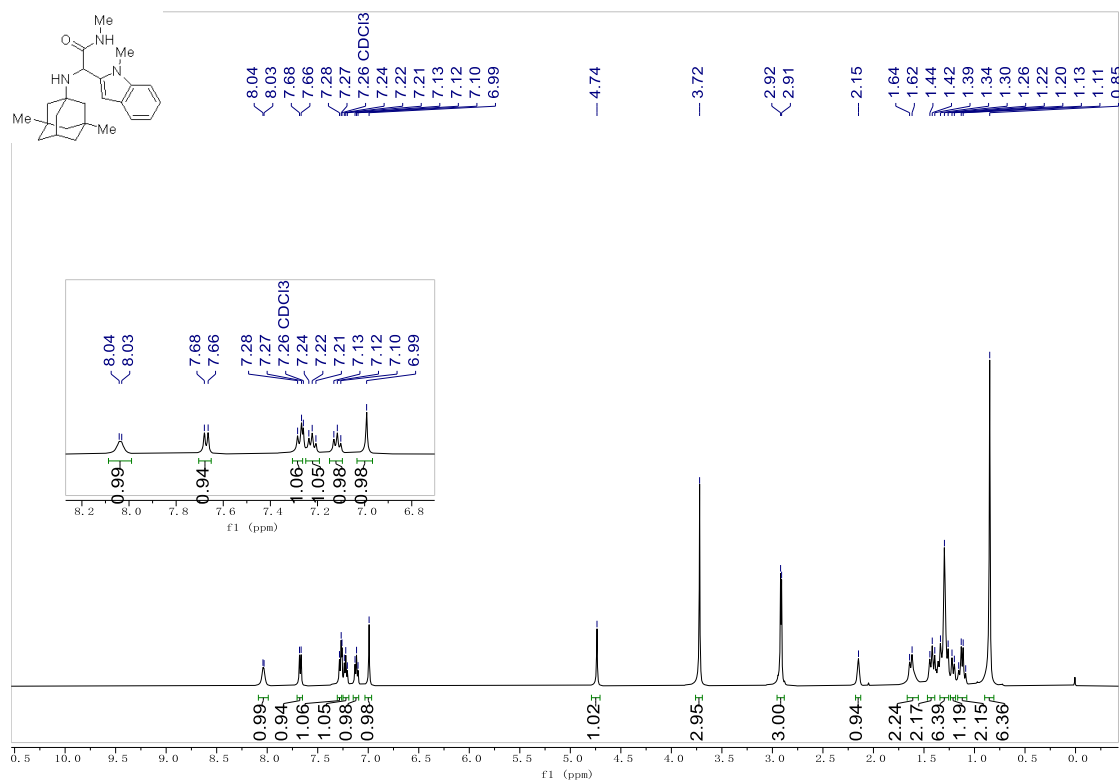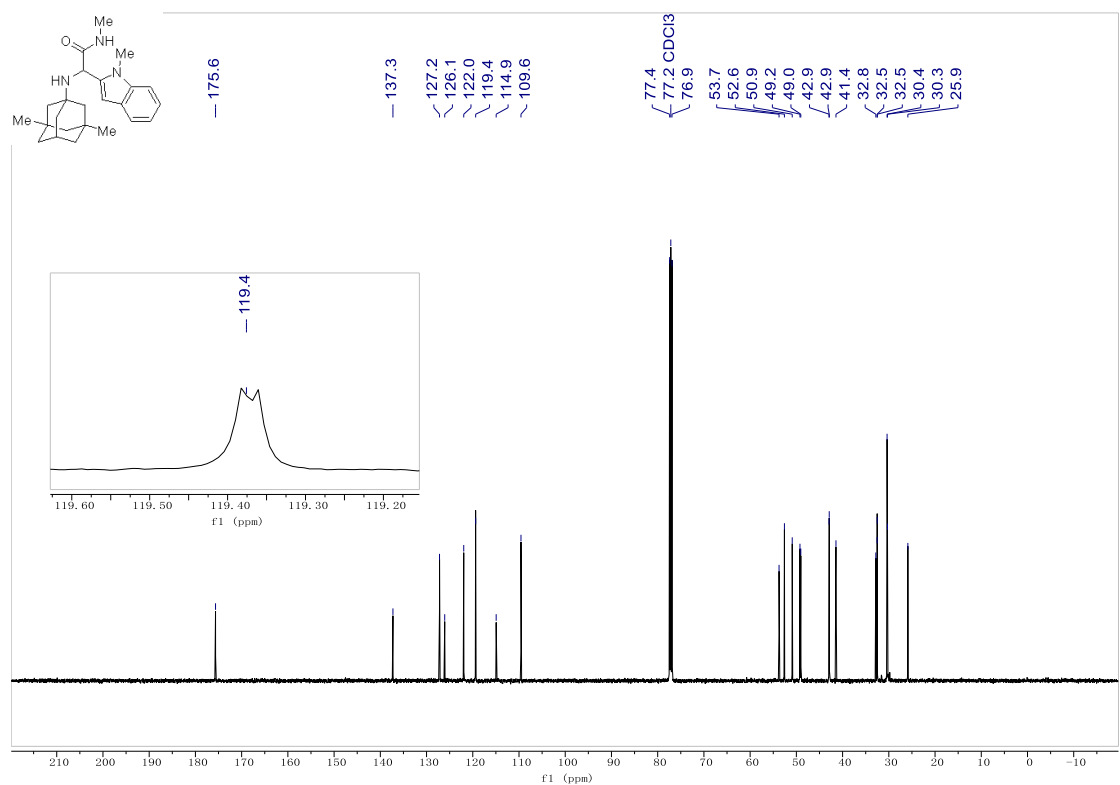

**2-(4-acetamidophenoxy)-*N*-methyl-2-(1-methyl-1*H*-indol-3-yl)acetamide (10c)**

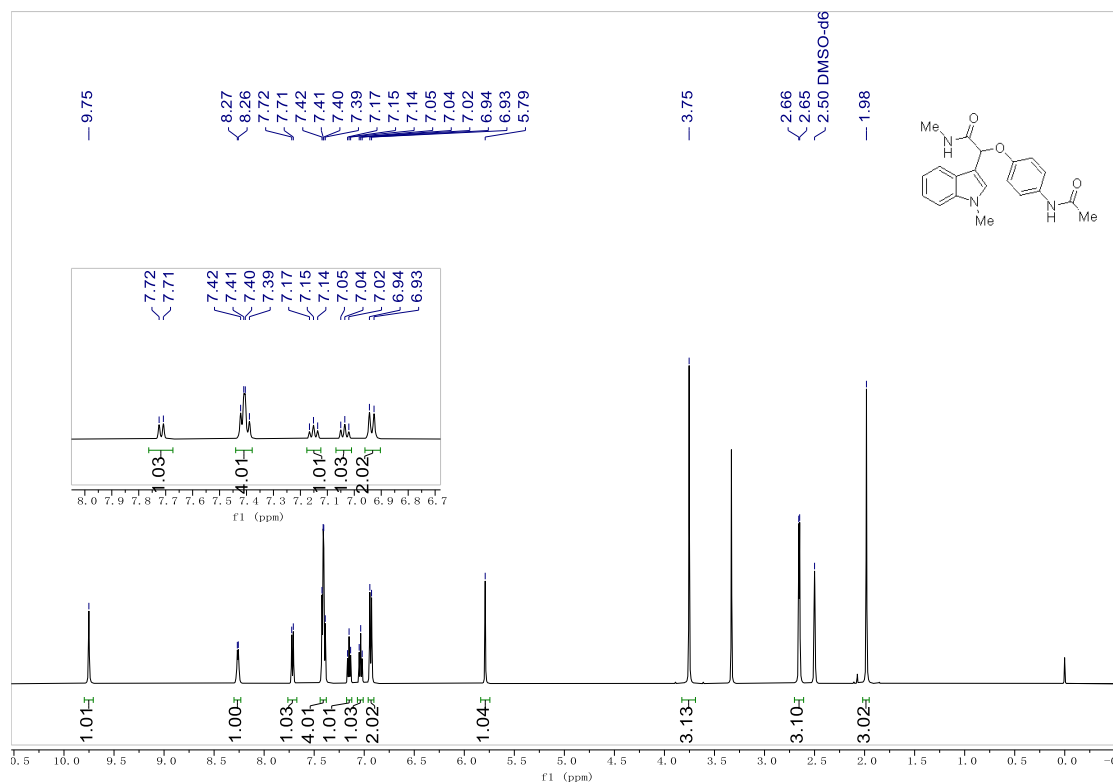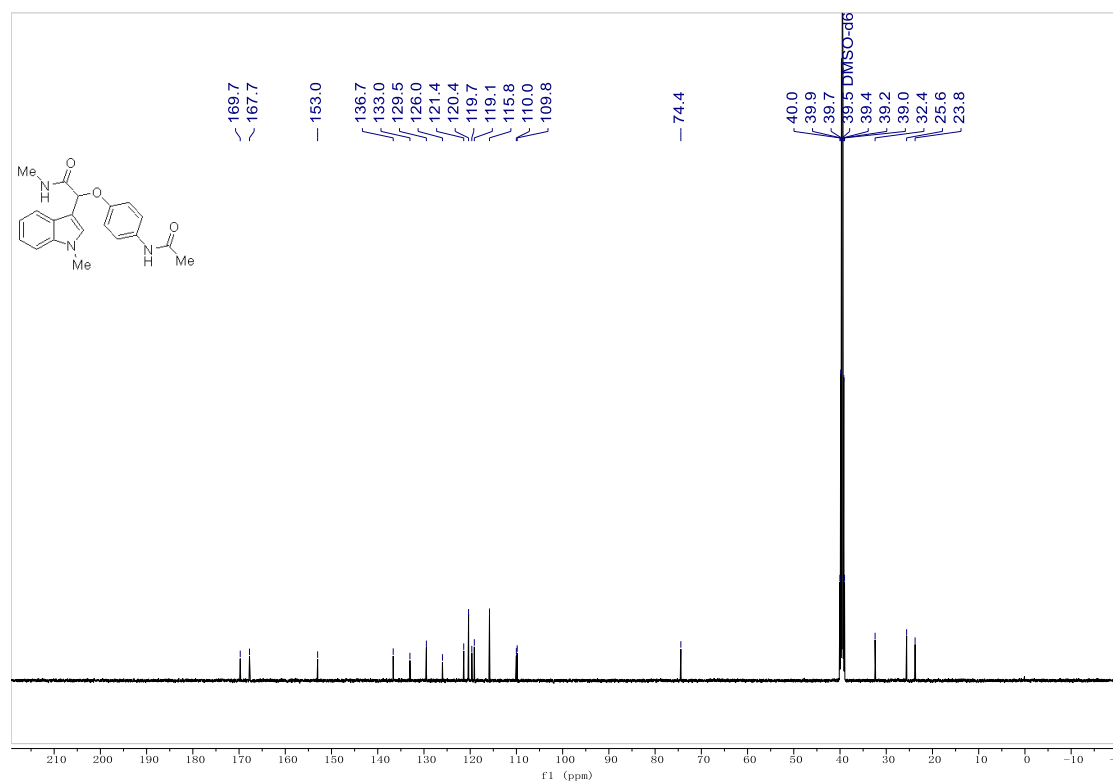

**2-(benzo[d][1,3]dioxol-5-ylmethoxy)-*N*-methyl-2-(1-methyl-1*H*-indol-3-yl)acetamide (10d)**

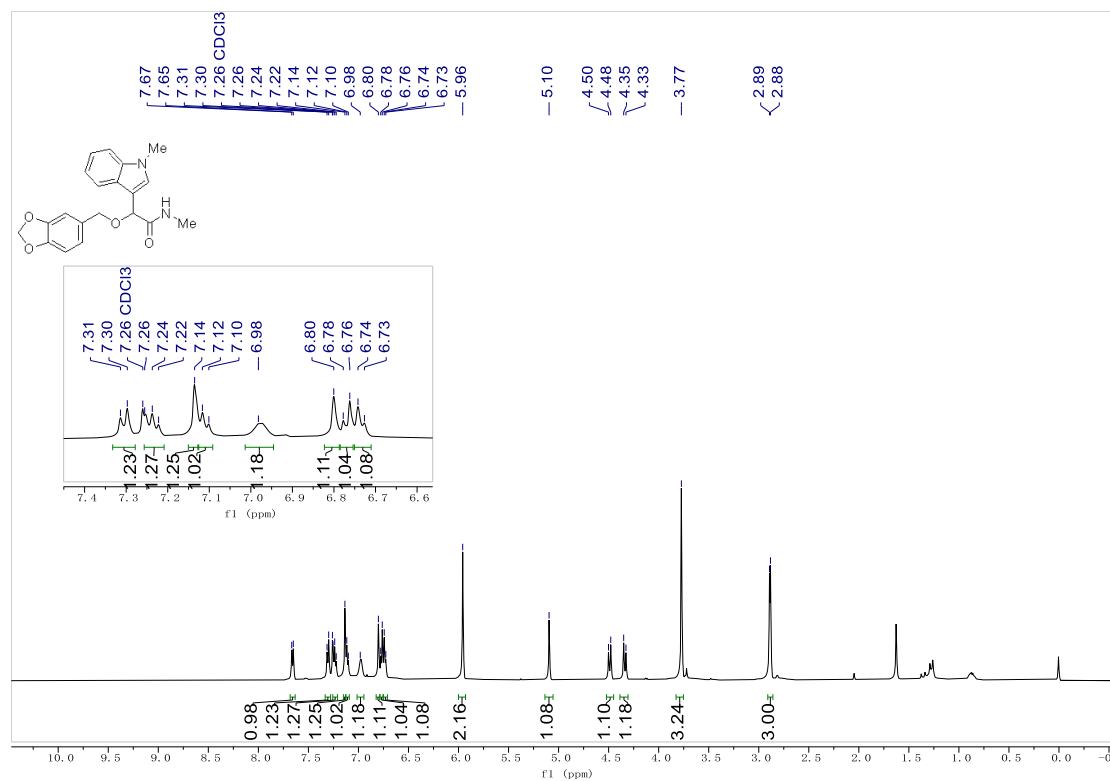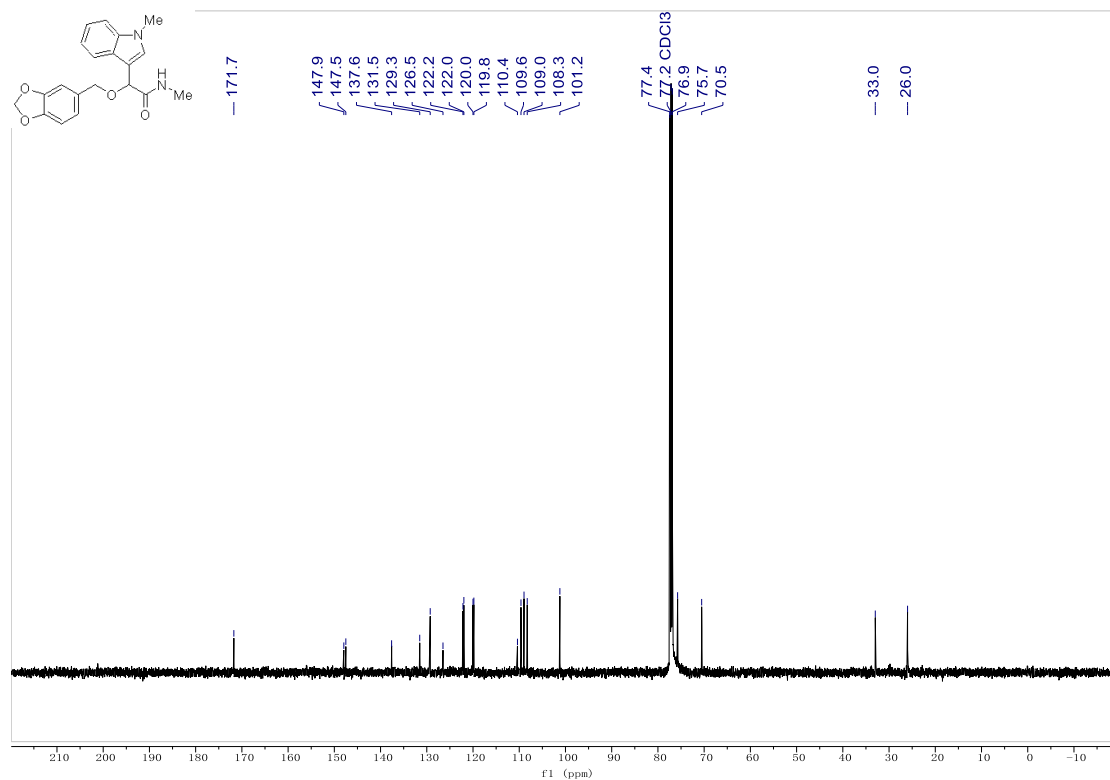

**(E)-2-((3,7-dimethylocta-2,6-dien-1-yl)oxy)-N-methyl-2-(1-methyl-1H-indol-3-yl)acetamide (10e)**

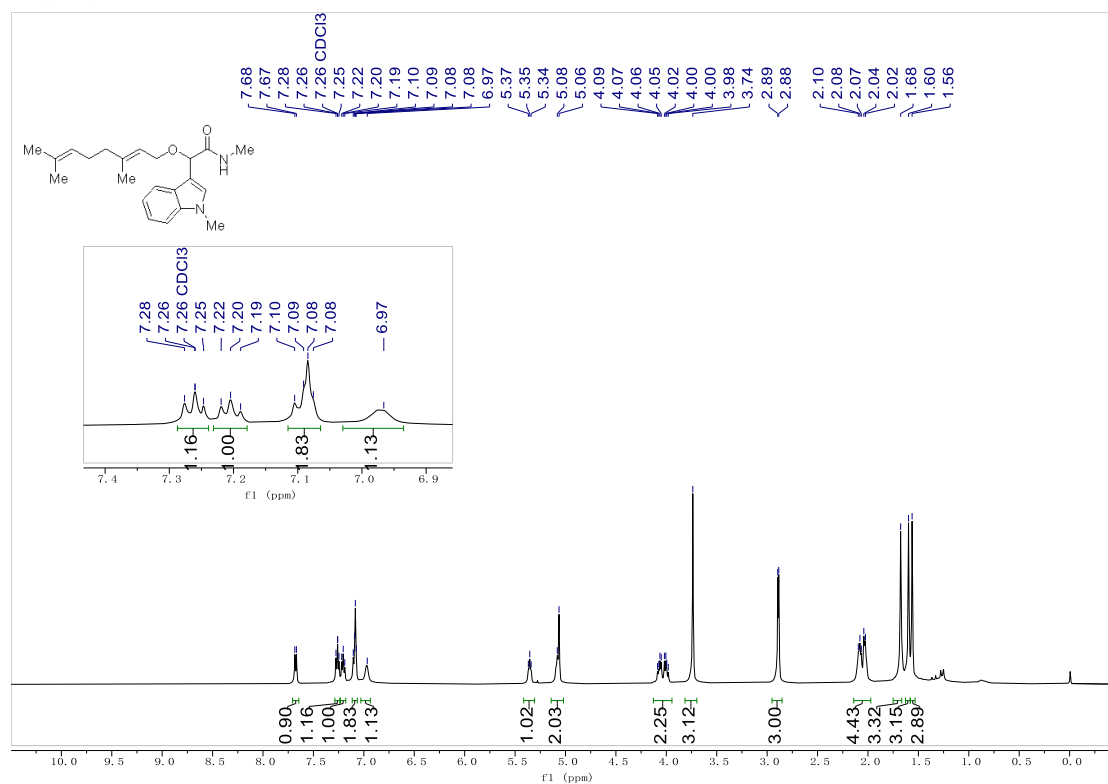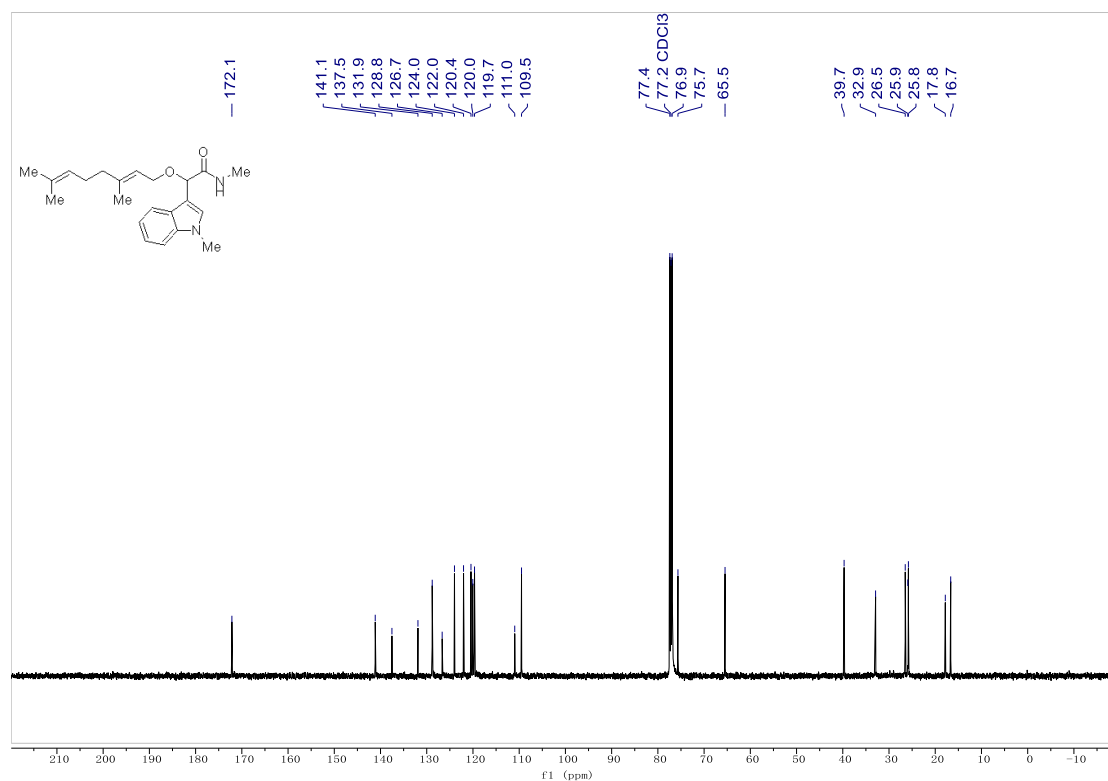

**1-(1-methyl-1*H*-indol-3-yl)-2-(methylamino)-2-oxoethyl nicotinate (10f)**

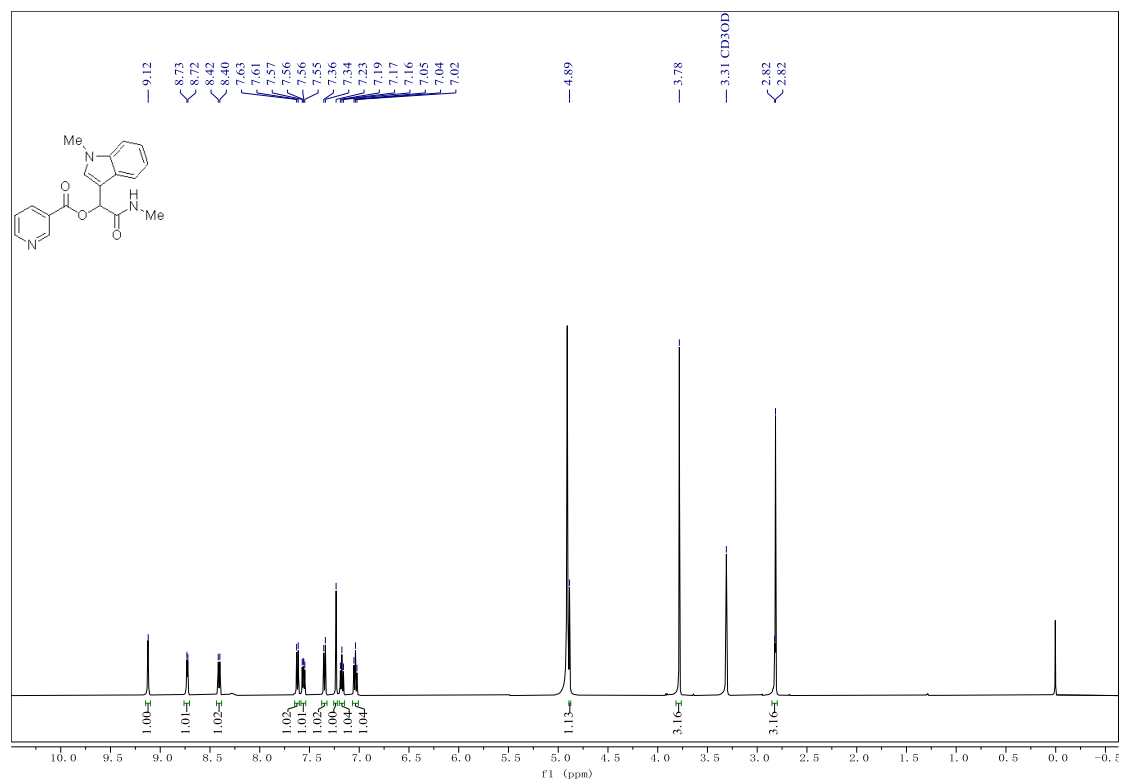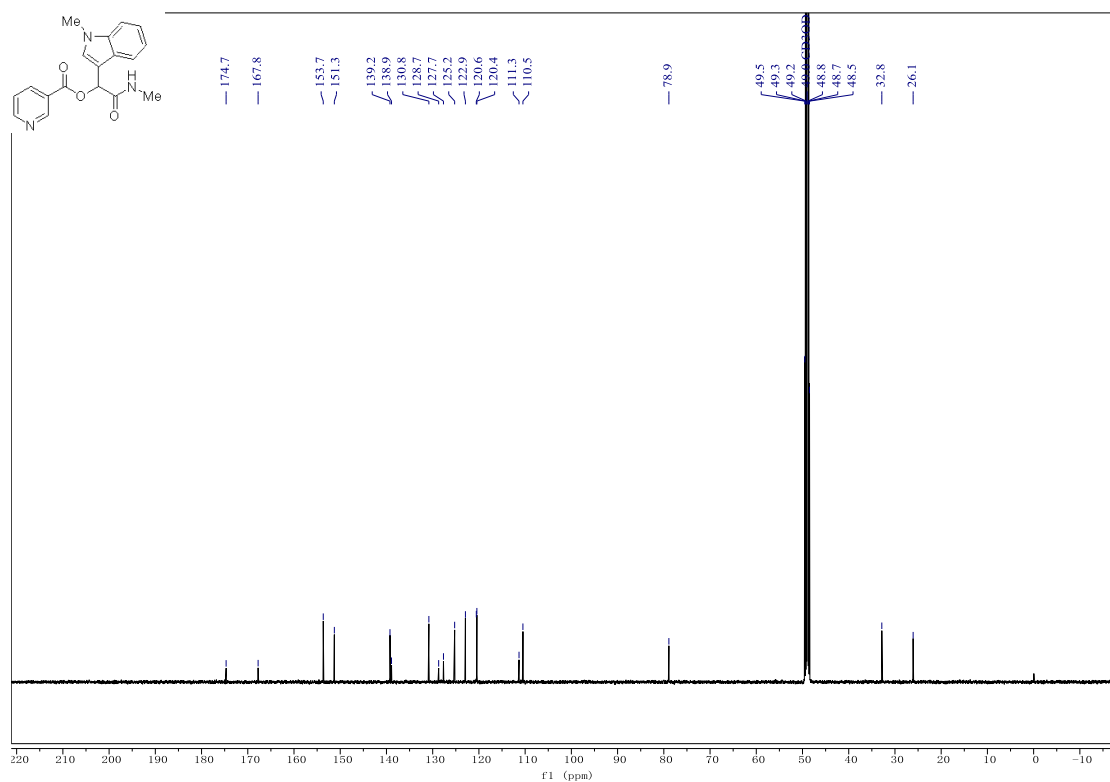

**1-(1-methyl-1H-indol-3-yl)-2-(methylamino)-2-oxoethyl acetylglycinate (10g)**

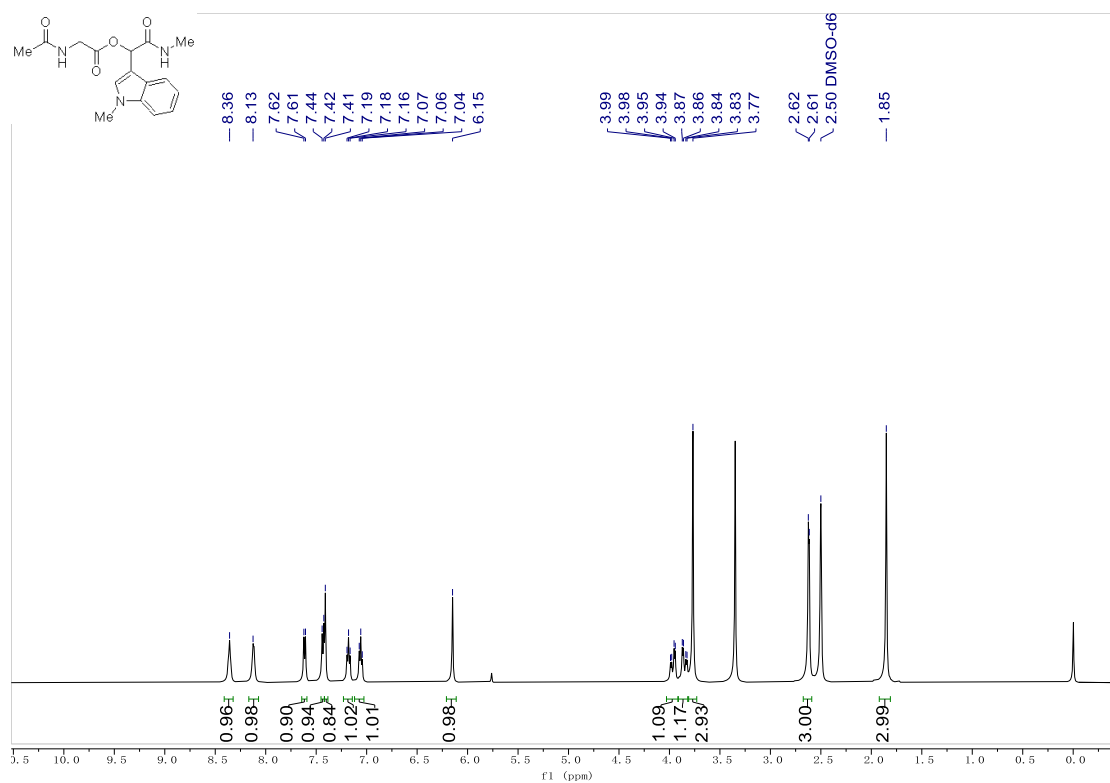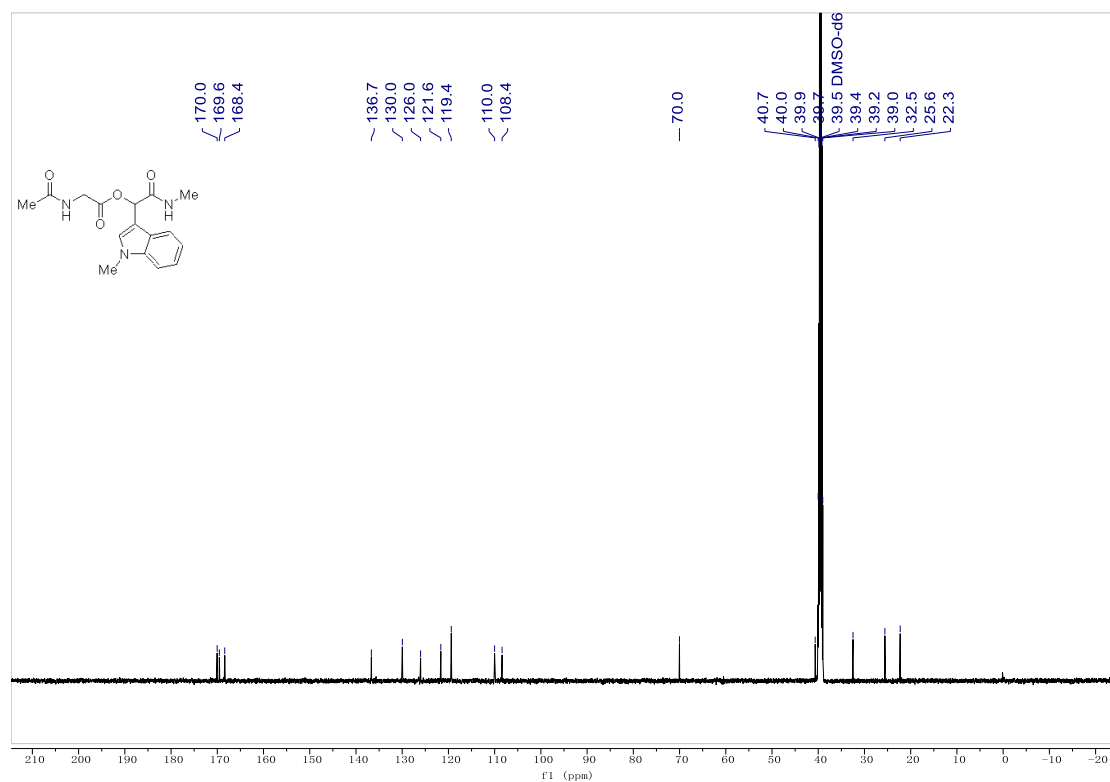

**2-(1-(4-chlorobenzoyl)-5-methoxy-2-methyl-1*H*-indol-3-yl)-2-((4-isopropylphenyl)amino)-*N*-methylacetamide (10h)**

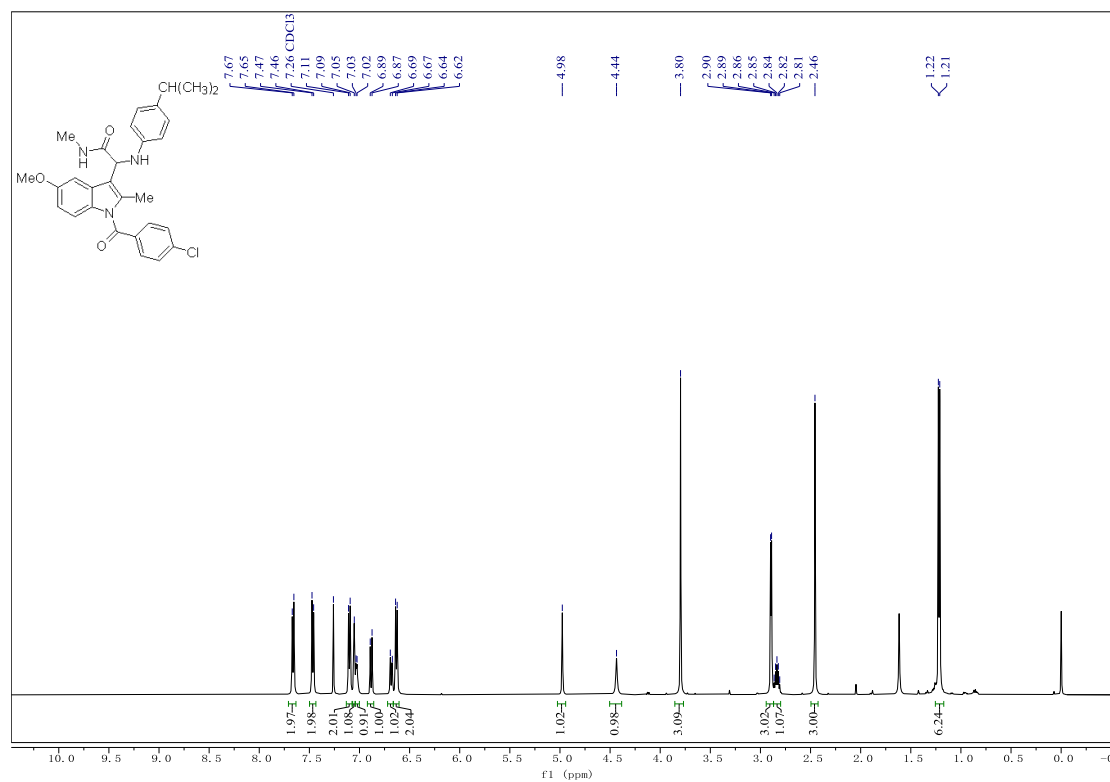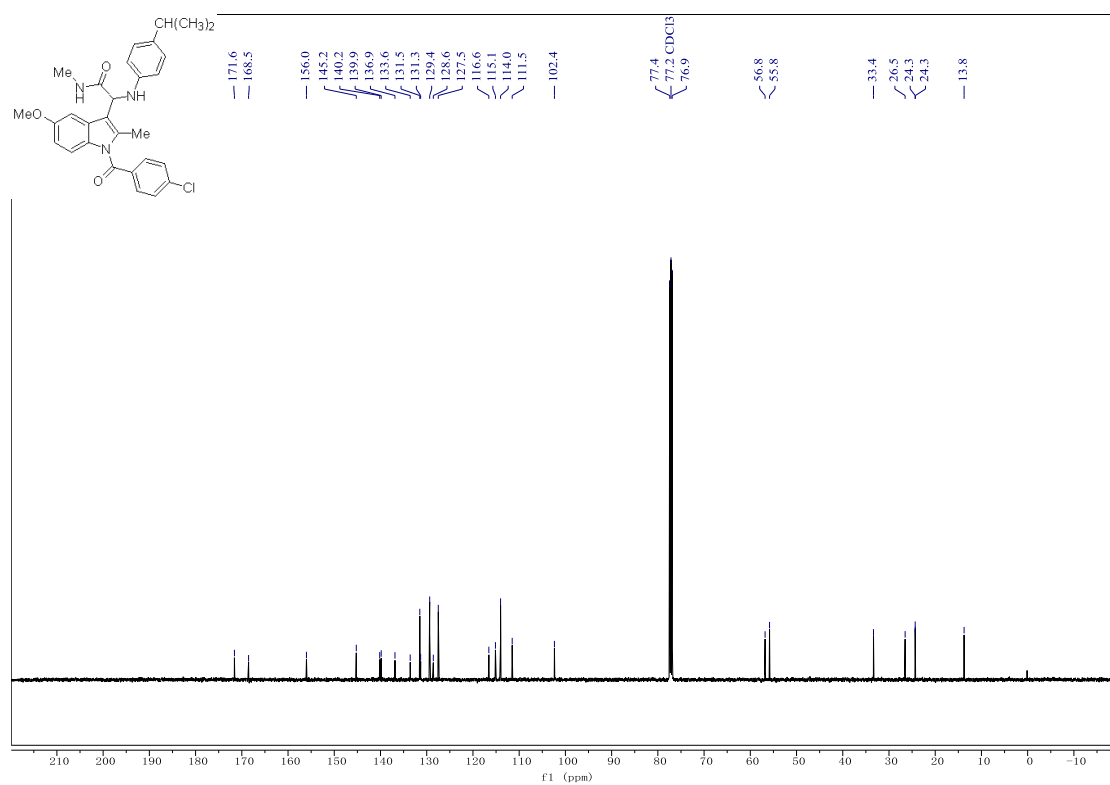

***N*<sup>2</sup>-methyl-1-(1-methyl-1*H*-indol-3-yl)-*N*<sup>1</sup>-phenylethane-1,2-diamine (11)**

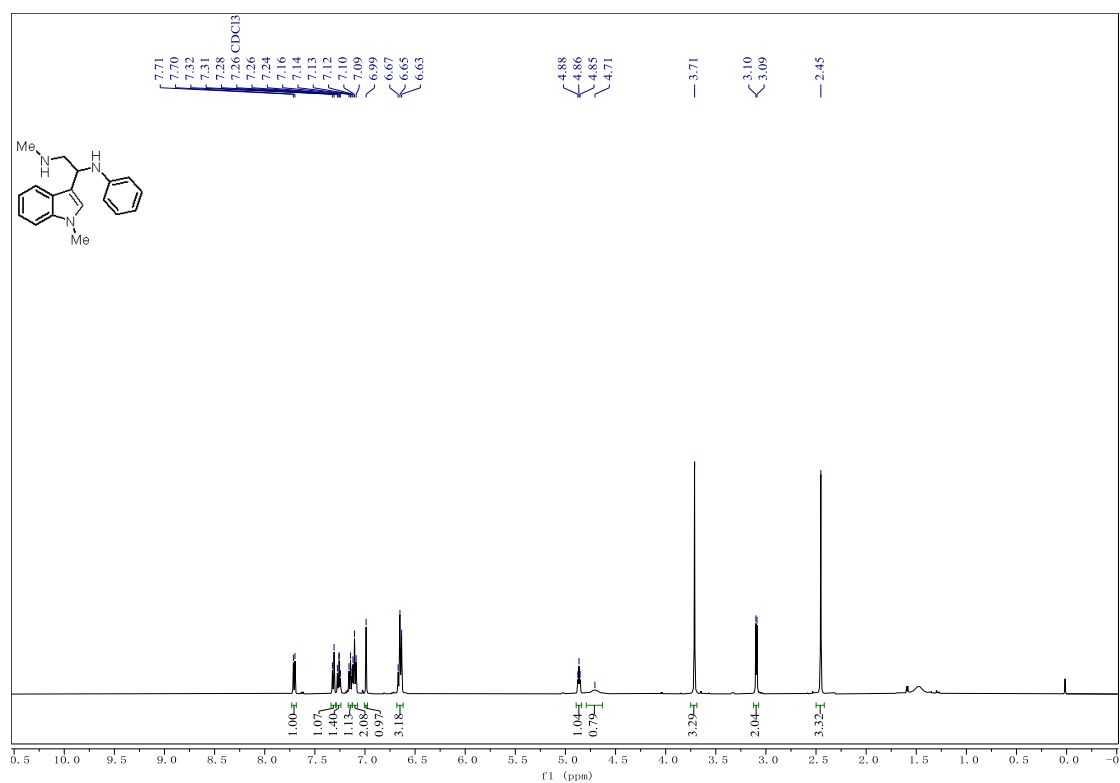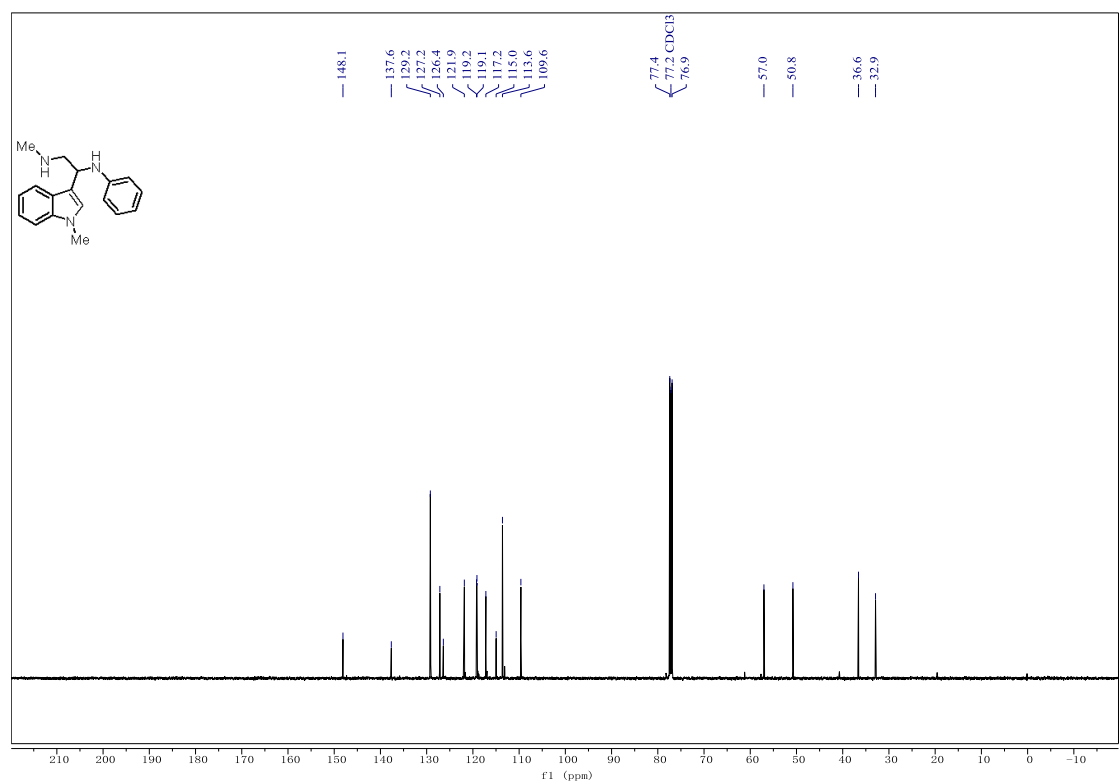



**1-methyl-4-(1-methyl-1*H*-indol-3-yl)imidazolidine-2-thione (12)**

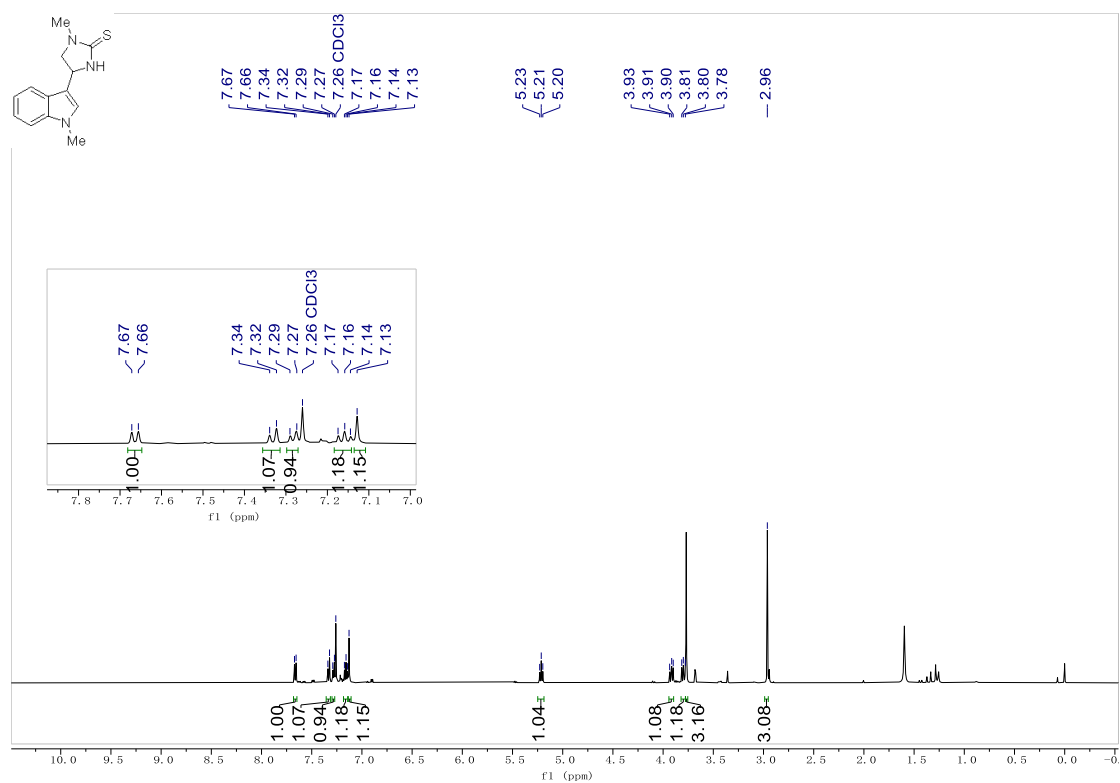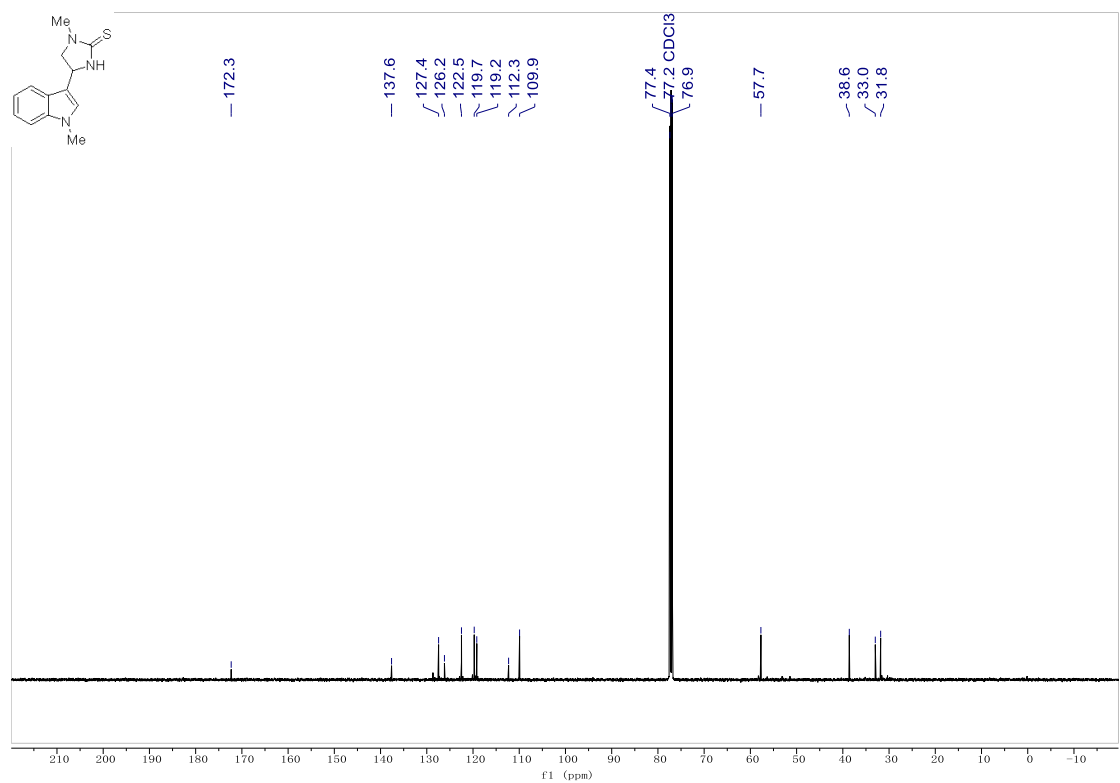

### 1-methyl-3-(1-methyl-2,3-diphenylimidazolidin-4-yl)-1H-indole (13)

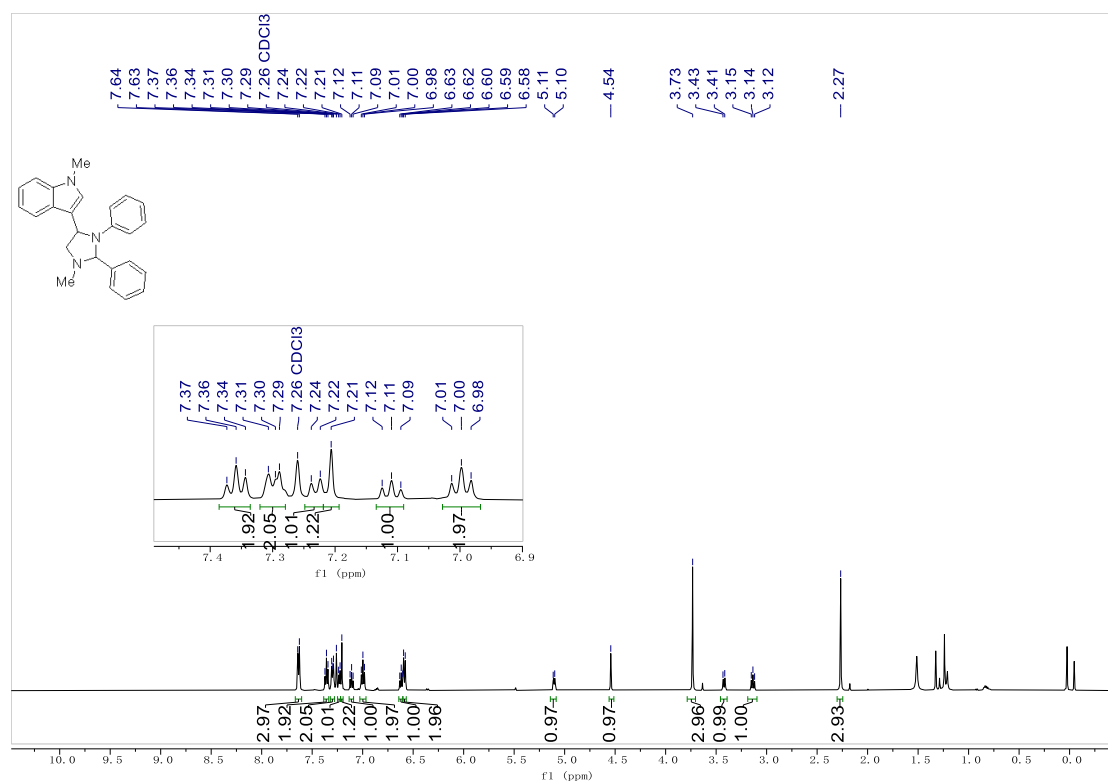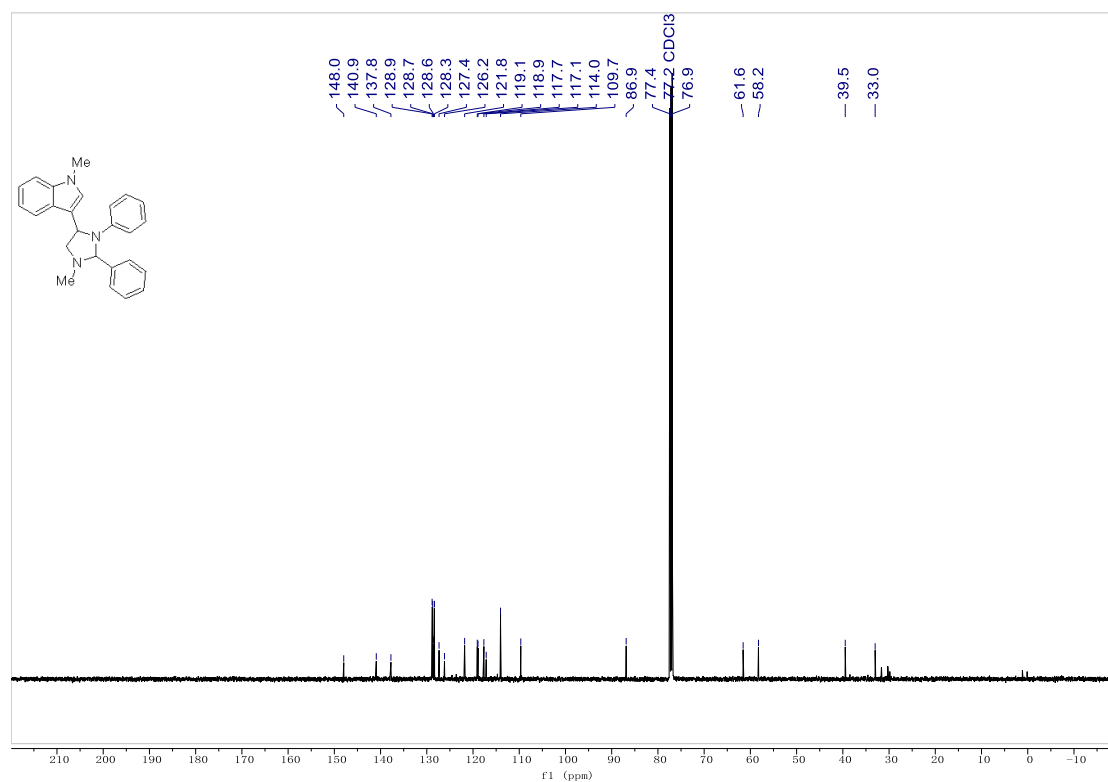

Supplement: d3qo01174g1.pdf [file d3qo01174g1.pdf]
